# Supplementary material for: The midbody and midbody remnant are assembly sites for RNA and active translation
Source: Research Square preprint supplement (doi:10.21203/rs.3.rs-2256478/v1), 2022-11-23
Supplement: Supplementary file 1 [file Table 1 Legend.docx]

Table 1: Midbody-specific transcripts.

Midbody-specific transcripts were identified as the 22 transcripts that had an enrichment score (RPKM/RPKM) of ≥ 2 when compared to both interphase ("Midbody/Interphase Enrichment Score" highlighted in yellow) and metaphase ("Midbody/Metaphase Enrichment Score" highlighted in peach). Colors and GO terms correspond to those in Figure 1C and 1D.
