# Supplementary material for: The midbody and midbody remnant are assembly sites for RNA and active translation
Source: Research Square preprint supplement (doi:10.21203/rs.3.rs-2256478/v1), 2022-11-23
Supplement: Supplementary file 6 [file Table 1-MidbodyRNAs.xlsx]

## Sheet: Sheet1
Gene Name	Protein Name	RefSeq Accession	Human Uniprot ID	GO Biological Process	Interphase Raw Reads	Interphase RPKM	Metaphase Raw Reads	Metaphase RPKM	Midbody Raw Reads	Midbody RPKM	Midbody/Interphase Enrichment Score	Midbody/Interphase Enrichment Score Log2	Midbody/Metaphase Enrichment Score	Midbody/Metaphase Enrichment Score Log2
PNRC1	Proline-rich nuclear receptor coactivator 1	XM_003495452.1	Q12796	Transcription	300	19.6956	178	18.3736	245	39.6947	2.01541	1.01107	2.16042	1.11131
IRF1	Interferon regulatory factor 1	XM_003512211.1	P10914	Transcription	346	28.9853	265	34.9039	374	77.32	2.66756	1.41552	2.21523	1.14745
NFKBIZ	NF-kappa-B inhibitor zeta	XM_003506435.1	Q9BYH8	Transcription	335	12.8831	688	41.5997	938	89.0218	6.90997	2.78868	2.13997	1.09759
KLF4	Krueppel-like factor 4	XM_003511916.1	O43474	Transcription	1652	45.6462	621	26.9781	1798	122.603	2.68595	1.42543	4.54454	2.18414
KLF6	Krueppel-like factor 6	XM_003494905.1	Q99612	Transcription	1105.5	54.6612	698	54.2627	1078	131.54	2.40646	1.26691	2.42413	1.27747
FOSB	Protein fosB	XM_003505472.1	P53539	Transcription	274	28.3758	126	20.5161	640	163.567	5.76431	2.52715	7.97263	2.99506
FOS	Proto-oncogene c-Fos	NM_001246683.1	P01100	Transcription	687	47.307	169	18.297	1104	187.61	3.9658	1.98761	10.2536	3.35805
JUN	Transcription factor AP-1	XM_003503213.1	P05412	Transcription	1437	62.0685	1232	83.6664	2375	253.161	4.07873	2.02812	3.02583	1.59733
NUPR1	Nuclear protein 1	XM_003514858.1	O60356	Transcription	919	123.127	679	143.032	989	327.003	2.65582	1.40916	2.28622	1.19297
NFKBIA	NF-kappa-B inhibitor alpha	XM_003509914.1	P25963	Transcription	1118	90.0261	870	110.147	1855	368.628	4.09468	2.03375	3.3467	1.74274
TEX14	Inactive serine/threonine-protein kinase TEX14	XM_003503801.1	Q8IWB6	Cell Cycle	348	6.30441	198	5.6397	319	14.2618	2.26219	1.17772	2.52882	1.33846
PLK2	Serine/threonine-protein kinase PLK2	XM_003496201.1	Q9NYY3	Cell Cycle	1732	49.5033	811	36.4446	1653	116.594	2.35528	1.2359	3.19922	1.67772
KIF23	Kinesin-like protein KIF23	NM_001243981.1	Q02241	Cell Cycle	3250	78.9624	2853	108.984	4568	273.893	3.46865	1.79438	2.51314	1.32949
ZFP36	mRNA decay activator protein ZFP36	XM_003503852.1	P26651	RNA Processing	1358	56.6411	765	50.1671	1523	156.765	2.76769	1.46868	3.12486	1.64379
IFRD1	Interferon-related developmental regulator 1	XM_003502230.1	O00458	Cell Fate	2309	85.3852	1502	87.3281	2049	186.99	2.18996	1.1309	2.14123	1.09844
ARL4A	ADP-ribosylation factor-like protein 4A	XM_003502228.1	P40617	Cell Fate	366	21.1283	296	26.8659	390	55.5606	2.62967	1.39488	2.06807	1.04828
SAT1	Diamine acetyltransferase 1	NM_001246689.1	P21673	Cell Fate	906	138.558	561	134.894	745	281.176	2.0293	1.02098	2.08442	1.05965
BTG2	Protein BTG2	XM_003505756.1	P78543	Cell Fate	452	54.2083	198	37.3352	765	226.416	4.17677	2.06239	6.06441	2.60037
BIRC3	Baculoviral IAP repeat-containing protein 3	XM_003496147.1	Q13489	Cell Fate	1142.5	29.512	752	30.5411	2047.5	130.522	4.42268	2.14492	4.27364	2.09547
CXCL2	C-X-C motif chemokine 2	NM_001244044.1	P19875	Signal Transduction	675	56.248	664	86.9955	1477	303.74	5.40001	2.43296	3.49144	1.80382
AREG	Amphiregulin	XM_003512371.1	P15514	Signal Transduction	1457	72.0861	1547	120.34	2047	249.936	3.46718	1.79376	2.07692	1.05445
HIST1H1E	Histone H1.4	XM_003502173.1	P10412	DNA Processing	111.667	13.7904	112.333	21.8115	175.833	53.5885	3.88594	1.95826	2.45689	1.29683
