# Supplementary material for: The midbody and midbody remnant are assembly sites for RNA and active translation
Source: Research Square preprint supplement (doi:10.21203/rs.3.rs-2256478/v1), 2022-11-23
Supplement: Supplementary file 11 [file Table 2 - Midbody over Metaphase RNAs.xlsx]

## Sheet: Sheet1
Gene Name	Protein Name	RefSeq Accession	Human Uniprot ID	GO Biological Process	Interphase Raw Reads	Interphase RPKM	Metaphase Raw Reads	Metaphase RPKM	Midbody Raw Reads	Midbody RPKM	Midbody/Interphase Enrichment Score	Midbody/Interphase Enrichment Score Log2	Midbody/Metaphase Enrichment Score	Midbody/Metaphase Enrichment Score Log2
NFKBIE	NFKB inhibitor epsilon	XM_003501678.1	O00221	Transcription	1023	43.0324	265	17.5264	383	39.7591	0.923935	-0.114137	2.26853	1.18176
KLF4	Kruppel-like factor 4 (gut)	XM_003511916.1	O43474	Transcription	1652	45.6462	621	26.9781	1798	122.603	2.68595	1.42543	4.54454	2.18414
NUPR1	nuclear protein 1, transcriptional regulator	XM_003514858.1	O60356	Transcription	919	123.127	679	143.032	989	327.003	2.65582	1.40916	2.28622	1.19297
FOS	FBJ murine osteosarcoma viral oncogene homolog	NM_001246683.1	P01100	Transcription	687	47.307	169	18.297	1104	187.61	3.9658	1.98761	10.2536	3.35805
JUN	jun proto-oncogene	XM_003503213.1	P05412	Transcription	1437	62.0685	1232	83.6664	2375	253.161	4.07873	2.02812	3.02583	1.59733
NFKBIA	NFKB inhibitor alpha	XM_003509914.1	P25963	Transcription	1118	90.0261	870	110.147	1855	368.628	4.09468	2.03375	3.3467	1.74274
ID1	inhibitor of DNA binding 1, HLH protein	XM_003502302.1	P41134	Transcription	232	21.1898	125	17.9504	178	40.1215	1.89343	0.921005	2.23513	1.16036
FOSB	FBJ murine osteosarcoma viral oncogene homolog B	XM_003505472.1	P53539	Transcription	274	28.3758	126	20.5161	640	163.567	5.76431	2.52715	7.97263	2.99506
ID3	inhibitor of DNA binding 3, HLH protein	XM_003504920.1	Q02535	Transcription	673	56.379	162	21.3375	396	81.8682	1.45211	0.538146	3.83683	1.93991
PNRC1	proline rich nuclear receptor coactivator 1	XM_003495452.1	Q12796	Transcription	300	19.6956	178	18.3736	245	39.6947	2.01541	1.01107	2.16042	1.11131
RASL11A	RAS like family 11 member A	XM_003496661.1	Q6T310	Transcription	1062	79.4374	203	23.8738	307	56.6705	0.713398	-0.487221	2.37375	1.24717
TSC22D3	TSC22 domain family member 3	XM_003500301.1	Q99576	Transcription	2499	115.325	1133	82.2077	1923	219.005	1.89903	0.92526	2.66405	1.41362
KLF6	Kruppel-like factor 6	XM_003494905.1	Q99612	Transcription	1105.5	54.6612	698	54.2627	1078	131.54	2.40646	1.26691	2.42413	1.27747
SF3B5	splicing factor 3b subunit 5	XM_003499932.1	Q9BWJ5	Transcription	1026	127.505	252	49.2386	362	111.021	0.870721	-0.199717	2.25476	1.17297
NFKBIZ	NFKB inhibitor zeta	XM_003506435.1	Q9BYH8	Transcription	335	12.8831	688	41.5997	938	89.0218	6.90997	2.78868	2.13997	1.09759
NPHP1	nephronophthisis 1 (juvenile)	XM_003497827.1	O15259	Cell Cycle	1100	35.3441	278	14.0441	379	30.0526	0.850285	-0.233981	2.13987	1.09752
THBS1	thrombospondin 1	XM_003503414.1	P07996	Cell Cycle	6058	110.611	428	12.2868	1498	67.4991	0.61024	-0.712552	5.49364	2.45776
DUSP1	dual specificity phosphatase 1	XM_003500819.1	P28562	Cell Cycle	1588	65.1326	538	34.6941	713	72.1698	1.10804	0.148015	2.08017	1.0567
KIF23	kinesin family member 23	NM_001243981.1	Q02241	Cell Cycle	3250	78.9624	2853	108.984	4568	273.893	3.46865	1.79438	2.51314	1.32949
TEX14	testis expressed 14	XM_003503801.1	Q8IWB6	Cell Cycle	348	6.30441	198	5.6397	319	14.2618	2.26219	1.17772	2.52882	1.33846
PLK2	Serine/threonine-protein kinase PLK2	XM_003496201.1	Q9NYY3	Cell Cycle	1732	49.5033	811	36.4446	1653	116.594	2.35528	1.2359	3.19922	1.67772
ZFP36	ZFP36 ring finger protein	XM_003503852.1	P26651	RNA Processing	1358	56.6411	765	50.1671	1523	156.765	2.76769	1.46868	3.12486	1.64379
SGK1	serum/glucocorticoid regulated kinase 1	XM_003511164.1	O00141	Cell Fate	814.333	24.7829	366.5	17.5368	492.667	37.0017	1.49303	0.578245	2.10995	1.07721
SGK1	serum/glucocorticoid regulated kinase 1	XM_003511163.1	O00141	Cell Fate	814.333	28.3218	366.5	20.0409	490.667	42.1137	1.48697	0.572376	2.10138	1.07134
SGK1	serum/glucocorticoid regulated kinase 1	XM_003511162.1	O00141	Cell Fate	940.333	31.4829	411	21.6352	562.667	46.4903	1.47668	0.562361	2.14883	1.10355
IFRD1	interferon related developmental regulator 1	XM_003502230.1	O00458	Cell Fate	2309	85.3852	1502	87.3281	2049	186.99	2.18996	1.1309	2.14123	1.09844
DYRK3	dual specificity tyrosine phosphorylation regulated kinase 3	XM_003501227.1	O43781	Cell Fate	738	30.2066	263	16.925	569	57.4746	1.90272	0.92806	3.39585	1.76377
LMNA	lamin A/C	XM_003502918.1	P02545	Cell Fate	2214	61.5411	766.667	33.5058	1033.17	70.8722	1.15162	0.20367	2.11522	1.08081
LMNA	lamin A/C	XM_003502919.1	P02545	Cell Fate	2197	61.1979	774.667	33.9271	1053.17	72.3972	1.183	0.242451	2.1339	1.09349
LMNA	lamin A/C	XM_003502920.1	P02545	Cell Fate	2111	60.6653	720.667	32.5621	980.667	69.5492	1.14644	0.197161	2.13589	1.09484
ANXA1	annexin A1	XM_003510471.1	P04083	Cell Fate	2962	191.122	811	82.276	2293	365.131	1.91046	0.933917	4.43788	2.14987
PDGFA	platelet derived growth factor subunit A	XM_003507075.1	P04085	Cell Fate	889	45.5548	454	36.5775	633	80.0486	1.7572	0.813274	2.18847	1.12992
CSF1	colony stimulating factor 1	XM_003514205.1	P09603	Cell Fate	533.5	16.2237	151	7.21969	273.5	20.5254	1.26515	0.339305	2.84297	1.5074
IRF1	interferon regulatory factor 1	XM_003512211.1	P10914	Cell Fate	346	28.9853	265	34.9039	374	77.32	2.66756	1.41552	2.21523	1.14745
PIM1	Pim-1 proto-oncogene, serine/threonine kinase	XM_003504139.1	P11309	Cell Fate	1844	90.1593	531	40.8197	712	85.9107	0.952878	-0.0696371	2.10464	1.07357
AREG	amphiregulin	XM_003512371.1	P15514	Cell Fate	1457	72.0861	1547	120.34	2047	249.936	3.46718	1.79376	2.07692	1.05445
LGALS3	lectin, galactoside-binding, soluble, 3	XM_003500061.1	P17931	Cell Fate	2346	158.097	1478	156.602	1887	313.824	1.98501	0.989144	2.00396	1.00286
TNFAIP3	TNF alpha induced protein 3	XM_003496545.1	P21580	Cell Fate	1448	45.3441	264	12.9982	687	53.0918	1.17086	0.227573	4.08456	2.03018
SAT1	spermidine/spermine N1-acetyltransferase 1	NM_001246689.1	P21673	Cell Fate	906	138.558	561	134.894	745	281.176	2.0293	1.02098	2.08442	1.05965
NR4A1	nuclear receptor subfamily 4 group A member 1	XM_003514528.1	P22736	Cell Fate	1057	48.9506	182	13.252	712	81.3732	1.66235	0.733226	6.14046	2.61835
DNAJA1	DnaJ heat shock protein family (Hsp40) member A1	XM_003511466.1	P31689	Cell Fate	1844	61.7382	663	34.9006	984	81.303	1.3169	0.397144	2.32956	1.22006
PTGS2	prostaglandin-endoperoxide synthase 2	XM_003496774.1	P35354	Cell Fate	3302	73.6083	579	20.2934	1712	94.1828	1.27951	0.355595	4.64106	2.21446
ARL4A	ADP ribosylation factor like GTPase 4A	XM_003502228.1	P40617	Cell Fate	366	21.1283	296	26.8659	390	55.5606	2.62967	1.39488	2.06807	1.04828
GFER	growth factor, augmenter of liver regeneration	XM_003501544.1	P55789	Cell Fate	675	55.8352	153	19.8986	226	46.1351	0.826271	-0.275312	2.31851	1.2132
BTG2	Protein BTG2	XM_003505756.1	P78543	Cell Fate	452	54.2083	198	37.3352	765	226.416	4.17677	2.06239	6.06441	2.60037
EGR3	early growth response 3	XM_003496195.1	Q06889	Cell Fate	741	46.2254	306	30.013	442	68.046	1.47205	0.557825	2.26722	1.18092
BIRC3	baculoviral IAP repeat containing 3	XM_003496147.1	Q13489	Cell Fate	1142.5	29.512	752	30.5411	2047.5	130.522	4.42268	2.14492	4.27364	2.09547
PDCD4	programmed cell death 4 (neoplastic transformation inhibitor)	XM_003510803.1	Q53EL6	Cell Fate	861	37.6425	113	7.76748	182	19.6365	0.521659	-0.938822	2.52805	1.33802
METRNL	meteorin, glial cell differentiation regulator-like	XM_003509991.1	Q641Q3	Cell Fate	486	30.9541	156	15.6218	231	36.3088	1.17299	0.230189	2.32423	1.21675
HIGD2A	HIG1 hypoxia inducible domain family member 2A	XM_003498167.1	Q9BW72	Cell Fate	636	79.792	139	27.4184	188	58.2074	0.729489	-0.455042	2.12293	1.08606
LAMTOR2	late endosomal/lysosomal adaptor, MAPK and MTOR activator 2	XM_003502922.1	Q9Y2Q5	Cell Fate	682	97.6755	179	40.307	235	83.0591	0.850357	-0.233859	2.06066	1.04311
ABHD2	abhydrolase domain containing 2	XM_003512022.1	P08910	Signal Transduction	6455	111.172	366	9.91071	469	19.9337	0.179306	-2.4795	2.01133	1.00815
CXCL2	C-X-C motif chemokine ligand 2	NM_001244044.1	P19875	Signal Transduction	675	56.248	664	86.9955	1477	303.74	5.40001	2.43296	3.49144	1.80382
CYR61	cysteine rich angiogenic inducer 61	XM_003512942.1	O00622	Signal Transduction	1666	74.572	507	35.6808	716	79.0918	1.06061	0.0848955	2.21665	1.14838
EFS	embryonal Fyn-associated substrate	XM_003506133.1	O43281	Signal Transduction	970.5	33.0824	208.5	11.1746	309.5	26.0364	0.787015	-0.345536	2.32995	1.2203
EFS	embryonal Fyn-associated substrate	XM_003506134.1	O43281	Signal Transduction	637.5	26.8307	174.5	11.5471	254.5	26.4337	0.985203	-0.0215073	2.2892	1.19485
ICAM1	intercellular adhesion molecule 1	NM_001246690.1	P05362	Signal Transduction	3523	99.9688	1121	50.013	2035	142.506	1.42551	0.511477	2.84938	1.51065
SDC4	syndecan 4	XM_003504581.1	P31431	Signal Transduction	5599	184.176	1071	55.3908	1453	117.952	0.640432	-0.642882	2.12945	1.09048
INPP1	inositol polyphosphate-1-phosphatase	XM_003515520.1	P49441	Signal Transduction	459	31.857	203	22.1521	279	47.7875	1.50006	0.585023	2.15725	1.10919
RCAN1	regulator of calcineurin 1	NM_001246731.1	P53805	Signal Transduction	1766	62.8889	534	29.8986	1053	92.54	1.47148	0.557272	3.09513	1.63
LAMA3	laminin subunit alpha 3	XM_003506628.1	Q16787	Signal Transduction	673	5.54431	183	2.37033	240	4.87935	0.880064	-0.18432	2.05851	1.0416
HIST1H1E	histone cluster 1, H1e	XM_003502173.1	P10412	DNA Processing	111.667	13.7904	112.333	21.8115	175.833	53.5885	3.88594	1.95826	2.45689	1.29683
PLAT	plasminogen activator, tissue type	XM_003503315.1	P00750	Development	1931	63.1245	423	21.7411	604	48.7271	0.771921	-0.373475	2.24124	1.1643
SERPINE1	serpin peptidase inhibitor, clade E (nexin, plasminogen activator inhibitor type 1), member 1	XM_003500937.1	P05121	Development	1930	123.523	383	38.5402	1224	193.326	1.5651	0.646255	5.0162	2.3266
PCDH7	protocadherin 7	XM_003508911.1	O60245	Development	444	9.29876	118	3.88553	153	7.90772	0.850406	-0.233776	2.03517	1.02515
ENC1	ectodermal-neural cortex 1	XM_003507088.1	O14682	Development	1319	38.608	116	5.33847	189	13.6525	0.353619	-1.49973	2.55738	1.35467
GNA13	G protein subunit alpha 13	NM_001244057.1	Q14344	Development	585	40.7095	149	16.3024	195	33.4883	0.822615	-0.28171	2.05419	1.03857
CCL2	C-C motif chemokine ligand 2	XM_003495792.1	P13500	Immune Response	1938	196.07	1008	160.341	1430	357.036	1.82096	0.864699	2.22673	1.15493
MX1	MX dynamin like GTPase 1	XM_003502632.1	P20591	Immune Response	252	7.37075	107.5	4.94362	142.5	10.2859	1.39551	0.480791	2.08065	1.05703
ODC1	Ornithine decarboxylase	XM_003509474.1	P11926	Metabolism	5506	195.985	1223	68.4446	2801	246.047	1.25544	0.32819	3.59483	1.84593
GCH1	GTP cyclohydrolase 1	XM_003500048.1	P30793	Metabolism	2211	64.5022	405	18.5766	530	38.1575	0.591569	-0.757382	2.05406	1.03848
RETSAT	retinol saturase (all-trans-retinol 13,14-reductase)	XM_003505634.1	Q6NUM9	Metabolism	677	27.6382	176	11.2969	226	22.7692	0.82383	-0.279581	2.01552	1.01116
GLRX5	glutaredoxin 5	XM_003508427.1	Q86SX6	Metabolism	1045	70.1232	133	14.0321	189	31.2986	0.446338	-1.16379	2.2305	1.15737
GNPNAT1	glucosamine-phosphate N-acetyltransferase 1	XM_003510726.1	Q96EK6	Metabolism	900	47.1283	486	40.0131	692	89.426	1.8975	0.924099	2.23492	1.16022
LCP1	lymphocyte cytosolic protein 1 (L-plastin)	XM_003500478.1	P13796	Organelle Organization	516	16.2943	118	5.85861	162	12.6247	0.774789	-0.368125	2.15489	1.10761
DSTN	destrin (actin depolymerizing factor)	XM_003496472.1	P60981	Organelle Organization	2530	117.442	509	37.149	662	75.8368	0.645737	-0.630982	2.04142	1.02957
HSPB8	heat shock protein family B (small) member 8	XM_003495910.1	Q9UJY1	Protein Processing	2551	109.526	347	23.4241	469	49.6934	0.453712	-1.14015	2.12146	1.08506
MMP9	matrix metallopeptidase 9	XM_003500527.1	P14780	Protein Processing	4303	143.096	714	37.3318	1049	86.0892	0.60162	-0.733076	2.30605	1.20543
PSMB8	proteasome subunit beta 8	XM_003505857.1	P28062	Protein Processing	643	48.1876	155	18.2634	199	36.8041	0.763766	-0.388798	2.01518	1.01091
RPL29	ribosomal protein L29	XM_003500391.1	P47914	Protein Processing	1212.92	138.92	330.333	59.4856	437.25	123.589	0.889645	-0.168698	2.07764	1.05494
ZFAND2A	zinc finger AN1-type containing 2A	XM_003507062.1	Q8N6M9	Protein Processing	883	46.4539	210	17.3703	315	40.8969	0.880375	-0.183809	2.35442	1.23537
NEURL3	neuralized E3 ubiquitin protein ligase 3	XM_003498299.1	Q96EH8	Protein Processing	439	28.1423	124	12.4981	193	30.5331	1.08495	0.117632	2.44302	1.28867
ANXA8	annexin A8	XM_003495320.1	P13928	Transport	882	63.6797	121	13.7355	188	33.4972	0.526026	-0.926794	2.43874	1.28613
ARL4C	ADP ribosylation factor like GTPase 4C	XM_003514906.1	P56559	Transport	826	44.5542	117	9.92248	186	24.7594	0.555714	-0.847587	2.49528	1.3192
SARAF	store-operated calcium entry-associated regulatory factor	XM_003499654.1	Q96BY9	Transport	1934	68.9026	406	22.7421	818	71.9201	1.04379	0.0618373	3.16242	1.66103
C8orf33	chromosome 8 open reading frame 33	XM_003515023.1	Q9H7E9	None	434	26.7567	101	9.79017	138	20.9962	0.784707	-0.349774	2.14462	1.10072
