# Supplementary material for: The midbody and midbody remnant are assembly sites for RNA and active translation
Source: Research Square preprint supplement (doi:10.21203/rs.3.rs-2256478/v1), 2022-11-23
Supplement: Supplementary file 16 [file Table 2 Legend.docx]

Table 2: Midbody-enriched transcripts in metaphase.

Midbody-enriched transcripts in metaphase were identified as the 86 transcripts that had an enrichment score (RPKM/RPKM) of ≥ 2 when compared to metaphase ("Midbody/Metaphase Enrichment Score" highlighted in peach). Colors and GO terms correspond to those in Figure 1C and 1D.
