# Supplementary material for: The midbody and midbody remnant are assembly sites for RNA and active translation
Source: Research Square preprint supplement (doi:10.21203/rs.3.rs-2256478/v1), 2022-11-23
Supplement: Supplementary file 21 [file Table 3 - Midbody over Interphase RNAs.xlsx]

## Sheet: Sheet1
Gene Name	Protein Name	RefSeq Accession	Human Uniprot ID	GO Biological Process	Interphase Raw Reads	Interphase RPKM	Metaphase Raw Reads	Metaphase RPKM	Midbody Raw Reads	Midbody RPKM	Midbody/Interphase Enrichment Score	Midbody/Interphase Enrichment Score Log2	Midbody/Metaphase Enrichment Score	Midbody/Metaphase Enrichment Score Log2
APBB3	amyloid beta precursor protein binding family B member 3	XM_003510361.1	O95704	Transcription	543	19.8472	1317	75.6854	655	59.0826	2.97687	1.5738	0.780635	-0.357281
TTF1	transcription termination factor, RNA polymerase I	XM_003515725.1	Q15361	Transcription	526.5	24.0024	717.5	51.4285	462.5	52.0338	2.16786	1.11627	1.01177	0.0168824
BDP1	B double prime 1, subunit of RNA polymerase III transcription initiation factor IIIB	XM_003503690.1	A6H8Y1	Transcription	3399	35.5787	6175	101.625	4690	121.152	3.40518	1.76773	1.19214	0.253557
SMCHD1	structural maintenance of chromosomes flexible hinge domain containing 1	XM_003511462.1	A6NHR9	Transcription	5363	60.0049	6869	120.837	4568	126.131	2.10202	1.07177	1.04382	0.0618704
ZNF850	zinc finger protein 850	XM_003515940.1	A8MQ14	Transcription	311.5	8.99767	530.5	24.0926	432	30.7946	3.4225	1.77505	1.27818	0.354086
ZNF850	zinc finger protein 850	XM_003499755.1	A8MQ14	Transcription	498.5	11.7957	718.5	26.7307	559	32.6428	2.76735	1.46851	1.22117	0.288268
ARNTL	aryl hydrocarbon receptor nuclear translocator like	XM_003508744.1	O00327	Transcription	106	11.3192	266	44.6597	205	54.0232	4.77272	2.25481	1.20966	0.274606
TRAF5	TNF receptor associated factor 5	XM_003498563.1	O00463	Transcription	453	18.5127	424	27.2435	450	45.3838	2.4515	1.29367	1.66586	0.736269
DVL1	dishevelled segment polarity protein 1	XM_003509970.1	O14640	Transcription	2396	61.6691	5664	229.208	3575	227.078	3.6822	1.88057	0.990707	-0.0134702
ZNF263	zinc finger protein 263	XM_003508703.1	O14978	Transcription	656	17.9936	1628	70.2091	1366	92.4659	5.13884	2.36144	1.31701	0.397265
MDM4	MDM4, p53 regulator	XM_003501193.1	O15151	Transcription	133.5	5.35587	463	29.2049	262.5	25.9894	4.85251	2.27873	0.889899	-0.168287
MDM4	MDM4, p53 regulator	XM_003501192.1	O15151	Transcription	192.5	7.17568	582	34.1099	358.5	32.9791	4.59596	2.20037	0.966849	-0.0486382
POLR1C	polymerase (RNA) I subunit C	XM_003508334.1	O15160	Transcription	762.5	66.1956	899	122.708	721.5	154.576	2.33515	1.22351	1.25971	0.333086
KLF4	Kruppel-like factor 4 (gut)	XM_003511916.1	O43474	Transcription	1652	45.6462	621	26.9781	1798	122.603	2.68595	1.42543	4.54454	2.18414
ZNF292	zinc finger protein 292	XM_003503771.1	O60281	Transcription	900	8.89003	3047	47.3215	1978	48.2175	5.42378	2.4393	1.01893	0.0270608
NUPR1	nuclear protein 1, transcriptional regulator	XM_003514858.1	O60356	Transcription	919	123.127	679	143.032	989	327.003	2.65582	1.40916	2.28622	1.19297
CCNT2	cyclin T2	XM_003497706.1	O60583	Transcription	445	11.8397	1157	48.3995	551	36.1786	3.05569	1.6115	0.747499	-0.419857
ZNF780A	zinc finger protein 780A	XM_003505237.1	O75290	Transcription	249.25	8.95686	719.167	40.6327	224.667	19.924	2.22444	1.15344	0.490345	-1.02813
ZNF821	zinc finger protein 821	XM_003501065.1	O75541	Transcription	306	15.519	536	42.7399	388	48.5616	3.12916	1.64578	1.13621	0.184231
FOS	FBJ murine osteosarcoma viral oncogene homolog	NM_001246683.1	P01100	Transcription	687	47.307	169	18.297	1104	187.61	3.9658	1.98761	10.2536	3.35805
JUN	jun proto-oncogene	XM_003503213.1	P05412	Transcription	1437	62.0685	1232	83.6664	2375	253.161	4.07873	2.02812	3.02583	1.59733
HMGB1	high mobility group box 1	XM_003497669.1	P09429	Transcription	663.333	43.0833	1054.83	107.718	606	97.1331	2.25454	1.17284	0.901739	-0.149218
HMGB1	high mobility group box 1	XM_003505022.1	P09429	Transcription	125.167	16.545	521	108.278	553.5	180.557	10.9131	3.44799	1.66752	0.737708
TRAPPC2B	trafficking protein particle complex 2B	XM_003498512.1	P0DI82	Transcription	616.893	45.4117	1261.79	146.039	1028.16	186.783	4.11311	2.04023	1.27899	0.355007
ZBTB48	zinc finger and BTB domain containing 48	XM_003510214.1	P10074	Transcription	785	30.1007	1702	102.611	1228	116.205	3.86053	1.9488	1.13248	0.179487
POU2F1	POU class 2 homeobox 1	XM_003502286.1	P14859	Transcription	777	23.5559	1040	49.5722	747	55.8879	2.37256	1.24645	1.1274	0.173004
GCFC2	GC-rich sequence DNA-binding factor 2	XM_003498002.1	P16383	Transcription	223	6.73213	507.5	24.0885	262	19.5194	2.89944	1.53578	0.810322	-0.303433
GCFC2	GC-rich sequence DNA-binding factor 2	XM_003498001.1	P16383	Transcription	248	7.13475	555.5	25.1268	288	20.4474	2.86589	1.51898	0.813768	-0.29731
ZNF708	zinc finger protein 708	XM_003505777.1	P17019	Transcription	117.5	4.86739	318.833	20.7657	139	14.2099	2.91941	1.54568	0.684295	-0.54731
ZNF18	zinc finger protein 18	XM_003497497.1	P17022	Transcription	138	6.57615	226	16.9327	154	18.1105	2.75397	1.46151	1.06956	0.0970154
ZNF182	zinc finger protein 182	XM_003507945.1	P17025	Transcription	232	9.25581	557	34.9388	338	33.2783	3.5954	1.84615	0.952475	-0.0702462
ZNF3	zinc finger protein 3	XM_003510416.1	P17036	Transcription	299	17.556	651	60.0981	376	54.4828	3.10338	1.63384	0.906565	-0.141517
ZNF43	zinc finger protein 43	XM_003511028.1	P17038	Transcription	306	9.11231	562	26.3129	276	20.2831	2.2259	1.15439	0.770841	-0.375494
HOXB6	homeobox B6	XM_003499552.1	P17509	Transcription	298	15.2803	1047.5	84.4489	591	74.7859	4.89429	2.2911	0.885576	-0.175312
RFX1	regulatory factor X1	XM_003501934.1	P22670	Transcription	648	12.7872	1707	52.9616	726	35.3554	2.7649	1.46723	0.667568	-0.583014
GATA3	GATA binding protein 3	XM_003494921.1	P23771	Transcription	142	5.51464	216	13.1889	127	12.1717	2.20716	1.14219	0.922874	-0.115795
BRD2	bromodomain containing 2	XM_003505900.1	P25440	Transcription	4911	132.585	7488	317.845	4425	294.819	2.22362	1.15291	0.927555	-0.108495
NFKBIA	NFKB inhibitor alpha	XM_003509914.1	P25963	Transcription	1118	90.0261	870	110.147	1855	368.628	4.09468	2.03375	3.3467	1.74274
ARID4A	AT-rich interaction domain 4A	XM_003511635.1	P29374	Transcription	1232	22.8006	1824	53.0746	1478	67.5038	2.96061	1.5659	1.27187	0.346948
KDM5A	lysine demethylase 5A	XM_003500334.1	P29375	Transcription	2070	32.5661	2572	63.6198	2159	83.8236	2.57395	1.36398	1.31757	0.39788
HOXA9	homeobox A9	XM_003501985.1	P31269	Transcription	168	5.48966	432	22.1945	284	22.9019	4.17183	2.06068	1.03187	0.0452675
DDIT3	DNA damage inducible transcript 3	XM_003507523.1	P35638	Transcription	435.833	31.4668	810	91.9483	741.5	132.118	4.19864	2.06992	1.43687	0.522933
NR4A2	nuclear receptor subfamily 4 group A member 2	XM_003506588.1	P43354	Transcription	403.607	8.25991	914.803	29.4354	560.829	28.3247	3.42917	1.77786	0.962266	-0.0554918
ATRX	alpha thalassemia/mental retardation syndrome X-linked	XM_003505304.1	P46100	Transcription	4002	35.4448	5288	73.6364	3658	79.9534	2.25572	1.17359	1.08579	0.118741
ZNF133	zinc finger protein 133	XM_003496466.1	P52736	Transcription	114	4.58521	234	14.7977	105	10.4222	2.27302	1.18461	0.704313	-0.505711
ZNF131	zinc finger protein 131	XM_003504952.1	P52739	Transcription	1724	44.5911	2971	120.82	2220	141.704	3.17785	1.66805	1.17285	0.230019
ZNF142	zinc finger protein 142	XM_003507609.1	P52746	Transcription	182	2.68756	450.333	10.4555	216.333	7.88366	2.93339	1.55257	0.754018	-0.407329
ZNF142	zinc finger protein 142	XM_003507607.1	P52746	Transcription	223.5	2.7584	485.833	9.42743	231.833	7.06113	2.55986	1.35607	0.748998	-0.416966
ZNF142	zinc finger protein 142	XM_003507608.1	P52746	Transcription	203.5	2.65745	466.833	9.58491	223.833	7.21345	2.71443	1.44065	0.752584	-0.410075
FOSB	FBJ murine osteosarcoma viral oncogene homolog B	XM_003505472.1	P53539	Transcription	274	28.3758	126	20.5161	640	163.567	5.76431	2.52715	7.97263	2.99506
MLLT10	myeloid/lymphoid or mixed-lineage leukemia; translocated to, 10	XM_003499426.1	P55197	Transcription	668	16.185	1168	44.4942	634	37.909	2.34224	1.22789	0.851998	-0.231078
IRF9	interferon regulatory factor 9	XM_003502061.1	Q00978	Transcription	314	19.1639	826	79.2611	395	59.4935	3.10446	1.63434	0.750601	-0.413881
ZNF91	zinc finger protein 91	XM_003512236.1	Q05481	Transcription	387.292	4.22954	931.911	16.0013	373.31	10.061	2.37875	1.2502	0.628763	-0.669412
ZNF91	zinc finger protein 91	XM_003511005.1	Q05481	Transcription	297.5	9.2247	388	18.9157	293.5	22.459	2.43466	1.28372	1.18732	0.247712
ZNF91	zinc finger protein 91	XM_003511004.1	Q05481	Transcription	323.5	9.54341	399	18.5066	303.5	22.0956	2.31527	1.21118	1.19393	0.255716
RING1	ring finger protein 1	XM_003505899.1	Q06587	Transcription	659	33.1448	1289	101.932	704	87.3817	2.63636	1.39855	0.857259	-0.222197
PNRC1	proline rich nuclear receptor coactivator 1	XM_003495452.1	Q12796	Transcription	300	19.6956	178	18.3736	245	39.6947	2.01541	1.01107	2.16042	1.11131
BPTF	bromodomain PHD finger transcription factor	XM_003501872.1	Q12830	Transcription	5825	55.8805	6578	99.2165	4976	117.805	2.10815	1.07598	1.18735	0.247745
STRN3	striatin 3	XM_003499178.1	Q13033	Transcription	1699	35.7246	2548	84.2364	1782	92.4698	2.58841	1.37206	1.09774	0.13454
ZBTB17	zinc finger and BTB domain containing 17	XM_003511259.1	Q13105	Transcription	1188	40.1154	1963	104.217	1376	114.665	2.85838	1.5152	1.10025	0.137828
SAFB2	scaffold attachment factor B2	XM_003501756.1	Q14151	Transcription	1611.5	44.2483	2947.5	127.246	1835.5	124.377	2.81088	1.49102	0.977446	-0.0329109
HES1	hes family bHLH transcription factor 1	XM_003507778.1	Q14469	Transcription	447	30.7537	764	82.6435	602	102.213	3.32359	1.73274	1.23679	0.306599
RBM39	RNA binding motif protein 39	XM_003501149.1	Q14498	Transcription	1501	48.8049	2850	145.698	2147.5	172.319	3.53078	1.81999	1.18272	0.242104
RBM39	RNA binding motif protein 39	XM_003501148.1	Q14498	Transcription	1491	47.9855	2843	143.858	2136.5	169.689	3.53625	1.82222	1.17956	0.238243
IRF3	interferon regulatory factor 3	XM_003514081.1	Q14653	Transcription	278	14.5093	311	25.5204	250	32.2002	2.21929	1.1501	1.26175	0.335421
ZNF638	zinc finger protein 638	XM_003514212.1	Q14966	Transcription	1603.5	21.1957	2418.5	50.2632	1757.5	57.3313	2.70486	1.43555	1.14062	0.18982
ZNF638	zinc finger protein 638	XM_003514211.1	Q14966	Transcription	1850.5	23.0841	2694.5	52.8479	1915.5	58.969	2.55453	1.35306	1.11583	0.158111
SETDB1	SET domain bifurcated 1	XM_003498654.1	Q15047	Transcription	4152.24	70.1797	14710.9	390.926	8115.04	338.484	4.8231	2.26996	0.865852	-0.207808
E2F5	E2F transcription factor 5	XM_003498600.1	Q15329	Transcription	196	10.3045	488	40.3383	323	41.9076	4.06691	2.02393	1.0389	0.0550609
TAF7	TATA-box binding protein associated factor 7	NM_001246724.1	Q15545	Transcription	324	19.4879	488	46.1493	349	51.8039	2.65827	1.41049	1.12253	0.166754
TAF1C	TATA-box binding protein associated factor, RNA polymerase I subunit C	XM_003495119.1	Q15572	Transcription	230.5	7.19242	557.5	27.3511	277	21.3305	2.9657	1.56837	0.779879	-0.358678
TAF1C	TATA-box binding protein associated factor, RNA polymerase I subunit C	XM_003495120.1	Q15572	Transcription	223.5	6.78094	550.5	26.2601	268	20.0662	2.95921	1.56521	0.764134	-0.388102
TRIP4	thyroid hormone receptor interactor 4	XM_003513591.1	Q15650	Transcription	477	21.2186	708	49.5175	475	52.1448	2.4575	1.29719	1.05306	0.074586
JMJD1C	jumonji domain containing 1C	XM_003500767.1	Q15652	Transcription	4056	37.1445	5584	80.4022	5225	118.087	3.17912	1.66863	1.4687	0.55454
EZH2	enhancer of zeste 2 polycomb repressive complex 2 subunit	XM_003496945.1	Q15910	Transcription	919	29.0668	1070	53.2098	837.5	65.371	2.24899	1.16928	1.22855	0.296958
EZH2	enhancer of zeste 2 polycomb repressive complex 2 subunit	XM_003496944.1	Q15910	Transcription	989	31.1311	1128	55.8256	878.5	68.243	2.19212	1.13232	1.22243	0.289755
EDRF1	erythroid differentiation regulatory factor 1	XM_003513870.1	Q3B7T1	Transcription	1852	31.2951	2409	64.0027	1831	76.3559	2.43986	1.2868	1.19301	0.254605
ZFP69	ZFP69 zinc finger protein	XM_003501827.1	Q49AA0	Transcription	221	9.80323	447	31.1753	271	29.6664	3.02618	1.5975	0.951599	-0.0715741
CRTC2	CREB regulated transcription coactivator 2	XM_003501659.1	Q53ET0	Transcription	1843	59.0013	2731	137.462	1680	132.728	2.24958	1.16966	0.965561	-0.0505602
ZNF678	zinc finger protein 678	XM_003509634.1	Q5SXM1	Transcription	140.344	7.83799	639.519	56.1552	312.067	43.0107	5.48746	2.45614	0.765925	-0.384725
LRIF1	ligand dependent nuclear receptor interacting factor 1	XM_003512376.1	Q5T3J3	Transcription	479	15.9425	697	36.4737	527	43.2863	2.71515	1.44103	1.18678	0.247052
ZBTB37	zinc finger and BTB domain containing 37	XM_003497665.1	Q5TC79	Transcription	113	3.59277	376	18.796	135	10.5926	2.94831	1.55989	0.563557	-0.827365
MYSM1	Myb like, SWIRM and MPN domains 1	XM_003503207.1	Q5VVJ2	Transcription	1492	22.6161	2318	55.2444	1407	52.6333	2.32725	1.21863	0.952737	-0.0698504
CAPRIN2	caprin family member 2	XM_003505487.1	Q6IMN6	Transcription	727	19.5137	1770	74.6973	1386	91.8093	4.70486	2.23415	1.22909	0.297586
NIPBL	Nipped-B homolog (Drosophila)	XM_003503992.1	Q6KC79	Transcription	3075	24.924	4927	62.7886	3535	70.7098	2.83702	1.50438	1.12616	0.171409
ZSCAN25	zinc finger and SCAN domain containing 25	XM_003516043.1	Q6NSZ9	Transcription	170	19.3305	347	62.0367	207	58.0874	3.00497	1.58735	0.936339	-0.094897
CC2D1A	coiled-coil and C2 domain containing 1A	XM_003501933.1	Q6P1N0	Transcription	486.5	14.2349	969.5	44.6011	497.5	35.9239	2.52365	1.33551	0.805448	-0.312137
CC2D1A	coiled-coil and C2 domain containing 1A	XM_003501932.1	Q6P1N0	Transcription	555.5	15.479	1085.5	47.5571	532.5	36.6182	2.36567	1.24225	0.769985	-0.377098
ZFP1	ZFP1 zinc finger protein	XM_003510167.1	Q6P2D0	Transcription	251	8.64573	365	19.7673	254	21.5913	2.49734	1.32039	1.09228	0.12734
UBN2	ubinuclein 2	XM_003503221.1	Q6ZU65	Transcription	1302	27.1169	1709	55.9624	1333	68.5136	2.5266	1.3372	1.22428	0.291932
ZNF571	zinc finger protein 571	XM_003509635.1	Q7Z3V5	Transcription	193.101	7.48078	409.587	24.9479	266.969	25.5235	3.41188	1.77057	1.02307	0.0329107
ZNF605	zinc finger protein 605	XM_003501706.1	Q86T29	Transcription	395	15.5311	769	47.5398	452	43.8593	2.82397	1.49772	0.922581	-0.116253
ZFHX4	zinc finger homeobox 4	XM_003505965.1	Q86UP3	Transcription	252	1.98545	664	8.22531	279	5.42476	2.73226	1.45009	0.659521	-0.60051
GPBP1	GC-rich promoter binding protein 1	XM_003503437.1	Q86WP2	Transcription	797	40.291	842	66.9249	732	91.3228	2.26658	1.18052	1.36456	0.448431
CIR1	corepressor interacting with RBPJ, 1	XM_003495963.1	Q86X95	Transcription	844	30.8634	1336.5	76.8416	994	89.7028	2.90644	1.53926	1.16737	0.223266
KMT5C	lysine methyltransferase 5C	XM_003508241.1	Q86Y97	Transcription	115	10.1853	190	26.4579	135	29.5071	2.89704	1.53458	1.11525	0.157368
CREBRF	CREB3 regulatory factor	XM_003500821.1	Q8IUR6	Transcription	157	3.46365	265	9.19191	158	8.60219	2.48356	1.31241	0.935844	-0.09566
ZNF654	zinc finger protein 654	XM_003497266.1	Q8IZM8	Transcription	481	13.7627	821	36.9341	588	41.5197	3.01683	1.59303	1.12416	0.168842
EID3	EP300 interacting inhibitor of differentiation 3	XM_003505845.1	Q8N140	Transcription	126	7.82308	546.56	53.3545	646.04	98.9885	12.6534	3.66145	1.8553	0.891652
CIART	circadian associated repressor of transcription	XM_003498639.1	Q8N365	Transcription	103	6.97094	457	48.6291	201	33.5713	4.81589	2.2678	0.690354	-0.534591
LCORL	ligand dependent nuclear receptor corepressor like	XM_003505980.1	Q8N3X6	Transcription	186	8.37783	590	41.7827	388	43.1289	5.14798	2.36401	1.03222	0.0457495
ZNF276	zinc finger protein 276	XM_003495075.1	Q8N554	Transcription	262	10.2914	603.5	37.2714	338.5	32.8133	3.18842	1.67284	0.880387	-0.18379
PAF1	PAF1 homolog, Paf1/RNA polymerase II complex component	XM_003503850.1	Q8N7H5	Transcription	1460	63.2697	1952	132.999	1354	144.804	2.28867	1.19451	1.08876	0.122683
ZNF513	zinc finger protein 513	XM_003497055.1	Q8N8E2	Transcription	414	14.6965	873	48.7252	598	52.3881	3.56467	1.83377	1.07518	0.104572
SCAI	suppressor of cancer cell invasion	XM_003508523.1	Q8N9R8	Transcription	134	4.9809	403	23.5523	154	14.1267	2.83618	1.50395	0.599802	-0.737442
CHD6	chromodomain helicase DNA binding protein 6	XM_003507686.1	Q8TD26	Transcription	2390	22.3729	4684	68.9395	3105	71.7307	3.20613	1.68084	1.04049	0.05726
ZNF483	zinc finger protein 483	XM_003510576.1	Q8TF39	Transcription	816	10.929	1101	23.1848	862	28.4915	2.60696	1.38237	1.22889	0.297353
ZNF473	zinc finger protein 473	XM_003510886.1	Q8WTR7	Transcription	825	22.4419	2416	103.33	1733	116.338	5.18397	2.37406	1.12588	0.171059
ANKRD49	ankyrin repeat domain 49	XM_003506480.1	Q8WVL7	Transcription	569	20.8362	1013	58.3231	695	62.8071	3.01433	1.59184	1.07688	0.106859
BBX	bobby sox homolog (Drosophila)	XM_003502013.1	Q8WY36	Transcription	1619.72	36.0356	2303.46	80.5746	1531.66	84.0953	2.33367	1.2226	1.04369	0.0616985
RSC1A1	regulatory solute carrier protein, family 1, member 1	XM_003511548.1	Q92681	Transcription	1989	72.4317	2454	140.506	1828	164.281	2.26809	1.18148	1.16921	0.225539
ZKSCAN4	zinc finger with KRAB and SCAN domains 4	XM_003505608.1	Q969J2	Transcription	416	12.5298	1056	50.0082	514	38.2061	3.04921	1.60844	0.763997	-0.388362
SGF29	SAGA complex associated factor 29	XM_003514839.1	Q96ES7	Transcription	267	23.8889	367	51.6269	284	62.7077	2.62497	1.3923	1.21463	0.280519
THOC1	THO complex 1	XM_003507136.1	Q96FV9	Transcription	980	39.2965	2376	149.796	1378	136.363	3.47009	1.79497	0.910322	-0.135551
NSD1	nuclear receptor binding SET domain protein 1	XM_003498158.1	Q96L73	Transcription	3070	27.8754	5045	72.0228	2523	56.5351	2.02814	1.02015	0.784961	-0.349306
TGS1	trimethylguanosine synthase 1	XM_003509411.1	Q96RS0	Transcription	697	21.2777	1114	53.4692	794	59.8179	2.81129	1.49123	1.11874	0.16187
IWS1	IWS1, SUPT6H interacting protein	XM_003504199.1	Q96ST2	Transcription	675	19.6339	729	33.3393	628	45.0797	2.29601	1.19913	1.35215	0.435254
MPHOSPH8	M-phase phosphoprotein 8	XM_003502034.1	Q99549	Transcription	1595	39.1136	2620	101.017	2032	122.973	3.14399	1.6526	1.21735	0.283741
KLF6	Kruppel-like factor 6	XM_003494905.1	Q99612	Transcription	1105.5	54.6612	698	54.2627	1078	131.54	2.40646	1.26691	2.42413	1.27747
ZNF184	zinc finger protein 184	XM_003512184.1	Q99676	Transcription	224	5.72803	557	22.3943	446	28.1456	4.91366	2.2968	1.25682	0.329774
MEIS3	Meis homeobox 3	XM_003508976.1	Q99687	Transcription	100	9.19741	224	32.3921	106	24.0597	2.61592	1.38732	0.742763	-0.429027
PCGF1	polycomb group ring finger 1	XM_003511132.1	Q9BSM1	Transcription	148	13.3783	239	33.9674	140	31.2309	2.33445	1.22308	0.919438	-0.121176
ZNF426	zinc finger protein 426	XM_003499753.1	Q9BUY5	Transcription	135.5	5.07731	375	22.0928	225	20.8063	4.0979	2.03488	0.941767	-0.0865577
PHF20	PHD finger protein 20	XM_003497116.1	Q9BVI0	Transcription	1780	47.5674	2190	92.0152	1745	115.081	2.41932	1.2746	1.25067	0.322704
NFKBIZ	NFKB inhibitor zeta	XM_003506435.1	Q9BYH8	Transcription	335	12.8831	688	41.5997	938	89.0218	6.90997	2.78868	2.13997	1.09759
BHLHE41	basic helix-loop-helix family member e41	XM_003507999.1	Q9C0J9	Transcription	244	30.6608	213	42.0822	228	70.7044	2.30602	1.20541	1.68015	0.748588
ESF1	ESF1 nucleolar pre-rRNA processing protein homolog	XM_003507830.1	Q9H501	Transcription	1123	48.9074	1930	132.153	1386	148.962	3.0458	1.60682	1.12719	0.172734
ZNF644	zinc finger protein 644	XM_003508964.1	Q9H582	Transcription	1728	34.8042	2262	71.632	1565	77.7895	2.23506	1.16031	1.08596	0.118972
TAF1D	TATA-box binding protein associated factor, RNA polymerase I subunit D	XM_003506491.1	Q9H5J8	Transcription	867	68.4183	2359	292.689	2035	396.31	5.79246	2.53418	1.35403	0.437261
BRD9	bromodomain containing 9	XM_003515321.1	Q9H8M2	Transcription	1731	60.4424	3330	182.816	2397	206.553	3.41735	1.77288	1.12984	0.176116
ZNF408	zinc finger protein 408	XM_003497299.1	Q9H9D4	Transcription	255	9.29899	661	37.8986	412	37.0775	3.98726	1.9954	0.978336	-0.0315981
ACTR5	ARP5 actin-related protein 5 homolog (yeast)	XM_003497123.1	Q9H9F9	Transcription	1224	51.9583	1696	113.194	1110	116.283	2.238	1.16221	1.02728	0.0388314
CBX8	chromobox 8	XM_003506700.1	Q9HC52	Transcription	150	8.96069	158	14.84	136	20.0497	2.23751	1.1619	1.35106	0.43409
MED4	mediator complex subunit 4	XM_003508406.1	Q9NPJ6	Transcription	1349	63.9368	1844	137.412	1443	168.781	2.63981	1.40043	1.22828	0.29664
ASH1L	ash1 (absent, small, or homeotic)-like (Drosophila)	XM_003501580.1	Q9NR48	Transcription	3508	30.8033	7790	107.548	4546	98.5112	3.19807	1.6772	0.915976	-0.126618
SIRT7	sirtuin 7	XM_003496941.1	Q9NRC8	Transcription	697	38.68	960.5	83.8063	631	86.4173	2.23416	1.15973	1.03116	0.0442622
CREBZF	CREB/ATF bZIP transcription factor	XM_003508013.1	Q9NS37	Transcription	555	8.0244	1820	41.373	1063	37.9289	4.7267	2.24083	0.916757	-0.125389
MRGBP	MRG/MORF4L binding protein	XM_003503118.1	Q9NV56	Transcription	463	25.146	1151	98.2853	694	93.0175	3.6991	1.88718	0.946404	-0.0794724
RBAK	RB associated KRAB zinc finger	XM_003496281.1	Q9NYW8	Transcription	237.167	6.71778	671.5	29.905	508.833	35.5685	5.29468	2.40454	1.18938	0.250214
UBP1	upstream binding protein 1 (LBP-1a)	XM_003498578.1	Q9NZI7	Transcription	1687	39.7752	3764	139.532	1946	113.229	2.84673	1.5093	0.811494	-0.301347
ZKSCAN7	zinc finger with KRAB and SCAN domains 7	XM_003500668.1	Q9P0L1	Transcription	107	3.03297	348	15.5092	198	13.8505	4.56667	2.19114	0.893055	-0.163179
RCOR3	REST corepressor 3	XM_003498574.1	Q9P2K3	Transcription	246	11.7015	581	43.4519	331	38.8555	3.32056	1.73143	0.894219	-0.161299
PSMC3IP	PSMC3 interacting protein	XM_003504658.1	Q9P2W1	Transcription	521	60.6402	730	133.589	535	153.672	2.53416	1.34151	1.15033	0.20205
ZNF639	zinc finger protein 639	XM_003509076.1	Q9UID6	Transcription	943	47.0688	1177	92.3684	925	113.941	2.42074	1.27545	1.23355	0.302819
BAZ2B	bromodomain adjacent to zinc finger domain 2B	XM_003500451.1	Q9UIF8	Transcription	590	5.5067	701	10.2869	780	17.966	3.26258	1.70601	1.7465	0.804468
ZMYM5	zinc finger MYM-type containing 5	XM_003502032.1	Q9UJ78	Transcription	1227	36.5386	2116	99.0714	1546	113.615	3.10945	1.63666	1.1468	0.197609
CCNL1	cyclin L1	XM_003498412.1	Q9UK58	Transcription	1030	62.5721	2066	197.333	1916	287.248	4.59067	2.19871	1.45565	0.541665
FAM208A	family with sequence similarity 208 member A	XM_003496124.1	Q9UK61	Transcription	813	10.2389	1954.5	38.7012	896	27.8477	2.71979	1.4435	0.719556	-0.474821
TFR2	transferrin receptor 2	XM_003510633.1	Q9UP52	Transcription	146.983	4.37204	300.333	14.0458	179.267	13.1593	3.00988	1.58971	0.936889	-0.0940495
MTF2	metal response element binding transcription factor 2	XM_003502353.1	Q9Y483	Transcription	901	31.3775	1639	89.7424	1209	103.905	3.31146	1.72747	1.15782	0.211406
PAXBP1	PAX3 and PAX7 binding protein 1	XM_003495581.1	Q9Y5B6	Transcription	1674	35.655	3624	121.361	2444	128.465	3.603	1.8492	1.05854	0.0820692
USP16	ubiquitin specific peptidase 16	XM_003495509.1	Q9Y5T5	Transcription	1656	52.8646	2611	131.05	2185	172.137	3.25619	1.70318	1.31352	0.393439
CAMTA1	calmodulin binding transcription activator 1	XM_003514769.1	Q9Y6Y1	Transcription	194.542	4.26801	877.851	30.2802	425.646	23.0451	5.39949	2.43282	0.761062	-0.393915
ATAD2B	ATPase family, AAA domain containing 2B	XM_003497704.1	Q9ULI0	Transcription	649	9.95627	1164	28.0757	994	37.6319	3.77972	1.91828	1.34037	0.422635
ZBTB43	zinc finger and BTB domain containing 43	XM_003516065.1	O43298	Transcription	1400	71.1393	1185	94.6729	1236	154.995	2.17876	1.1235	1.63716	0.7112
CREB3	cAMP responsive element binding protein 3	XM_003504986.1	O43889	Transcription	184	12.4958	189	20.1806	159	26.6478	2.13254	1.09257	1.32047	0.401048
WDHD1	WD repeat and HMG-box DNA binding protein 1	XM_003500056.1	O75717	Transcription	1235	24.0995	1714	52.587	1088	52.3949	2.1741	1.12042	0.996346	-0.00528071
PHF14	PHD finger protein 14	XM_003505972.1	O94880	Transcription	1646	49.6529	1747	82.8579	1452	108.094	2.17698	1.12233	1.30457	0.38357
ZFPL1	zinc finger protein like 1	XM_003514591.1	O95159	Transcription	404	25.6486	575	57.3952	349	54.6796	2.13188	1.09212	0.952686	-0.0699271
ERCC2	excision repair cross-complementation group 2	NM_001244391.1	P18074	Transcription	887	30.6599	1387	75.3788	737	62.8684	2.05051	1.03598	0.834033	-0.261823
TFCP2	transcription factor CP2	XM_003514118.1	Q12800	Transcription	238	12.4216	301	24.6998	209	26.9194	2.16714	1.11579	1.08986	0.124147
ZFP62	ZFP62 zinc finger protein	XM_003504048.1	Q8NB50	Transcription	311	8.1644	410	16.9229	257	16.65	2.03935	1.02811	0.983879	-0.0234477
MMS19	MMS19 homolog, cytosolic iron-sulfur assembly component	XM_003497783.1	Q96T76	Transcription	2445	54.3658	3901	136.379	2019	110.79	2.03787	1.02706	0.812368	-0.299795
KDM3A	lysine demethylase 3A	XM_003503916.1	Q9Y4C1	Transcription	1135	19.2328	1542	41.0825	921	38.5145	2.00254	1.00183	0.937492	-0.0931219
ZFP37	Zinc finger protein 37 homolog;ZFP37;ortholog	XM_003505511.1	Q9Y6Q3	Transcription	191	6.81398	261	14.6398	194	17.08	2.50661	1.32574	1.16668	0.222415
EEF2K	eukaryotic elongation factor 2 kinase	XM_003514143.1	O00418	Transcription	1016	26.8328	1244	51.6557	826	53.8357	2.00634	1.00457	1.0422	0.059635
CDC14C	cell division cycle 14C	XM_003512222.1	A4D256	Cell Cycle	537	15.449	602	27.2301	442	31.381	2.03126	1.02238	1.15244	0.204691
MYO1G	myosin IG	XM_003504764.1	B0I1T2	Cell Cycle	328	7.83406	538	20.2032	280	16.504	2.1067	1.07498	0.816898	-0.291771
CDC37L1	cell division cycle 37-like 1	XM_003506310.1	Q7L3B6	Cell Cycle	1071	58.127	1115	95.1457	913	122.286	2.10378	1.07298	1.28525	0.362051
CDK5RAP2	CDK5 regulatory subunit associated protein 2	XM_003508285.1	Q96SN8	Cell Cycle	1552	22.7563	2000	46.1068	1337	48.3792	2.12597	1.08812	1.04929	0.0694073
SFI1	SFI1 centrin binding protein	XM_003504129.1	A8K8P3	Cell Cycle	563	15.9413	1177	52.3984	678	47.3766	2.97194	1.5714	0.90416	-0.145349
PLK4	polo like kinase 4	XM_003504859.1	O00444	Cell Cycle	1456.05	34.8084	4392.03	165.082	2577.64	152.072	4.36881	2.12724	0.92119	-0.11843
PLK4	polo like kinase 4	XM_003504858.1	O00444	Cell Cycle	1722.05	37.0182	4493.03	151.857	2625.64	139.291	3.76277	1.91179	0.917251	-0.124612
PPP1R12A	protein phosphatase 1 regulatory subunit 12A	XM_003508387.1	O14974	Cell Cycle	3692	54.0939	4276	98.5031	3139	113.5	2.0982	1.06915	1.15225	0.204451
CEP290	centrosomal protein 290kDa	XM_003503599.1	O15078	Cell Cycle	760	8.05784	3751	62.5285	2315	60.5723	7.51719	2.91019	0.968715	-0.0458552
RAD1	RAD1 checkpoint DNA exonuclease	XM_003504156.1	O60671	Cell Cycle	271	17.718	352	36.1838	298	48.0817	2.71372	1.44027	1.32882	0.410145
PLA2G6	phospholipase A2 group VI	XM_003514956.1	O60733	Cell Cycle	996	29.9421	1449	68.4885	985	73.0765	2.44059	1.28723	1.06699	0.0935459
OFD1	oral-facial-digital syndrome 1	XM_003509044.1	O75665	Cell Cycle	1499	33.8266	1895	67.2345	1495	83.2562	2.46126	1.2994	1.2383	0.308355
HAUS5	HAUS augmin like complex subunit 5	XM_003505574.1	O94927	Cell Cycle	296	10.178	695	37.5734	398	33.7731	3.31825	1.73042	0.898857	-0.153837
CEP152	centrosomal protein 152kDa	XM_003506243.1	O94986	Cell Cycle	648.5	9.44025	1249.5	28.598	782.5	28.111	2.97778	1.57424	0.98297	-0.0247804
CEP152	centrosomal protein 152kDa	XM_003506242.1	O94986	Cell Cycle	725.5	10.3661	1386.5	31.1475	857.5	30.2364	2.91685	1.54441	0.970748	-0.0428312
WEE1	WEE1 G2 checkpoint kinase	XM_003511183.1	P30291	Cell Cycle	715	21.4782	1226	57.9041	1069	79.2481	3.68969	1.8835	1.36861	0.452711
CLIP1	CAP-Gly domain containing linker protein 1	XM_003498447.1	P30622	Cell Cycle	3565	49.3125	4961	107.893	3579	122.174	2.47754	1.30891	1.13236	0.179333
IER3	immediate early response 3	XM_003505887.1	P46695	Cell Cycle	1883	153.19	1898	242.775	2052	411.98	2.68934	1.42725	1.69697	0.762959
CENPF	centromere protein F	XM_003494980.1	P49454	Cell Cycle	7590	62.7507	12918	167.918	11571	236.084	3.76225	1.91159	1.40594	0.491539
DGKG	diacylglycerol kinase gamma	XM_003504227.1	P49619	Cell Cycle	103.919	2.58287	431.778	16.8731	221.735	13.6007	5.26573	2.39663	0.806058	-0.311045
BRCA2	breast cancer 2	XM_003504739.1	P51587	Cell Cycle	1709	13.0177	5272	63.1385	2866	53.875	4.13859	2.04914	0.853283	-0.228904
TUBB4B	tubulin beta 4B class IVb	NM_001244098.1	P68371	Cell Cycle	2183	112.3	1882.5	152.261	2257.5	286.598	2.55207	1.35167	1.88228	0.912484
CENPE	centromere protein E	XM_003514417.1	Q02224	Cell Cycle	6965	74.9331	9141	154.622	7807	207.279	2.76618	1.4679	1.34055	0.422824
KIF23	kinesin family member 23	NM_001243981.1	Q02241	Cell Cycle	3250	78.9624	2853	108.984	4568	273.893	3.46865	1.79438	2.51314	1.32949
CENPC	centromere protein C	XM_003511443.1	Q03188	Cell Cycle	683	17.8826	1184	48.7402	863	55.762	3.11823	1.64073	1.14407	0.194171
CAMK2G	calcium/calmodulin-dependent protein kinase II gamma	XM_003496739.1	Q13555	Cell Cycle	1572	33.3385	2068	68.9556	1471	76.9882	2.30929	1.20745	1.11649	0.158969
NCAPD2	non-SMC condensin I complex subunit D2	XM_003496047.1	Q15021	Cell Cycle	6321	112.854	8691	243.964	5749	253.303	2.24453	1.16641	1.03828	0.0541967
CDK10	cyclin-dependent kinase 10	XM_003495077.1	Q15131	Cell Cycle	344	16.0915	637	46.8493	451	52.0634	3.23546	1.69397	1.1113	0.152242
CCNG2	cyclin G2	XM_003512505.1	Q16589	Cell Cycle	116	4.09942	150	8.33453	107	9.33181	2.27638	1.18674	1.11966	0.163056
CSPP1	centrosome and spindle pole associated protein 1	XM_003514800.1	Q1MSJ5	Cell Cycle	317	7.61049	993	37.4825	743	44.021	5.78426	2.53213	1.17444	0.231976
SGO2	shugoshin-like 2 (S. pombe)	XM_003502031.1	Q562F6	Cell Cycle	1176	26.4395	1777	62.8144	1429	79.2859	2.99877	1.58437	1.26223	0.33597
ZC3H13	zinc finger CCCH-type containing 13	XM_003500476.1	Q5T200	Cell Cycle	2442	36.5045	3747	88.0665	2472	91.1943	2.49816	1.32087	1.03552	0.0503506
CCDC18	coiled-coil domain containing 18	XM_003502373.1	Q5T9S5	Cell Cycle	586	10.0029	830	22.2758	625	26.3286	2.63209	1.39621	1.18194	0.241153
CROCC	ciliary rootlet coiled-coil, rootletin	XM_003513338.1	Q5TZA2	Cell Cycle	229	3.55314	466	11.3681	210	8.04107	2.26309	1.17829	0.707336	-0.499533
RNF123	ring finger protein 123	XM_003500345.1	Q5XPI4	Cell Cycle	1807	34.196	4598	136.808	2595	121.192	3.54403	1.82539	0.885851	-0.174864
CEP135	centrosomal protein 135kDa	NM_001246723.1	Q66GS9	Cell Cycle	1939	41.4897	2656	89.3544	1937	102.284	2.4653	1.30176	1.14471	0.194977
HAUS3	HAUS augmin like complex subunit 3	XM_003508850.1	Q68CZ6	Cell Cycle	615	23.5022	975	58.5819	626	59.0371	2.51199	1.32883	1.00777	0.0111683
CDCA2	cell division cycle associated 2	XM_003496190.1	Q69YH5	Cell Cycle	1457	28.4809	2715	83.443	1850	89.245	3.1335	1.64778	1.06953	0.0969809
MIS18BP1	MIS18 binding protein 1	XM_003513896.1	Q6P0N0	Cell Cycle	1080	22.8613	2437	81.107	1807	94.3959	4.12907	2.04582	1.16384	0.218898
SASS6	SAS-6 centriolar assembly protein	XM_003513212.1	Q6UVJ0	Cell Cycle	720.5	13.8812	1487.67	45.0634	837.333	39.8116	2.86802	1.52006	0.883456	-0.178769
CENPQ	centromere protein Q	XM_003510667.1	Q7L2Z9	Cell Cycle	570	31.4332	940	81.5017	683	92.9506	2.95709	1.56418	1.14047	0.189633
HAUS6	HAUS augmin like complex subunit 6	XM_003514133.1	Q7Z4H7	Cell Cycle	395	20.8223	1076	89.1803	733	95.3571	4.57957	2.19521	1.06926	0.0966149
TEX14	testis expressed 14	XM_003503801.1	Q8IWB6	Cell Cycle	348	6.30441	198	5.6397	319	14.2618	2.26219	1.17772	2.52882	1.33846
MNS1	meiosis specific nuclear structural 1	XM_003495031.1	Q8NEH6	Cell Cycle	244.5	10.4804	291.5	19.6455	360.5	38.1349	3.63868	1.86342	1.94115	0.956911
MNS1	meiosis specific nuclear structural 1	XM_003495030.1	Q8NEH6	Cell Cycle	262.5	10.5904	294.5	18.6808	371.5	36.988	3.49259	1.8043	1.98	0.985502
PARD3B	par-3 family cell polarity regulator beta	XM_003497430.1	Q8TEW8	Cell Cycle	232	5.76086	556	21.707	321	19.6708	3.41456	1.7717	0.906197	-0.142104
ATRIP	ATR interacting protein	XM_003504241.1	Q8WXE1	Cell Cycle	568	18.9127	862	45.1271	585	48.0705	2.54171	1.3458	1.06522	0.0911566
PIBF1	progesterone immunomodulatory binding factor 1	XM_003499413.1	Q8WXW3	Cell Cycle	698	21.3495	1195	57.4681	946	71.4073	3.34467	1.74187	1.24255	0.313309
SKA1	spindle and kinetochore associated complex subunit 1	XM_003506802.1	Q96BD8	Cell Cycle	522	22.6584	727	49.6157	513	54.9534	2.4253	1.27816	1.10758	0.147411
DDX11	DEAD/H-box helicase 11	XM_003508394.1	Q96FC9	Cell Cycle	1532	38.3431	4692	184.634	2703	166.953	4.35417	2.1224	0.904233	-0.145234
TOE1	target of EGR1, member 1 (nuclear)	XM_003497377.1	Q96GM8	Cell Cycle	535	17.3597	777	39.6402	487	38.9975	2.24643	1.16764	0.983785	-0.023585
MASTL	microtubule associated serine/threonine kinase like	XM_003506604.1	Q96GX5	Cell Cycle	4037.32	64.888	8045.98	203.318	4716.68	187.079	2.88311	1.52763	0.92013	-0.12009
ZFYVE19	zinc finger FYVE-type containing 19	XM_003508313.1	Q96K21	Cell Cycle	260	11.7917	455	32.4445	305.5	34.1927	2.89972	1.53591	1.05388	0.0757137
KIF20B	kinesin family member 20B	XM_003498958.1	Q96Q89	Cell Cycle	2672.5	38.52	3837	86.9534	3547	126.168	3.27538	1.71166	1.45098	0.537028
KIF20B	kinesin family member 20B	XM_003498957.1	Q96Q89	Cell Cycle	2750.5	40.4873	3937	91.1168	3602	130.849	3.23184	1.69236	1.43605	0.522109
BBS4	Bardet-Biedl syndrome 4	XM_003502398.1	Q96RK4	Cell Cycle	436	13.992	1049	52.9292	521	41.262	2.94896	1.56021	0.779569	-0.359252
UIMC1	ubiquitin interaction motif containing 1	XM_003498159.1	Q96RL1	Cell Cycle	1266	41.3513	2007	103.069	1497	120.669	2.91814	1.54505	1.17076	0.227441
TUBGCP5	tubulin gamma complex associated protein 5	XM_003506643.1	Q96RT8	Cell Cycle	309.5	6.76373	598	20.5472	377.5	20.3592	3.01005	1.58979	0.99085	-0.013261
TUBGCP5	tubulin gamma complex associated protein 5	XM_003506644.1	Q96RT8	Cell Cycle	261.5	6.06227	498	18.1517	309.5	17.7069	2.92083	1.54638	0.975492	-0.0357985
DCLRE1C	DNA cross-link repair 1C	XM_003496419.1	Q96SD1	Cell Cycle	413	9.61966	1332	48.7797	869	49.9514	5.19263	2.37647	1.02402	0.0342418
AKAP9	A-kinase anchoring protein 9	XM_003509592.1	Q99996	Cell Cycle	2985.5	21.0204	6400.5	70.854	4309.5	74.8807	3.56228	1.8328	1.05683	0.0797437
AKAP9	A-kinase anchoring protein 9	XM_003514442.1	Q99996	Cell Cycle	103.5	11.4875	206.5	36.0354	117.5	32.1839	2.80166	1.48628	0.893121	-0.163073
NCAPG	non-SMC condensin I complex subunit G	XM_003505973.1	Q9BPX3	Cell Cycle	1311	34.3479	1476.5	60.8215	1213.5	78.4614	2.28431	1.19176	1.29003	0.367401
SLF1	SMC5-SMC6 complex localization factor 1	XM_003505278.1	Q9BQI6	Cell Cycle	1222	26.0981	2110	70.8511	1443	76.0541	2.91416	1.54308	1.07344	0.102236
CENPK	centromere protein K	XM_003507934.1	Q9BS16	Cell Cycle	299	21.3146	573	64.2223	462	81.2766	3.81319	1.931	1.26555	0.339766
CEP250	centrosomal protein 250kDa	XM_003501160.1	Q9BV73	Cell Cycle	1664	18.0424	3139	53.5128	1716	45.9173	2.54497	1.34765	0.858061	-0.220848
LRRCC1	leucine rich repeat and coiled-coil centrosomal protein 1	XM_003498599.1	Q9C099	Cell Cycle	297	7.54099	696	27.7848	371	23.2468	3.08273	1.62421	0.836675	-0.25726
CEP295	centrosomal protein 295kDa	XM_003506497.1	Q9C0D2	Cell Cycle	2757	31.3811	8677	155.284	5012	140.786	4.48634	2.16554	0.906638	-0.141402
TSPYL2	TSPY-like 2	XM_003514745.1	Q9H2G4	Cell Cycle	961	30.0222	4461	219.118	2909	224.275	7.47031	2.90117	1.02354	0.033564
PLK3	polo like kinase 3	XM_003497405.1	Q9H4B4	Cell Cycle	1015	37.1682	1393	80.2015	1313	118.656	3.1924	1.67464	1.47947	0.56508
REEP4	receptor accessory protein 4	XM_003496160.1	Q9H6H4	Cell Cycle	1221	59.9215	1651	127.391	1649	199.713	3.33291	1.73678	1.56771	0.648659
SMC4	structural maintenance of chromosomes 4	XM_003512053.1	Q9NTJ3	Cell Cycle	3860	66.5517	6134	166.281	4427	188.365	2.83035	1.50098	1.13281	0.179909
RCC2	regulator of chromosome condensation 2	XM_003514665.1	Q9P258	Cell Cycle	6955	155.041	7654	268.265	6081	334.536	2.15772	1.10951	1.24704	0.318503
CEP126	centrosomal protein 126kDa	XM_003496149.1	Q9P2H0	Cell Cycle	146	3.57586	479	18.4454	284	17.1658	4.80047	2.26317	0.930626	-0.103727
FBXO5	F-box protein 5	XM_003495892.1	Q9UKT4	Cell Cycle	551	20.5878	1054	61.9192	640	59.0143	2.86646	1.51927	0.953085	-0.0693232
MCTS1	malignant T-cell amplified sequence 1	XM_003502331.1	Q9ULC4	Cell Cycle	141	12.1076	146	19.7113	156	33.0583	2.73038	1.4491	1.67712	0.745986
INO80	INO80 complex subunit	XM_003512604.1	Q9ULG1	Cell Cycle	2672	34.9681	3947	81.2136	2437	78.7062	2.2508	1.17044	0.969127	-0.0452424
SLFN12L	schlafen family member 12-like	XM_003511310.1	Q6IEE8	Cell Cycle	305.667	12.8578	1049.5	69.411	490.667	50.936	3.96147	1.98604	0.733832	-0.446479
SLFN12L	schlafen family member 12-like	XM_003511306.1	Q6IEE8	Cell Cycle	2296.05	97.5188	2446.63	163.381	2313.23	242.462	2.48631	1.31401	1.48403	0.569517
SAMD1	sterile alpha motif domain containing 1	XM_003501909.1	Q6SPF0	Cell Cycle	547	31.4849	1355	122.625	722	102.558	3.25738	1.70371	0.836354	-0.257814
CEP128	centrosomal protein 128kDa	XM_003500985.1	Q6ZU80	Cell Cycle	579	13.8081	1050	39.3705	821	48.3189	3.49931	1.80707	1.22729	0.295473
TSGA10	testis specific 10	XM_003510869.1	Q9BZW7	Cell Cycle	184	4.36696	276	10.299	197	11.5384	2.6422	1.40174	1.12034	0.163935
ESCO2	establishment of sister chromatid cohesion N-acetyltransferase 2	XM_003505151.1	Q56NI9	Cell Cycle	1389	30.3296	1607	55.1704	1178	63.4787	2.09296	1.06555	1.15059	0.202377
RSF1	remodeling and spacing factor 1	XM_003510399.1	Q96T23	Cell Cycle	2258	34.973	2512	61.1722	1890	72.2418	2.06565	1.04659	1.18096	0.239958
KATNB1	katanin p80 (WD repeat containing) subunit B 1	XM_003509800.1	Q9BVA0	Cell Cycle	2219	68.8054	2108	102.769	1883	144.09	2.09417	1.06638	1.40208	0.487566
POLI	polymerase (DNA) iota	XM_003511838.1	Q9UNA4	Cell Cycle	357	12.1694	561	30.067	308	25.9102	2.12912	1.09026	0.861748	-0.214663
ROCK1	Rho associated coiled-coil containing protein kinase 1	XM_003507133.1	Q13464	Cell Cycle	2644	36.4196	3167	68.588	2285	77.6745	2.13276	1.09272	1.13248	0.179485
ING2	inhibitor of growth family member 2	XM_003495477.1	Q9H160	Cell Cycle	631	37.1602	545	50.4627	549	79.7882	2.14714	1.10242	1.58113	0.660958
CTAGE5	cTAGE family member 5;CTAGE5;ortholog	XM_003511079.1	O15320	Cell Cycle	1205	46.7968	1576	96.2302	991	94.9775	2.02957	1.02118	0.986983	-0.0189027
PLK2	Serine/threonine-protein kinase PLK2;PLK2;ortholog	XM_003496201.1	Q9NYY3	Cell Cycle	1732	49.5033	811	36.4446	1653	116.594	2.35528	1.2359	3.19922	1.67772
SEPT3	septin 3	XM_003512343.1	Q9UH03	Cell Cycle	218	10.3013	475	35.2903	190	22.1569	2.15087	1.10492	0.627845	-0.67152
DNHD1	dynein heavy chain domain 1	XM_003512864.1	Q96M86	Cell Cycle	142	0.783565	559	4.8498	212	2.88696	3.68439	1.88143	0.595273	-0.748376
SESN2	sestrin 2	XM_003498381.1	P58004	Cell Cycle	557	22.7393	604	38.7689	511	51.4825	2.26404	1.1789	1.32793	0.409183
RRS1	ribosome biogenesis regulator homolog	XM_003496087.1	Q15050	RNA processing	174	16.2113	207	30.3225	144	33.1093	2.04236	1.03023	1.0919	0.126846
SRRT	serrate, RNA effector molecule	NM_001246719.1	Q9BXP5	RNA processing	791	59.9624	944	112.512	655	122.535	2.04354	1.03107	1.08908	0.123116
PSD	pleckstrin and Sec7 domain containing	XM_003508045.1	A5PKW4	RNA processing	304	6.19571	1412	45.2458	572	28.7695	4.64345	2.2152	0.635848	-0.653245
NOP56	NOP56 ribonucleoprotein	XM_003499045.1	O00567	RNA processing	3353	140.818	5255	346.996	3996	414.161	2.9411	1.55636	1.19356	0.255274
U2SURP	U2 snRNP-associated SURP domain containing	XM_003495505.1	O15042	RNA processing	2321	65.9557	3889	173.756	2561	179.599	2.72303	1.44521	1.03363	0.0477159
KIAA0391	KIAA0391	XM_003515670.1	O15091	RNA processing	161	29.7544	181	52.5932	182	83.007	2.78974	1.48013	1.57828	0.658357
ZFC3H1	zinc finger C3H1-type containing	XM_003499233.1	O60293	RNA processing	2638	33.2973	5456	108.276	3339	104.008	3.12363	1.64322	0.960582	-0.0580197
ZC3H11A	zinc finger CCCH-type containing 11A	XM_003505748.1	O75152	RNA processing	3323	60.998	5366	154.868	3211	145.46	2.38467	1.25379	0.939252	-0.0904165
WBP4	WW domain binding protein 4	XM_003513802.1	O75554	RNA processing	1063	39.5872	1833	107.327	1490	136.939	3.45916	1.79042	1.2759	0.351513
POP7	POP7 homolog, ribonuclease P/MRP subunit	XM_003510636.1	O75817	RNA processing	431	53.0606	424	82.0704	418	126.996	2.39341	1.25907	1.5474	0.629847
PRPF6	pre-mRNA processing factor 6	XM_003503156.1	O94906	RNA processing	1080	82.5842	1293	155.452	1060	200.031	2.42215	1.27629	1.28677	0.36375
PCF11	PCF11 cleavage and polyadenylation factor subunit	XM_003507019.1	O94913	RNA processing	2172	29.9599	4295	93.1472	2369	80.6425	2.69168	1.42851	0.865753	-0.207972
LUC7L3	LUC7-like 3 pre-mRNA splicing factor	XM_003501380.1	O95232	RNA processing	1281	54.672	2277	152.793	1756	184.952	3.38293	1.75827	1.21047	0.275566
DUS4L	dihydrouridine synthase 4 like	XM_003511110.1	O95620	RNA processing	251.3	10.8366	447.933	30.3697	242.933	25.8528	2.38568	1.2544	0.851267	-0.232316
SSB	Sjogren syndrome antigen B	XM_003495943.1	P05455	RNA processing	2453	135.652	3424	297.707	2367	323.032	2.38133	1.25176	1.08507	0.117785
ZFP36	ZFP36 ring finger protein	XM_003503852.1	P26651	RNA processing	1358	56.6411	765	50.1671	1523	156.765	2.76769	1.46868	3.12486	1.64379
HNRNPH3	heterogeneous nuclear ribonucleoprotein H3	XM_003500992.1	P31942	RNA processing	353	11.2009	938.5	46.8206	515	40.3276	3.6004	1.84816	0.861321	-0.215376
HNRNPH3	heterogeneous nuclear ribonucleoprotein H3	XM_003500993.1	P31942	RNA processing	369	11.9243	965.5	49.0552	529	42.1872	3.53791	1.8229	0.859994	-0.217601
HNRNPH1	heterogeneous nuclear ribonucleoprotein H1 (H)	XM_003505379.1	P31943	RNA processing	2524	100.799	3598	225.919	2397	236.239	2.34367	1.22877	1.04568	0.0644426
MATR3	matrin 3	XM_003507307.1	P43243	RNA processing	3227	58.9888	3991	114.704	2883	130.057	2.20477	1.14063	1.13385	0.181228
HARS2	histidyl-tRNA synthetase 2	XM_003510364.1	P49590	RNA processing	2073	69.5824	2994	158.008	2124	175.943	2.52856	1.33832	1.11351	0.155117
CLK1	CDC like kinase 1	XM_003507032.1	P49759	RNA processing	880	39.1897	1119	78.3511	904	99.3518	2.53515	1.34207	1.26803	0.342592
RPP38	ribonuclease P/MRP 38kDa subunit	XM_003496422.1	P78345	RNA processing	328	26.6568	453	57.8839	374	75.0107	2.81395	1.49259	1.29588	0.373935
RPP14	ribonuclease P/MRP 14kDa subunit	XM_003502729.1	P86397	RNA processing	2007.35	95.0256	3849.15	286.489	2826.25	330.177	3.47461	1.79685	1.15249	0.20476
AKAP17A	A-kinase anchoring protein 17A	XM_003500032.1	Q02040	RNA processing	166	4.47088	215	9.10436	237	15.7526	3.52337	1.81696	1.73022	0.790958
SRSF11	serine/arginine-rich splicing factor 11	XM_003501336.1	Q05519	RNA processing	2601	33.5055	5908	119.658	4120	130.976	3.90908	1.96683	1.09458	0.130382
SRSF4	serine/arginine-rich splicing factor 4	XM_003498349.1	Q08170	RNA processing	1630	61.752	2636	157.013	1743	162.959	2.63893	1.39995	1.03787	0.05363
CPSF1	cleavage and polyadenylation specific factor 1	XM_003507657.1	Q10570	RNA processing	971	17.5585	1575.5	44.7932	878.167	39.1889	2.23191	1.15828	0.874885	-0.192835
CPSF1	cleavage and polyadenylation specific factor 1	XM_003507658.1	Q10570	RNA processing	902.5	16.9369	1422.5	41.9725	788.167	36.5025	2.15521	1.10783	0.869677	-0.201448
CPSF1	cleavage and polyadenylation specific factor 1	XM_003507659.1	Q10570	RNA processing	957.5	17.3701	1519	43.3259	835.667	37.4123	2.15383	1.10691	0.86351	-0.211715
SFSWAP	splicing factor, suppressor of white-apricot homolog	XM_003509487.1	Q12872	RNA processing	2071	49.3599	3106	116.391	2395	140.87	2.85393	1.51295	1.21031	0.275376
SRSF5	serine/arginine-rich splicing factor 5	XM_003498255.1	Q13243	RNA processing	1659	88.1009	2043	170.58	1705	223.448	2.53627	1.34271	1.30993	0.38949
PRPF4B	pre-mRNA processing factor 4B	XM_003497474.1	Q13523	RNA processing	3170	54.7389	5974	162.191	4657	198.455	3.62548	1.85817	1.22358	0.291111
TRA2A	transformer 2 alpha homolog (Drosophila)	XM_003507453.1	Q13595	RNA processing	1632	78.3855	2079	156.999	1489	176.493	2.25161	1.17096	1.12417	0.168862
SKIV2L	Ski2 like RNA helicase	XM_003508498.1	Q15477	RNA processing	843	17.8254	1587	52.7611	906	47.2778	2.65228	1.40723	0.896073	-0.158311
CTU2	cytosolic thiouridylase subunit 2 homolog (S. pombe)	XM_003495091.1	Q2VPK5	RNA processing	603	29.4827	1399	107.546	848	102.321	3.47054	1.79516	0.951416	-0.0718519
PAN2	PAN2 poly(A) specific ribonuclease subunit	XM_003506184.1	Q504Q3	RNA processing	1928	36.3116	3318	98.2519	1746	81.1524	2.23489	1.1602	0.825962	-0.275852
DALRD3	DALR anticodon binding domain containing 3	XM_003512167.1	Q5D0E6	RNA processing	779	35.6991	993	71.5476	719	81.3143	2.27777	1.18762	1.13651	0.184606
RBM26	RNA binding motif protein 26	XM_003503056.1	Q5T8P6	RNA processing	2174	47.1963	3534	120.626	2640	141.439	2.99683	1.58344	1.17255	0.229644
PRPF38B	pre-mRNA processing factor 38B	XM_003514802.1	Q5VTL8	RNA processing	2052	48.5551	4417	164.328	3629	211.915	4.36443	2.12579	1.28959	0.366913
SNRNP48	small nuclear ribonucleoprotein U11/U12 subunit 48	XM_003502004.1	Q6IEG0	RNA processing	351	22.41	610	61.2336	539	84.9261	3.78966	1.92207	1.38692	0.471884
TYW3	tRNA-yW synthesizing protein 3 homolog	XM_003503987.1	Q6IPR3	RNA processing	259	28.5058	443	76.659	268	72.7925	2.5536	1.35253	0.949562	-0.0746659
PRPF40B	pre-mRNA processing factor 40 homolog B	XM_003513496.1	Q6NWY9	RNA processing	368	9.18124	1524	59.7812	692	42.6067	4.64062	2.21432	0.712711	-0.488611
DUS1L	dihydrouridine synthase 1 like	XM_003496907.1	Q6P1R4	RNA processing	1008	47.9765	1492	111.651	959	112.643	2.34788	1.23136	1.00889	0.012763
TSEN54	tRNA splicing endonuclease subunit 54	XM_003495697.1	Q7Z6J9	RNA processing	665	25.061	1531	90.7146	1143	106.302	4.24173	2.08465	1.17183	0.228759
MTERF4	mitochondrial transcription termination factor 4	XM_003499258.1	Q7Z6M4	RNA processing	368	27.2679	545	63.493	414	75.7045	2.77633	1.47318	1.19233	0.253782
PRPF39	pre-mRNA processing factor 39	XM_003512272.1	Q86UA1	RNA processing	1952	47.6313	4133	158.564	2404.5	144.796	3.03993	1.60404	0.91317	-0.131045
ZC3H3	zinc finger CCCH-type containing 3	XM_003510436.1	Q8IXZ2	RNA processing	1736	43.2432	3561	139.465	1935	118.951	2.75074	1.45982	0.852906	-0.229541
TRMT2A	tRNA methyltransferase 2 homolog A	XM_003502454.1	Q8IZ69	RNA processing	844	33.3016	1192.5	73.9788	897	87.3441	2.62282	1.39112	1.18066	0.239598
TRMT2A	tRNA methyltransferase 2 homolog A	XM_003502453.1	Q8IZ69	RNA processing	1043	35.6	1333.5	71.5622	976	82.2116	2.30932	1.20747	1.14881	0.200143
XRN1	5'-3' exoribonuclease 1	XM_003495487.1	Q8IZH2	RNA processing	1091	14.8491	1918	41.0439	1346	45.2103	3.04466	1.60628	1.10151	0.139484
CELF5	CUGBP, Elav-like family member 5	XM_003506464.1	Q8N6W0	RNA processing	156	7.19915	251	18.2119	158	17.9942	2.49949	1.32163	0.988043	-0.017355
TSEN2	tRNA splicing endonuclease subunit 2	XM_003507341.1	Q8NCE0	RNA processing	518	23.4523	2040	145.215	1016	113.519	4.84041	2.27513	0.781728	-0.355261
PAPD5	PAP associated domain containing 5	XM_003499508.1	Q8NDF8	RNA processing	2322	47.9806	3840	124.756	2197	112.034	2.33499	1.22342	0.898031	-0.155164
ZDHHC1	zinc finger DHHC-type containing 1	XM_003508549.1	Q8WTX9	RNA processing	237	10.8421	492	35.3879	376	42.4492	3.91523	1.9691	1.19954	0.262482
SREK1	splicing regulatory glutamic acid/lysine-rich protein 1	XM_003499201.1	Q8WXA9	RNA processing	1634	32.3576	5216	162.401	4596	224.607	6.94138	2.79522	1.38304	0.467843
GTPBP3	GTP binding protein 3 (mitochondrial)	XM_003499136.1	Q969Y2	RNA processing	931	41.3443	2084	145.509	1309	143.457	3.46983	1.79486	0.985903	-0.0204823
RRNAD1	ribosomal RNA adenine dimethylase domain containing 1	XM_003502902.1	Q96FB5	RNA processing	299	14.8398	816	63.6754	455	55.7295	3.75542	1.90897	0.875212	-0.192295
DDX27	DEAD-box helicase 27	XM_003502477.1	Q96GQ7	RNA processing	3133	99.8937	4105	205.786	2892	227.559	2.27801	1.18778	1.1058	0.145093
METTL2A	methyltransferase like 2A	XM_003495949.1	Q96IZ6	RNA processing	113.31	5.8252	238.624	19.2879	122.443	15.5345	2.66677	1.41509	0.805401	-0.312222
RNPC3	RNA binding region (RNP1, RRM) containing 3	XM_003514796.1	Q96LT9	RNA processing	348	12.1999	918	50.5995	527	45.5938	3.73723	1.90197	0.901073	-0.150283
POP1	POP1 homolog, ribonuclease P/MRP subunit	XM_003504075.1	Q99575	RNA processing	1136	31.0301	2027	87.0532	1324	89.2507	2.87626	1.52419	1.02524	0.0359649
QTRT1	queuine tRNA-ribosyltransferase catalytic subunit 1	XM_003499770.1	Q9BXR0	RNA processing	485	41.8286	1065	144.413	505	107.483	2.56961	1.36155	0.744276	-0.42609
UPF3B	UPF3 regulator of nonsense transcripts homolog B (yeast)	XM_003500026.1	Q9BZI7	RNA processing	698	42.2083	811	77.1062	643	95.9558	2.27339	1.18484	1.24446	0.315525
WDR33	WD repeat domain 33	XM_003510844.1	Q9C0J8	RNA processing	347	11.5249	692	36.1359	378	30.9825	2.68832	1.4267	0.857389	-0.221978
NSRP1	nuclear speckle splicing regulatory protein 1	XM_003506083.1	Q9H0G5	RNA processing	838	34.6048	1278	82.9753	899	91.6157	2.64749	1.40462	1.10413	0.142913
DHX36	DEAH-box helicase 36	XM_003508035.1	Q9H2U1	RNA processing	2410.68	34.8099	3747.75	85.0861	2463.65	87.793	2.52207	1.33461	1.03181	0.045182
PNN	pinin, desmosome associated protein	XM_003514700.1	Q9H307	RNA processing	2459	55.5378	5655	200.811	3646	203.219	3.65912	1.8715	1.01199	0.0171954
TRIT1	tRNA isopentenyltransferase 1	XM_003505056.1	Q9H3H1	RNA processing	228	11.6682	403	32.4264	254.5	32.1421	2.75468	1.46188	0.991231	-0.0127063
TRIT1	tRNA isopentenyltransferase 1	XM_003505055.1	Q9H3H1	RNA processing	262	13.7014	423	34.78	262.5	33.8775	2.47256	1.306	0.97405	-0.0379324
YTHDC2	YTH domain containing 2	XM_003507287.1	Q9H6S0	RNA processing	915	16.7843	1239	35.7338	869	39.3387	2.34378	1.22884	1.10088	0.13866
AGO3	argonaute 3, RISC catalytic component	XM_003500893.1	Q9H9G7	RNA processing	312	7.84611	684	27.0447	431	26.7482	3.40911	1.76939	0.989039	-0.0159006
UPF2	UPF2 regulator of nonsense transcripts homolog (yeast)	XM_003496399.1	Q9HAU5	RNA processing	1598	24.3257	2576	61.6538	1841	69.1608	2.84312	1.50747	1.12176	0.165765
CLK4	CDC like kinase 4	XM_003498494.1	Q9HAZ1	RNA processing	314	13.7814	783	54.032	410	44.4084	3.22235	1.68811	0.821891	-0.282981
OSGEP	O-sialoglycoprotein endopeptidase	XM_003509206.1	Q9NPF4	RNA processing	494	30.1263	616	59.0643	454	68.327	2.26802	1.18143	1.15682	0.21017
LUC7L	LUC7-like	XM_003501549.1	Q9NQ29	RNA processing	1130	48.1754	1544	103.495	1135	119.415	2.47877	1.30962	1.15383	0.206427
TRMT13	tRNA methyltransferase 13 homolog (S. cerevisiae)	XM_003515783.1	Q9NUP7	RNA processing	316.583	7.89845	856.093	33.5815	491.317	30.2505	3.82994	1.93732	0.900809	-0.150706
GEMIN8	gem nuclear organelle associated protein 8	XM_003509038.1	Q9NWZ8	RNA processing	554.167	22.1762	1439.08	90.5436	703.85	69.5095	3.13442	1.6482	0.767691	-0.381402
TRMT6	tRNA methyltransferase 6	XM_003495260.1	Q9UJA5	RNA processing	1835.5	50.3813	3660.33	157.965	2112.95	143.127	2.84088	1.50634	0.906069	-0.142306
PTBP2	polypyrimidine tract binding protein 2	XM_003514023.1	Q9UKA9	RNA processing	340	8.45594	1007	39.3766	645	39.5877	4.68165	2.22702	1.00536	0.00771523
DDX52	DEAD-box helicase 52	XM_003510616.1	Q9Y2R4	RNA processing	799.5	28.1659	1103	61.0951	870	75.6384	2.68546	1.42517	1.23804	0.308062
DDX52	DEAD-box helicase 52	XM_003510617.1	Q9Y2R4	RNA processing	597.5	25.2549	650	43.1964	487	50.7991	2.01145	1.00824	1.176	0.23389
NOP58	NOP58 ribonucleoprotein	XM_003497410.1	Q9Y2X3	RNA processing	2979	115.181	3762	228.694	2873	274.134	2.38003	1.25098	1.1987	0.261466
LUC7L2	LUC7-like 2 pre-mRNA splicing factor	XM_003503219.1	Q9Y383	RNA processing	1203.33	42.6019	1820.83	101.354	1254.67	109.62	2.57312	1.36352	1.08156	0.113113
LUC7L2	LUC7-like 2 pre-mRNA splicing factor	XM_003503218.1	Q9Y383	RNA processing	1247.83	42.3168	1882.33	100.364	1310.17	109.648	2.59112	1.37358	1.0925	0.127636
LUC7L2	LUC7-like 2 pre-mRNA splicing factor	XM_003503220.1	Q9Y383	RNA processing	1339.83	43.4037	2183.83	111.23	1556.17	124.408	2.86631	1.5192	1.11848	0.161542
EXOSC1	exosome component 1	XM_003497752.1	Q9Y3B2	RNA processing	405	30.2652	512.5	60.2155	351.5	64.8235	2.14185	1.09886	1.07652	0.106381
EXOSC1	exosome component 1	XM_003497753.1	Q9Y3B2	RNA processing	255	22.0164	369.5	50.1588	257.5	54.8658	2.49204	1.31733	1.09384	0.129406
SRSF10	serine/arginine-rich splicing factor 10	XM_003504932.1	O75494	RNA processing	526	79.9781	584	139.612	431	161.726	2.02213	1.01588	1.1584	0.212127
ZRSR2	U2 small nuclear ribonucleoprotein auxiliary factor 35 kDa subunit-related protein 2;ZRSR2;ortholog	XM_003511522.1	Q15696	RNA processing	499	24.3978	885	68.0328	558	67.3289	2.75964	1.46448	0.989654	-0.0150045
DFFA	DNA fragmentation factor subunit alpha	XM_003516124.1	O00273	Cell Fate	318	66.5639	363	119.466	303	156.521	2.35144	1.23354	1.31017	0.389756
IFRD1	interferon related developmental regulator 1	XM_003502230.1	O00458	Cell Fate	2309	85.3852	1502	87.3281	2049	186.99	2.18996	1.1309	2.14123	1.09844
ZBTB24	zinc finger and BTB domain containing 24	XM_003496989.1	O43167	Cell Fate	244	9.28845	570	34.1157	242	22.7346	2.44762	1.29138	0.666397	-0.585547
DFNA5	deafness, autosomal dominant 5	XM_003498555.1	O60443	Cell Fate	248	8.33502	1790	94.5875	1420	117.777	14.1304	3.82073	1.24517	0.316339
DIAPH2	diaphanous related formin 2	XM_003507682.1	O60879	Cell Fate	231	12.6855	1551	133.916	1267	171.708	13.5358	3.7587	1.2822	0.358626
DIAPH2	diaphanous related formin 2	XM_003512025.1	O60879	Cell Fate	242	13.8989	1303	117.662	825	116.933	8.41311	3.07264	0.993806	-0.00896321
GADD45B	growth arrest and DNA damage inducible beta	XM_003506457.1	O75293	Cell Fate	389	50.2414	329	66.8088	419	133.55	2.65817	1.41043	1.99899	0.999271
LRIG2	leucine-rich repeats and immunoglobulin-like domains 2	XM_003509316.1	O94898	Cell Fate	272.5	6.89231	379	15.0717	260	16.2289	2.35464	1.23551	1.07678	0.106722
NGF	nerve growth factor	XM_003503859.1	P01138	Cell Fate	127	9.4816	137	16.0814	151	27.821	2.93421	1.55297	1.73001	0.790781
CSF3	colony stimulating factor 3	XM_003515885.1	P09919	Cell Fate	146	18.3755	121	23.944	131	40.6888	2.2143	1.14685	1.69933	0.764968
IRF1	interferon regulatory factor 1	XM_003512211.1	P10914	Cell Fate	346	28.9853	265	34.9039	374	77.32	2.66756	1.41552	2.21523	1.14745
SKIL	SKI-like proto-oncogene	XM_003503494.1	P12757	Cell Fate	532	18.8514	642.5	35.7958	653.5	57.1474	3.03146	1.60001	1.59648	0.674899
SKIL	SKI-like proto-oncogene	XM_003503493.1	P12757	Cell Fate	583	19.4532	678.5	35.5957	699.5	57.6007	2.96099	1.56608	1.61819	0.694383
AREG	amphiregulin	XM_003512371.1	P15514	Cell Fate	1457	72.0861	1547	120.34	2047	249.936	3.46718	1.79376	2.07692	1.05445
NR1D1	nuclear receptor subfamily 1 group D member 1	XM_003510480.1	P20393	Cell Fate	491.5	19.1821	526.5	32.3069	544.167	52.4109	2.73229	1.45011	1.62228	0.698023
CDK11B	cyclin-dependent kinase 11B	XM_003516117.1	P21127	Cell Fate	142.167	28.3306	284.167	89.0342	216.083	106.267	3.75095	1.90726	1.19355	0.255258
CDK11B	cyclin-dependent kinase 11B	XM_003514846.1	P21127	Cell Fate	1507.03	42.1125	3171.1	139.323	2462.68	169.83	4.03277	2.01177	1.21896	0.285656
CDK11B	cyclin-dependent kinase 11B	XM_003514847.1	P21127	Cell Fate	1430.53	40.404	2987.1	132.648	2312.68	161.198	3.98966	1.99627	1.21523	0.28123
CDK11B	cyclin-dependent kinase 11B	XM_003514849.1	P21127	Cell Fate	1078.6	50.4842	2066.3	152.06	1650.88	190.691	3.77724	1.91733	1.25405	0.326596
SAT1	spermidine/spermine N1-acetyltransferase 1	NM_001246689.1	P21673	Cell Fate	906	138.558	561	134.894	745	281.176	2.0293	1.02098	2.08442	1.05965
DNMT1	DNA (cytosine-5-)-methyltransferase 1	XM_003499746.1	P26358	Cell Fate	6736	103.437	9278	224.003	7285	276.072	2.66898	1.41629	1.23244	0.301523
ARL4A	ADP ribosylation factor like GTPase 4A	XM_003502228.1	P40617	Cell Fate	366	21.1283	296	26.8659	390	55.5606	2.62967	1.39488	2.06807	1.04828
RBM25	RNA binding motif protein 25	XM_003505120.1	P49756	Cell Fate	3541	65.9197	5771	168.914	4094	188.086	2.85325	1.51261	1.1135	0.155098
RBM5	RNA binding motif protein 5	XM_003500410.1	P52756	Cell Fate	1310	33.5967	3380	136.291	2057	130.19	3.87508	1.95423	0.955234	-0.0660736
CASP7	caspase 7	XM_003515184.1	P55210	Cell Fate	755	24.1019	1179	59.1758	704	55.462	2.30114	1.20235	0.937241	-0.0935085
LAMB2	laminin subunit beta 2	XM_003512160.1	P55268	Cell Fate	5846	82.5868	6864	152.46	4927	171.772	2.0799	1.05651	1.12667	0.172068
SRPK2	SRSF protein kinase 2	XM_003502263.1	P78362	Cell Fate	1123	26.3672	1522	56.1856	1203	69.7057	2.64365	1.40253	1.24063	0.311076
BTG2	protein BTG2	XM_003505756.1	P78543	Cell Fate	452	54.2083	198	37.3352	765	226.416	4.17677	2.06239	6.06441	2.60037
COL7A1	collagen type VII alpha 1	XM_003504237.1	Q02388	Cell Fate	4722	40.658	7129	96.5106	7077	150.379	3.69863	1.88699	1.55816	0.639846
KMT2A	lysine methyltransferase 2A	XM_003510519.1	Q03164	Cell Fate	5119	34.4558	8457	89.4992	5261	87.3903	2.5363	1.34273	0.976437	-0.0344011
PPID	peptidylprolyl isomerase D	XM_003500206.1	Q08752	Cell Fate	118	25.1671	300	100.6	179	94.2155	3.7436	1.90443	0.936535	-0.0945951
MAPK7	mitogen-activated protein kinase 7	XM_003496359.1	Q13164	Cell Fate	310	9.51508	571	27.5558	314	23.7847	2.49969	1.32175	0.863149	-0.212318
BIRC3	baculoviral IAP repeat containing 3	XM_003496147.1	Q13489	Cell Fate	1142.5	29.512	752	30.5411	2047.5	130.522	4.42268	2.14492	4.27364	2.09547
FASTK	Fas activated serine/threonine kinase	XM_003501296.1	Q14296	Cell Fate	661	31.3851	1153	86.075	655	76.7505	2.44544	1.2901	0.89167	-0.165418
ANKRD1	ankyrin repeat domain 1	NM_001246706.1	Q15327	Cell Fate	784	46.4827	960	89.4895	979	143.244	3.08166	1.62371	1.60068	0.678682
HERC1	HECT and RLD domain containing E3 ubiquitin protein ligase family member 1	XM_003499340.1	Q15751	Cell Fate	3114	16.3205	5564	45.8487	3152	40.7679	2.49796	1.32075	0.889183	-0.169447
KIAA1109	KIAA1109	XM_003506766.1	Q2LD37	Cell Fate	426	8.33142	1039.5	31.9639	605	29.2	3.5048	1.80933	0.913531	-0.130475
KIAA1109	KIAA1109	XM_003506765.1	Q2LD37	Cell Fate	434	8.71465	1007.5	31.8076	583	28.89	3.3151	1.72905	0.908272	-0.138804
KIAA1109	KIAA1109	XM_003512202.1	Q2LD37	Cell Fate	2356	16.2164	3115	33.7103	2026	34.4141	2.12218	1.08555	1.02088	0.0298099
EAPP	E2F associated phosphoprotein	XM_003515386.1	Q56P03	Cell Fate	484	32.368	721	75.811	467	77.0736	2.38117	1.25167	1.01666	0.0238311
ZC3H12A	zinc finger CCCH-type containing 12A	XM_003502249.1	Q5D1E8	Cell Fate	689	23.6604	1464	79.0442	1420	120.34	5.08613	2.34657	1.52244	0.606383
ZCCHC11	zinc finger CCHC-type containing 11	XM_003496506.1	Q5TAX3	Cell Fate	2864	39.8816	3745	81.9931	3446	118.422	2.96934	1.57014	1.44429	0.530365
RIF1	replication timing regulatory factor 1	XM_003512957.1	Q5UIP0	Cell Fate	3986	43.633	6080	104.642	3864	104.384	2.39231	1.25841	0.99753	-0.00356838
USPL1	ubiquitin specific peptidase like 1	XM_003496647.1	Q5W0Q7	Cell Fate	1122	24.7668	1485	51.5382	1283	69.8911	2.82197	1.4967	1.3561	0.439466
E4F1	E4F transcription factor 1	XM_003509527.1	Q66K89	Cell Fate	653	33.3964	1746	140.397	1405	177.33	5.30984	2.40867	1.26306	0.336924
NAA16	N(alpha)-acetyltransferase 16, NatA auxiliary subunit	XM_003503091.1	Q6N069	Cell Fate	416	8.58701	1519	49.2983	1138	57.9708	6.75098	2.7551	1.17592	0.233787
NEPRO	chromosome 3 open reading frame 17	XM_003497878.1	Q6NW34	Cell Fate	675	26.0728	1009	61.2776	650	61.9606	2.37644	1.2488	1.01115	0.0159933
ADAMTSL4	ADAMTS like 4	XM_003498648.1	Q6UY14	Cell Fate	586	12.5662	1164	39.245	663	35.0862	2.79212	1.48136	0.894031	-0.161602
TTLL7	tubulin tyrosine ligase like 7	XM_003504841.1	Q6ZT98	Cell Fate	137	4.05825	135	6.2875	133	9.72273	2.39579	1.2605	1.54636	0.628875
RSRC2	arginine/serine-rich coiled-coil 2	XM_003498449.1	Q7L4I2	Cell Fate	1042	63.4967	1537	147.259	1171	176.099	2.77337	1.47164	1.19585	0.258032
HERC6	HECT and RLD domain containing E3 ubiquitin protein ligase family member 6	XM_003504898.1	Q8IVU3	Cell Fate	107.333	2.68806	297.333	11.7078	174.333	10.7746	4.00833	2.003	0.920299	-0.119825
CCAR1	cell division cycle and apoptosis regulator 1	XM_003499897.1	Q8IX12	Cell Fate	2876	52.1738	3515	100.257	2591	115.998	2.22329	1.1527	1.157	0.210392
SMC5	structural maintenance of chromosomes 5	XM_003513527.1	Q8IY18	Cell Fate	2371	57.0963	4391	166.252	3771	224.105	3.92503	1.9727	1.34799	0.430805
KMT2E	lysine methyltransferase 2E	XM_003502257.1	Q8IZD2	Cell Fate	2143	30.1502	4691	103.767	3153	109.474	3.63095	1.86035	1.055	0.0772375
AGGF1	angiogenic factor with G-patch and FHA domains 1	XM_003498706.1	Q8N302	Cell Fate	1807	51.0735	2271	100.921	1658	115.649	2.26435	1.1791	1.14593	0.196524
APPL2	adaptor protein, phosphotyrosine interaction, PH domain and leucine zipper containing 2	XM_003508577.1	Q8NEU8	Cell Fate	321	8.90694	972	42.4048	650	44.5097	4.9972	2.32112	1.04964	0.0698913
DDX55	DEAD-box helicase 55	XM_003507815.1	Q8NHQ9	Cell Fate	942	38.6366	1512	97.5047	943	95.4504	2.47047	1.30478	0.978931	-0.0307206
CCHCR1	coiled-coil alpha-helical rod protein 1	XM_003505861.1	Q8TD31	Cell Fate	591	17.828	2054	97.4185	1051	78.2413	4.38867	2.13378	0.803146	-0.316266
PHIP	pleckstrin homology domain interacting protein	XM_003506709.1	Q8WWQ0	Cell Fate	2390	25.35	4760	79.3803	3225	84.4166	3.33004	1.73554	1.06345	0.0887454
TNFRSF25	tumor necrosis factor receptor superfamily member 25	XM_003514969.1	Q93038	Cell Fate	112	7.77339	452	49.3238	202	34.5989	4.45094	2.15411	0.701464	-0.51156
GNL3	G protein nucleolar 3	XM_003495282.1	Q9BVP2	Cell Fate	2322.5	99.2835	3265.5	219.481	2474.5	261.052	2.62936	1.39471	1.18941	0.250241
GGNBP2	gametogenetin binding protein 2	XM_003500727.1	Q9H3C7	Cell Fate	774.5	25.4026	1245	64.2026	903.5	73.1313	2.87889	1.52551	1.13907	0.187859
GGNBP2	gametogenetin binding protein 2	XM_003500726.1	Q9H3C7	Cell Fate	861.5	25.6641	1377	64.4957	983.5	72.3042	2.81733	1.49433	1.12107	0.164876
PLEKHG2	pleckstrin homology and RhoGEF domain containing G2	XM_003503823.1	Q9H7P9	Cell Fate	1480	28.6467	3415	103.927	1487	71.0299	2.47952	1.31006	0.683459	-0.549073
PDF	peptide deformylase (mitochondrial)	XM_003508692.1	Q9HBH1	Cell Fate	264	11.8573	433	30.577	246	27.2668	2.29958	1.20137	0.891743	-0.165301
SRA1	steroid receptor RNA activator 1	XM_003510350.1	Q9HD15	Cell Fate	734	62.2156	1329	177.114	1081	226.124	3.63453	1.86177	1.27671	0.352433
SLTM	SAFB like transcription modulator	XM_003495065.1	Q9NWH9	Cell Fate	3276	67.4287	3846	124.462	2944	149.54	2.21775	1.14909	1.20149	0.264827
BCLAF1	BCL2 associated transcription factor 1	XM_003496548.1	Q9NYF8	Cell Fate	4376	54.1774	4886	95.1087	3619.5	110.588	2.04122	1.02943	1.16275	0.217544
IP6K2	inositol hexakisphosphate kinase 2	XM_003504233.1	Q9UHH9	Cell Fate	665	28.8815	1033	70.5382	620	66.452	2.30085	1.20217	0.942071	-0.0860923
BCAP29	B-cell receptor-associated protein 29	XM_003511111.1	Q9UHQ4	Cell Fate	6306.28	168.696	12926.4	543.667	10659.3	703.683	4.17131	2.0605	1.29433	0.372202
CASP8AP2	caspase 8 associated protein 2	XM_003495460.1	Q9UKL3	Cell Fate	936	13.3738	2245	50.4336	1452	51.1991	3.82833	1.93671	1.01518	0.0217339
SBNO2	strawberry notch homolog 2 (Drosophila)	XM_003502564.1	Q9Y2G9	Cell Fate	6271	106.469	11280	301.108	6000	251.395	2.3612	1.23952	0.8349	-0.260325
PTRH2	peptidyl-tRNA hydrolase 2	XM_003503815.1	Q9Y3E5	Cell Fate	648.015	30.75	1180.44	88.0703	695.522	81.4497	2.64877	1.40532	0.924826	-0.112746
PRRC2C	proline rich coiled-coil 2C	XM_003505523.1	Q9Y520	Cell Fate	13711	109.38	15484	194.213	11421	224.849	2.05567	1.03961	1.15775	0.211319
CXCL2	C-X-C motif chemokine ligand 2	NM_001244044.1	P19875	Signal Transduction	675	56.248	664	86.9955	1477	303.74	5.40001	2.43296	3.49144	1.80382
SENP7	SUMO1/sentrin specific peptidase 7	XM_003506431.1	Q9BQF6	Signal Transduction	424	7.053	786	20.5568	360	14.7784	2.09534	1.06719	0.718906	-0.476125
OR5G3	Olfactory receptor 5G3;OR5G3;ortholog	XM_003506010.1	P0C626	Signal Transduction	275	12.3023	652	45.8593	404	44.6019	3.62549	1.85818	0.972582	-0.0401088
DLGAP1	discs large homolog associated protein 1	XM_003506793.1	O14490	Signal Transduction	166	5.2336	167	8.27817	151	11.7486	2.24485	1.16662	1.41923	0.505108
PSTPIP1	proline-serine-threonine phosphatase interacting protein 1	XM_003497931.1	O43586	Signal Transduction	614	34.0979	1347	117.612	1021	139.927	4.1037	2.03692	1.18974	0.250641
DENND4B	DENN domain containing 4B	XM_003501630.1	O75064	Signal Transduction	813	12.239	1449	34.2965	787	29.2381	2.38892	1.25636	0.852508	-0.230214
SLIT1	slit guidance ligand 1	XM_003497750.1	O75093	Signal Transduction	123.755	1.8846	372.631	8.92195	218.814	8.22335	4.36344	2.12547	0.921698	-0.117633
PPFIA3	PTPRF interacting protein alpha 3	XM_003508641.1	O75145	Signal Transduction	140.5	2.41503	328.483	8.87738	179.5	7.61427	3.15287	1.65667	0.857716	-0.221428
NPHP4	nephronophthisis 4	XM_003508794.1	O75161	Signal Transduction	691	16.2001	1313	48.3982	699	40.4421	2.49642	1.31986	0.835612	-0.259095
PLEKHG5	pleckstrin homology and RhoGEF domain containing G5	XM_003514970.1	O94827	Signal Transduction	1875	46.8387	3428	134.639	2105	129.77	2.77057	1.47018	0.963837	-0.053139
ITGA2B	integrin subunit alpha 2b	XM_003504524.1	P08514	Signal Transduction	153	4.19667	332	14.3178	151	10.2213	2.43559	1.28427	0.71389	-0.486227
FER	FER tyrosine kinase	XM_003499363.1	P16591	Signal Transduction	147.667	4.60408	407.333	19.9681	180.333	13.8757	3.01378	1.59157	0.694894	-0.525136
FER	FER tyrosine kinase	XM_003499362.1	P16591	Signal Transduction	184.167	4.91155	443.333	18.5893	199.333	13.1192	2.67108	1.41742	0.705735	-0.502801
DGKA	diacylglycerol kinase alpha	XM_003506199.1	P23743	Signal Transduction	2341	78.6116	2139	112.933	2220	183.974	2.34029	1.22669	1.62905	0.704031
INPP5B	inositol polyphosphate-5-phosphatase B	XM_003502241.1	P32019	Signal Transduction	1296	28.0582	2504	85.2345	1336	71.3806	2.54401	1.34711	0.837461	-0.255907
ARHGAP25	Rho GTPase activating protein 25	XM_003503567.1	P42331	Signal Transduction	1022	33.5064	7762	400.107	5178	418.945	12.5034	3.64425	1.04708	0.0663744
LPAR6	lysophosphatidic acid receptor 6	XM_003506075.1	P43657	Signal Transduction	406	17.6038	570	38.8582	611	65.3794	3.71393	1.89295	1.68251	0.750618
EFNB2	ephrin-B2	XM_003495761.1	P52799	Signal Transduction	743	57.995	985	120.883	755	145.434	2.5077	1.32637	1.2031	0.266761
GSDMD	gasdermin D	XM_003510435.1	P57764	Signal Transduction	221	11.937	442	37.5362	258	34.3907	2.88101	1.52658	0.916199	-0.126267
GAD2	glutamate decarboxylase 2	XM_003511487.1	Q05329	Signal Transduction	105	2.45074	478	17.5413	329	18.9505	7.73258	2.95095	1.08034	0.111485
MAP4K2	mitogen-activated protein kinase kinase kinase kinase 2	XM_003510723.1	Q12851	Signal Transduction	309	10.4475	806	42.8463	396	33.0419	3.16268	1.66115	0.771174	-0.374872
CACNA1C	calcium voltage-gated channel subunit alpha1 C	XM_003500328.1	Q13936	Signal Transduction	570	9.14617	1375	34.6891	606	23.9969	2.62371	1.39161	0.691771	-0.531634
GRB14	growth factor receptor bound protein 14	XM_003506414.1	Q14449	Signal Transduction	394	16.0932	657	42.1927	399	40.2195	2.49916	1.32145	0.953235	-0.0690968
STK38	serine/threonine kinase 38	XM_003504144.1	Q15208	Signal Transduction	1283	42.2564	2044	105.846	1285	104.445	2.47169	1.3055	0.986767	-0.019219
TRIP10	thyroid hormone receptor interactor 10	XM_003501778.1	Q15642	Signal Transduction	1196	44.062	1562.5	90.5064	1118.5	101.692	2.30793	1.2066	1.12359	0.168117
TRIP10	thyroid hormone receptor interactor 10	XM_003501779.1	Q15642	Signal Transduction	1209	47.895	1483.5	92.4011	1031.5	100.844	2.10553	1.07418	1.09137	0.126147
GKAP1	G kinase anchoring protein 1	XM_003512040.1	Q5VSY0	Signal Transduction	226	16.1545	409.5	46.0218	339	59.8001	3.70177	1.88821	1.29939	0.37783
GKAP1	G kinase anchoring protein 1	XM_003512041.1	Q5VSY0	Signal Transduction	150	12.447	302.5	39.466	251	51.4001	4.12953	2.04598	1.30239	0.38116
NSMF	NMDA receptor synaptonuclear signaling and neuronal migration factor	XM_003510564.1	Q6X4W1	Signal Transduction	688.833	21.1019	931.667	44.8739	626.75	47.3827	2.24542	1.16699	1.05591	0.0784841
NSMF	NMDA receptor synaptonuclear signaling and neuronal migration factor	XM_003510565.1	Q6X4W1	Signal Transduction	719.167	21.5052	964.333	45.3384	647.583	47.7889	2.22221	1.15199	1.05405	0.0759418
NSMF	NMDA receptor synaptonuclear signaling and neuronal migration factor	XM_003510563.1	Q6X4W1	Signal Transduction	726.167	21.6652	969.333	45.4701	649.083	47.791	2.20588	1.14136	1.05104	0.0718187
NEK8	NIMA related kinase 8	XM_003513831.1	Q86SG6	Signal Transduction	344	12.9453	601	35.5594	400	37.1478	2.86959	1.52084	1.04467	0.0630429
TPRA1	transmembrane protein adipocyte associated 1	XM_003500223.1	Q86W33	Signal Transduction	435	23.7561	573	49.2	450	60.6479	2.55294	1.35216	1.23268	0.301798
MAP4K3	mitogen-activated protein kinase kinase kinase kinase 3	XM_003508461.1	Q8IVH8	Signal Transduction	1486	25.8295	2599	71.0279	1390	59.6252	2.30842	1.2069	0.839462	-0.252464
DOCK3	dedicator of cytokinesis 3	XM_003500374.1	Q8IZD9	Signal Transduction	1592	14.5053	3387	48.5206	2127	47.8267	3.29718	1.72123	0.9857	-0.0207801
PLCD3	phospholipase C delta 3	XM_003504513.1	Q8N3E9	Signal Transduction	624	17.5614	1498	66.2846	885	61.4662	3.50007	1.80738	0.927307	-0.10888
SLC38A9	solute carrier family 38 member 9	XM_003503434.1	Q8NBW4	Signal Transduction	220	9.11819	317	20.6572	237	24.2411	2.65854	1.41064	1.1735	0.230812
NPRL2	NPR2-like, GATOR1 complex subunit	XM_003500398.1	Q8WTW4	Signal Transduction	258	13.9546	699	59.443	491	65.5386	4.69656	2.2316	1.10255	0.140838
SYN2	synapsin II	XM_003507305.1	Q92777	Signal Transduction	709	25.5946	1504	85.3643	926	82.4958	3.22317	1.68848	0.966397	-0.0493126
MIB2	mindbomb E3 ubiquitin protein ligase 2	XM_003509828.1	Q96AX9	Signal Transduction	2381	67.9298	1862	83.523	2081	146.518	2.1569	1.10896	1.75422	0.810832
DOCK6	dedicator of cytokinesis 6	XM_003499766.1	Q96HP0	Signal Transduction	204	2.55045	298	5.85771	189	5.83131	2.28639	1.19307	0.995492	-0.00651825
TMEM237	transmembrane protein 237	XM_003497407.1	Q96Q45	Signal Transduction	137	6.13923	393	27.6893	159	17.5836	2.86414	1.5181	0.635034	-0.655095
HBEGF	heparin binding EGF like growth factor	XM_003510359.1	Q99075	Signal Transduction	408	33.8914	593	77.4479	525	107.623	3.17554	1.667	1.38962	0.474693
SHARPIN	SHANK associated RH domain interactor	XM_003507672.1	Q9H0F6	Signal Transduction	578.701	20.6453	1139.33	63.9062	655.39	57.7013	2.79488	1.48279	0.902906	-0.147353
EXOC1	exocyst complex component 1	XM_003513620.1	Q9NV70	Signal Transduction	1449	34.5874	2301	86.356	1449	85.3565	2.46785	1.30325	0.988426	-0.0167955
NCKIPSD	NCK interacting protein with SH3 domain	XM_003504234.1	Q9NZQ3	Signal Transduction	377	10.8184	871	39.2974	528	37.3914	3.45629	1.78923	0.951498	-0.0717269
GMIP	GEM interacting protein	XM_003499160.1	Q9P107	Signal Transduction	650	17.5724	1402	59.5926	602	40.1637	2.28561	1.19258	0.67397	-0.569243
GABBR1	gamma-aminobutyric acid type B receptor subunit 1	XM_003507407.1	Q9UBS5	Signal Transduction	319.5	8.74539	1106	47.5981	619	41.8135	4.78121	2.25738	0.878472	-0.186932
GABBR1	gamma-aminobutyric acid type B receptor subunit 1	XM_003507408.1	Q9UBS5	Signal Transduction	312.5	9.1437	1102	50.6967	615	44.4084	4.85672	2.27998	0.875963	-0.191058
PLXNB3	plexin B3	XM_003506552.1	Q9ULL4	Signal Transduction	144	1.98421	203	4.39792	130	4.42066	2.22792	1.1557	1.00517	0.00743974
PLEKHN1	pleckstrin homology domain containing N1	XM_003514608.1	Q494U1	Signal Transduction	152	6.20533	1217	78.1155	383	38.5867	6.21832	2.63653	0.49397	-1.01751
RUFY2	RUN and FYVE domain containing 2	XM_003501007.1	Q8WXA3	Signal Transduction	153	5.88392	699	42.2648	521	49.446	8.40358	3.071	1.16991	0.226399
MCF2L	MCF.2 cell line derived transforming sequence like	XM_003504090.1	O15068	Signal Transduction	122.333	2.80063	205.5	7.39689	103.5	5.8475	2.08792	1.06207	0.790534	-0.3391
MCF2L	MCF.2 cell line derived transforming sequence like	XM_003504089.1	O15068	Signal Transduction	121.333	2.66933	198	6.84877	102.5	5.56498	2.08479	1.0599	0.812552	-0.299469
MCF2L	MCF.2 cell line derived transforming sequence like	XM_003504088.1	O15068	Signal Transduction	128.333	2.94654	211.5	7.63501	106	6.00617	2.03838	1.02742	0.786661	-0.346186
CFH	complement factor H	XM_003514717.1	P08603	Signal Transduction	280	9.1343	378	19.3881	241	19.4023	2.12411	1.08686	1.00073	0.00105476
RUFY3	RUN and FYVE domain containing 3	XM_003510049.1	Q7L099	Signal Transduction	314.083	8.81733	537.176	23.7102	261.4	18.1099	2.0539	1.03836	0.763803	-0.388728
RTKN	rhotekin	XM_003511138.1	Q9BST9	Signal Transduction	243	11.2933	412	30.105	213	24.4294	2.16317	1.11315	0.811474	-0.301383
TCF7L2	transcription factor 7 like 2	XM_003512094.1	Q9NQB0	Signal Transduction	337.5	7.8611	506.5	18.5488	296	17.0145	2.16439	1.11396	0.917286	-0.124557
COX16	COX16 cytochrome c oxidase assembly homolog	XM_003498260.1	Q9P0S2	Signal Transduction	397.658	44.8937	497.047	88.2265	349.856	97.4726	2.17119	1.11848	1.1048	0.143786
ADAMTS7	ADAM metallopeptidase with thrombospondin type 1 motif 7	XM_003495618.1	Q9UKP4	Signal Transduction	1728.5	26.6307	3260.5	78.9811	1528.5	58.1162	2.1823	1.12585	0.735823	-0.442569
OR1E1	Olfactory receptor 1E1;OR1E1;ortholog	XM_003511641.1	P30953	Signal Transduction	1039.77	38.522	3396.68	197.858	1677.4	153.366	3.98124	1.99322	0.775129	-0.367492
ZFYVE1	zinc finger FYVE-type containing 1	XM_003505119.1	Q9HBF4	Signal Transduction	114	3.8544	170	9.03705	133	11.0974	2.87915	1.52564	1.22799	0.296299
CHD2	chromodomain helicase DNA binding protein 2	XM_003495273.1	O14647	DNA Processing	1568	20.4321	2809	57.5499	1945	62.5467	3.0612	1.6141	1.08683	0.120121
FANCA	Fanconi anemia complementation group A	XM_003495074.1	O15360	DNA Processing	1940	28.1524	3566.5	81.3733	2093.5	74.973	2.66311	1.41311	0.921347	-0.118184
PHF1	PHD finger protein 1	XM_003510828.1	O43189	DNA Processing	210	9.69117	663	48.1057	237	26.9913	2.78514	1.47775	0.561083	-0.833714
REV3L	REV3 like, DNA directed polymerase zeta catalytic subunit	XM_003504916.1	O60673	DNA Processing	2530	19.264	6971	83.4539	4256	79.9733	4.15144	2.05361	0.958294	-0.0614596
KIN	Kin17 DNA and RNA binding protein	XM_003494924.1	O60870	DNA Processing	274	14.0954	503	40.6838	319	40.4983	2.87315	1.52263	0.99544	-0.00659413
RECQL4	RecQ like helicase 4	XM_003507633.1	O94761	DNA Processing	1429	29.5126	2384	77.4119	1746	88.9894	3.0153	1.5923	1.14956	0.201077
MBD4	methyl-CpG binding domain 4 DNA glycosylase	XM_003507354.1	O95243	DNA Processing	836.317	20.1825	1512.48	57.3881	1142.72	68.0553	3.37199	1.7536	1.18588	0.245956
XRCC1	X-ray repair complementing defective repair in Chinese hamster cells 1	NM_001246679.1	P18887	DNA Processing	1553	64.4338	2279	148.666	1698	173.859	2.69826	1.43203	1.16946	0.225843
XPA	xeroderma pigmentosum, complementation group A	XM_003500090.1	P23025	DNA Processing	202	11.1629	356	30.9315	215	29.3212	2.62667	1.39323	0.94794	-0.0771327
ERCC5	excision repair cross-complementation group 5	XM_003512995.1	P28715	DNA Processing	1151	25.3998	2667	92.5346	1467	79.8921	3.14538	1.65323	0.863375	-0.211941
RAD52	RAD52 homolog, DNA repair protein	NM_001246764.1	P43351	DNA Processing	512	32.1431	1108	109.366	560	86.7608	2.69921	1.43254	0.793306	-0.334051
PMS1	PMS1 homolog 1, mismatch repair system component	XM_003513713.1	P54277	DNA Processing	568	17.5295	453	21.9809	503	38.3097	2.18543	1.12792	1.74286	0.801455
POLE2	polymerase (DNA) epsilon 2, accessory subunit	XM_003513997.1	P56282	DNA Processing	585	26.9968	1138	82.5705	704	80.1766	2.96985	1.57039	0.971008	-0.0424454
RAD51	RAD51 recombinase	NM_001246757.1	Q06609	DNA Processing	903	69.8619	1424	173.216	1411	269.4	3.85618	1.94717	1.55528	0.637177
TOP3A	topoisomerase (DNA) III alpha	XM_003496327.1	Q13472	DNA Processing	756	18.7665	1364	53.2356	813	49.8048	2.65391	1.40812	0.935553	-0.0961085
ALKBH1	alkB homolog 1, histone H2A dioxygenase	XM_003499660.1	Q13686	DNA Processing	442.5	9.67563	996	34.2414	423	22.8257	2.35909	1.23823	0.666612	-0.58508
ALKBH1	alkB homolog 1, histone H2A dioxygenase	XM_003499659.1	Q13686	DNA Processing	443.5	9.71365	997	34.3328	423	22.8637	2.35377	1.23498	0.665944	-0.586528
IKBKE	inhibitor of kappa light polypeptide gene enhancer in B-cells, kinase epsilon	XM_003501226.1	Q14164	DNA Processing	214	6.64603	427	20.8498	200	15.3284	2.3064	1.20564	0.735181	-0.443828
POLA2	polymerase (DNA) alpha 2, accessory subunit	XM_003514541.1	Q14181	DNA Processing	1027	34.664	1349	71.589	933	77.7156	2.24197	1.16477	1.08558	0.118466
MUM1	melanoma associated antigen (mutated) 1	XM_003502567.1	Q2TAK8	DNA Processing	1940	62.2835	4701	237.294	3267	258.844	4.1559	2.05516	1.09082	0.125407
CHD9	chromodomain helicase DNA binding protein 9	XM_003498009.1	Q3L8U1	DNA Processing	3015	20.6658	4014	43.2581	2814	47.6	2.30332	1.20372	1.10037	0.13799
ARID4B	AT-rich interaction domain 4B	XM_003506413.1	Q4LE39	DNA Processing	1623	22.1971	3267	70.2509	2652	89.5094	4.03249	2.01167	1.27414	0.349522
DCLRE1A	DNA cross-link repair 1A	XM_003512892.1	Q6PJP8	DNA Processing	923	18.2687	1451	45.1544	1284	62.7176	3.43306	1.7795	1.38896	0.474006
CDAN1	codanin 1	XM_003498042.1	Q8IWY9	DNA Processing	848	18.239	1673	56.5753	981	52.0706	2.8549	1.51344	0.920376	-0.119705
FANCB	Fanconi anemia complementation group B	XM_003503244.1	Q8NB91	DNA Processing	468	12.4938	1051	44.1141	551	36.301	2.90552	1.5388	0.822889	-0.281231
RNF169	ring finger protein 169	XM_003511693.1	Q8NCN4	DNA Processing	325	14.8163	484	34.6918	375	42.1896	2.84751	1.5097	1.21612	0.282291
KMT2C	lysine methyltransferase 2C	XM_003501314.1	Q8NEZ4	DNA Processing	3750.5	17.9493	5908.88	44.462	3128	36.944	2.05824	1.04141	0.83091	-0.267235
RAD50	RAD50 double strand break repair protein	XM_003498479.1	Q92878	DNA Processing	1582	30.7719	2598	79.4535	1748	83.9088	2.7268	1.44721	1.05607	0.0787116
TOP1MT	topoisomerase (DNA) I, mitochondrial	XM_003510444.1	Q969P6	DNA Processing	409	23.6452	658	59.8097	427	60.9209	2.57646	1.36539	1.01858	0.0265563
TONSL	tonsoku-like, DNA repair protein	XM_003507655.1	Q96HA7	DNA Processing	1230	23.3495	3159	94.2862	1522	71.3026	3.05371	1.61056	0.756236	-0.403092
MUS81	MUS81 structure-specific endonuclease subunit	XM_003509454.1	Q96NY9	DNA Processing	223	13.454	446	42.3064	258	38.4134	2.85518	1.51358	0.907982	-0.139265
ATAD5	ATPase family, AAA domain containing 5	XM_003495816.1	Q96QE3	DNA Processing	1321	18.7829	1841	41.1566	1385	48.599	2.58741	1.37151	1.18083	0.239804
PNKP	polynucleotide kinase 3'-phosphatase	XM_003510879.1	Q96T60	DNA Processing	526	26.4555	1134	89.6745	649	80.555	3.04493	1.60641	0.898305	-0.154722
TINF2	TERF1 (TRF1)-interacting nuclear factor 2	XM_003502089.1	Q9BSI4	DNA Processing	532	31.8046	967	90.8932	684	100.914	3.17294	1.66582	1.11025	0.150888
C9orf142	chromosome 9 open reading frame 142	XM_003515490.1	Q9BUH6	DNA Processing	110	11.8263	142	24.0033	119	31.5734	2.66976	1.41671	1.31538	0.395478
WRAP53	WD repeat containing, antisense to TP53	XM_003497237.1	Q9BUR4	DNA Processing	168	10.623	258	25.6498	188	29.3369	2.76164	1.46552	1.14375	0.193769
SMARCAD1	SWI/SNF-related, matrix-associated actin-dependent regulator of chromatin, subfamily a, containing DEAD/H box 1	XM_003498896.1	Q9H4L7	DNA Processing	750.5	12.4213	1414.5	36.8083	891.5	36.413	2.93149	1.55164	0.98926	-0.0155776
SMARCAD1	SWI/SNF-related, matrix-associated actin-dependent regulator of chromatin, subfamily a, containing DEAD/H box 1	XM_003498897.1	Q9H4L7	DNA Processing	667.5	11.4511	1230.5	33.1896	746.5	31.6041	2.75992	1.46463	0.952227	-0.0706226
RMI1	RecQ mediated genome instability 1	XM_003512046.1	Q9H9A7	DNA Processing	738	25.2333	1372	73.7559	720	60.753	2.40765	1.26763	0.823703	-0.279804
POLM	polymerase (DNA) mu	XM_003504749.1	Q9NP87	DNA Processing	155	7.18241	347	25.281	189	21.6132	3.00918	1.58937	0.854918	-0.226142
MBIP	MAP3K12 binding inhibitory protein 1	XM_003515041.1	Q9NS73	DNA Processing	155	8.25347	297.5	24.9068	191	25.099	3.04102	1.60456	1.00772	0.0110908
TREX1	three prime repair exonuclease 1	XM_003504240.1	Q9NSU2	DNA Processing	124	9.39991	378	45.0526	169	31.616	3.36344	1.74994	0.701758	-0.510955
RTEL1	regulator of telomere elongation helicase 1	XM_003503136.1	Q9NZ71	DNA Processing	2361	45.9018	4847	148.161	3192	153.149	3.33645	1.73831	1.03367	0.0477764
POLK	polymerase (DNA) kappa	XM_003507995.1	Q9UBT6	DNA Processing	545	35.166	704	71.4208	488	77.7078	2.20974	1.14388	1.08803	0.121714
REV1	REV1, DNA directed polymerase	XM_003503330.1	Q9UBZ9	DNA Processing	1736	33.7757	3252	99.479	1930	92.6681	2.74363	1.45609	0.931535	-0.102319
MLH3	mutL homolog 3	XM_003502767.1	Q9UHC1	DNA Processing	224	3.32206	433	10.0966	218	7.97874	2.40174	1.26408	0.790243	-0.339631
POLG2	polymerase (DNA) gamma 2, accessory subunit	XM_003501876.1	Q9UHN1	DNA Processing	460.457	22.5973	1768.97	136.494	894.448	108.328	4.79384	2.26118	0.793644	-0.333436
MUTYH	mutY DNA glycosylase	XM_003497378.1	Q9UIF7	DNA Processing	232	11.804	910	72.7961	458	57.5075	4.87187	2.28448	0.78998	-0.340111
HEMK1	HemK methyltransferase family member 1	XM_003500393.1	Q9Y5R4	DNA Processing	166	9.61798	382	34.7989	212	30.3131	3.15171	1.65613	0.871093	-0.199101
HIST1H1E	histone cluster 1, H1e	XM_003502173.1	P10412	DNA Processing	111.667	13.7904	112.333	21.8115	175.833	53.5885	3.88594	1.95826	2.45689	1.29683
COL27A1	collagen type XXVII alpha 1	XM_003503450.1	Q8IZC6	Development	904	11.9735	3202	66.6806	1675	54.7501	4.57261	2.19302	0.821081	-0.284404
NTM	neurotrimin	XM_003495837.1	Q9P121	Development	234.757	8.67302	885.693	51.4471	508.381	46.351	5.34427	2.41799	0.900944	-0.15049
COL6A1	collagen type VI alpha 1	XM_003500557.1	P12109	Development	1271	25.1377	1293	40.2072	1135	55.398	2.20378	1.13998	1.37781	0.462378
WFIKKN1	WAP, follistatin/kazal, immunoglobulin, kunitz and netrin domain containing 1	XM_003501555.1	Q96NZ8	Development	182	8.22584	443	31.4803	326	36.3617	4.42043	2.14419	1.15506	0.207973
KRT7	keratin 7	XM_003514279.1	P08729	Development	180.5	13.6698	518	61.6795	245	45.7899	3.34971	1.74404	0.742384	-0.429763
ATXN7L2	ataxin 7 like 2	XM_003510963.1	Q5T6C5	Development	297	9.76151	694	35.8629	478	38.771	3.97182	1.9898	1.08109	0.112483
ATXN7L2	ataxin 7 like 2	XM_003510964.1	Q5T6C5	Development	292	9.67779	686	35.7473	469	38.3605	3.96377	1.98687	1.0731	0.101787
TCP11L1	t-complex 11, testis-specific-like 1	XM_003497433.1	Q9NUJ3	Development	2157.5	39.1034	5799.6	165.268	3240.42	144.939	3.70654	1.89007	0.876991	-0.189366
COL18A1	collagen type XVIII alpha 1	XM_003500592.1	P39060	Development	1148	19.3699	1345	35.6807	982	40.8898	2.111	1.07792	1.14599	0.196597
SYNE1	Nesprin-1;SYNE1;ortholog	XM_003495877.1	Q8NF91	Development	318	7.053	464.5	16.1979	292.5	16.01	2.26995	1.18266	0.988399	-0.0168341
CENPJ	Centromere protein J;CENPJ;ortholog	XM_003502035.1	Q9HC77	Development	249	4.71664	512	15.2486	401	18.7455	3.97432	1.99071	1.22932	0.297866
CENPJ	Centromere protein J;CENPJ;ortholog	XM_003502036.1	Q9HC77	Development	256	4.87381	517	15.4755	411	19.3103	3.96205	1.98625	1.2478	0.319382
ZFAND5	zinc finger AN1-type containing 5	XM_003513945.1	O76080	Development	1662	55.5035	2622	137.673	2373	195.571	3.52359	1.81704	1.42055	0.506452
RPGRIP1L	RPGRIP1-like	XM_003498013.1	Q68CZ1	Development	239	5.09053	472.5	15.8231	268.5	14.1133	2.77245	1.47116	0.891938	-0.164984
RPGRIP1L	RPGRIP1-like	XM_003498012.1	Q68CZ1	Development	254	5.27338	484.5	15.8152	276.5	14.1667	2.68645	1.4257	0.895764	-0.158809
ANKRD11	ankyrin repeat domain 11	XM_003495084.1	Q6UB99	Development	7929	71.2489	14206	200.704	8957	198.628	2.7878	1.47913	0.989653	-0.015005
CTTNBP2	cortactin binding protein 2	XM_003500782.1	Q8WZ74	Development	124	1.60336	175	3.55773	137	4.37168	2.72657	1.44709	1.22878	0.297229
POMK	protein-O-mannose kinase	XM_003498220.1	Q9H5K3	Development	230	10.9934	455	34.1935	350	41.285	3.75542	1.90897	1.20739	0.271896
ANKHD1	ankyrin repeat and KH domain containing 1	XM_003510360.1	Q8IWZ3	Immune Response	3255	34.3448	6713	111.366	4319	112.463	3.27454	1.71129	1.00985	0.0141475
ABCB1	ATP binding cassette subfamily B member 1	NM_001243989.1	P08183	Immune Response	1374.33	25.3397	2141	62.0657	1207.83	54.9584	2.16887	1.11694	0.885488	-0.175456
TRIM5	tripartite motif containing 5	XM_003513253.1	Q9C035	Immune Response	181.5	7.06604	362	22.1582	283	27.1897	3.84794	1.94408	1.22707	0.29522
ACP2	acid phosphatase 2, lysosomal	XM_003497305.1	P11117	Metabolism	680.85	24.8513	1427.54	81.9238	1059.82	95.4654	3.84147	1.94166	1.1653	0.220696
TXNRD2	thioredoxin reductase 2	XM_003502437.1	Q9NNW7	Metabolism	317	16.6438	746	61.5827	505	65.434	3.93143	1.97505	1.06254	0.0875156
ATG4D	autophagy related 4D cysteine peptidase	XM_003499732.1	Q86TL0	Metabolism	602.5	21.2257	1357	75.1641	803	69.8134	3.2891	1.71769	0.928812	-0.106541
PFKFB2	6-phosphofructo-2-kinase/fructose-2,6-bisphosphatase 2;PFKFB2;ortholog	XM_003497722.1	O60825	Metabolism	104.1	4.81249	211.8	15.3947	124.05	14.1525	2.94079	1.5562	0.919312	-0.121373
CDC25C	M-phase inducer phosphatase 3;CDC25C;ortholog	XM_003502519.1	P30307	Metabolism	161.833	9.35596	291.667	26.5114	194.5	27.7497	2.96599	1.56851	1.04671	0.0658575
CYP4A11	Cytochrome P450 4A11;CYP4A11;ortholog	XM_003497344.1	Q02928	Metabolism	229.5	11.8837	389.833	31.7375	258.833	33.0755	2.78327	1.47678	1.04216	0.0595738
CYP4A11	Cytochrome P450 4A11;CYP4A11;ortholog	XM_003497345.1	Q02928	Metabolism	744.5	15.8616	1199.83	40.191	780.833	41.0543	2.58828	1.372	1.02148	0.0306604
HIST2H2BF	Histone H2B type 2-F;HIST2H2BF;ortholog	XM_003502170.1	Q5QNW6	Metabolism	407.96	44.7134	288.148	49.6549	331.042	89.541	2.00255	1.00184	1.80326	0.850611
ZNF420	Zinc finger protein 420;ZNF420;ortholog	XM_003512780.1	Q8TAQ5	Metabolism	150.519	5.11323	465.937	24.8861	175.019	14.6726	2.86954	1.52082	0.589591	-0.762215
ZNF420	Zinc finger protein 420;ZNF420;ortholog	XM_003509399.1	Q8TAQ5	Metabolism	189.227	7.10064	878.169	51.8105	490.367	45.4101	6.39521	2.67699	0.876466	-0.19023
ZNF420	Zinc finger protein 420;ZNF420;ortholog	XM_003509400.1	Q8TAQ5	Metabolism	420.281	12.683	828.258	39.2982	415.271	30.9265	2.43843	1.28595	0.786971	-0.345618
PIGV	GPI mannosyltransferase 2;PIGV;ortholog	XM_003508299.1	Q9NUD9	Metabolism	315	13.7033	531.833	36.3762	338.667	36.3585	2.65326	1.40777	0.999515	-0.000700359
PIGV	GPI mannosyltransferase 2;PIGV;ortholog	XM_003508300.1	Q9NUD9	Metabolism	136	11.0871	275.833	35.3549	201.667	40.5723	3.65943	1.87162	1.14757	0.198584
APEX2	DNA-(apurinic or apyrimidinic site) lyase 2;APEX2;ortholog	XM_003500185.1	Q9UBZ4	Metabolism	855	37.0111	997	67.8558	710	75.8477	2.04932	1.03515	1.11778	0.160633
OR5V1	Olfactory receptor 5V1;OR5V1;ortholog	XM_003514462.1	Q9UGF6	Metabolism	191	9.42623	245	19.0106	247	30.0829	3.1914	1.67419	1.58243	0.662137
PROSC	proline synthetase co-transcribed homolog (bacterial)	XM_003498217.1	O94903	Metabolism	3144.2	110.818	6334.86	351.044	4719.35	410.487	3.70416	1.88915	1.16933	0.225684
ZMYM6	zinc finger MYM-type containing 6	XM_003500882.1	O95789	Metabolism	573	11.8619	1277	41.5639	1050	53.6423	4.52223	2.17703	1.2906	0.368039
FRA10AC1	fragile site, folic acid type, rare, fra(10)(q23.3) or fra(10)(q24.2) candidate 1	XM_003500710.1	Q70Z53	Metabolism	478	29.9134	677	66.612	488	75.366	2.51947	1.33312	1.13142	0.178133
ZCCHC7	zinc finger CCHC-type containing 7	XM_003504793.1	Q8N3Z6	Metabolism	231	9.73256	1013	67.1043	698	72.5753	7.45695	2.89859	1.08153	0.113073
THAP3	THAP domain containing, apoptosis associated protein 3	XM_003510215.1	Q8WTV1	Metabolism	647	43.8636	1285	136.971	897	150.076	3.42142	1.77459	1.09567	0.131819
CCNL2	cyclin L2	XM_003509972.1	Q96S94	Metabolism	1850	59.955	5572	283.917	4467	357.263	5.95885	2.57503	1.25834	0.331519
NME6	NME/NM23 nucleoside diphosphate kinase 6	XM_003504245.1	O75414	Metabolism	455.574	31.289	783.27	84.5805	395.407	67.0186	2.14192	1.09891	0.792365	-0.335763
DGAT1	diacylglycerol O-acyltransferase 1	XM_003507638.1	O75907	Metabolism	745	26.3754	872	48.5384	649	56.7029	2.14984	1.10423	1.16821	0.224298
POLA1	polymerase (DNA) alpha 1, catalytic subunit	XM_003508207.1	P09884	Metabolism	2371	35.3094	2217	51.9099	1928.5	70.8756	2.00727	1.00524	1.36536	0.449278
PDE4A	phosphodiesterase 4A	XM_003499736.1	P27815	Metabolism	160	6.87702	277.5	18.7529	140	14.85	2.15937	1.11061	0.791876	-0.336653
HMGCL	3-hydroxymethyl-3-methylglutaryl-CoA lyase	XM_003515971.1	P35914	Metabolism	150.5	17.2124	235	42.2569	125	35.2803	2.04971	1.03542	0.8349	-0.260325
RECQL	RecQ like helicase	XM_003503165.1	P46063	Metabolism	1136	45.4364	1624	102.126	950	93.7708	2.06378	1.04529	0.918184	-0.123144
NOP14	NOP14 nucleolar protein	XM_003508839.1	P78316	Metabolism	2298	67.0899	2599	119.3	1959	141.143	2.10379	1.07299	1.1831	0.242569
ZNF45	zinc finger protein 45	XM_003508356.1	Q02386	Metabolism	138	4.88565	170	9.46275	115	10.0475	2.05654	1.04022	1.0618	0.086507
PARP10	poly(ADP-ribose) polymerase family member 10	XM_003507641.1	Q53GL7	Metabolism	479	13.0299	601	25.7043	395	26.5168	2.03507	1.02508	1.03161	0.0448955
RARS2	arginyl-tRNA synthetase 2, mitochondrial	XM_003503773.1	Q5T160	Metabolism	352	15.432	497	34.258	288	31.1595	2.01915	1.01375	0.909554	-0.136769
CERCAM	cerebral endothelial cell adhesion molecule	XM_003511792.1	Q5T4B2	Metabolism	306	10.4309	445	23.85	273	22.9659	2.20171	1.13862	0.96293	-0.0544965
PKN3	protein kinase N3	XM_003514661.1	Q6P5Z2	Metabolism	1129	33.7093	1590	74.6412	963	70.9578	2.10499	1.07381	0.950652	-0.0730112
NFXL1	nuclear transcription factor, X-box binding like 1	XM_003515277.1	Q6ZNB6	Metabolism	1117	24.1299	1384	47.0073	993	52.9384	2.19389	1.13349	1.12617	0.17143
FUNDC1	FUN14 domain containing 1	XM_003507539.1	Q8IVP5	Metabolism	1107.83	40.6242	1612.81	92.9864	956.561	86.5648	2.13087	1.09144	0.93094	-0.103239
PUSL1	pseudouridylate synthase-like 1	XM_003509966.1	Q8N0Z8	Metabolism	333	24.1085	501	57.0282	283	50.5628	2.0973	1.06853	0.886627	-0.173601
ATP11C	ATPase phospholipid transporting 11C	XM_003501279.1	Q8NB49	Metabolism	695	16.1357	1069	39.0216	618	35.4086	2.19443	1.13385	0.907409	-0.140175
KIF18A	kinesin family member 18A	XM_003510958.1	Q8NI77	Metabolism	382	10.2709	462.5	19.5516	334.5	22.1952	2.16098	1.11169	1.13521	0.182961
KIF18A	kinesin family member 18A	XM_003510957.1	Q8NI77	Metabolism	471	11.3146	588.5	22.2275	402.5	23.8617	2.10893	1.07651	1.07352	0.102354
RB1CC1	RB1 inducible coiled-coil 1	XM_003512409.1	Q8TDY2	Metabolism	1387	20.9761	1508	35.8572	1186	44.2641	2.11021	1.07739	1.23446	0.303875
DCAF4	DDB1 and CUL4 associated factor 4	XM_003505141.1	Q8WV16	Metabolism	638	32.9712	975	79.2217	539	68.7418	2.0849	1.05998	0.867714	-0.204709
HSD17B8	hydroxysteroid (17-beta) dehydrogenase 8	XM_003505898.1	Q92506	Metabolism	530	43.1178	587	75.0836	459	92.1535	2.13725	1.09575	1.22735	0.295541
PHF21A	PHD finger protein 21A	XM_003497288.1	Q96BD5	Metabolism	902	22.4827	1070.83	41.9652	755.625	46.48	2.06737	1.0478	1.10758	0.147416
DUS3L	dihydrouridine synthase 3 like	XM_003501761.1	Q96G46	Metabolism	1403	56.1725	2000	125.899	1183	116.888	2.08087	1.05719	0.928425	-0.107142
MCCC1	methylcrotonoyl-CoA carboxylase 1	XM_003511025.1	Q96RQ3	Metabolism	474	13.8949	629	28.9904	404	29.2265	2.1034	1.07272	1.00814	0.0117031
ZNF717	zinc finger protein 717	XM_003505906.1	Q9BY31	Metabolism	511	15.263	637	29.9147	420	30.959	2.02837	1.02032	1.03491	0.0495038
ITPA	inosine triphosphatase	XM_003499032.1	Q9BY32	Metabolism	382.667	28.7597	438.617	51.8292	315.417	58.5014	2.03415	1.02442	1.12873	0.174706
HSD3B7	hydroxy-delta-5-steroid dehydrogenase, 3 beta- and steroid delta-isomerase 7	XM_003510980.1	Q9H2F3	Metabolism	191	12.2741	227	22.9354	164	26.0086	2.11899	1.08338	1.13399	0.181411
POLR1B	polymerase (RNA) I subunit B	XM_003497792.1	Q9H9Y6	Metabolism	814.233	16.6591	1177.5	37.8783	694.45	35.0641	2.1048	1.07368	0.925704	-0.111376
DDX18	DEAD-box helicase 18	XM_003499439.1	Q9NVP1	Metabolism	2523	77.531	2791	134.848	2056	155.919	2.01105	1.00795	1.15626	0.209466
STARD9	StAR related lipid transfer domain containing 9	XM_003498083.1	Q9P2P6	Metabolism	462	2.52428	1187	10.197	411	5.54186	2.19542	1.1345	0.54348	-0.879702
EIF2B4	eukaryotic translation initiation factor 2B subunit delta	XM_003497052.1	Q9UI10	Metabolism	598.5	27.3797	637	45.8173	515.5	58.1983	2.12561	1.08787	1.27023	0.345087
EIF2B4	eukaryotic translation initiation factor 2B subunit delta	XM_003497053.1	Q9UI10	Metabolism	578.5	24.4126	610	40.4731	495.5	51.6028	2.11377	1.07982	1.27499	0.350484
GNPTG	N-acetylglucosamine-1-phosphate transferase gamma subunit	XM_003501474.1	Q9UJJ9	Metabolism	639	27.067	829	55.2103	526	54.985	2.03144	1.0225	0.995918	-0.00590146
MAPK8IP3	mitogen-activated protein kinase 8 interacting protein 3	XM_003501486.1	Q9UPT6	Metabolism	138.333	2.75042	291	9.09684	114.533	5.61981	2.04326	1.03087	0.617776	-0.694844
MAPK8IP3	mitogen-activated protein kinase 8 interacting protein 3	XM_003501489.1	Q9UPT6	Metabolism	137.133	2.77266	292.867	9.31001	113.4	5.65829	2.04074	1.02909	0.607765	-0.718416
MAPK8IP3	mitogen-activated protein kinase 8 interacting protein 3	XM_003501488.1	Q9UPT6	Metabolism	134.133	2.69956	286.867	9.07741	110.733	5.49987	2.03732	1.02667	0.605885	-0.722883
MAPK8IP3	mitogen-activated protein kinase 8 interacting protein 3	XM_003501485.1	Q9UPT6	Metabolism	137.133	2.69599	289.2	8.93922	113.067	5.48565	2.03474	1.02485	0.613661	-0.704486
MAPK8IP3	mitogen-activated protein kinase 8 interacting protein 3	XM_003501490.1	Q9UPT6	Metabolism	140.133	2.76946	293.7	9.12606	115.533	5.63481	2.03462	1.02476	0.617441	-0.695626
ACOT9	acyl-CoA thioesterase 9	XM_003511501.1	Q9Y305	Metabolism	505	21.981	538	36.8183	420	45.1152	2.05247	1.03736	1.22535	0.293191
OPLAH	5-oxoprolinase (ATP-hydrolysing)	XM_003507626.1	O14841	Metabolism	1859	37.1865	3614	113.663	2415	119.218	3.20594	1.68075	1.04887	0.0688345
HMMR	hyaluronan mediated motility receptor	XM_003500903.1	O75330	Metabolism	1286	28.8059	1882	66.2805	1468	81.1492	2.81711	1.49421	1.22433	0.291993
GGPS1	geranylgeranyl diphosphate synthase 1	XM_003509880.1	O95749	Metabolism	612	25.5125	1093	71.6388	652	67.0761	2.62914	1.39459	0.93631	-0.0949417
LCAT	lecithin-cholesterol acyltransferase	XM_003504283.1	P04180	Metabolism	339	20.2205	1167	109.443	797	117.319	5.80199	2.53655	1.07196	0.100255
GALT	galactose-1-phosphate uridylyltransferase	XM_003504997.1	P07902	Metabolism	288	21.8321	561	66.8638	456	85.3071	3.90742	1.96622	1.27583	0.351441
ENO2	enolase 2 (gamma, neuronal)	XM_003496067.1	P09104	Metabolism	401	24.2486	1222	116.182	707	105.507	4.35104	2.12136	0.908114	-0.139054
PLA2G4B	phospholipase A2 group IVB	XM_003498089.1	P0C869	Metabolism	203	6.29697	1014	49.4538	361	27.6351	4.38863	2.13377	0.558807	-0.839579
CYP2D6	cytochrome P450 family 2 subfamily D member 6	XM_003508801.1	P10635	Metabolism	134.5	4.43725	275.5	14.2902	172.5	14.0443	3.16508	1.66224	0.982788	-0.0250481
CHKA	choline kinase alpha	XM_003514892.1	P35790	Metabolism	224	17.9641	474	59.7671	242	47.8951	2.66616	1.41476	0.801363	-0.319472
CHKA	choline kinase alpha	XM_003509916.1	P35790	Metabolism	133	25.5989	301	91.088	180	85.4987	3.33994	1.73982	0.938638	-0.0913587
BTD	biotinidase	XM_003495343.1	P43251	Metabolism	208	8.58476	304	19.7272	190	19.3525	2.25428	1.17267	0.981007	-0.0276641
PHKA2	phosphorylase kinase, alpha 2 (liver)	XM_003499492.1	P46019	Metabolism	3686	51.9144	5720	126.664	3333	115.847	2.23151	1.15802	0.914601	-0.128786
PPOX	protoporphyrinogen oxidase	XM_003506863.1	P50336	Metabolism	412	22.0723	1014	85.411	702	92.8123	4.20492	2.07208	1.08665	0.119893
CLN3	ceroid-lipofuscinosis, neuronal 3	XM_003514860.1	Q13286	Metabolism	638	38.2285	1478	139.241	957	141.513	3.70177	1.88821	1.01632	0.0233524
CWF19L2	CWF19-like 2, cell cycle control (S. pombe)	XM_003513535.1	Q2TBE0	Metabolism	956	28.1814	1394	64.609	1067	77.6224	2.75438	1.46173	1.20142	0.264737
PPP4R3B	protein phosphatase 4 regulatory subunit 3B	XM_003514251.1	Q5MIZ7	Metabolism	271	9.00069	1790	93.4728	1128	92.4557	10.2721	3.36065	0.989119	-0.0157847
AFMID	arylformamidase	XM_003498834.1	Q63HM1	Metabolism	173	12.9649	438	51.6089	277	51.2298	3.95141	1.98237	0.992654	-0.010637
ATG9B	autophagy related 9B	XM_003501320.1	Q674R7	Metabolism	510	18.5551	2388	136.601	1742	156.408	8.42939	3.07543	1.145	0.19535
NADSYN1	NAD synthetase 1	XM_003505693.1	Q6IA69	Metabolism	342	10.3922	831	39.7016	451	33.8202	3.25438	1.70238	0.851859	-0.231313
KDELC1	KDEL motif containing 1	XM_003512994.1	Q6UW63	Metabolism	735	28.5722	1141	69.7378	772	74.0615	2.59208	1.37411	1.062	0.0867818
HSDL2	hydroxysteroid dehydrogenase like 2	XM_003505507.1	Q6YN16	Metabolism	4256.14	120.816	11314.2	504.961	9267.05	649.184	5.37334	2.42582	1.28561	0.362455
PNPLA7	patatin like phospholipase domain containing 7	XM_003510567.1	Q6ZV29	Metabolism	514	7.92066	1373	33.2655	542	20.6118	2.60228	1.37978	0.619614	-0.690559
ASPG	asparaginase	XM_003498761.1	Q86U10	Metabolism	716	24.1463	2075	110.022	1241	103.283	4.27737	2.09672	0.938741	-0.0912004
GLB1L2	galactosidase beta 1 like 2	XM_003495848.1	Q8IW92	Metabolism	150	5.99649	943	59.2711	565	55.7407	9.29555	3.21654	0.940436	-0.0885991
PLPP5	phospholipid phosphatase 5	XM_003498225.1	Q8NEB5	Metabolism	200	11.0912	324	28.25	188	25.7291	2.31978	1.21399	0.910762	-0.134853
EXD1	exonuclease 3'-5' domain containing 1	XM_003498068.1	Q8NHP7	Metabolism	121	3.79665	647	31.9187	583	45.1442	11.8905	3.57174	1.41435	0.500138
CPT1C	carnitine palmitoyltransferase 1C	XM_003514085.1	Q8TCG5	Metabolism	153	5.00573	1004	51.6458	305	24.626	4.91956	2.29853	0.476824	-1.06847
GALM	galactose mutarotase (aldose 1-epimerase)	XM_003506567.1	Q96C23	Metabolism	393.588	16.9262	502.416	33.9708	374.124	39.7055	2.34581	1.23008	1.16881	0.225043
FAHD2A	fumarylacetoacetate hydrolase domain containing 2A	XM_003497808.1	Q96GK7	Metabolism	239	17.5937	369	42.7081	230	41.7834	2.37491	1.24788	0.978349	-0.0315791
SH3YL1	SH3 and SYLF domain containing 1	XM_003501413.1	Q96HL8	Metabolism	120	8.05243	330	34.8165	188	31.133	3.86629	1.95095	0.894203	-0.161326
DNAH8	dynein axonemal heavy chain 8	XM_003504449.1	Q96JB1	Metabolism	371	2.06278	1052	9.19645	518	7.10766	3.44567	1.78479	0.77287	-0.371703
ACAP3	ArfGAP with coiled-coil, ankyrin repeat and PH domains 3	XM_003509964.1	Q96P50	Metabolism	608	12.5535	1325	43.0134	814.5	41.5022	3.30602	1.7251	0.964867	-0.0515979
ACAP3	ArfGAP with coiled-coil, ankyrin repeat and PH domains 3	XM_003509965.1	Q96P50	Metabolism	622	12.8024	1340	43.3642	821.5	41.7279	3.25938	1.7046	0.962266	-0.0554927
THUMPD2	THUMP domain containing 2	XM_003507045.1	Q9BTF0	Metabolism	150	6.58713	514	35.489	249	26.985	4.09662	2.03444	0.760376	-0.395215
SERHL2	serine hydrolase-like 2	XM_003508807.1	Q9H4I8	Metabolism	299.5	22.9018	355	42.6803	317	59.8206	2.61204	1.38518	1.4016	0.487072
GBA2	glucosidase, beta (bile acid) 2	XM_003504985.1	Q9HCG7	Metabolism	289	8.45609	564	25.9464	353	25.4897	3.01436	1.59185	0.982399	-0.0256191
GPCPD1	glycerophosphocholine phosphodiesterase 1	XM_003499046.1	Q9NPB8	Metabolism	748	19.9552	1516	63.5887	837	55.1059	2.76148	1.46544	0.8666	-0.206562
ACP6	acid phosphatase 6, lysophosphatidic	XM_003498605.1	Q9NPH0	Metabolism	329	19.4041	398	36.9067	308	44.8297	2.31032	1.2081	1.21467	0.28057
NIT2	nitrilase family member 2	XM_003504874.1	Q9NQR4	Metabolism	337	20.809	569	55.2408	330	50.2868	2.41659	1.27297	0.91032	-0.135555
PANK4	pantothenate kinase 4	XM_003513848.1	Q9NVE7	Metabolism	1115	34.0778	2092	100.527	1424	107.405	3.15176	1.65616	1.06842	0.0954741
CROT	carnitine O-octanoyltransferase	XM_003506279.1	Q9UKG9	Metabolism	520	15.7464	1181.5	56.252	1041.5	77.8316	4.94281	2.30533	1.38362	0.468451
CROT	carnitine O-octanoyltransferase	XM_003506280.1	Q9UKG9	Metabolism	517	15.1836	1164.5	53.7713	1016.5	73.6734	4.85216	2.27863	1.37012	0.454307
ACAD8	acyl-CoA dehydrogenase family member 8	XM_003495829.1	Q9UKU7	Metabolism	354	14.7729	484	31.7565	401	41.2975	2.7955	1.48311	1.30044	0.379003
CHKB	choline kinase beta	XM_003515462.1	Q9Y259	Metabolism	419	23.6009	1566	138.686	1184	164.583	6.97358	2.8019	1.18673	0.246993
CA5B	carbonic anhydrase VB, mitochondrial	XM_003511521.1	Q9Y2D0	Metabolism	898	47.4328	1042	86.5358	816	106.368	2.2425	1.16511	1.22918	0.297694
DAGLA	diacylglycerol lipase alpha	XM_003513523.1	Q9Y4D2	Metabolism	509	7.23732	1749	39.0999	511	17.9308	2.47754	1.30891	0.458589	-1.12473
CSAD	cysteine sulfinic acid decarboxylase	XM_003515024.1	Q9Y600	Metabolism	370	20.7373	468	41.2403	381	52.6979	2.54121	1.34552	1.27783	0.35369
CYP46A1	cytochrome P450 family 46 subfamily A member 1	XM_003503718.1	Q9Y6A2	Metabolism	159	5.96354	1072	63.2161	723	66.9212	11.2217	3.48822	1.05861	0.0821705
STRC	stereocilin	XM_003498074.1	Q7RTU9	Organelle Organization	161	2.35542	907	20.8629	416	15.0194	6.37655	2.67278	0.71991	-0.474111
ALS2CL	ALS2 C-terminal like	XM_003506660.1	Q60I27	Organelle Organization	1994	47.6542	3120	117.235	1687	99.4968	2.08789	1.06205	0.848697	-0.236678
COIL	coilin	XM_003498189.1	P38432	Organelle Organization	624	26.3187	743	49.2713	582	60.5787	2.30174	1.20273	1.22949	0.298065
GOLGB1	golgin B1	XM_003501097.1	Q14789	Organelle Organization	1229.33	10.0582	2295.5	29.5293	1369.5	27.6523	2.74923	1.45903	0.936434	-0.0947513
GOLGB1	golgin B1	XM_003501096.1	Q14789	Organelle Organization	1338.67	10.929	2355.5	30.2354	1413.5	28.4787	2.6058	1.38173	0.9419	-0.0863536
IQCB1	IQ motif containing B1	XM_003501098.1	Q15051	Organelle Organization	917	33.9418	1196	69.6022	839	76.6383	2.25793	1.175	1.10109	0.138933
TRIP11	thyroid hormone receptor interactor 11	XM_003513420.1	Q15643	Organelle Organization	656.333	8.49635	1061.5	21.605	699.667	22.352	2.63078	1.39549	1.03458	0.0490431
TRIP11	thyroid hormone receptor interactor 11	XM_003513421.1	Q15643	Organelle Organization	656.333	8.49635	1061	21.5948	699.667	22.352	2.63078	1.39549	1.03507	0.0497229
TRIP11	thyroid hormone receptor interactor 11	XM_003513422.1	Q15643	Organelle Organization	658.333	8.52644	1062.5	21.636	701.667	22.427	2.63029	1.39522	1.03656	0.0518027
TJAP1	tight junction associated protein 1	XM_003508323.1	Q5JTD0	Organelle Organization	1001	33.5141	2012	105.912	1216	100.472	2.9979	1.58395	0.948632	-0.0760792
CEP162	centrosomal protein 162kDa	XM_003495630.1	Q5TB80	Organelle Organization	812	14.8638	1436	41.329	910	41.1088	2.76569	1.46764	0.99467	-0.00770945
BBOF1	basal body orientation factor 1	XM_003505147.1	Q8ND07	Organelle Organization	107	5.32059	155	12.1181	124	15.2165	2.85993	1.51598	1.25569	0.32848
BBS10	Bardet-Biedl syndrome 10	XM_003506581.1	Q8TAM1	Organelle Organization	150	4.34228	417	18.9797	187	13.3594	3.07658	1.62133	0.703879	-0.506601
LRRC45	leucine rich repeat containing 45	XM_003496902.1	Q96CN5	Organelle Organization	704	24.8015	979	54.2267	629	54.6857	2.20494	1.14074	1.00846	0.012159
FOXRED1	FAD-dependent oxidoreductase domain containing 1	XM_003502700.1	Q96CU9	Organelle Organization	846.956	32.2882	2395.84	143.604	1169.87	110.062	3.40874	1.76924	0.766428	-0.383777
IFT74	intraflagellar transport 74	XM_003503209.1	Q96LB3	Organelle Organization	1304	36.3232	1473	64.5112	1279	87.9215	2.42053	1.27532	1.36289	0.446667
CCDC114	coiled-coil domain containing 114	XM_003512199.1	Q96M63	Organelle Organization	315	9.85249	665	32.7027	460	35.5068	3.60384	1.84953	1.08575	0.118687
SCLT1	sodium channel and clathrin linker 1	XM_003504856.1	Q96NL6	Organelle Organization	357	15.2365	795	53.3469	553	58.2451	3.82274	1.93461	1.09182	0.126732
MSTO1	misato 1, mitochondrial distribution and morphology regulator	XM_003501579.1	Q9BUK6	Organelle Organization	297.667	10.687	709.833	40.0689	487.333	43.1787	4.0403	2.01446	1.07761	0.107836
MSTO1	misato 1, mitochondrial distribution and morphology regulator	XM_003501578.1	Q9BUK6	Organelle Organization	309.667	11.3819	723.833	41.8297	491.333	44.5672	3.91561	1.96924	1.06544	0.0914524
TMED9	transmembrane p24 trafficking protein 9	XM_003498147.1	Q9BVK6	Organelle Organization	3444.75	139.979	5475.39	349.82	4606.39	461.936	3.30005	1.72249	1.3205	0.401081
MKS1	Meckel syndrome, type 1	XM_003503790.1	Q9NXB0	Organelle Organization	182	8.42364	404	29.3992	215	24.5576	2.91531	1.54365	0.835313	-0.259611
CC2D2A	coiled-coil and C2 domain containing 2A	XM_003513845.1	Q9P2K1	Organelle Organization	407.5	6.44953	622.5	15.4905	365.5	14.276	2.21349	1.14632	0.921595	-0.117795
CC2D2A	coiled-coil and C2 domain containing 2A	XM_003513844.1	Q9P2K1	Organelle Organization	421.5	6.71963	648.5	16.2549	376.5	14.8126	2.20437	1.14037	0.91127	-0.134049
BCS1L	BCS1 homolog, ubiquinol-cytochrome c reductase complex chaperone	XM_003507606.1	Q9Y276	Organelle Organization	260	16.0544	518	50.2895	238	36.2675	2.25903	1.1757	0.721173	-0.471583
DENND6B	DENN domain containing 6B	XM_003509555.1	Q8NEG7	Organelle Organization	248	9.80983	1125	69.9662	564	55.0563	5.61236	2.48861	0.786899	-0.34575
KLHL4	kelch like family member 4	XM_003514398.1	Q9C0H6	Protein processing	1133	47.4572	1975	130.066	1129	116.704	2.45913	1.29815	0.897262	-0.156399
FKBP2	FK506 binding protein 2	XM_003511270.1	P26885	Protein processing	129	16.8262	184	37.7347	109.5	35.2476	2.0948	1.06681	0.93409	-0.098367
FKBP2	FK506 binding protein 2	XM_003511269.1	P26885	Protein processing	137	20.3601	182	42.5261	111.5	40.8932	2.0085	1.00612	0.961603	-0.0564869
OGFOD1	2-oxoglutarate and iron dependent oxygenase domain containing 1	XM_003503605.1	Q8N543	Protein processing	1786.7	29.7208	2353.9	61.5633	1576.2	64.705	2.1771	1.12241	1.05103	0.0718054
FKBP10	FK506 binding protein 10	XM_003504616.1	Q96AY3	Protein processing	2706	87.0529	3264	165.094	2217	176.011	2.02188	1.0157	1.06612	0.0923756
UBA6	ubiquitin like modifier activating enzyme 6	XM_003511444.1	A0AVT1	Protein processing	562	33.072	936	86.6016	559	81.1809	2.45467	1.29553	0.937407	-0.0932524
CAPN8	calpain 8	XM_003494961.1	A6NHC0	Protein processing	149	5.56731	366	21.5014	354	32.6423	5.8632	2.55169	1.51815	0.602314
PEX12	peroxisomal biogenesis factor 12	XM_003511305.1	O00623	Protein processing	459.526	12.2634	1429.47	59.9794	730.567	48.1149	3.92345	1.97212	0.802191	-0.317982
PFDN6	prefoldin subunit 6	XM_003510832.1	O15212	Protein processing	830	127.677	826	199.775	799	303.32	2.37567	1.24834	1.5183	0.602462
EIF5B	eukaryotic translation initiation factor 5B	XM_003503337.1	O60841	Protein processing	3650.5	61.3839	4340.5	114.754	3247.5	134.763	2.19541	1.13449	1.17436	0.231876
MMP23A	matrix metallopeptidase 23A (pseudogene)	XM_003514850.1	O75900	Protein processing	251.5	16.1094	765.5	77.0927	531.5	84.0163	5.21535	2.38276	1.08981	0.124075
CNOT4	CCR4-NOT transcription complex subunit 4	XM_003508892.1	O95628	Protein processing	332.333	8.5565	884.5	35.8052	636.167	40.4214	4.72406	2.24003	1.12893	0.17495
CNOT4	CCR4-NOT transcription complex subunit 4	XM_003508891.1	O95628	Protein processing	484.333	12.3691	725.5	29.1312	492.167	31.0188	2.50776	1.3264	1.0648	0.0905792
CNOT4	CCR4-NOT transcription complex subunit 4	XM_003508890.1	O95628	Protein processing	576.333	13.8071	774	29.1539	508.667	30.0733	2.1781	1.12307	1.03154	0.0447948
F8	coagulation factor VIII	XM_003507245.1	P00451	Protein processing	420	4.68331	966	16.9358	610	16.7862	3.58425	1.84167	0.991163	-0.0128061
CHM	CHM, Rab escort protein 1	XM_003511211.1	P24386	Protein processing	461	19.4646	803	53.3071	558	58.1428	2.98711	1.57875	1.09071	0.125273
NKTR	natural killer cell triggering receptor	XM_003500677.1	P30414	Protein processing	1323	24.3364	4419	127.804	2410	109.403	4.49547	2.16847	0.856023	-0.224279
GGCX	gamma-glutamyl carboxylase	XM_003505631.1	P38435	Protein processing	494	14.0938	1179	52.886	684	48.1587	3.41702	1.77274	0.910615	-0.135088
CLK2	CDC like kinase 2	XM_003501585.1	P49760	Protein processing	616.5	21.9839	2407.5	134.978	1249	109.914	4.99974	2.32185	0.814307	-0.296354
CLK3	CDC like kinase 3	XM_003502401.1	P49761	Protein processing	1545	60.6576	1678	103.58	1461	141.555	2.33367	1.2226	1.36663	0.450621
SERPINB8	serpin peptidase inhibitor, clade B (ovalbumin), member 8	XM_003514393.1	P50452	Protein processing	483.313	10.5651	1412.41	48.5437	788.682	42.5467	4.02709	2.00974	0.876461	-0.190238
USP11	ubiquitin specific peptidase 11	XM_003515981.1	P51784	Protein processing	519	36.1166	869	95.0792	582.5	100.035	2.76979	1.46978	1.05213	0.0733097
TTC3	tetratricopeptide repeat domain 3	XM_003507978.1	P53804	Protein processing	4510	59.6949	7620	158.578	5166	168.746	2.82681	1.49917	1.06412	0.0896645
PPIG	peptidylprolyl isomerase G	XM_003495938.1	Q13427	Protein processing	1274	37.9812	1800.5	84.3952	1335.5	98.2564	2.58698	1.37127	1.16424	0.21939
PPIG	peptidylprolyl isomerase G	XM_003495939.1	Q13427	Protein processing	1322	38.2279	1844.5	83.8598	1358.5	96.9454	2.53598	1.34254	1.15604	0.209193
PEX6	peroxisomal biogenesis factor 6	XM_003506068.1	Q13608	Protein processing	259	7.90359	915	43.9007	403	30.3492	3.83993	1.94108	0.691315	-0.532584
EIF4A2	eukaryotic translation initiation factor 4A2	XM_003508214.1	Q14240	Protein processing	1009.33	25.3421	1658.17	65.458	950.833	58.9157	2.32481	1.21711	0.900054	-0.151917
KIAA0753	KIAA0753	XM_003506368.1	Q2KHM9	Protein processing	440	12.0062	694	29.7742	396	26.6666	2.22106	1.15125	0.895629	-0.159027
ADCK5	aarF domain containing kinase 5	XM_003507660.1	Q3MIX3	Protein processing	608	27.527	1157	82.3597	718	80.2228	2.91433	1.54316	0.974055	-0.0379253
CCDC14	coiled-coil domain containing 14	XM_003495415.1	Q49A88	Protein processing	140.5	2.75943	288	8.89327	196.5	9.52409	3.45147	1.78721	1.07093	0.0988683
CCDC14	coiled-coil domain containing 14	XM_003495416.1	Q49A88	Protein processing	130.5	2.64193	257	8.18031	168.5	8.41839	3.18645	1.67195	1.0291	0.0413881
OTUD3	OTU deubiquitinase 3	XM_003506903.1	Q5T2D3	Protein processing	520	32.7234	740	73.2172	602	93.491	2.85701	1.5145	1.2769	0.352646
MRPL2	mitochondrial ribosomal protein L2	XM_003506069.1	Q5T653	Protein processing	551	45.915	866	113.461	644	132.436	2.88438	1.52826	1.16724	0.223102
DDI2	DNA damage inducible 1 homolog 2	XM_003511547.1	Q5TDH0	Protein processing	1112.33	45.9333	1649.58	107.101	1104.83	112.592	2.45121	1.29349	1.05127	0.0721349
FBXW9	F-box and WD repeat domain containing 9	XM_003501902.1	Q5XUX1	Protein processing	197	11.2898	511	46.0432	375	53.0357	4.69768	2.23195	1.15187	0.203975
DCAF15	DDB1 and CUL4 associated factor 15	XM_003501907.1	Q66K64	Protein processing	708	25.8423	1465	84.0738	956	86.1139	3.33229	1.73651	1.02427	0.0345897
ADAMTSL5	ADAMTS like 5	XM_003502572.1	Q6ZMM2	Protein processing	608	25.6713	1833	121.684	916	95.4459	3.718	1.89453	0.784378	-0.350379
P4HA3	prolyl 4-hydroxylase subunit alpha 3	XM_003514471.1	Q7Z4N8	Protein processing	1169.38	41.1596	5446.15	301.393	3002.42	260.8	6.3363	2.66364	0.865315	-0.208702
DZIP3	DAZ interacting zinc finger protein 3	XM_003500076.1	Q86Y13	Protein processing	692	14.803	1201	40.3936	823.5	43.4736	2.93681	1.55425	1.07625	0.106012
DZIP3	DAZ interacting zinc finger protein 3	XM_003500077.1	Q86Y13	Protein processing	528	13.5677	891	35.9979	606.5	38.4611	2.83475	1.50322	1.06843	0.0954901
KLHL7	kelch like family member 7	XM_003507450.1	Q8IXQ5	Protein processing	1630.03	63.5533	3543.69	217.232	2100.93	202.149	3.18079	1.66938	0.930569	-0.103816
SCYL3	SCY1 like pseudokinase 3	XM_003508277.1	Q8IZE3	Protein processing	338.5	12.098	678.5	38.1267	409	36.0741	2.98183	1.5762	0.946162	-0.0798401
SCYL3	SCY1 like pseudokinase 3	XM_003508278.1	Q8IZE3	Protein processing	276.5	10.6645	533.5	32.3525	328	31.2205	2.9275	1.54967	0.96501	-0.0513846
CEP112	centrosomal protein 112kDa	XM_003509161.1	Q8N8E3	Protein processing	313	10.5017	1056	55.7064	747	61.8521	5.88972	2.5582	1.11032	0.150978
BANK1	B-cell scaffold protein with ankyrin repeats 1	XM_003510863.1	Q8NDB2	Protein processing	1871	58.8004	5365	265.095	3264	253.148	4.30521	2.10608	0.954933	-0.0665293
NGDN	neuroguidin	XM_003502074.1	Q8NEJ9	Protein processing	978	70.2254	1501	169.458	1283	227.353	3.23747	1.69487	1.34165	0.424005
AGBL3	ATP/GTP binding protein-like 3	XM_003508900.1	Q8NEM8	Protein processing	186	4.86831	665	27.3661	438	28.2916	5.81138	2.53888	1.03382	0.0479844
PSMA8	proteasome subunit alpha 8	XM_003502221.1	Q8TAA3	Protein processing	321.667	15.7176	427.667	32.8558	306.5	36.9597	2.35149	1.23357	1.12491	0.169808
PSMA8	proteasome subunit alpha 8	XM_003502220.1	Q8TAA3	Protein processing	363.667	17.9701	470.667	36.5668	331.5	40.425	2.24956	1.16964	1.10551	0.144711
PSMA8	proteasome subunit alpha 8	XM_003502222.1	Q8TAA3	Protein processing	289.667	15.4138	391.667	32.7683	283	37.1635	2.41105	1.26966	1.13413	0.181584
ATG4A	autophagy related 4A cysteine peptidase	XM_003512437.1	Q8WYN0	Protein processing	597	22.3066	767	45.0589	552	50.8998	2.28183	1.19019	1.12963	0.17585
GOLGA1	golgin A1	XM_003508520.1	Q92805	Protein processing	294	7.41235	505	20.0182	329.5	20.5013	2.76583	1.46771	1.02413	0.0344029
GOLGA1	golgin A1	XM_003508521.1	Q92805	Protein processing	235	6.59251	395	17.4223	244.5	16.927	2.56761	1.36043	0.97157	-0.0416103
FBXW7	F-box and WD repeat domain containing 7	XM_003505741.1	Q969H0	Protein processing	519.5	11.068	517.043	17.3195	657	34.5434	3.12103	1.64202	1.99448	0.996016
FBXW7	F-box and WD repeat domain containing 7	XM_003505742.1	Q969H0	Protein processing	783.5	14.9165	611.043	18.2905	693	32.5596	2.18279	1.12617	1.78014	0.831988
ABTB1	ankyrin repeat and BTB domain containing 1	XM_003500221.1	Q969K4	Protein processing	132	7.24887	274	23.6577	173	23.4455	3.23437	1.69349	0.991032	-0.012996
ARRDC3	arrestin domain containing 3	XM_003508458.1	Q96B67	Protein processing	114	5.60859	158	12.2217	104	12.627	2.25137	1.1708	1.03316	0.0470668
DNAJC1	DnaJ heat shock protein family (Hsp40) member C1	XM_003499419.1	Q96KC8	Protein processing	360	16.565	581	42.033	437	49.6236	2.99569	1.58289	1.18059	0.239503
LRR1	leucine rich repeat protein 1	XM_003513992.1	Q96L50	Protein processing	197	12.1548	430	41.7135	339	51.6179	4.2467	2.08634	1.23744	0.307356
SECISBP2	SECIS binding protein 2	XM_003503546.1	Q96T21	Protein processing	308	9.25217	774	36.5561	352	26.0948	2.8204	1.4959	0.713829	-0.48635
RBM4B	RNA binding motif protein 4B	XM_003510138.1	Q9BQ04	Protein processing	224	10.1474	759	54.0595	285	31.8616	3.13989	1.65072	0.58938	-0.76273
TACO1	translational activator of mitochondrially encoded cytochrome c oxidase I	XM_003502975.1	Q9BSH4	Protein processing	767.15	40.6028	1650.98	137.386	891.7	116.469	2.86851	1.5203	0.847751	-0.238287
GTPBP2	GTP binding protein 2	XM_003515162.1	Q9BX10	Protein processing	537	24.2291	1212	85.9788	660	73.4895	3.03311	1.6008	0.854739	-0.226444
METTL17	methyltransferase like 17	XM_003514616.1	Q9H7H0	Protein processing	397	22.2981	1053	92.9888	704	97.5815	4.37623	2.12969	1.04939	0.0695497
ANKZF1	ankyrin repeat and zinc finger domain containing 1	XM_003507614.1	Q9H8Y5	Protein processing	395	11.481	998	45.6078	653	46.8397	4.07976	2.02848	1.02701	0.038451
LZTFL1	leucine zipper transcription factor like 1	XM_003507724.1	Q9NQ48	Protein processing	308	17.8192	422	38.3863	287	40.9768	2.29958	1.20137	1.06748	0.0942156
PPAN	peter pan homolog (Drosophila)	XM_003499773.1	Q9NQ55	Protein processing	1460	49.8116	3227	173.102	2144	180.518	3.62401	1.85759	1.04284	0.0605192
TULP4	tubby like protein 4	XM_003502818.1	Q9NRJ4	Protein processing	280	19.8169	484	53.8579	436	76.1522	3.84279	1.94215	1.41395	0.499729
UFSP2	UFM1-specific peptidase 2	XM_003509817.1	Q9NUQ7	Protein processing	177.5	9.97664	253	22.358	162.5	22.5402	2.2593	1.17587	1.00815	0.0117102
UFSP2	UFM1-specific peptidase 2	XM_003509816.1	Q9NUQ7	Protein processing	196.5	10.0107	288	23.0685	179.5	22.5675	2.25434	1.17271	0.978282	-0.0316771
RMND1	required for meiotic nuclear division 1 homolog	XM_003495873.1	Q9NWS8	Protein processing	596	26.9065	815	57.8489	563	62.7246	2.3312	1.22107	1.08428	0.116743
CNTLN	centlein	XM_003503400.1	Q9NXG0	Protein processing	923	22.9337	2258	88.2109	1705	104.548	4.5587	2.18862	1.1852	0.245134
CNTLN	centlein	XM_003504427.1	Q9NXG0	Protein processing	277	14.2964	601	48.7692	360	45.8528	3.20731	1.68136	0.9402	-0.0889602
SACS	sacsin molecular chaperone	XM_003500509.1	Q9NZJ4	Protein processing	7520	39.4019	12693	104.566	6182	79.9367	2.02875	1.02059	0.764464	-0.38748
RPS6KB2	ribosomal protein S6 kinase B2	XM_003509935.1	Q9UBS0	Protein processing	306	14.477	672	49.9864	315	36.7778	2.54043	1.34507	0.735756	-0.442702
PARP4	poly(ADP-ribose) polymerase family member 4	XM_003502075.1	Q9UKK3	Protein processing	768.333	10.5228	1454.58	31.3216	709.667	23.9857	2.27941	1.18866	0.765787	-0.384985
ADAMTS6	ADAM metallopeptidase with thrombospondin type 1 motif 6	XM_003507933.1	Q9UKP5	Protein processing	237	3.8802	512	13.1796	416	16.808	4.33175	2.11495	1.27531	0.350848
FBXW2	F-box and WD repeat domain containing 2	XM_003511431.1	Q9UKT8	Protein processing	715	40.8865	1255	112.835	674	95.1156	2.32633	1.21806	0.842963	-0.246459
ZDHHC8	zinc finger DHHC-type containing 8	XM_003502440.1	Q9ULC8	Protein processing	1282	31.2245	2706	103.624	1706	102.543	3.28404	1.71547	0.989563	-0.0151363
USP20	ubiquitin specific peptidase 20	XM_003514514.1	Q9Y2K6	Protein processing	503	14.4446	1132	51.1103	491	34.7965	2.40897	1.26842	0.680812	-0.554671
TTLL3	tubulin tyrosine ligase like 3	XM_003496919.1	Q9Y4R7	Protein processing	237	6.53023	735	31.8415	338	22.9834	3.51954	1.81539	0.721808	-0.470313
NAT8B	Probable N-acetyltransferase 8B;NAT8B;ortholog	XM_003510023.1	Q9UHF3	Protein processing	105.333	11.8916	225.667	40.0561	128.667	35.8476	3.01452	1.59193	0.894934	-0.160147
MTRF1L	mitochondrial translational release factor 1 like	XM_003495880.1	Q9UGC7	Protein processing	312	11.4784	447	25.8559	270	24.5136	2.13564	1.09467	0.948088	-0.0769076
LRRK2	leucine-rich repeat kinase 2	XM_003512947.1	Q5S007	Transport	533	5.26026	1641	25.4633	787	19.1678	3.64389	1.86548	0.752763	-0.409732
KIFC3	kinesin family member C3	XM_003509798.1	Q9BVG8	Transport	826	24.4222	1187	55.1799	873	63.6996	2.60827	1.38309	1.1544	0.207141
KIFC3	kinesin family member C3	XM_003509799.1	Q9BVG8	Transport	727	22.9849	950	47.2235	660	51.4956	2.24041	1.16376	1.09047	0.124946
KIF21A	kinesin family member 21A	XM_003515334.1	Q7Z4S6	Transport	934	21.787	1803	66.126	1202	69.1948	3.17596	1.66719	1.04641	0.0654453
KIF21A	kinesin family member 21A	XM_003515576.1	Q7Z4S6	Transport	231	13.3449	392	35.6053	202	28.7986	2.15803	1.10971	0.808831	-0.306091
SLC25A32	solute carrier family 25 member 32	NM_001246788.1	Q9H2D1	Transport	578	19.4591	990	52.403	487	40.4615	2.07931	1.0561	0.772122	-0.373099
FNBP4	formin binding protein 4	XM_003497335.1	Q8N3X1	Transport	3454	58.0426	5800	153.242	5000	207.354	3.57245	1.83691	1.35311	0.436283
SLC30A6	solute carrier family 30 member 6	XM_003502488.1	Q6NXT4	Transport	325	15.9496	552	42.5924	273	33.0634	2.07299	1.05171	0.776275	-0.365359
SLC26A11	solute carrier family 26 member 11	XM_003506705.1	Q86WA9	Transport	147	9.33252	257	25.6531	124	19.4277	2.08172	1.05778	0.757322	-0.40102
MYO19	myosin XIX	XM_003500729.1	Q96H55	Transport	1871	38.5201	2875	93.0631	1607	81.6485	2.11963	1.08381	0.877345	-0.188784
FHOD1	formin homology 2 domain containing 1	XM_003508545.1	Q9Y613	Transport	1589	35.3322	2069	72.3325	1345	73.8052	2.08889	1.06274	1.02036	0.0290804
SLC4A7	solute carrier family 4 member 7	XM_003499191.1	Q9Y6M7	Transport	1479	33.3944	1773	62.942	1283	71.4908	2.1408	1.09815	1.13582	0.183736
FCHO1	FCH domain only 1	XM_003499126.1	O14526	Transport	136	3.99712	258	11.9221	181	13.1282	3.28441	1.71564	1.10116	0.139026
ABCD4	ATP binding cassette subfamily D member 4	XM_003514268.1	O14678	Transport	463	17.0177	1000	57.7892	628	56.9637	3.34732	1.743	0.985716	-0.0207557
SLC31A2	solute carrier family 31 member 2	XM_003503464.1	O15432	Transport	126.467	6.35667	242.904	19.1962	130.32	16.1653	2.54304	1.34655	0.842109	-0.24792
AP5Z1	adaptor related protein complex 5 zeta 1 subunit	XM_003496290.1	O43299	Transport	442	13.8412	785	38.6499	418	32.3033	2.33385	1.22271	0.835793	-0.258782
GRIN3B	glutamate ionotropic receptor NMDA type subunit 3B	XM_003502606.1	O60391	Transport	253	7.90388	570	27.9976	345	26.5985	3.36524	1.75071	0.950028	-0.0739577
NEMF	nuclear export mediator factor	XM_003515222.1	O60524	Transport	1106.5	41.6395	2187	129.398	1421	131.967	3.16928	1.66416	1.01985	0.0283612
PLIN3	perilipin 3	XM_003501752.1	O60664	Transport	442.583	18.5677	1011.85	66.743	586.733	60.7467	3.27163	1.71001	0.910158	-0.135811
CCDC22	coiled-coil domain containing 22	XM_003505079.1	O60826	Transport	1954	69.9626	3363	189.319	2681	236.895	3.38603	1.75959	1.2513	0.32343
AP1G2	adaptor related protein complex 1 gamma 2 subunit	XM_003502071.1	O75843	Transport	491	15.8408	737	37.3843	488	38.8539	2.45277	1.29441	1.03931	0.0556244
SNUPN	snurportin 1	XM_003497920.1	O95149	Transport	633	37.1118	849	78.2603	611	88.403	2.38208	1.25222	1.1296	0.175816
CHRNB1	cholinergic receptor nicotinic beta 1 subunit	XM_003497243.1	P11230	Transport	340	12.7522	769	45.3481	546	50.538	3.96307	1.98662	1.11444	0.156325
SLC4A3	solute carrier family 4 member 3	XM_003510602.1	P48751	Transport	354	7.37668	1606	52.6173	903	46.4369	6.2951	2.65423	0.88254	-0.180266
RAB9A	RAB9A, member RAS oncogene family	XM_003509046.1	P51151	Transport	393.564	40.1261	990.448	158.77	557.434	140.257	3.49539	1.80545	0.883393	-0.178873
CLCN2	chloride voltage-gated channel 2	XM_003509600.1	P51788	Transport	1010	26.9814	1357	56.9965	1266	83.463	3.09336	1.62917	1.46435	0.550265
CACNB3	calcium voltage-gated channel auxiliary subunit beta 3	XM_003510743.1	P54284	Transport	235	12.7719	492	42.0414	237	31.7872	2.48885	1.31548	0.756094	-0.403363
SNX16	sorting nexin 16	XM_003510069.1	P57768	Transport	330.5	12.1988	516	29.9448	355.5	32.3819	2.65452	1.40845	1.08139	0.112886
FCHO2	FCH domain only 2	XM_003503693.1	Q0JRZ9	Transport	816	17.8031	1119	38.3849	738	39.7355	2.23195	1.1583	1.03519	0.0498905
SLC10A2	solute carrier family 10 member 2	NM_001246820.1	Q12908	Transport	194.503	6.78259	774.846	42.4825	377.856	32.5171	4.79421	2.26129	0.765425	-0.385668
COG2	component of oligomeric golgi complex 2	XM_003496817.1	Q14746	Transport	540	15.865	730	33.7206	518	37.5573	2.3673	1.24325	1.11378	0.155463
SLC9A5	solute carrier family 9 member A5	XM_003508563.1	Q14940	Transport	574	16.7208	2346	107.448	1130	81.2345	4.8583	2.28045	0.756036	-0.403472
ACAP1	ArfGAP with coiled-coil, ankyrin repeat and PH domains 1	XM_003497188.1	Q15027	Transport	130	4.61484	483	26.9579	156	13.6665	2.96142	1.56629	0.506955	-0.980069
EEA1	early endosome antigen 1	XM_003506362.1	Q15075	Transport	366	25.2028	573	62.0367	434	73.7524	2.92635	1.5491	1.18885	0.249568
MTX3	metaxin 3	XM_003508765.1	Q5HYI7	Transport	150	12.1781	278	35.486	152	30.4543	2.50075	1.32236	0.858205	-0.220606
DOPEY1	dopey family member 1	XM_003495642.1	Q5JWR5	Transport	698	7.15813	1016	16.3819	634	16.0454	2.24157	1.16451	0.979463	-0.0299378
AP1AR	adaptor related protein complex 1 associated regulatory protein	XM_003515810.1	Q63HQ0	Transport	973.5	34.7928	1709.5	96.0614	980.5	86.4808	2.48559	1.31359	0.900266	-0.151577
LMBR1L	limb development membrane protein 1 like	XM_003510733.1	Q6UX01	Transport	287	11.7166	760	48.7821	512	51.5833	4.40257	2.13835	1.05742	0.0805522
MAMDC4	MAM domain containing 4	XM_003514067.1	Q6UXC1	Transport	660	13.2628	2973	93.9318	1479	73.3463	5.53022	2.46734	0.780846	-0.35689
NBEAL1	neurobeachin like 1	XM_003497424.1	Q6ZS30	Transport	134.375	1.28161	468.542	7.02605	261.408	6.15283	4.80086	2.26329	0.875716	-0.191464
TMC8	transmembrane channel like 8	XM_003498836.1	Q8IU68	Transport	722	26.3411	1338	76.75	790	71.1282	2.70027	1.43311	0.926751	-0.109746
ABCA9	ATP binding cassette subfamily A member 9	XM_003500310.1	Q8IUA7	Transport	238	3.85498	281.5	7.16886	314	12.5514	3.2559	1.70306	1.75083	0.808037
PLEKHM2	pleckstrin homology and RUN domain containing M2	XM_003515131.1	Q8IWE5	Transport	2649	51.1107	4812	145.976	3092	147.227	2.88055	1.52634	1.00857	0.0123115
GCC2	GRIP and coiled-coil domain containing 2	XM_003503757.1	Q8IWJ2	Transport	1817	22.056	3322	63.4013	2513	75.2806	3.41315	1.7711	1.18737	0.247766
RHOT2	ras homolog family member T2	XM_003501521.1	Q8IXI1	Transport	800	31.315	1756	108.072	904	87.3271	2.78867	1.47958	0.808046	-0.30749
ABCA7	ATP binding cassette subfamily A member 7	XM_003502561.1	Q8IZY2	Transport	533	6.46994	1720	32.8267	627	18.7827	2.90308	1.53758	0.572178	-0.805463
ABCA6	ATP binding cassette subfamily A member 6	XM_003500309.1	Q8N139	Transport	185	2.98732	902	22.9004	413	16.4581	5.5093	2.46187	0.71868	-0.476578
ATG16L2	autophagy related 16 like 2	XM_003508587.1	Q8NAA4	Transport	462	14.5716	925	45.8705	751	58.4553	4.01159	2.00417	1.27436	0.349767
TPCN2	two pore segment channel 2	XM_003513359.1	Q8NHX9	Transport	112.5	4.16212	269.5	15.6764	131	11.9606	2.87367	1.52289	0.762965	-0.390311
TPCN2	two pore segment channel 2	XM_003513358.1	Q8NHX9	Transport	131.5	4.6998	288.5	16.2116	139	12.2599	2.6086	1.38327	0.756243	-0.403079
THOC2	THO complex 2	XM_003515096.1	Q8NI27	Transport	1304	17.8621	5260	113.283	3817	129.031	7.22375	2.85275	1.13901	0.187784
TRPM4	transient receptor potential cation channel subfamily M member 4	XM_003508669.1	Q8TD43	Transport	271	5.77678	662	22.1871	354	18.6225	3.22368	1.68871	0.839339	-0.252674
SLC20A1	solute carrier family 20 member 1	NM_001244011.1	Q8WUM9	Transport	237	9.16793	237.5	14.4448	274.5	26.2049	2.85833	1.51517	1.81414	0.859286
SLC20A1	solute carrier family 20 member 1	NM_001244012.1	Q8WUM9	Transport	3540	111.608	2911.5	144.323	3517.5	273.681	2.45216	1.29405	1.89631	0.923196
SLC38A4	solute carrier family 38 member 4	XM_003510476.1	Q969I6	Transport	117	7.00525	281	26.4527	161	23.7893	3.39592	1.7638	0.899315	-0.153102
SLC25A28	solute carrier family 25 member 28	XM_003512390.1	Q96A46	Transport	919	40.2005	1305	89.7538	1114	120.26	2.99149	1.58086	1.33988	0.422107
MCUR1	mitochondrial calcium uniporter regulator 1	XM_003497944.1	Q96AQ8	Transport	659.487	55.2469	2181.05	287.271	1267.81	262.104	4.74423	2.24617	0.912392	-0.132275
MIEF2	mitochondrial elongation factor 2	XM_003496326.1	Q96C03	Transport	144	8.28854	243	21.9911	148	21.023	2.5364	1.34278	0.955978	-0.0649513
TMCO6	transmembrane and coiled-coil domains 6	XM_003510363.1	Q96DC7	Transport	173	9.19332	500	41.7756	273	35.802	3.89435	1.96138	0.857008	-0.222619
HOOK2	hook microtubule-tethering protein 2	XM_003501916.1	Q96ED9	Transport	1357	47.5726	1924	106.049	1300	112.471	2.36419	1.24134	1.06055	0.0848107
SLC39A13	solute carrier family 39 member 13	XM_003497320.1	Q96H72	Transport	1014	39.5544	1435	88.0105	943	90.7793	2.29505	1.19852	1.03146	0.0446868
MAP6	microtubule associated protein 6	XM_003512853.1	Q96JE9	Transport	258	13.9069	975	82.6309	474	63.0534	4.53395	2.18077	0.763073	-0.390107
RILP	Rab interacting lysosomal protein	XM_003514777.1	Q96NA2	Transport	133	9.48106	242	27.1235	150	26.3885	2.78328	1.47679	0.9729	-0.0396367
SLC50A1	solute carrier family 50 member 1	XM_003501592.1	Q9BRV3	Transport	648	52.5551	837	106.731	851	170.329	3.24095	1.69642	1.59587	0.674339
TMEM175	transmembrane protein 175	XM_003502363.1	Q9BSA9	Transport	1261	33.348	1921	79.8743	1349	88.0408	2.64007	1.40057	1.10224	0.140441
MLPH	melanophilin	XM_003514981.1	Q9BV36	Transport	173	8.90547	660	53.4171	199	25.2803	2.83874	1.50525	0.473262	-1.07929
KIAA0586	KIAA0586	XM_003514918.1	Q9BVV6	Transport	618	10.9593	1058	29.4988	663	29.0151	2.64754	1.40465	0.983604	-0.023851
SLC26A6	solute carrier family 26 member 6	XM_003504235.1	Q9BXS9	Transport	722	22.1696	2145	103.555	1013	76.7622	3.4625	1.79182	0.741267	-0.431936
MCOLN1	mucolipin 1	XM_003507757.1	Q9GZU1	Transport	921.067	33.7755	1807.4	104.206	1201.07	108.692	3.21806	1.68619	1.04305	0.0608083
NXF2	nuclear RNA export factor 2	XM_003507891.1	Q9GZY0	Transport	522.5	22.5314	730.5	49.5277	528	56.1893	2.49382	1.31836	1.1345	0.182062
NXF2	nuclear RNA export factor 2	XM_003507890.1	Q9GZY0	Transport	530.5	22.435	732.5	48.7051	531	55.4184	2.47017	1.30461	1.13783	0.186291
VPS16	VPS16, CORVET/HOPS core subunit	XM_003499039.1	Q9H269	Transport	864.5	26.0088	1468.5	69.4631	960.5	71.3132	2.74189	1.45517	1.02663	0.0379221
VPS16	VPS16, CORVET/HOPS core subunit	XM_003499040.1	Q9H269	Transport	614.5	22.1326	1147.5	64.9814	752.5	66.886	3.02206	1.59553	1.02931	0.0416772
SLC12A5	solute carrier family 12 member 5	XM_003500518.1	Q9H2X9	Transport	574	12.8282	2944	103.447	1034	57.0287	4.44556	2.15237	0.551284	-0.859134
TBC1D17	TBC1 domain family member 17	XM_003510882.1	Q9HA65	Transport	294.5	12.5758	633	42.4992	367	38.6754	3.07538	1.62076	0.910028	-0.136018
TBC1D17	TBC1 domain family member 17	XM_003510881.1	Q9HA65	Transport	345.5	12.6577	677	38.9961	386	34.899	2.75713	1.46317	0.894934	-0.160147
PICK1	protein interacting with PRKCA 1	XM_003510280.1	Q9NRD5	Transport	350.5	18.5136	1032.5	85.7468	728.5	94.962	5.12932	2.35877	1.10747	0.147267
PICK1	protein interacting with PRKCA 1	XM_003516073.1	Q9NRD5	Transport	109.5	11.7246	744.5	125.336	601.5	158.942	13.5562	3.76089	1.26813	0.342701
SDAD1	SDA1 domain containing 1	XM_003512750.1	Q9NVU7	Transport	1762	61.6066	2303	126.602	1637	141.25	2.29277	1.19709	1.1157	0.157948
USE1	unconventional SNARE in the ER 1 homolog (S. cerevisiae)	XM_003499070.1	Q9NZ43	Transport	182	17.6658	322	49.141	241	57.7295	3.26786	1.70835	1.17477	0.23238
VPS9D1	VPS9 domain containing 1	XM_003495132.1	Q9Y2B5	Transport	217	8.87729	554	35.6333	285	28.7729	3.24118	1.69652	0.807472	-0.308516
AUP1	ancient ubiquitous protein 1	XM_003511130.1	Q9Y679	Transport	1193	57.6158	1741	132.198	1233	146.954	2.55059	1.35083	1.11162	0.152664
MTMR11	myotubularin related protein 11	XM_003498633.1	A4FU01	Transport	271	8.3505	649	31.4423	423	32.1663	3.85203	1.94562	1.02303	0.032847
RSPH3	radial spoke 3 homolog (Chlamydomonas)	XM_003507575.1	Q86UC2	Transport	191	6.54474	410	22.0886	179	15.1367	2.3128	1.20964	0.68527	-0.545256
ABCC3	ATP binding cassette subfamily C member 3	XM_003501381.1	O15438	Transport	647	10.0014	878	21.3392	525	20.0279	2.0025	1.0018	0.938549	-0.0914957
NRP2	neuropilin 2	XM_003502115.1	O60462	Transport	496.667	8.17902	739.667	19.1513	434.5	17.6581	2.15895	1.11033	0.922032	-0.117111
ZFYVE9	zinc finger FYVE-type containing 9	XM_003496503.1	O95405	Transport	564.5	9.94571	672.333	18.6244	492.667	21.4212	2.15381	1.10689	1.15017	0.201843
ZFYVE9	zinc finger FYVE-type containing 9	XM_003496501.1	O95405	Transport	603	10.2201	707.833	18.8624	508.167	21.2551	2.07973	1.0564	1.12685	0.1723
APBA3	amyloid beta precursor protein binding family A member 3	XM_003506449.1	O96018	Transport	792	36.2317	974	70.0565	683	77.1086	2.12821	1.08964	1.10066	0.138372
GDI1	GDP dissociation inhibitor 1	XM_003512283.1	P31150	Transport	1196.33	43.0885	1986.23	112.477	1044.69	92.8569	2.15502	1.1077	0.82556	-0.276555
DDHD1	DDHD domain containing 1	XM_003510725.1	Q8NEL9	Transport	872	31.711	870	49.7437	756	67.8474	2.13955	1.09731	1.36394	0.447779
SCFD1	sec1 family domain containing 1	XM_003499173.1	Q8WVM8	Transport	618	23.4015	888	52.8681	519	48.4999	2.07251	1.05138	0.917374	-0.124417
SGSM3	small G protein signaling modulator 3	XM_003507466.1	Q96HU1	Transport	1175	35.1759	1521	71.5917	1014	74.9141	2.1297	1.09065	1.04641	0.0654453
SLC38A2	solute carrier family 38 member 2	XM_003510474.1	Q96QD8	Transport	3416	62.3426	4043	116.01	2798	126.018	2.02138	1.01534	1.08627	0.119378
WDR24	WD repeat domain 24	XM_003501560.1	Q96S15	Transport	751	24.5808	959	49.3515	631	50.9686	2.07352	1.05208	1.03277	0.046517
GRWD1	glutamate-rich WD repeat containing 1	XM_003512191.1	Q9BQ67	Transport	1062	42.693	1371	86.6554	936	92.8595	2.17505	1.12105	1.07159	0.0997597
ITSN2	intersectin 2	XM_003497008.1	Q9NZM3	Transport	1001.5	15.8986	1044	26.0577	817.5	32.0269	2.01444	1.01038	1.22908	0.297577
AP4E1	adaptor related protein complex 4 epsilon 1 subunit	XM_003497813.1	Q9UPM8	Transport	272	6.35422	400	14.6919	231	13.3175	2.09585	1.06754	0.906451	-0.141699
TOPORS	E3 ubiquitin-protein ligase Topors;TOPORS;ortholog	XM_003505968.1	Q9NS56	Transport	1673	37.5919	1760	62.178	1387	76.9118	2.04597	1.03278	1.23696	0.3068
VILL	villin-like	XM_003496263.1	O15195	Cytoskeletal Organization	565	17.2815	700	33.6633	557	42.0442	2.4329	1.28268	1.24896	0.32073
RAPGEF3	Rap guanine nucleotide exchange factor 3	XM_003513068.1	O95398	Cytoskeletal Organization	294	7.62678	565	23.0445	293	18.7577	2.45945	1.29834	0.813976	-0.296942
PCNT	pericentrin	XM_003500590.1	O95613	Cytoskeletal Organization	4320	37.0109	5362	72.2269	3621	76.5584	2.06853	1.04861	1.05997	0.0840248
MAP1B	microtubule associated protein 1B	XM_003503691.1	P46821	Cytoskeletal Organization	11030	74.3376	16089	170.486	10910	181.458	2.441	1.28747	1.06436	0.0899843
ACTR2	ARP2 actin-related protein 2 homolog (yeast)	XM_003498102.1	P61160	Cytoskeletal Organization	4582.07	163.172	9623.46	538.816	5423.18	476.601	2.92085	1.54639	0.884535	-0.177009
DST	dystonin	XM_003507907.1	Q03001	Cytoskeletal Organization	4798.5	23.4571	8206.5	63.0743	4912.5	59.2638	2.52648	1.33713	0.939587	-0.0899018
DST	dystonin	XM_003507906.1	Q03001	Cytoskeletal Organization	5478.5	19.4664	9770.5	54.5841	5587.5	48.9959	2.51695	1.33167	0.897621	-0.155822
IFFO1	intermediate filament family orphan 1	XM_003496048.1	Q0D2I5	Cytoskeletal Organization	437	20.0263	709	51.0848	524	59.261	2.95916	1.56519	1.16005	0.214189
IFFO1	intermediate filament family orphan 1	XM_003496049.1	Q0D2I5	Cytoskeletal Organization	443	20.5882	693	50.6377	502	57.5754	2.79652	1.48363	1.13701	0.18524
PAK1	p21 protein (Cdc42/Rac)-activated kinase 1	XM_003511013.1	Q13153	Cytoskeletal Organization	546	21.9607	653	41.2946	538	53.4016	2.43169	1.28196	1.29319	0.370931
PCM1	pericentriolar material 1	XM_003497578.1	Q15154	Cytoskeletal Organization	3037	34.0912	3506	61.8779	2488	68.9233	2.02173	1.01559	1.11386	0.155568
TBCE	tubulin folding cofactor E	XM_003509881.1	Q15813	Cytoskeletal Organization	1305.5	57.4258	2439	168.682	1980	214.938	3.74288	1.90415	1.27422	0.349619
TBCC	tubulin folding cofactor C	XM_003506065.1	Q15814	Cytoskeletal Organization	330.383	21.0596	612.386	61.3738	376.117	59.1661	2.80946	1.49029	0.964028	-0.0528525
CCDC88A	coiled-coil domain containing 88A	XM_003503978.1	Q3V6T2	Cytoskeletal Organization	1044	14.8765	3037	68.041	2666	93.7515	6.30199	2.65581	1.37787	0.462438
KLHL17	kelch like family member 17	XM_003514607.1	Q6TDP4	Cytoskeletal Organization	184	7.55077	600	38.7125	295	29.8754	3.9566	1.98426	0.771726	-0.37384
MICAL1	microtubule associated monooxygenase, calponin and LIM domain containing 1	XM_003497004.1	Q8TDZ2	Cytoskeletal Organization	2238	54.0585	3296	125.175	2193	130.726	2.41822	1.27395	1.04434	0.0625974
PPP1R16A	protein phosphatase 1 regulatory subunit 16A	XM_003515881.1	Q96I34	Cytoskeletal Organization	847	26.2942	1425	69.5533	1052	80.5956	3.06514	1.61595	1.15876	0.212581
C16orf45	chromosome 16 open reading frame 45	XM_003502742.1	Q96MC5	Cytoskeletal Organization	593	26.9406	896.5	64.0367	552.5	61.9446	2.2993	1.20119	0.967329	-0.0479213
CYTH2	cytohesin 2	XM_003512193.1	Q99418	Cytoskeletal Organization	561	38.8339	848	92.2932	560	95.6652	2.46345	1.30068	1.03654	0.0517704
NUAK2	NUAK family kinase 2	XM_003501202.1	Q9H093	Cytoskeletal Organization	101	4.1971	213	13.9166	215	22.0488	5.25334	2.39323	1.58435	0.663891
PCLO	piccolo presynaptic cytomatrix protein	XM_003511624.1	Q9Y6V0	Cytoskeletal Organization	129	0.841173	556	5.70028	202	3.25061	3.86438	1.95024	0.570255	-0.810322
CDC42EP3	CDC42 effector protein 3	XM_003507854.1	Q9UKI2	Cytoskeletal Organization	740	28.4582	878	53.0879	715	67.8578	2.38447	1.25367	1.27821	0.35413
ZGRF1	protein ZGRF1	XM_003512774.1	Q6ZU11	None	866	11.9663	1437	31.2193	866	29.5309	2.46785	1.30325	0.945918	-0.0802133
C4orf47	chromosome 4 open reading frame 47	XM_003509818.1	A7E2U8	None	179	9.03169	235	18.6427	161	20.0475	2.21968	1.15035	1.07535	0.104808
RNF223	ring finger protein 223	XM_003509956.1	E7ERA6	None	434	17.2711	2096	131.144	1048	102.922	5.95922	2.57512	0.784806	-0.349592
GTPBP6	GTP binding protein 6 (putative)	XM_003514316.1	O43824	None	140	7.90267	479	42.5116	279	38.8658	4.91806	2.29809	0.914242	-0.129353
MFSD11	major facilitator superfamily domain containing 11	XM_003498829.1	O43934	None	1244	41.4914	2801	146.885	1699	139.846	3.37047	1.75295	0.952078	-0.0708483
CEP104	centrosomal protein 104kDa	XM_003514096.1	O60308	None	729	23.0574	1253	62.3102	657	51.2821	2.22411	1.15323	0.823013	-0.281013
GPANK1	G-patch domain and ankyrin repeats 1	XM_003508483.1	O95872	None	1289	81.3109	1412	140.041	1262	196.459	2.41615	1.27271	1.40287	0.48838
RBM34	RNA binding motif protein 34	XM_003496799.1	P42696	None	576	35.5668	981	95.2394	651	99.2022	2.78918	1.47984	1.04161	0.0588123
ABHD18	abhydrolase domain containing 18	XM_003504851.1	Q0P651	None	121	4.70837	482	29.4888	289	27.7524	5.89428	2.55931	0.941116	-0.0875558
FAM50A	family with sequence similarity 50 member A	XM_003512277.1	Q14320	None	567	43.9098	1179	143.555	802	153.275	3.49067	1.80351	1.06771	0.0945183
CCDC142	coiled-coil domain containing 142	XM_003511142.1	Q17RM4	None	156	5.28577	408	21.7355	222	18.5633	3.51193	1.81227	0.854054	-0.227602
FAM98C	family with sequence similarity 98 member C	XM_003503834.1	Q17RN3	None	174	17.6038	238	37.8583	194	48.4371	2.75151	1.46022	1.27943	0.355503
FILIP1L	filamin A interacting protein 1-like	XM_003504871.1	Q4L180	None	122	2.46101	520	16.4924	271	13.4909	5.48185	2.45466	0.818009	-0.289811
GRIPAP1	GRIP1 associated protein 1	XM_003505116.1	Q4V328	None	1229	38.3189	1936	94.9056	1388	106.799	2.78712	1.47878	1.12532	0.170336
TTC39A	tetratricopeptide repeat domain 39A	XM_003496489.1	Q5SRH9	None	332	13.4012	695	44.1079	321	31.9764	2.38608	1.25464	0.724957	-0.464032
GPATCH4	G-patch domain containing 4	XM_003502906.1	Q5T3I0	None	792	35.0728	1198	83.4119	767	83.8221	2.38995	1.25698	1.00492	0.00707842
IER5L	immediate early response 5-like	XM_003514276.1	Q5T953	None	176	22.1512	295	58.3758	223	69.2641	3.12687	1.64472	1.18652	0.246737
WDR25	WD repeat domain 25	XM_003503712.1	Q64LD2	None	146	7.16061	436	33.6209	226	27.3542	3.82009	1.93361	0.813606	-0.297598
HEATR6	HEAT repeat containing 6	XM_003510622.1	Q6AI08	None	640	13.5656	1016	33.8594	590	30.8624	2.27505	1.1859	0.911487	-0.133706
KIAA1841	KIAA1841	XM_003511317.1	Q6NSI8	None	739	15.0496	1249	39.9917	770	38.6981	2.57137	1.36254	0.967655	-0.0474353
MSANTD2	Myb/SANT DNA binding domain containing 2	XM_003514725.1	Q6P1R3	None	318	13.8644	1125	77.1174	584	62.8355	4.53214	2.18019	0.814803	-0.295477
CCDC174	coiled-coil domain containing 174	XM_003495172.1	Q6PII3	None	433	20.7466	507	38.1938	452	53.4461	2.57613	1.36521	1.39934	0.484745
CASC1	cancer susceptibility candidate 1	XM_003498811.1	Q6TDU7	None	519	14.9694	1103	50.0194	562	40.0029	2.67231	1.41809	0.799748	-0.322383
ANKRD12	ankyrin repeat domain 12	XM_003508390.1	Q6UB98	None	869	11.3162	3301.5	67.5954	1932.5	62.1038	5.48805	2.45629	0.918757	-0.122245
ANKRD12	ankyrin repeat domain 12	XM_003508389.1	Q6UB98	None	884	11.3819	3342.5	67.6644	1957.5	62.199	5.46472	2.45015	0.919227	-0.121507
PET117	PET117 homolog	XM_003496468.1	Q6UWS5	None	114	28.5593	104	40.9639	100	61.8245	2.16478	1.11422	1.50924	0.593824
C11orf57	chromosome 11 open reading frame 57	XM_003498533.1	Q6ZUT1	None	630	56.7531	1022	144.752	792	176.073	3.10243	1.6334	1.21637	0.282585
C3orf67	chromosome 3 open reading frame 67	XM_003510230.1	Q6ZVT6	None	532	18.9621	902	50.5484	760	66.8509	3.52549	1.81783	1.32251	0.40328
CCDC84	coiled-coil domain containing 84	XM_003511565.1	Q86UT8	None	230	15.025	770	79.0865	493	79.4787	5.28977	2.40321	1.00496	0.00713705
FAM35A	family with sequence similarity 35 member A	XM_003495323.1	Q86V20	None	1031	22.9442	1605	56.1584	1143	62.7738	2.73593	1.45203	1.1178	0.16066
MICU3	mitochondrial calcium uptake family member 3	XM_003497595.1	Q86XE3	None	157	9.23897	308	28.4971	155	22.5099	2.43641	1.28476	0.789902	-0.340254
AHNAK2	AHNAK nucleoprotein 2	XM_003498766.1	Q8IVF2	None	311	19.9045	1816	182.739	1168	184.481	9.26831	3.21231	1.00953	0.0136839
ZC3H7A	zinc finger CCCH-type containing 7A	XM_003496693.1	Q8IWR0	None	3091	66.3193	4823	162.699	3635	192.47	2.90217	1.53713	1.18299	0.242432
FAM71E2	family with sequence similarity 71 member E2	XM_003508242.1	Q8N5Q1	None	110	4.33809	289	17.9196	230	22.3847	5.16004	2.36738	1.24917	0.320972
TEX9	testis expressed 9	XM_003495062.1	Q8N6V9	None	226	8.48051	371	21.8884	254	23.5215	2.7736	1.47176	1.07461	0.103817
TMEM87A	transmembrane protein 87A	XM_003498054.1	Q8NBN3	None	610	18.5144	859	40.9919	574	42.9942	2.3222	1.21549	1.04884	0.0688005
TMEM87A	transmembrane protein 87A	XM_003498053.1	Q8NBN3	None	637	19.3562	871	41.6126	576	43.1938	2.23152	1.15803	1.038	0.0538039
MROH1	maestro heat like repeat family member 1	XM_003507639.1	Q8NDA8	None	1003	15.7076	2409	59.3159	1142	44.136	2.80985	1.49049	0.744083	-0.426464
BOD1L1	biorientation of chromosomes in cell division 1 like 1	XM_003507958.1	Q8NFC6	None	3753	31.5706	7661	101.325	4560	94.6644	2.9985	1.58424	0.934268	-0.098091
CXorf38	chromosome X open reading frame 38	XM_003495362.1	Q8TB03	None	1265.5	45.025	1538	86.0347	1189.5	104.442	2.31964	1.2139	1.21395	0.279708
MIPOL1	mirror-image polydactyly 1	XM_003511023.1	Q8TD10	None	307	19.8741	681	69.3142	488	77.9627	3.92283	1.97189	1.12477	0.169634
PNISR	PNN-interacting serine/arginine-rich protein	XM_003503702.1	Q8TF01	None	1136	37.3525	2830	146.303	2166	175.759	4.70542	2.23432	1.20134	0.264639
CCDC107	coiled-coil domain containing 107	XM_003504989.1	Q8WV48	None	103	14.1113	142	30.5875	161	54.4345	3.85751	1.94767	1.77963	0.831578
C12orf43	chromosome 12 open reading frame 43	XM_003503535.1	Q96C57	None	240	24.2812	405	64.4227	232	57.9248	2.38558	1.25434	0.899136	-0.153389
SAAL1	serum amyloid A like 1	XM_003514306.1	Q96ER3	None	144	11.0112	460	55.304	295	55.669	5.05566	2.3379	1.0066	0.00948894
HSPBAP1	HSPB1 associated protein 1	XM_003495444.1	Q96EW2	None	150	8.03603	254	21.3949	177	23.4014	2.91206	1.54204	1.09378	0.129329
CEP95	centrosomal protein 95kDa	XM_003501875.1	Q96GE4	None	1098	33.3644	1830	87.4295	1037	77.7639	2.33074	1.22079	0.889447	-0.16902
WDR90	WD repeat domain 90	XM_003501520.1	Q96KV7	None	1489	20.6217	2921	63.6045	1540	52.6343	2.55237	1.35184	0.827526	-0.273124
CCDC138	coiled-coil domain containing 138	XM_003503758.1	Q96M89	None	142.238	5.78585	523.57	33.4851	296.313	29.7454	5.14105	2.36206	0.888317	-0.170853
COQ10A	coenzyme Q10A	XM_003506218.1	Q96MF6	None	1111	69.6372	1287	126.833	1107	171.235	2.45896	1.29805	1.35009	0.433051
C5orf34	chromosome 5 open reading frame 34	XM_003504948.1	Q96MH7	None	182	6.77148	236	13.8054	187	17.1701	2.53564	1.34235	1.24372	0.314659
FAM193B	family with sequence similarity 193 member B	XM_003498148.1	Q96PV7	None	598	14.8398	2477	96.6446	1209	74.0406	4.98934	2.31885	0.766113	-0.384372
PRR14	proline rich 14	XM_003511746.1	Q9BWN1	None	475	18.3117	782.5	47.4291	476	45.2856	2.47304	1.30629	0.954805	-0.0667213
PRR14	proline rich 14	XM_003511747.1	Q9BWN1	None	523	21.507	841.5	54.4074	515	52.2641	2.4301	1.28101	0.960606	-0.057983
ZCWPW1	zinc finger CW-type and PWWP domain containing 1	XM_003510638.1	Q9H0M4	None	134	5.57724	219	14.3313	135	13.8665	2.48626	1.31398	0.967569	-0.0475636
PCED1A	PC-esterase domain containing 1A	XM_003499041.1	Q9H1Q7	None	1413	66.9299	2803	208.75	2183	255.182	3.81267	1.9308	1.22243	0.289748
DNAJC25	DnaJ heat shock protein family (Hsp40) member C25	XM_003510574.1	Q9H1X3	None	403	24.7104	564	54.3725	499	75.508	3.05572	1.61151	1.38872	0.473753
ZCCHC4	zinc finger CCHC-type containing 4	XM_003511229.1	Q9H5U6	None	375	19.2661	680	54.9283	417	52.8708	2.74424	1.45641	0.962541	-0.0550795
NRDE2	NRDE-2, necessary for RNA interference, domain containing	XM_003501391.1	Q9H7Z3	None	760	16.4675	793	27.0154	695	37.1634	2.25678	1.17427	1.37564	0.4601
KIAA1551	KIAA1551	XM_003512865.1	Q9HCM1	None	3365	50.5222	4936	116.519	3954	146.505	2.89981	1.53596	1.25734	0.330378
CWC25	CWC25 spliceosome-associated protein homolog	XM_003499575.1	Q9NXE8	None	916	37.8852	1053	68.4745	933	95.2301	2.51365	1.32978	1.39074	0.475851
WRAP73	WD repeat containing, antisense to TP73	XM_003513448.1	Q9P2S5	None	483	36.4044	698	82.7156	499	92.8164	2.5496	1.35027	1.12212	0.166221
ANKRD26	ankyrin repeat domain 26	XM_003504266.1	Q9UPS8	None	1719	25.6821	3481	81.7682	2579	95.0876	3.70249	1.88849	1.16289	0.217718
TSSC4	tumor suppressing subtransferable candidate 4	XM_003508076.1	Q9Y5U2	None	533	37.8247	1265	141.145	1075	188.267	4.97736	2.31538	1.33386	0.415607
RNF215	ring finger protein 215	XM_003509023.1	Q9Y6U7	None	762	38.6454	1159	92.4171	863	108.012	2.79495	1.48282	1.16874	0.22496
PRORSD1P	prolyl-tRNA synthetase associated domain containing 1, pseudogene	XM_003503977.1	A6NEY8	None	125.5	12.8954	153	24.7177	108.5	27.5131	2.13356	1.09326	1.11309	0.154571
ZBTB5	zinc finger and BTB domain containing 5	XM_003504794.1	O15062	None	332	13.0151	485	29.8935	277	26.7983	2.05902	1.04196	0.896459	-0.157691
FYB	FYN binding protein	XM_003503097.1	O15117	None	438	11.5099	373	15.411	361	23.4112	2.034	1.02432	1.51911	0.603231
TRAF3IP2	TRAF3 interacting protein 2	XM_003504914.1	O43734	None	633	23.8778	861	51.0646	524	48.7799	2.04289	1.03061	0.955257	-0.0660386
EIF1B	eukaryotic translation initiation factor 1B	XM_003509062.1	O60739	None	528	50.2006	510	76.2379	468	109.809	2.18741	1.12922	1.44035	0.526419
SORBS2	sorbin and SH3 domain containing 2	XM_003509821.1	O94875	None	158	3.34273	222	7.38453	133	6.94407	2.07736	1.05475	0.940353	-0.0887256
ABHD16A	abhydrolase domain containing 16A	XM_003508506.1	O95870	None	920	45.8338	1248	97.7548	807	99.2177	2.16473	1.11419	1.01497	0.0214305
ACP5	acid phosphatase 5, tartrate resistant	XM_003499760.1	P13686	None	160	11.6693	172	19.7233	136	24.4784	2.09767	1.06879	1.24109	0.311606
AGL	amylo-alpha-1, 6-glucosidase, 4-alpha-glucanotransferase	XM_003513213.1	P35573	None	1900.31	26.0303	3057.98	65.8591	1589.25	53.7235	2.06388	1.04536	0.815733	-0.293831
ELAVL2	ELAV like neuron-specific RNA binding protein 2	XM_003507901.1	Q12926	None	264	5.73445	226.667	7.74107	216.667	11.6144	2.02538	1.01819	1.50036	0.585313
SHPRH	SNF2 histone linker PHD RING helicase	XM_003508019.1	Q149N8	None	920.5	14.2768	1193.5	29.1041	751.5	28.7642	2.01476	1.01061	0.988323	-0.0169457
SHPRH	SNF2 histone linker PHD RING helicase	XM_003508018.1	Q149N8	None	955.5	14.9875	1221.5	30.1244	775.5	30.0192	2.00295	1.00212	0.996508	-0.00504733
USF2	upstream transcription factor 2, c-fos interacting	XM_003515309.1	Q15853	None	467	57.6725	653	126.792	383	116.726	2.02395	1.01717	0.920615	-0.119331
TATDN3	TatD DNase domain containing 3	XM_003508418.1	Q17R31	None	118	11.5388	265	40.7428	105	25.3388	2.19596	1.13485	0.621922	-0.685195
TBRG1	transforming growth factor beta regulator 1	XM_003514368.1	Q3YBR2	None	900	48.5457	900	76.3268	744	99.0375	2.04009	1.02863	1.29755	0.375785
KIAA2026	KIAA2026	XM_003510227.1	Q5HYC2	None	1540	19.0721	2479	48.2702	1251	38.2342	2.00472	1.0034	0.792087	-0.336269
CEP85L	centrosomal protein 85kDa-like	XM_003510591.1	Q5SZL2	None	189	5.56104	175	8.09577	167	12.1263	2.18058	1.12471	1.49786	0.582901
LYSMD4	LysM domain containing 4	XM_003499398.1	Q5XG99	None	189	13.6332	197	22.3423	160	28.4822	2.08918	1.06294	1.27481	0.350284
IQCE	IQ motif containing E	XM_003496294.1	Q6IPM2	None	367	12.1891	458	23.9165	324	26.5564	2.1787	1.12347	1.11038	0.151054
CENPP	centromere protein P	XM_003505349.1	Q6IPU0	None	147	12.5004	168	22.4616	130	27.2814	2.18245	1.12595	1.21458	0.280458
RSBN1L	round spermatid basic protein 1-like	XM_003504434.1	Q6PCB5	None	723	20.1892	789	34.6405	594	40.9341	2.02752	1.01972	1.18168	0.240845
ZBTB49	zinc finger and BTB domain containing 49	XM_003496629.1	Q6ZSB9	None	281	9.72578	517	28.1342	250	21.3538	2.19559	1.13461	0.759	-0.397828
NOL8	nucleolar protein 8	XM_003505348.1	Q76FK4	None	2368	42.6931	2837.5	80.4337	1945	86.5394	2.02701	1.01935	1.07591	0.105558
TRAPPC11	trafficking protein particle complex 11	XM_003495469.1	Q7Z392	None	1724	28.0337	2504	64.0181	1473	59.1103	2.10855	1.07625	0.923338	-0.115069
POGZ	pogo transposable element with ZNF domain	XM_003498676.1	Q7Z3K3	None	898.5	13.1841	1634	37.6973	771	27.9193	2.11765	1.08246	0.740619	-0.433197
POGZ	pogo transposable element with ZNF domain	XM_003498675.1	Q7Z3K3	None	925.5	13.5124	1670	38.3354	785	28.2843	2.0932	1.06571	0.737812	-0.438676
C6orf1	chromosome 6 open reading frame 1	XM_003506295.1	Q86T20	None	318	43.4162	507	108.833	281	94.6781	2.18071	1.1248	0.869943	-0.201008
PABPN1	poly(A) binding protein, nuclear 1	XM_003506130.1	Q86U42	None	1822	76.9705	2470	164.059	1549	161.49	2.09808	1.06907	0.984344	-0.0227661
FAM160B2	family with sequence similarity 160 member B2	XM_003496192.1	Q86V87	None	1048	26.799	1401	56.3276	862	54.3979	2.02985	1.02137	0.965743	-0.0502893
NRAP	nebulin related anchoring protein	XM_003515844.1	Q86VF7	None	128	10.588	226	29.3927	110	22.4551	2.12081	1.08461	0.76397	-0.388411
DDIAS	DNA damage induced apoptosis suppressor	XM_003507016.1	Q8IXT1	None	675	16.991	777	30.7512	599	37.21	2.18998	1.13092	1.21004	0.275049
CENPL	centromere protein L	XM_003497663.1	Q8N0S6	None	412	18.6532	387	27.5481	336	37.5416	2.01261	1.00907	1.36276	0.446536
SPICE1	spindle and centriole associated protein 1	XM_003497858.1	Q8N0Z3	None	218	5.17079	304	11.337	180	10.5364	2.03767	1.02692	0.929375	-0.105667
NKAP	NFKB activating protein	XM_003500025.1	Q8N5F7	None	472.5	33.5011	534	59.5285	404	70.6899	2.11007	1.07729	1.1875	0.247923
DTX3	deltex 3, E3 ubiquitin ligase	XM_003507526.1	Q8N9I9	None	515	37.285	760	86.5099	436	77.8988	2.08928	1.06301	0.900462	-0.151263
KRI1	KRI1 homolog	XM_003499771.1	Q8N9T8	None	1471.5	55.3751	2218	131.233	1302	120.916	2.18358	1.12669	0.921386	-0.118122
CCDC112	coiled-coil domain containing 112	XM_003506775.1	Q8NEF3	None	767	28.0737	665	38.2694	625	56.455	2.01096	1.00788	1.4752	0.56091
KIAA1524	KIAA1524	XM_003500075.1	Q8TCG1	None	1204	34.8413	1238	56.3267	1043	74.4852	2.13784	1.09616	1.32238	0.403136
SPPL2B	signal peptide peptidase like 2B	XM_003502629.1	Q8TCT7	None	1196	42.5907	1815	101.621	1017	89.3763	2.09849	1.06935	0.879502	-0.185242
ELP5	elongator acetyltransferase complex subunit 5	XM_003497250.1	Q8TE02	None	953	61.999	859	87.864	778	124.908	2.01467	1.01055	1.4216	0.50752
NSUN6	NOP2/Sun RNA methyltransferase family member 6	XM_003503382.1	Q8TEA1	None	442	17.625	511	32.0371	368	36.2137	2.05468	1.03891	1.13037	0.17679
C7orf43	chromosome 7 open reading frame 43	XM_003510407.1	Q8WVR3	None	251	13.7265	508	43.6793	218	29.4213	2.14339	1.09989	0.673574	-0.570093
NAT6	N-acetyltransferase 6	XM_003500402.1	Q93015	None	326	25.074	418	50.5484	286	54.2862	2.16504	1.1144	1.07394	0.10292
SLC7A6OS	solute carrier family 7 member 6 opposite strand	XM_003504309.1	Q96CW6	None	931	59.6822	854	86.0753	779	123.24	2.06493	1.04609	1.43177	0.517795
SPG11	spastic paraplegia 11 (autosomal recessive)	XM_003498070.1	Q96JI7	None	835.5	9.13445	1620.5	27.8555	700	18.8865	2.06761	1.04797	0.678018	-0.560604
SERAC1	serine active site containing 1	XM_003502812.1	Q96JX3	None	246.5	6.11129	532	20.7374	211.5	12.9403	2.11744	1.08232	0.624009	-0.680361
SERAC1	serine active site containing 1	XM_003502811.1	Q96JX3	None	264.5	6.37724	552	20.9253	216.5	12.882	2.01999	1.01435	0.615618	-0.699893
SETDB2	SET domain bifurcated 2	XM_003514486.1	Q96T68	None	149.5	4.80163	314	15.8563	124.5	9.86814	2.05516	1.03925	0.622346	-0.684211
UTP14A	UTP14A small subunit processome component	XM_003515717.1	Q9BVJ6	None	280	10.33	319	18.5037	239	21.76	2.10648	1.07484	1.17598	0.233862
NUSAP1	nucleolar and spindle associated protein 1	XM_003498063.1	Q9BXS6	None	511.5	31.2176	407.5	39.1028	444	66.8737	2.14218	1.09908	1.7102	0.774167
NUSAP1	nucleolar and spindle associated protein 1	XM_003498065.1	Q9BXS6	None	423	28.9009	319	34.2679	359	60.5318	2.09446	1.06658	1.76643	0.820835
ASPSCR1	alveolar soft part sarcoma chromosome region, candidate 1	XM_003496899.1	Q9BZE9	None	737.5	35.4871	962	72.7796	599	71.1302	2.00439	1.00317	0.977336	-0.033073
ASPSCR1	alveolar soft part sarcoma chromosome region, candidate 1	XM_003496900.1	Q9BZE9	None	580.5	30.2373	788	64.5345	492	63.2446	2.09161	1.06461	0.980011	-0.0291295
RAB34	RAB34, member RAS oncogene family	XM_003513828.1	Q9BZG1	None	966	55.4809	985	88.9464	808	114.524	2.0642	1.04558	1.28756	0.364639
RAB34	RAB34, member RAS oncogene family	XM_003513827.1	Q9BZG1	None	1034	52.4739	1098	87.6094	872	109.209	2.0812	1.05742	1.24654	0.31793
MROH8	maestro heat like repeat family member 8	XM_003497119.1	Q9H579	None	293	7.35424	571	22.5337	251	15.5476	2.11409	1.08004	0.689969	-0.535396
C5orf42	chromosome 5 open reading frame 42	XM_003503989.1	Q9H799	None	2299	18.3943	3276	41.211	1887	37.2592	2.02559	1.01834	0.904108	-0.145433
METTL8	methyltransferase like 8	XM_003495948.1	Q9H825	None	153.31	6.8623	270.624	19.0455	132.443	14.6301	2.13195	1.09218	0.768166	-0.380511
CAAP1	caspase activity and apoptosis inhibitor 1	XM_003503215.1	Q9H8G2	None	492	19.931	559	35.6042	403	40.2891	2.02143	1.01537	1.13158	0.178339
PIDD1	p53-induced death domain protein 1	XM_003509765.1	Q9HB75	None	1534	41.9452	2080	89.4223	1266	85.4296	2.0367	1.02623	0.95535	-0.0658983
TNRC6C	trinucleotide repeat containing 6C	XM_003498825.1	Q9HCJ0	None	1150	11.0041	1502	22.5971	939	22.1738	2.01505	1.01082	0.981269	-0.0272799
FANCF	Fanconi anemia complementation group F	XM_003505032.1	Q9NPI8	None	238.5	11.8371	647.333	50.5137	208.833	25.5784	2.16087	1.11162	0.506366	-0.981749
GPR108	G protein-coupled receptor 108	XM_003501777.1	Q9NPR9	None	259	11.3108	293	20.1182	220.167	23.7282	2.09783	1.0689	1.17944	0.238103
GPR108	G protein-coupled receptor 108	XM_003501776.1	Q9NPR9	None	293	11.9616	323.5	20.7645	238.667	24.0453	2.01021	1.00735	1.158	0.211639
C1orf112	chromosome 1 open reading frame 112	XM_003508283.1	Q9NSG2	None	1084	31.4379	1586	72.3192	924	66.1324	2.10359	1.07285	0.914452	-0.12902
RBM28	RNA binding motif protein 28	XM_003497512.1	Q9NW13	None	813	29.2021	820.867	46.3576	660.733	58.5689	2.00564	1.00407	1.26341	0.337328
LYAR	Ly1 antibody reactive	XM_003496630.1	Q9NX58	None	1609	85.3308	1789	149.172	1326	173.545	2.03379	1.02417	1.16339	0.218335
TXNDC16	thioredoxin domain containing 16	XM_003512007.1	Q9P2K2	None	190	5.15954	317	13.5345	157	10.5214	2.03922	1.02802	0.777379	-0.36331
NFKBIL1	NFKB inhibitor like 1	XM_003508510.1	Q9UBC1	None	478	27.5133	675	61.0865	399	56.6769	2.05998	1.04263	0.927815	-0.108091
MED23	mediator complex subunit 23	XM_003513090.1	Q9ULK4	None	539.5	10.306	754	22.6462	450.5	21.2379	2.06073	1.04316	0.937812	-0.0926296
MED23	mediator complex subunit 23	XM_003513091.1	Q9ULK4	None	549.5	10.5429	757	22.8358	451.5	21.3781	2.02772	1.01986	0.936169	-0.0951595
ZNF148	zinc finger protein 148	XM_003495409.1	Q9UQR1	None	1165	24.6672	1276	42.4786	977	51.0512	2.0696	1.04935	1.20181	0.26521
NINL	ninein like	XM_003499957.1	Q9Y2I6	None	1130	21.2772	1636	48.4333	1009	46.8861	2.20359	1.13986	0.968055	-0.0468387
AKR7A3	Aflatoxin B1 aldehyde reductase member 3;AKR7A3;ortholog	XM_003506887.1	O95154	None	130.833	10.366	597.5	74.4316	341	66.6755	6.43212	2.68529	0.895795	-0.158759
RPS26	40S ribosomal protein S26;RPS26;ortholog	XM_003499935.1	P62854	None	185.917	42.1592	202.917	72.3464	198.917	111.317	2.64041	1.40076	1.53867	0.621685
INTS6L	integrator complex subunit 6-like	XM_003499829.1	Q5JSJ4	None	1546	37.5041	3593	137.041	2035	121.829	3.24843	1.69974	0.888995	-0.169752
ZNF709	Zinc finger protein 709;ZNF709;ortholog	XM_003506998.1	Q8N972	None	186	7.64477	384	24.8147	222.5	22.5683	2.95213	1.56176	0.909476	-0.136893
ZNF709	Zinc finger protein 709;ZNF709;ortholog	XM_003499090.1	Q8N972	None	548.5	15.2248	1194	52.1082	556	38.0863	2.50159	1.32285	0.730908	-0.452238
ZNF709	Zinc finger protein 709;ZNF709;ortholog	XM_003506999.1	Q8N972	None	107	3.93833	489	28.2985	222	20.165	5.1202	2.3562	0.712585	-0.488867
ZNF709	Zinc finger protein 709;ZNF709;ortholog	XM_003504712.1	Q8N972	None	302	11.2468	659.333	38.6058	390	35.843	3.18695	1.67218	0.928436	-0.107126
TRIM47	Tripartite motif-containing protein 47;TRIM47;ortholog	XM_003506833.1	Q96LD4	None	1176	64.8516	1462	126.761	1034	140.719	2.16986	1.1176	1.11011	0.150701
BRD8	Bromodomain-containing protein 8;BRD8;ortholog	XM_003502522.1	Q9H0E9	None	329.5	8.7314	568.5	23.6856	362	23.6731	2.71126	1.43896	0.999471	-0.000762805
BRD8	Bromodomain-containing protein 8;BRD8;ortholog	XM_003502521.1	Q9H0E9	None	392.5	9.50988	654.5	24.9328	416	24.8741	2.6156	1.38714	0.997645	-0.00340182
SGK494	Uncharacterized serine/threonine-protein kinase SgK494;SGK494;ortholog	XM_003514875.1	Q96LW2	None	149	5.57523	434	25.5324	199	18.3759	3.29598	1.72071	0.719707	-0.474519
LYST	lysosomal trafficking regulator	XM_003509883.1	Q99698	None	722	4.92827	1329	14.2629	742	12.4991	2.53621	1.34267	0.876337	-0.190442
SCAPER	S-phase cyclin A-associated protein in the ER	XM_003497930.1	Q9BY12	None	883	16.438	2345	68.637	1428	65.6048	3.99104	1.99676	0.955823	-0.0651841
RASIP1	Ras interacting protein 1	XM_003508661.1	Q5U651	None	250	10.8339	1666	113.513	739	79.0325	7.29495	2.8669	0.696244	-0.522334
SUPT20H	SPT20 homolog, SAGA complex component	XM_003511995.1	Q8NEM7	None	986	31.8628	1316	66.8635	906	72.2526	2.26762	1.18118	1.0806	0.111831
FBXL2	F-box and leucine-rich repeat protein 2	XM_003498579.1	Q9UKC9	None	259	8.9174	687	37.1895	319	27.1049	3.03955	1.60386	0.72883	-0.456346
KTN1	kinectin 1	XM_003500054.1	Q86UP2	None	4172	81.0308	6501	198.524	5082	243.59	3.00613	1.58791	1.22701	0.295143
IZUMO1	izumo sperm-egg fusion 1	XM_003508662.1	Q8IYV9	None	232	18.6057	396	49.932	239	47.3014	2.54231	1.34614	0.947316	-0.078082
