# Supplementary material for: The midbody and midbody remnant are assembly sites for RNA and active translation
Source: Research Square preprint supplement (doi:10.21203/rs.3.rs-2256478/v1), 2022-11-23
Supplement: Supplementary file 26 [file Table 3 Legend.docx]

Table 3: Midbody-enriched transcripts in interphase.

Midbody-enriched transcripts in interphase were identified as the 1051 transcripts that had an enrichment score (RPKM/RPKM) of ≥ 2 when compared to interphase ("Midbody/Interphase Enrichment Score" highlighted in yellow). Colors and GO terms correspond those in Figure 1C and 1D.
