# Supplementary material for: The midbody and midbody remnant are assembly sites for RNA and active translation
Source: Research Square preprint supplement (doi:10.21203/rs.3.rs-2256478/v1), 2022-11-23
Supplement: Supplementary file 31 [file Table 4 - Raw Data from CHO cell RNA Seq.xlsx]

## Sheet: CHOMidbodiesandMicrotubulesAllD
Refseq Accession Number	Metaphase.Reads	Metaphase.RPKM	Midbody.Reads	Midbody.RPKM	Interphase.Reads	Interphase.RPKM	Human.Uniprot.ID	BlastX.evalue	Mb/Int Enrichment Score	Mb/Meta Enrichment Score	Log2 Mb/Int Enrichment Score	Log2 Mb/Meta Enrichment Score
XM_003502469.1	3490	123.366	2226	123.506	5441	122.328	P55060	0	1.00964	1.00113	0.0138341	0.0016344
XM_003510762.1	1326	38.4396	843	38.3579	2043	37.6684	Q9H0H0	0	1.0183	0.997875	0.0261677	-0.00306839
XM_003507729.1	3	0.344648	1	0.180321	0	0	P51677	1e-130	#DIV/0!	0.523204	#DIV/0!	-0.934555
XM_003514889.1	3	0.408136	1	0.213538	0	0	Q6P656	2e-125	#DIV/0!	0.523204	#DIV/0!	-0.934555
XM_003514809.1	9	1.16319	4	0.811446	0	0	P33765	1e-116	#DIV/0!	0.697605	#DIV/0!	-0.519517
XM_003512671.1	0	0	0.5	0.0801428	0	0	Q8NGR1	1e-101	#DIV/0!	#DIV/0!	#DIV/0!	#DIV/0!
XM_003497579.1	0	0	1	0.206082	0	0	Q08830	6e-159	#DIV/0!	#DIV/0!	#DIV/0!	#DIV/0!
XM_003512312.1	0	0	1	0.206082	0	0	Q7Z5H5	5e-66	#DIV/0!	#DIV/0!	#DIV/0!	#DIV/0!
XM_003496946.1	2	0.0966304	1	0.0758361	0	0	A4D1F6	0	#DIV/0!	0.784806	#DIV/0!	-0.349592
XM_003508099.1	1	0.297538	1	0.467019	0	0	Q8WYQ3	2e-30	#DIV/0!	1.56961	#DIV/0!	0.650408
XM_003503161.1	0.5	0.0134628	0.25	0.0105657	0	0	O60706	0	#DIV/0!	0.784806	#DIV/0!	-0.349592
XM_003496024.1	0	0	1	0.164344	0	0	Q9NR22	0	#DIV/0!	#DIV/0!	#DIV/0!	#DIV/0!
XM_003509702.1	0	0	1	0.209405	0	0	Q96L15	2e-127	#DIV/0!	#DIV/0!	#DIV/0!	#DIV/0!
XM_003500189.1	1	0.0313317	2	0.0983571	0	0	Q6UXX5	0	#DIV/0!	3.13922	#DIV/0!	1.65041
XM_003511378.1	0	0	1	0.209405	0	0	Q9BPZ2	1e-97	#DIV/0!	#DIV/0!	#DIV/0!	#DIV/0!
XM_003499786.1	14	1.8094	9	1.82575	0	0	Q6IFN5	2e-98	#DIV/0!	1.00904	#DIV/0!	0.0129779
XM_003512601.1	2	0.162506	1	0.127536	0	0	O43278	0	#DIV/0!	0.784806	#DIV/0!	-0.349592
XM_003512008.1	0	0	1	0.178831	0	0	P43116	1e-107	#DIV/0!	#DIV/0!	#DIV/0!	#DIV/0!
XM_003496085.1	0	0	2	0.212838	0	0	Q9NY28	0	#DIV/0!	#DIV/0!	#DIV/0!	#DIV/0!
XM_003512485.1	0	0	1	0.141531	0	0	Q5T1N1	3e-119	#DIV/0!	#DIV/0!	#DIV/0!	#DIV/0!
XM_003505666.1	2	0.0496393	1	0.0389572	0	0	Q7Z4N2	0	#DIV/0!	0.784806	#DIV/0!	-0.349592
XM_003509831.1	1	0.0818966	1	0.128546	0	0	O60353	0	#DIV/0!	1.56961	#DIV/0!	0.650408
XM_003503214.1	18	1.99582	6	1.04422	0	0	Q9NQ60	9e-80	#DIV/0!	0.523204	#DIV/0!	-0.934555
XM_003495123.1	0	0	1	0.149921	0	0	A6NNN8	0	#DIV/0!	#DIV/0!	#DIV/0!	#DIV/0!
XM_003500488.1	4	0.406465	1	0.159498	0	0	Q6UW49	3e-30	#DIV/0!	0.392403	#DIV/0!	-1.34959
XM_003510919.1	1	0.126864	0.5	0.099564	0	0	Q5VUY2	2e-115	#DIV/0!	0.784806	#DIV/0!	-0.349592
XM_003514645.1	0	0	2	0.205973	0	0	Q13469	0	#DIV/0!	#DIV/0!	#DIV/0!	#DIV/0!
XM_003500263.1	0	0	1	0.158331	0	0	Q8N126	0	#DIV/0!	#DIV/0!	#DIV/0!	#DIV/0!
XM_003508904.1	4	1.74138	1	0.683323	0	0		NA	#DIV/0!	0.392403	#DIV/0!	-1.34959
XM_003499298.1	0	0	0.5	0.132121	0	0	P05976	1e-72	#DIV/0!	#DIV/0!	#DIV/0!	#DIV/0!
XM_003513799.1	2	0.135083	1	0.106014	0	0	Q86UX6	0	#DIV/0!	0.784806	#DIV/0!	-0.349592
XM_003505266.1	2	0.385321	1	0.302402	0	0	Q8IZS6	5e-92	#DIV/0!	0.784806	#DIV/0!	-0.349592
XM_003507426.1	3.5	0.361881	2	0.324578	0	0	P13746	5e-92	#DIV/0!	0.896921	#DIV/0!	-0.156947
XM_003512303.1	0	0	1	0.106769	0	0	Q3SY52	1e-53	#DIV/0!	#DIV/0!	#DIV/0!	#DIV/0!
XM_003513787.1	2.66667	0.201255	2	0.236919	0	0		NA	#DIV/0!	1.17721	#DIV/0!	0.23537
XM_003501689.1	0.2	0.00884029	0.2	0.0138758	0	0	O00712	0	#DIV/0!	1.56961	#DIV/0!	0.650408
XM_003515491.1	1	0.157854	1	0.24777	0	0	O95833	3e-121	#DIV/0!	1.56961	#DIV/0!	0.650408
XM_003514140.1	4	0.667061	1	0.261757	0	0	Q9BPW5	2e-124	#DIV/0!	0.392403	#DIV/0!	-1.34959
XM_003515123.1	4	0.640379	1	0.251287	0	0		NA	#DIV/0!	0.392403	#DIV/0!	-1.34959
XM_003508614.1	2	0.12218	1	0.0958873	0	0	P0C671	7e-104	#DIV/0!	0.784806	#DIV/0!	-0.349592
XM_003514929.1	0	0	1	0.488088	0	0	P01764	7e-49	#DIV/0!	#DIV/0!	#DIV/0!	#DIV/0!
XM_003511910.1	3	0.299694	2	0.313602	0	0	Q6NXR0	6e-60	#DIV/0!	1.04641	#DIV/0!	0.0654453
XM_003508239.1	3	0.186577	1	0.0976176	0	0	Q8TDC3	0	#DIV/0!	0.523204	#DIV/0!	-0.934555
XM_003495688.1	3.5	0.417154	1	0.187077	0	0	P30874	0	#DIV/0!	0.448461	#DIV/0!	-1.15695
XM_003503148.1	5	0.31237	3	0.29418	0	0	Q8NC74	2e-147	#DIV/0!	0.941767	#DIV/0!	-0.0865577
XM_003513030.1	0.5	0.0654396	2	0.410859	0	0	A6NCV1	6e-111	#DIV/0!	6.27845	#DIV/0!	2.65041
XM_003495981.1	1	0.0225342	1	0.03537	0	0	O60242	0	#DIV/0!	1.56961	#DIV/0!	0.650408
XM_003500568.1	0	0	1	0.64273	0	0		NA	#DIV/0!	#DIV/0!	#DIV/0!	#DIV/0!
XM_003515004.1	0	0	2	0.222695	0	0		NA	#DIV/0!	#DIV/0!	#DIV/0!	#DIV/0!
XM_003515139.1	0	0	1	0.426142	0	0	Q8TCC7	1e-50	#DIV/0!	#DIV/0!	#DIV/0!	#DIV/0!
XM_003508110.1	0	0	2	0.192628	0	0	P13866	8e-169	#DIV/0!	#DIV/0!	#DIV/0!	#DIV/0!
XM_003508664.1	3	0.42932	1	0.224622	0	0	Q9BPX1	7e-96	#DIV/0!	0.523204	#DIV/0!	-0.934555
XM_003500553.1	1	0.0763059	1	0.119771	0	0	O95954	0	#DIV/0!	1.56961	#DIV/0!	0.650408
XM_003500232.1	0	0	1	0.232673	0	0	Q9P0V8	3e-119	#DIV/0!	#DIV/0!	#DIV/0!	#DIV/0!
XM_003501691.1	0.2	0.00970081	0.2	0.0152265	0	0	O00712	0	#DIV/0!	1.56961	#DIV/0!	0.650408
XM_003508336.1	2	0.187139	1	0.146868	0	0	Q8N6Y2	0	#DIV/0!	0.784806	#DIV/0!	-0.349592
XM_003512464.1	2	0.272989	0.333333	0.0714144	0	0	Q8NGF8	3e-129	#DIV/0!	0.261602	#DIV/0!	-1.93455
XM_003495312.1	11	0.321282	3	0.137533	0	0	Q711Q0	0	#DIV/0!	0.428076	#DIV/0!	-1.22406
XM_003505229.1	0	0	1	0.214243	0	0	Q8NH72	1e-128	#DIV/0!	#DIV/0!	#DIV/0!	#DIV/0!
XM_003507874.1	2	0.082688	4	0.259576	0	0	P35443	0	#DIV/0!	3.13922	#DIV/0!	1.65041
XM_003514401.1	1.41667	0.115335	0.333333	0.0425956	0	0	P78386	0	#DIV/0!	0.36932	#DIV/0!	-1.43705
XM_003497549.1	0	0	1	0.0818609	0	0	C9JH25	6e-99	#DIV/0!	#DIV/0!	#DIV/0!	#DIV/0!
XM_003511380.1	1	0.0950754	1	0.149231	0	0	P04198	7e-135	#DIV/0!	1.56961	#DIV/0!	0.650408
XM_003497220.1	1	0.0698612	1	0.109655	0	0	Q8IWD5	2e-177	#DIV/0!	1.56961	#DIV/0!	0.650408
XM_003515866.1	1	0.0553652	2.5	0.217255	0	0	O75022	2e-31	#DIV/0!	3.92403	#DIV/0!	1.97234
XM_003514101.1	0	0	1	0.0851167	0	0	Q8WY21	0	#DIV/0!	#DIV/0!	#DIV/0!	#DIV/0!
XM_003508548.1	23	2.74393	7	1.3108	0	0	Q9BW30	1e-95	#DIV/0!	0.477708	#DIV/0!	-1.0658
XM_003507733.1	4	0.447111	1	0.175448	0	0	P51686	2e-174	#DIV/0!	0.392403	#DIV/0!	-1.34959
XM_003509232.1	0	0	1	0.179325	0	0	Q9NR23	5e-150	#DIV/0!	#DIV/0!	#DIV/0!	#DIV/0!
XM_003500218.1	0.666667	0.0629495	0.333333	0.0494031	0	0	Q3ZCT8	9e-176	#DIV/0!	0.784806	#DIV/0!	-0.349592
XM_003515290.1	14	0.522571	11	0.64447	0	0	Q8NDM7	0	#DIV/0!	1.23327	#DIV/0!	0.302485
XM_003512232.1	2	0.0680787	2	0.106857	0	0	Q9UGM3	6e-26	#DIV/0!	1.56961	#DIV/0!	0.650408
XM_003500283.1	3	0.120226	2	0.125806	0	0	Q13733	0	#DIV/0!	1.04641	#DIV/0!	0.0654453
XM_003498123.1	0	0	1	0.168612	0	0	Q86XQ3	1e-129	#DIV/0!	#DIV/0!	#DIV/0!	#DIV/0!
XM_003505808.1	9	0.475377	7	0.580345	0	0	P23109	0	#DIV/0!	1.22081	#DIV/0!	0.287838
XM_003510696.1	1	0.0754704	1	0.118459	0	0	P09923	0	#DIV/0!	1.56961	#DIV/0!	0.650408
XM_003504550.1	0	0	1	0.370947	0	0	Q06141	4e-59	#DIV/0!	#DIV/0!	#DIV/0!	#DIV/0!
XM_003515359.1	1	0.206789	1	0.324578	0	0		NA	#DIV/0!	1.56961	#DIV/0!	0.650408
XM_003506528.1	1	0.0281473	1	0.0441804	0	0	Q49AJ0	0	#DIV/0!	1.56961	#DIV/0!	0.650408
XM_003497958.1	0	0	1	0.128039	0	0	Q6IS24	0	#DIV/0!	#DIV/0!	#DIV/0!	#DIV/0!
XM_003512185.1	0	0	1	0.124519	0	0	Q9NQE7	0	#DIV/0!	#DIV/0!	#DIV/0!	#DIV/0!
XM_003509584.1	4	0.299152	3	0.352165	0	0	Q9H2Y9	0	#DIV/0!	1.17721	#DIV/0!	0.23537
XM_003500658.1	0.5	0.012852	0.5	0.0201727	0	0	Q9C0A0	0	#DIV/0!	1.56961	#DIV/0!	0.650408
XM_003515705.1	7.5	0.406531	2.5	0.212699	0	0	P41180	2e-72	#DIV/0!	0.523204	#DIV/0!	-0.934555
XM_003513955.1	1	0.0602006	2	0.188983	0	0	Q96PV4	2e-120	#DIV/0!	3.13922	#DIV/0!	1.65041
XM_003516210.1	0.25	0.0878707	0.5	0.275846	0	0	A8MTN3	1e-24	#DIV/0!	3.13922	#DIV/0!	1.65041
XM_003513326.1	2	0.27788	1	0.218082	0	0	P0C7W6	2e-48	#DIV/0!	0.784806	#DIV/0!	-0.349592
XM_003506159.1	1	0.0680227	1	0.106769	0	0	O75387	0	#DIV/0!	1.56961	#DIV/0!	0.650408
XM_003500494.1	4	0.272539	1	0.106945	0	0	P84550	5e-133	#DIV/0!	0.392403	#DIV/0!	-1.34959
XM_003509297.1	0	0	1	0.176882	0	0	Q92563	0	#DIV/0!	#DIV/0!	#DIV/0!	#DIV/0!
XM_003503305.1	1	0.048542	1.5	0.114288	0	0	Q9NS62	0	#DIV/0!	2.35442	#DIV/0!	1.23537
XM_003504620.1	0	0	1	0.618245	0	0	P01350	2e-29	#DIV/0!	#DIV/0!	#DIV/0!	#DIV/0!
XM_003495878.1	2	0.0577623	2	0.0906644	0	0	Q8NF91	0	#DIV/0!	1.56961	#DIV/0!	0.650408
XM_003495571.1	0	0	1	0.370947	0	0	Q8IUC0	2e-41	#DIV/0!	#DIV/0!	#DIV/0!	#DIV/0!
XM_003499063.1	3	0.976956	1	0.511147	0	0	P51460	1e-21	#DIV/0!	0.523204	#DIV/0!	-0.934555
XM_003502077.1	0	0	1	0.246828	0	0	P10144	2e-84	#DIV/0!	#DIV/0!	#DIV/0!	#DIV/0!
XM_003511905.1	1	0.0475924	1	0.0747016	0	0	Q68CR7	0	#DIV/0!	1.56961	#DIV/0!	0.650408
XM_003495479.1	1	0.0509333	1	0.0799454	0	0	Q9P2F5	0	#DIV/0!	1.56961	#DIV/0!	0.650408
XM_003511293.1	1	0.459531	1	0.721286	0	0	P05109	5e-31	#DIV/0!	1.56961	#DIV/0!	0.650408
XM_003513687.1	0	0	1	0.366755	0	0	P31025	6e-36	#DIV/0!	#DIV/0!	#DIV/0!	#DIV/0!
XM_003500650.1	2	0.196474	1	0.154194	0	0	Q8NAU1	3e-99	#DIV/0!	0.784806	#DIV/0!	-0.349592
XM_003514334.1	10	2.04068	2	0.640615	0	0	P08319	2e-86	#DIV/0!	0.313922	#DIV/0!	-1.67152
XM_003512469.1	0	0	1	0.192248	0	0	Q8NGF9	1e-144	#DIV/0!	#DIV/0!	#DIV/0!	#DIV/0!
XM_003514430.1	0.2	0.0595076	2	0.934039	0	0	P06317	1e-25	#DIV/0!	15.6961	#DIV/0!	3.97234
XM_003513219.1	1	0.114883	1	0.180321	0	0	Q96M02	3e-87	#DIV/0!	1.56961	#DIV/0!	0.650408
XM_003498016.1	1	0.0758859	1	0.119111	0	0	Q7L5N7	0	#DIV/0!	1.56961	#DIV/0!	0.650408
XM_003507327.1	1	0.023633	1	0.0370947	0	0	Q9BY89	0	#DIV/0!	1.56961	#DIV/0!	0.650408
XM_003515214.1	1	0.0956618	1	0.150152	0	0	Q9H3R1	0	#DIV/0!	1.56961	#DIV/0!	0.650408
XM_003500058.1	6	0.653018	1	0.170831	0	0	P12644	0	#DIV/0!	0.261602	#DIV/0!	-1.93455
XM_003508644.1	0	0	0.5	0.14051	0	0	Q9UK85	2e-62	#DIV/0!	#DIV/0!	#DIV/0!	#DIV/0!
XM_003506154.1	10	1.65652	2	0.520019	0	0	Q96NS1	1e-74	#DIV/0!	0.313922	#DIV/0!	-1.67152
XM_003512158.1	0	0	1	0.306206	0	0		NA	#DIV/0!	#DIV/0!	#DIV/0!	#DIV/0!
XM_003514522.1	0	0	0.5	0.0526913	0	0	Q96N87	0	#DIV/0!	#DIV/0!	#DIV/0!	#DIV/0!
XM_003497646.1	16	0.293058	1	0.0287492	0	0	A6NMZ7	0	#DIV/0!	0.0981007	#DIV/0!	-3.34959
XM_003500212.1	3.5	0.122602	0.5	0.0274911	0	0	P42262	0	#DIV/0!	0.22423	#DIV/0!	-2.15695
XM_003503455.1	0	0	0.2	0.0299151	0	0	P49796	0	#DIV/0!	#DIV/0!	#DIV/0!	#DIV/0!
XM_003513956.1	15	0.96032	6	0.602932	0	0	O15231	0	#DIV/0!	0.627845	#DIV/0!	-0.67152
XM_003514999.1	2.5	0.172901	0.5	0.0542773	0	0	Q01546	2e-137	#DIV/0!	0.313922	#DIV/0!	-1.67152
XM_003506739.1	2	0.0610898	1	0.0479436	0	0	Q8IZF2	0	#DIV/0!	0.784806	#DIV/0!	-0.349592
XM_003501955.1	0	0	0.5	0.0832253	0	0	Q9UIV8	2e-158	#DIV/0!	#DIV/0!	#DIV/0!	#DIV/0!
XM_003498763.1	0	0	1	0.377417	0	0	Q8N912	6e-35	#DIV/0!	#DIV/0!	#DIV/0!	#DIV/0!
XM_003515829.1	0.333333	0.0623798	0.333333	0.0979121	0	0	Q2M2I5	3e-36	#DIV/0!	1.56961	#DIV/0!	0.650408
XM_003502849.1	3	0.401532	2	0.420166	0	0		NA	#DIV/0!	1.04641	#DIV/0!	0.0654453
XM_003513086.1	1	0.133844	0.5	0.105042	0	0	Q8NGR1	6e-149	#DIV/0!	0.784806	#DIV/0!	-0.349592
XM_003499276.1	0.5	0.0551437	1	0.173109	0	0	Q08AI8	1e-48	#DIV/0!	3.13922	#DIV/0!	1.65041
XM_003504564.1	0	0	1	0.0706373	0	0	Q96JP9	0	#DIV/0!	#DIV/0!	#DIV/0!	#DIV/0!
XM_003504033.1	1	0.101867	1	0.159891	0	0	O43791	3e-118	#DIV/0!	1.56961	#DIV/0!	0.650408
XM_003495106.1	1	0.0973125	1	0.152743	0	0	Q02556	0	#DIV/0!	1.56961	#DIV/0!	0.650408
XM_003508219.1	1	0.104969	1	0.164761	0	0	Q9UGM5	6e-125	#DIV/0!	1.56961	#DIV/0!	0.650408
XM_003510556.1	4	0.582504	2	0.457153	0	0		NA	#DIV/0!	0.784806	#DIV/0!	-0.349592
XM_003504815.1	0	0	1	0.133297	0	0	P57087	1e-121	#DIV/0!	#DIV/0!	#DIV/0!	#DIV/0!
XM_003508205.1	7	0.35522	1	0.0796512	0	0	Q9Y5H1	0	#DIV/0!	0.22423	#DIV/0!	-2.15695
XM_003504721.1	0.5	0.0597656	0.5	0.0938088	0	0	Q8NGX3	5e-72	#DIV/0!	1.56961	#DIV/0!	0.650408
XM_003513306.1	3	0.127255	3	0.199741	0	0	Q7RTW8	0	#DIV/0!	1.56961	#DIV/0!	0.650408
XM_003500417.1	1	0.127255	1	0.199741	0	0	Q92765	2e-177	#DIV/0!	1.56961	#DIV/0!	0.650408
XM_003500734.1	0.5	0.037598	0.5	0.0590143	0	0	P57082	0	#DIV/0!	1.56961	#DIV/0!	0.650408
XM_003508534.1	0	0	0.333333	0.0414532	0	0	Q6UWW8	0	#DIV/0!	#DIV/0!	#DIV/0!	#DIV/0!
XM_003504723.1	2	0.202239	1	0.158718	0	0	Q9H6B9	5e-152	#DIV/0!	0.784806	#DIV/0!	-0.349592
XM_003510603.1	2	0.513762	1	0.403203	0	0	Q5W5W9	2e-33	#DIV/0!	0.784806	#DIV/0!	-0.349592
XM_003495413.1	2	0.064071	1	0.0502833	0	0	O60229	1e-59	#DIV/0!	0.784806	#DIV/0!	-0.349592
XM_003515264.1	0	0	1	0.253577	0	0	A6NJW4	1e-107	#DIV/0!	#DIV/0!	#DIV/0!	#DIV/0!
XM_003499626.1	1	0.0625685	2.5	0.245521	0	0	Q06187	0	#DIV/0!	3.92403	#DIV/0!	1.97234
XM_003513739.1	0.211111	0.0243206	0.5	0.0904118	0	0	Q6IFN5	4e-110	#DIV/0!	3.7175	#DIV/0!	1.89433
XM_003501690.1	0.2	0.00922136	0.2	0.014474	0	0	O00712	0	#DIV/0!	1.56961	#DIV/0!	0.650408
XM_003511356.1	0	0	1	0.275067	0	0	Q6UX82	2e-40	#DIV/0!	#DIV/0!	#DIV/0!	#DIV/0!
XM_003503764.1	4	0.368444	1	0.144578	0	0	Q9UNE0	0	#DIV/0!	0.392403	#DIV/0!	-1.34959
XM_003512739.1	0	0	1	0.171432	0	0	Q9UK17	0	#DIV/0!	#DIV/0!	#DIV/0!	#DIV/0!
XM_003515016.1	2	0.0969702	2	0.152206	0	0	O75110	0	#DIV/0!	1.56961	#DIV/0!	0.650408
XM_003501780.1	2	0.0841176	3.5	0.231056	0	0	P15498	0	#DIV/0!	2.74682	#DIV/0!	1.45776
XM_003499256.1	0	0	1.33333	0.0509742	0	0	Q12756	0	#DIV/0!	#DIV/0!	#DIV/0!	#DIV/0!
XM_003495705.1	1	0.0711838	1	0.111731	0	0	Q7RTS5	0	#DIV/0!	1.56961	#DIV/0!	0.650408
XM_003501049.1	1	0.040827	2	0.128165	0	0	O76041	0	#DIV/0!	3.13922	#DIV/0!	1.65041
XM_003515732.1	0	0	1	0.318214	0	0	Q13103	2e-67	#DIV/0!	#DIV/0!	#DIV/0!	#DIV/0!
XM_003506508.1	1	0.0771601	1	0.121111	0	0	Q8TAL6	1e-110	#DIV/0!	1.56961	#DIV/0!	0.650408
XM_003505652.1	1	0.110287	3	0.519326	0	0	P35247	6e-104	#DIV/0!	4.70884	#DIV/0!	2.23537
XM_003508181.1	2	0.103524	3	0.243739	0	0	Q8TF61	0	#DIV/0!	2.35442	#DIV/0!	1.23537
XM_003509554.1	2	0.0991794	1	0.0778366	0	0	A6PVC2	0	#DIV/0!	0.784806	#DIV/0!	-0.349592
XM_003509925.1	2	0.349503	2	0.548583	0	0	P09211	9e-82	#DIV/0!	1.56961	#DIV/0!	0.650408
XM_003515206.1	0	0	1	0.0763415	0	0	P82987	7e-29	#DIV/0!	#DIV/0!	#DIV/0!	#DIV/0!
XM_003501511.1	3	0.667061	1	0.349009	0	0	O00746	1e-84	#DIV/0!	0.523204	#DIV/0!	-0.934555
XM_003509282.1	3	0.954411	2	0.998703	0	0	Q9C0B2	1e-24	#DIV/0!	1.04641	#DIV/0!	0.0654453
XM_003514369.1	0	0	1	0.156423	0	0	Q96QZ0	0	#DIV/0!	#DIV/0!	#DIV/0!	#DIV/0!
XM_003496745.1	0	0	1	0.0772806	0	0	Q96KR7	0	#DIV/0!	#DIV/0!	#DIV/0!	#DIV/0!
XM_003508479.1	0	0	1	0.272755	0	0	O95866	5e-70	#DIV/0!	#DIV/0!	#DIV/0!	#DIV/0!
XM_003496152.1	0	0	1	0.139006	0	0	O00451	0	#DIV/0!	#DIV/0!	#DIV/0!	#DIV/0!
XM_003500952.1	2	0.175617	2	0.275651	0	0	P21754	1e-149	#DIV/0!	1.56961	#DIV/0!	0.650408
XM_003505875.1	0	0	2	0.444628	0	0	P04440	1e-91	#DIV/0!	#DIV/0!	#DIV/0!	#DIV/0!
XM_003513046.1	1	0.132134	2	0.414797	0	0	Q8NGK0	8e-162	#DIV/0!	3.13922	#DIV/0!	1.65041
XM_003515458.1	1	0.285883	4	1.7949	0	0	A1L190	4e-32	#DIV/0!	6.27845	#DIV/0!	2.65041
XM_003510320.1	4	0.0598954	3	0.0705094	0	0	P98088	8e-21	#DIV/0!	1.17721	#DIV/0!	0.23537
XM_003498724.1	1	0.035049	1	0.0550133	0	0	Q6UXK5	0	#DIV/0!	1.56961	#DIV/0!	0.650408
XM_003502117.1	3	0.246177	3	0.386403	0	0	Q5I0G3	0	#DIV/0!	1.56961	#DIV/0!	0.650408
XM_003516049.1	0	0	0.5	0.226978	0	0	Q7L4S7	7e-46	#DIV/0!	#DIV/0!	#DIV/0!	#DIV/0!
XM_003515793.1	0	0	1	0.249676	0	0	Q96L15	2e-29	#DIV/0!	#DIV/0!	#DIV/0!	#DIV/0!
XM_003515748.1	0.392857	0.0491362	0.142857	0.0280454	0	0	P59901	2e-32	#DIV/0!	0.570768	#DIV/0!	-0.809024
XM_003512618.1	0	0	1	0.313602	0	0	P02100	6e-62	#DIV/0!	#DIV/0!	#DIV/0!	#DIV/0!
XM_003497286.1	1	0.0598521	0.5	0.0469723	0	0	Q8N3Y3	0	#DIV/0!	0.784806	#DIV/0!	-0.349592
XM_003516136.1	0	0	0.333333	0.0704839	0	0	Q8NG99	9e-115	#DIV/0!	#DIV/0!	#DIV/0!	#DIV/0!
XM_003503898.1	1	0.177501	1	0.278608	0	0	P06314	2e-38	#DIV/0!	1.56961	#DIV/0!	0.650408
XM_003505475.1	3	0.284572	2	0.297778	0	0	P48546	4e-45	#DIV/0!	1.04641	#DIV/0!	0.0654453
XM_003504423.1	0	0	1	0.821718	0	0		NA	#DIV/0!	#DIV/0!	#DIV/0!	#DIV/0!
XM_003498952.1	9	0.979527	1	0.170831	0	0	Q86VZ4	5e-129	#DIV/0!	0.174401	#DIV/0!	-2.51952
XM_003498745.1	7	0.544182	3	0.366066	0	0	Q96BZ4	0	#DIV/0!	0.672691	#DIV/0!	-0.571985
XM_003507591.1	4	0.257681	1	0.101115	0	0	Q6P9A2	0	#DIV/0!	0.392403	#DIV/0!	-1.34959
XM_003503297.1	0	0	1	0.203073	0	0	Q6NSX1	3e-67	#DIV/0!	#DIV/0!	#DIV/0!	#DIV/0!
XM_003499384.1	3	0.339927	1	0.177851	0	0		NA	#DIV/0!	0.523204	#DIV/0!	-0.934555
XM_003505883.1	0	0	1	0.142672	0	0	P13762	7e-30	#DIV/0!	#DIV/0!	#DIV/0!	#DIV/0!
XM_003512973.1	11	0.545487	4	0.311346	0	0	Q8N6Q3	9e-88	#DIV/0!	0.570768	#DIV/0!	-0.809024
XM_003504054.1	0	0	2	0.295743	0	0	Q9HC77	1e-67	#DIV/0!	#DIV/0!	#DIV/0!	#DIV/0!
XM_003507776.1	0	0	1	0.0890069	0	0	Q4VNC0	0	#DIV/0!	#DIV/0!	#DIV/0!	#DIV/0!
XM_003515057.1	7	0.856523	3	0.576175	0	0	Q63ZE4	5e-63	#DIV/0!	0.672691	#DIV/0!	-0.571985
XM_003495054.1	1	0.224771	2	0.705605	0	0	Q9HD36	3e-45	#DIV/0!	3.13922	#DIV/0!	1.65041
XM_003513773.1	1.33333	0.173955	1	0.204781	0	0	A6NND4	2e-130	#DIV/0!	1.17721	#DIV/0!	0.23537
XM_003501009.1	1.5	0.21466	1	0.224622	0	0	P30039	7e-138	#DIV/0!	1.04641	#DIV/0!	0.0654453
XM_003509589.1	4	0.213368	1	0.0837262	0	0	P14867	0	#DIV/0!	0.392403	#DIV/0!	-1.34959
XM_003503830.1	13	2.02125	10	2.44044	0	0	Q9Y257	2e-81	#DIV/0!	1.20739	#DIV/0!	0.271896
XM_003512123.1	1.6547	0.0861899	0.316667	0.02589	0	0	Q96TA0	0	#DIV/0!	0.300383	#DIV/0!	-1.73513
XM_003512670.1	0	0	0.5	0.104703	0	0	Q8NGR1	5e-97	#DIV/0!	#DIV/0!	#DIV/0!	#DIV/0!
XM_003510746.1	15	1.65431	5	0.865543	0	0	O43323	1e-170	#DIV/0!	0.523204	#DIV/0!	-0.934555
XM_003515263.1	1	0.136795	1	0.214716	0	0	Q00889	7e-22	#DIV/0!	1.56961	#DIV/0!	0.650408
XM_003495082.1	0	0	0.5	0.0666486	0	0	Q9UBL6	1e-50	#DIV/0!	#DIV/0!	#DIV/0!	#DIV/0!
XM_003498234.1	1	0.101616	1	0.159498	0	0	Q8NHS2	0	#DIV/0!	1.56961	#DIV/0!	0.650408
XM_003515379.1	0	0	1	0.171735	0	0	O00757	0	#DIV/0!	#DIV/0!	#DIV/0!	#DIV/0!
XM_003497818.1	2	0.147181	1	0.115508	0	0	O14975	0	#DIV/0!	0.784806	#DIV/0!	-0.349592
XM_003500287.1	6	0.529474	2	0.277023	0	0	Q92806	0	#DIV/0!	0.523204	#DIV/0!	-0.934555
XM_003499374.1	3	0.259026	1	0.135523	0	0	Q495N2	2e-173	#DIV/0!	0.523204	#DIV/0!	-0.934555
XM_003501781.1	2	0.0908297	3.5	0.249493	0	0	P15498	0	#DIV/0!	2.74682	#DIV/0!	1.45776
XM_003499961.1	10	2.85226	7	3.13386	0	0	O76096	4e-59	#DIV/0!	1.09873	#DIV/0!	0.135835
XM_003500708.1	1	0.0481465	1.5	0.113357	0	0	P51160	0	#DIV/0!	2.35442	#DIV/0!	1.23537
XM_003497066.1	4	0.505906	1	0.198519	0	0	O14649	9e-142	#DIV/0!	0.392403	#DIV/0!	-1.34959
XM_003495230.1	1.66667	0.299694	0.833333	0.235202	0	0	P78369	1e-90	#DIV/0!	0.784806	#DIV/0!	-0.349592
XM_003513558.1	2	0.0860724	1	0.0675502	0	0		NA	#DIV/0!	0.784806	#DIV/0!	-0.349592
XM_003501267.1	1.5	0.179817	0.5	0.0940807	0	0	Q9NZD1	2e-141	#DIV/0!	0.523204	#DIV/0!	-0.934555
XM_003499084.1	0.5	0.110582	1.5	0.520714	0	0	Q96Q77	2e-94	#DIV/0!	4.70884	#DIV/0!	2.23537
XM_003500220.1	0	0	3	0.559083	0	0	Q99685	1e-148	#DIV/0!	#DIV/0!	#DIV/0!	#DIV/0!
XM_003494987.1	6	1.74751	2	0.914306	0	0	A6PVY3	5e-36	#DIV/0!	0.523204	#DIV/0!	-0.934555
XM_003507156.1	3	0.149486	1	0.0782117	0	0	Q8IVU1	0	#DIV/0!	0.523204	#DIV/0!	-0.934555
XM_003499882.1	1	0.0480346	3	0.226187	0	0	Q9ULE6	0	#DIV/0!	4.70884	#DIV/0!	2.23537
XM_003508329.1	0	0	2	0.0993354	0	0	Q5TCY1	1e-170	#DIV/0!	#DIV/0!	#DIV/0!	#DIV/0!
XM_003499165.1	0	0	2	0.140917	0	0	Q9H165	0	#DIV/0!	#DIV/0!	#DIV/0!	#DIV/0!
XM_003512321.1	0	0	1	0.248719	0	0	O95678	3e-75	#DIV/0!	#DIV/0!	#DIV/0!	#DIV/0!
XM_003515988.1	1	0.115203	2	0.361647	0	0	Q92819	0	#DIV/0!	3.13922	#DIV/0!	1.65041
XM_003502017.1	1	0.353485	1	0.554835	0	0	P23528	1e-23	#DIV/0!	1.56961	#DIV/0!	0.650408
XM_003509151.1	1	0.12011	1	0.188526	0	0	O75841	7e-148	#DIV/0!	1.56961	#DIV/0!	0.650408
XM_003508526.1	0	0	1	0.0707914	0	0	Q7Z353	0	#DIV/0!	#DIV/0!	#DIV/0!	#DIV/0!
XM_003508177.1	0	0	1	0.257602	0	0	A8MTQ0	2e-58	#DIV/0!	#DIV/0!	#DIV/0!	#DIV/0!
XM_003506321.1	0	0	1	0.0976176	0	0	Q99884	0	#DIV/0!	#DIV/0!	#DIV/0!	#DIV/0!
XM_003502603.1	1	0.162187	3	0.763714	0	0	P24158	2e-88	#DIV/0!	4.70884	#DIV/0!	2.23537
XM_003514759.1	1	0.249143	1	0.391058	0	0	P01764	6e-42	#DIV/0!	1.56961	#DIV/0!	0.650408
XM_003500217.1	0.666667	0.0517944	0.333333	0.0406485	0	0	Q3ZCT8	0	#DIV/0!	0.784806	#DIV/0!	-0.349592
XM_003513466.1	0	0	2	0.395827	0	0	Q8NH48	8e-130	#DIV/0!	#DIV/0!	#DIV/0!	#DIV/0!
XM_003494912.1	4	0.725575	2	0.569436	0	0	Q9BXS1	2e-89	#DIV/0!	0.784806	#DIV/0!	-0.349592
XM_003512689.1	3	0.256881	2	0.268802	0	0	Q0WX57	5e-116	#DIV/0!	1.04641	#DIV/0!	0.0654453
XM_003498571.1	1	0.0861621	3	0.405723	0	0	Q96NX5	0	#DIV/0!	4.70884	#DIV/0!	2.23537
XM_003504487.1	0.5	0.0368608	1.5	0.173571	0	0	Q14168	0	#DIV/0!	4.70884	#DIV/0!	2.23537
XM_003505932.1	1	0.11683	1	0.183378	0	0	P51685	3e-135	#DIV/0!	1.56961	#DIV/0!	0.650408
XM_003509597.1	8	0.169876	3	0.0999899	0	0	P12107	3e-21	#DIV/0!	0.588604	#DIV/0!	-0.76463
XM_003504562.1	0	0	1	0.222314	0	0	P47804	9e-138	#DIV/0!	#DIV/0!	#DIV/0!	#DIV/0!
XM_003497186.1	10	0.623798	8	0.783296	0	0	Q13470	0	#DIV/0!	1.25569	#DIV/0!	0.32848
XM_003511175.1	6	0.439198	3	0.344685	0	0	Q15835	0	#DIV/0!	0.784806	#DIV/0!	-0.349592
XM_003514468.1	1	0.080099	1	0.125724	0	0	Q13237	0	#DIV/0!	1.56961	#DIV/0!	0.650408
XM_003500474.1	0	0	0.333333	0.0523936	0	0	Q8NA61	1e-153	#DIV/0!	#DIV/0!	#DIV/0!	#DIV/0!
XM_003509256.1	1	0.151494	2	0.475573	0	0	Q8NC01	1e-93	#DIV/0!	3.13922	#DIV/0!	1.65041
XM_003506112.1	2	0.270312	1	0.212143	0	0	A5LHX3	5e-126	#DIV/0!	0.784806	#DIV/0!	-0.349592
XM_003514833.1	1.16667	0.156658	1	0.210765	0	0	A6NJ16	1e-33	#DIV/0!	1.34538	#DIV/0!	0.428015
XM_003502278.1	0	0	1	0.193778	0	0	Q96LB0	1e-70	#DIV/0!	#DIV/0!	#DIV/0!	#DIV/0!
XM_003508527.1	0	0	1	0.0747877	0	0	Q7Z353	0	#DIV/0!	#DIV/0!	#DIV/0!	#DIV/0!
XM_003514051.1	1.5	0.452823	1	0.473837	0	0		NA	#DIV/0!	1.04641	#DIV/0!	0.0654453
XM_003510273.1	6	0.595076	2	0.311346	0	0	O75600	0	#DIV/0!	0.523204	#DIV/0!	-0.934555
XM_003510401.1	0.333333	0.0381882	1	0.179822	0	0	Q8NHA4	2e-127	#DIV/0!	4.70884	#DIV/0!	2.23537
XM_003515079.1	0.25	0.0167576	0.833333	0.0876765	0	0	Q9UJQ4	3e-110	#DIV/0!	5.23204	#DIV/0!	2.38737
XM_003504911.1	1.25	0.0802752	0.5	0.0504004	0	0	Q5TF39	6e-176	#DIV/0!	0.627845	#DIV/0!	-0.67152
XM_003508175.1	4	0.584563	3	0.688152	0	0	Q04741	5e-86	#DIV/0!	1.17721	#DIV/0!	0.23537
XM_003511326.1	0	0	1	0.142359	0	0	Q92764	0	#DIV/0!	#DIV/0!	#DIV/0!	#DIV/0!
XM_003501212.1	1	0.11362	0.5	0.0891699	0	0	P14091	3e-172	#DIV/0!	0.784806	#DIV/0!	-0.349592
XM_003502967.1	5	0.263425	1	0.0826952	0	0	Q8NA82	0	#DIV/0!	0.313922	#DIV/0!	-1.67152
XM_003498587.1	8	0.288963	2	0.11339	0	0	Q9UBL0	0	#DIV/0!	0.392403	#DIV/0!	-1.34959
XM_003500473.1	0	0	0.333333	0.0512762	0	0	Q8NA61	2e-164	#DIV/0!	#DIV/0!	#DIV/0!	#DIV/0!
XM_003495512.1	0.4	0.0182595	0.2	0.0143302	0	0	P39086	0	#DIV/0!	0.784806	#DIV/0!	-0.349592
XM_003515577.1	1	0.130329	1	0.204566	0	0	Q8NG99	1e-87	#DIV/0!	1.56961	#DIV/0!	0.650408
XM_003511626.1	0	0	1	0.100905	0	0	Q9NQW8	0	#DIV/0!	#DIV/0!	#DIV/0!	#DIV/0!
XM_003511542.1	4	0.463393	3	0.54551	0	0	Q9BSE5	6e-166	#DIV/0!	1.17721	#DIV/0!	0.23537
XM_003511537.1	4	0.762356	2	0.598301	0	0	P33260	5e-84	#DIV/0!	0.784806	#DIV/0!	-0.349592
XM_003499845.1	3	0.168807	2	0.176641	0	0	P49802	0	#DIV/0!	1.04641	#DIV/0!	0.0654453
XM_003508000.1	2	0.149127	1	0.117036	0	0	P41279	0	#DIV/0!	0.784806	#DIV/0!	-0.349592
XM_003497727.1	1	0.23366	2	0.733511	0	0	Q9NYY1	6e-67	#DIV/0!	3.13922	#DIV/0!	1.65041
XM_003502336.1	1	0.435345	1	0.683323	0	0		NA	#DIV/0!	1.56961	#DIV/0!	0.650408
XM_003508630.1	6	0.280709	4	0.293736	0	0	Q12884	0	#DIV/0!	1.04641	#DIV/0!	0.0654453
XM_003500255.1	0	0	1	0.211452	0	0	Q96DU3	4e-58	#DIV/0!	#DIV/0!	#DIV/0!	#DIV/0!
XM_003496934.1	4	0.504363	1	0.197914	0	0	Q9H1Z9	4e-94	#DIV/0!	0.392403	#DIV/0!	-1.34959
XM_003511204.1	0	0	1	0.20223	0	0	Q6IEY1	1e-124	#DIV/0!	#DIV/0!	#DIV/0!	#DIV/0!
XM_003503159.1	0.5	0.0133498	0.25	0.010477	0	0	O60706	0	#DIV/0!	0.784806	#DIV/0!	-0.349592
XM_003504881.1	0	0	1	0.078306	0	0	Q96K78	0	#DIV/0!	#DIV/0!	#DIV/0!	#DIV/0!
XM_003515151.1	0	0	1	0.253577	0	0	P23083	5e-22	#DIV/0!	#DIV/0!	#DIV/0!	#DIV/0!
XM_003510708.1	5	0.301735	4	0.378885	0	0	Q7LDG7	0	#DIV/0!	1.25569	#DIV/0!	0.32848
XM_003513660.1	1	0.055489	1	0.0870962	0	0	P35398	0	#DIV/0!	1.56961	#DIV/0!	0.650408
XM_003506003.1	1	0.130466	1	0.204781	0	0	Q8NH18	3e-128	#DIV/0!	1.56961	#DIV/0!	0.650408
XM_003496368.1	1	0.0414822	3	0.195333	0	0	Q5XX13	0	#DIV/0!	4.70884	#DIV/0!	2.23537
XM_003511921.1	0	0	1	0.0747877	0	0	P41180	4e-110	#DIV/0!	#DIV/0!	#DIV/0!	#DIV/0!
XM_003513419.1	0	0	1	0.0890069	0	0	Q9UBX5	0	#DIV/0!	#DIV/0!	#DIV/0!	#DIV/0!
XM_003499862.1	4	0.0363106	3	0.0427452	0	0	Q8TDW7	0	#DIV/0!	1.17721	#DIV/0!	0.23537
XM_003509108.1	1	0.126476	0.333333	0.066173	0	0	Q8NG99	5e-111	#DIV/0!	0.523204	#DIV/0!	-0.934555
XM_003512096.1	4	0.237689	2	0.186539	0	0	O95436	0	#DIV/0!	0.784806	#DIV/0!	-0.349592
XM_003512706.1	2	0.141636	2	0.222314	0	0	Q6UXY8	0	#DIV/0!	1.56961	#DIV/0!	0.650408
XM_003499267.1	0.25	0.0330334	0.25	0.0518496	0	0	Q6IFH4	8e-140	#DIV/0!	1.56961	#DIV/0!	0.650408
XM_003499246.1	0.25	0.0305901	1.25	0.240073	0	0	Q6IFH4	2e-143	#DIV/0!	7.84806	#DIV/0!	2.97234
XM_003510247.1	1	0.107145	2	0.336351	0	0	A6NMD0	2e-94	#DIV/0!	3.13922	#DIV/0!	1.65041
XM_003504062.1	1	0.0837202	1	0.131408	0	0	Q7KZI7	6e-77	#DIV/0!	1.56961	#DIV/0!	0.650408
XM_003510528.1	0	0	1	0.248719	0	0	Q3KPI0	7e-36	#DIV/0!	#DIV/0!	#DIV/0!	#DIV/0!
XM_003495210.1	4	0.293318	1	0.115099	0	0	Q0VAK6	0	#DIV/0!	0.392403	#DIV/0!	-1.34959
XM_003501211.1	1	0.104176	0.5	0.0817578	0	0	P14091	0	#DIV/0!	0.784806	#DIV/0!	-0.349592
XM_003513638.1	0	0	1	0.207398	0	0	Q9UGF5	1e-103	#DIV/0!	#DIV/0!	#DIV/0!	#DIV/0!
XM_003499050.1	4	0.16761	2	0.131541	0	0	Q9BZ11	0	#DIV/0!	0.784806	#DIV/0!	-0.349592
XM_003506655.1	1	0.0141249	1	0.0221707	0	0	O15050	0	#DIV/0!	1.56961	#DIV/0!	0.650408
XM_003515558.1	4	0.368444	1	0.144578	0	0	Q6PI73	2e-82	#DIV/0!	0.392403	#DIV/0!	-1.34959
XM_003497133.1	2	0.334881	1	0.262817	0	0	P01579	4e-37	#DIV/0!	0.784806	#DIV/0!	-0.349592
XM_003505758.1	2	0.219988	1	0.172648	0	0	Q9NVF9	0	#DIV/0!	0.784806	#DIV/0!	-0.349592
XM_003499625.1	1	0.0626633	2.5	0.245893	0	0	Q06187	0	#DIV/0!	3.92403	#DIV/0!	1.97234
XM_003505233.1	3	1.61134	5	4.2153	0	0	Q15370	1e-24	#DIV/0!	2.61602	#DIV/0!	1.38737
XM_003498877.1	2	0.173408	5	0.680458	0	0	Q49AQ9	8e-61	#DIV/0!	3.92403	#DIV/0!	1.97234
XM_003504438.1	1	0.0732429	2	0.229926	0	0	P57727	0	#DIV/0!	3.13922	#DIV/0!	1.65041
XM_003502951.1	3	0.577086	1	0.301933	0	0	A6NNP5	7e-88	#DIV/0!	0.523204	#DIV/0!	-0.934555
XM_003514018.1	0	0	2	0.287874	0	0	Q9NYZ4	7e-114	#DIV/0!	#DIV/0!	#DIV/0!	#DIV/0!
XM_003498540.1	5	0.293318	1	0.092079	0	0	Q9H892	0	#DIV/0!	0.313922	#DIV/0!	-1.67152
XM_003501626.1	2.33333	0.264388	0.666667	0.118567	0	0	Q8TEY5	2e-125	#DIV/0!	0.448461	#DIV/0!	-1.15695
XM_003513602.1	6	1.11778	2	0.584826	0	0	Q53FE4	1e-70	#DIV/0!	0.523204	#DIV/0!	-0.934555
XM_003503719.1	1	0.0447111	3	0.210537	0	0	O00423	0	#DIV/0!	4.70884	#DIV/0!	2.23537
XM_003506072.1	3	0.459531	2	0.480857	0	0	Q5VWX1	9e-105	#DIV/0!	1.04641	#DIV/0!	0.0654453
XM_003499910.1	4	0.186296	1	0.0731033	0	0	Q6ZVD7	0	#DIV/0!	0.392403	#DIV/0!	-1.34959
XM_003497124.1	0.5	0.0544182	0.5	0.0854154	0	0	Q9Y5W5	0	#DIV/0!	1.56961	#DIV/0!	0.650408
XM_003504192.1	2	0.304101	0.5	0.11933	0	0	Q5VXH4	2e-27	#DIV/0!	0.392403	#DIV/0!	-1.34959
XM_003496187.1	6	0.216848	2	0.113456	0	0	P07197	2e-35	#DIV/0!	0.523204	#DIV/0!	-0.934555
XM_003496897.1	2	0.268557	1	0.210765	0	0	A6NDP7	2e-160	#DIV/0!	0.784806	#DIV/0!	-0.349592
XM_003510653.1	0	0	1	0.206738	0	0	Q9GZK7	2e-85	#DIV/0!	#DIV/0!	#DIV/0!	#DIV/0!
XM_003497482.1	11	2.61457	5	1.86539	0	0	Q5TGL8	1e-73	#DIV/0!	0.71346	#DIV/0!	-0.487096
XM_003515726.1	3	0.892614	1	0.467019	0	0	Q6ZQR2	1e-25	#DIV/0!	0.523204	#DIV/0!	-0.934555
XM_003500111.1	0.5	0.00892871	0.5	0.0140146	0	0	Q15878	0	#DIV/0!	1.56961	#DIV/0!	0.650408
XM_003502595.1	0	0	1	0.126788	0	0	Q8TF44	0	#DIV/0!	#DIV/0!	#DIV/0!	#DIV/0!
XM_003509784.1	0	0	0.333333	0.0691328	0	0	Q8N349	7e-134	#DIV/0!	#DIV/0!	#DIV/0!	#DIV/0!
XM_003500112.1	0.5	0.00900257	0.5	0.0141305	0	0	Q15878	0	#DIV/0!	1.56961	#DIV/0!	0.650408
XM_003514627.1	2	0.107984	2	0.169493	0	0	Q9NTN9	0	#DIV/0!	1.56961	#DIV/0!	0.650408
XM_003500211.1	2.5	0.0847728	1.5	0.0798362	0	0	P42262	0	#DIV/0!	0.941767	#DIV/0!	-0.0865577
XM_003514643.1	1	0.199796	1	0.313602	0	0	P31025	7e-32	#DIV/0!	1.56961	#DIV/0!	0.650408
XM_003502652.1	0.5	0.0364065	2	0.228576	0	0	P40238	4e-55	#DIV/0!	6.27845	#DIV/0!	2.65041
XM_003501330.1	0	0	1	0.0938088	0	0	Q8ND71	3e-57	#DIV/0!	#DIV/0!	#DIV/0!	#DIV/0!
XM_003505207.1	0	0	0.5	0.0943542	0	0	Q8NH19	5e-95	#DIV/0!	#DIV/0!	#DIV/0!	#DIV/0!
XM_003505998.1	0	0	0.5	0.101431	0	0	Q96RB7	2e-135	#DIV/0!	#DIV/0!	#DIV/0!	#DIV/0!
XM_003495346.1	0	0	2	0.174037	0	0	P28329	0	#DIV/0!	#DIV/0!	#DIV/0!	#DIV/0!
XM_003514712.1	0	0	1	0.207398	0	0	Q8N349	8e-149	#DIV/0!	#DIV/0!	#DIV/0!	#DIV/0!
XM_003503426.1	21	2.33471	3	0.523514	0	0	Q6W5P4	3e-167	#DIV/0!	0.22423	#DIV/0!	-2.15695
XM_003502921.1	3	0.579782	1	0.303344	0	0	P57735	1e-111	#DIV/0!	0.523204	#DIV/0!	-0.934555
XM_003499123.1	4	0.310377	1	0.121793	0	0	Q92952	0	#DIV/0!	0.392403	#DIV/0!	-1.34959
XM_003501531.1	1.5	0.22156	3	0.695525	0	0	A6NIE9	7e-103	#DIV/0!	3.13922	#DIV/0!	1.65041
XM_003513913.1	0	0	1	0.0607825	0	0	Q86W28	0	#DIV/0!	#DIV/0!	#DIV/0!	#DIV/0!
XM_003513947.1	5	0.458512	0.5	0.0719686	0	0	Q6NXR0	1e-56	#DIV/0!	0.156961	#DIV/0!	-2.67152
XM_003513948.1	2.5	0.249745	3	0.470404	0	0	Q6NXR0	4e-56	#DIV/0!	1.88353	#DIV/0!	0.913442
XM_003511337.1	3	0.188561	2	0.197312	0	0	A8MUX0	2e-147	#DIV/0!	1.04641	#DIV/0!	0.0654453
XM_003503430.1	0	0	3	0.296419	0	0	Q3KP44	0	#DIV/0!	#DIV/0!	#DIV/0!	#DIV/0!
XM_003509104.1	1	0.121999	1	0.191492	0	0	Q8NG99	2e-94	#DIV/0!	1.56961	#DIV/0!	0.650408
XM_003515287.1	1	0.0757007	1	0.118821	0	0	Q96NI8	8e-87	#DIV/0!	1.56961	#DIV/0!	0.650408
XM_003499237.1	1	0.0226205	1	0.0355054	0	0	P23467	0	#DIV/0!	1.56961	#DIV/0!	0.650408
XM_003514512.1	1	0.0528872	0.5	0.0415062	0	0	P41180	8e-37	#DIV/0!	0.784806	#DIV/0!	-0.349592
XM_003500540.1	1	0.0245156	1	0.03848	0	0	Q8TCU6	0	#DIV/0!	1.56961	#DIV/0!	0.650408
XM_003501817.1	10	0.600258	5	0.471086	0	0	Q14055	3e-127	#DIV/0!	0.784806	#DIV/0!	-0.349592
XM_003495257.1	2	0.117884	1	0.0925164	0	0	Q9BQL6	0	#DIV/0!	0.784806	#DIV/0!	-0.349592
XM_003514865.1	3	0.387729	1	0.202862	0	0		NA	#DIV/0!	0.523204	#DIV/0!	-0.934555
XM_003507570.1	0.5	0.0339555	2	0.213188	0	0	Q4VX76	0	#DIV/0!	6.27845	#DIV/0!	2.65041
XM_003515762.1	2	0.0933585	1	0.0732683	0	0	Q9NZW4	9e-96	#DIV/0!	0.784806	#DIV/0!	-0.349592
XM_003509857.1	0	0	0.5	0.100489	0	0	O95847	0	#DIV/0!	#DIV/0!	#DIV/0!	#DIV/0!
XM_003508351.1	0	0	1	0.275067	0	0		NA	#DIV/0!	#DIV/0!	#DIV/0!	#DIV/0!
XM_003502788.1	1	0.106592	3	0.501925	0	0	Q0D2K0	2e-161	#DIV/0!	4.70884	#DIV/0!	2.23537
XM_003508114.1	1	0.320603	2	1.00644	0	0	Q9NRC9	1e-59	#DIV/0!	3.13922	#DIV/0!	1.65041
XM_003499255.1	0	0	1.33333	0.0484355	0	0	O60333	0	#DIV/0!	#DIV/0!	#DIV/0!	#DIV/0!
XM_003509260.1	0	0	1	0.225402	0	0	Q13241	6e-54	#DIV/0!	#DIV/0!	#DIV/0!	#DIV/0!
XM_003509219.1	1	0.198836	2	0.624189	0	0	P56851	2e-49	#DIV/0!	3.13922	#DIV/0!	1.65041
XM_003512594.1	5	0.144339	2	0.0906222	0	0	A7MBM2	0	#DIV/0!	0.627845	#DIV/0!	-0.67152
XM_003497486.1	4	0.489441	1	0.192058	0	0	B7ZBB8	1e-96	#DIV/0!	0.392403	#DIV/0!	-1.34959
XM_003499891.1	1	0.107423	1	0.168612	0	0	P21452	4e-176	#DIV/0!	1.56961	#DIV/0!	0.650408
XM_003498313.1	0	0	2	0.347143	0	0	A8MTI9	1e-54	#DIV/0!	#DIV/0!	#DIV/0!	#DIV/0!
XM_003515225.1	1.5	0.218439	0.5	0.114288	0	0	Q95IE3	6e-79	#DIV/0!	0.523204	#DIV/0!	-0.934555
XM_003501437.1	1	0.0917024	1	0.143937	0	0	Q92754	0	#DIV/0!	1.56961	#DIV/0!	0.650408
XM_003503200.1	1.5	0.232347	0.333333	0.0810433	0	0	Q99217	1e-46	#DIV/0!	0.348803	#DIV/0!	-1.51952
XM_003507066.1	9	0.753482	1	0.131408	0	0	Q8TAV3	0	#DIV/0!	0.174401	#DIV/0!	-2.51952
XM_003504629.1	5	0.195268	2	0.122598	0	0	Q9UQ05	0	#DIV/0!	0.627845	#DIV/0!	-0.67152
XM_003499513.1	0	0	2	0.201706	0	0	P23435	5e-96	#DIV/0!	#DIV/0!	#DIV/0!	#DIV/0!
XM_003496514.1	1	0.0605531	1	0.0950449	0	0	Q2M3M2	0	#DIV/0!	1.56961	#DIV/0!	0.650408
XM_003516094.1	0.5	0.259568	1	0.814841	0	0	P09681	1e-32	#DIV/0!	3.13922	#DIV/0!	1.65041
XM_003495513.1	0.4	0.0176932	0.2	0.0138857	0	0	P39086	0	#DIV/0!	0.784806	#DIV/0!	-0.349592
XM_003514974.1	0	0	1	0.361983	0	0	Q8N136	3e-57	#DIV/0!	#DIV/0!	#DIV/0!	#DIV/0!
XM_003506620.1	0	0	1	0.157946	0	0	A6NKL6	8e-88	#DIV/0!	#DIV/0!	#DIV/0!	#DIV/0!
XM_003508141.1	1	0.0368608	1	0.0578571	0	0	P48357	0	#DIV/0!	1.56961	#DIV/0!	0.650408
XM_003500994.1	11.5	6.99433	2	1.90929	0	0	P60059	2e-25	#DIV/0!	0.272976	#DIV/0!	-1.87315
XM_003514820.1	0	0	1	0.18442	0	0	Q8NGF3	7e-152	#DIV/0!	#DIV/0!	#DIV/0!	#DIV/0!
XM_003506619.1	1.33333	0.050637	1	0.0596104	0	0	Q9Y2J2	0	#DIV/0!	1.17721	#DIV/0!	0.23537
XM_003499874.1	3.07143	0.0611886	1	0.0312696	0	0	Q15014	2e-61	#DIV/0!	0.511036	#DIV/0!	-0.968502
XM_003513813.1	0.333333	0.0901041	0.333333	0.141429	0	0	Q8IUG1	8e-27	#DIV/0!	1.56961	#DIV/0!	0.650408
XM_003515640.1	0	0	1	0.128292	0	0	A8K7I4	1e-127	#DIV/0!	#DIV/0!	#DIV/0!	#DIV/0!
XM_003498738.1	1	0.0341894	2.5	0.13416	0	0	Q8NDG6	4e-113	#DIV/0!	3.92403	#DIV/0!	1.97234
XM_003496682.1	0.25	0.198836	1	1.24838	0	0	P62891	1e-23	#DIV/0!	6.27845	#DIV/0!	2.65041
XM_003503235.1	6	0.274701	1	0.0718624	0	0	Q9BYF1	0	#DIV/0!	0.261602	#DIV/0!	-1.93455
XM_003510701.1	1	0.0765885	1	0.120214	0	0	Q8N1N0	3e-121	#DIV/0!	1.56961	#DIV/0!	0.650408
XM_003509629.1	0	0	1	0.0726939	0	0	P41180	1e-113	#DIV/0!	#DIV/0!	#DIV/0!	#DIV/0!
XM_003507381.1	3	0.121087	2	0.126706	0	0	O75626	0	#DIV/0!	1.04641	#DIV/0!	0.0654453
XM_003511289.1	0	0	1	0.554835	0	0	Q5T870	2e-40	#DIV/0!	#DIV/0!	#DIV/0!	#DIV/0!
XM_003505740.1	9	0.724164	3	0.378885	0	0	Q8IY51	0	#DIV/0!	0.523204	#DIV/0!	-0.934555
XM_003495893.1	0	0	2	0.310601	0	0	Q8WWN9	2e-153	#DIV/0!	#DIV/0!	#DIV/0!	#DIV/0!
XM_003503393.1	0	0	1	0.102391	0	0	Q8NEG5	0	#DIV/0!	#DIV/0!	#DIV/0!	#DIV/0!
XM_003515965.1	0	0	1	0.373795	0	0	Q7Z3Y9	8e-62	#DIV/0!	#DIV/0!	#DIV/0!	#DIV/0!
XM_003509998.1	0	0	1	0.249676	0	0		NA	#DIV/0!	#DIV/0!	#DIV/0!	#DIV/0!
XM_003509567.1	4	0.243639	4	0.382419	0	0	Q969S8	0	#DIV/0!	1.56961	#DIV/0!	0.650408
XM_003515905.1	0.5	0.0632382	1	0.198519	0	0	P58181	1e-151	#DIV/0!	3.13922	#DIV/0!	1.65041
XM_003513954.1	0	0	0.75	0.0821025	0	0	Q8N8V2	0	#DIV/0!	#DIV/0!	#DIV/0!	#DIV/0!
XM_003513230.1	9	5.6397	7	6.885	0	0		NA	#DIV/0!	1.22081	#DIV/0!	0.287838
XM_003503866.1	3	0.12558	1	0.0657041	0	0	Q15431	0	#DIV/0!	0.523204	#DIV/0!	-0.934555
XM_003501323.1	1	0.0537813	1	0.0844157	0	0	P19801	0	#DIV/0!	1.56961	#DIV/0!	0.650408
XM_003501770.1	0	0	1	0.564484	0	0		NA	#DIV/0!	#DIV/0!	#DIV/0!	#DIV/0!
XM_003508742.1	3	1.27911	1	0.669234	0	0	P11684	5e-24	#DIV/0!	0.523204	#DIV/0!	-0.934555
XM_003497392.1	6	0.532504	3	0.417912	0	0	A8MVG2	7e-78	#DIV/0!	0.784806	#DIV/0!	-0.349592
XM_003509921.1	0.666667	0.0574414	2.08333	0.281752	0	0	P43353	0	#DIV/0!	4.90504	#DIV/0!	2.29426
XM_003495431.1	9	0.158324	1	0.027612	0	0	Q99102	0	#DIV/0!	0.174401	#DIV/0!	-2.51952
XM_003506248.1	0	0	1	0.782117	0	0	P0C2S0	3e-30	#DIV/0!	#DIV/0!	#DIV/0!	#DIV/0!
XM_003505210.1	0	0	1	0.189259	0	0	Q13606	1e-146	#DIV/0!	#DIV/0!	#DIV/0!	#DIV/0!
XM_003503920.1	0	0	0.333333	0.0461377	0	0	P41586	0	#DIV/0!	#DIV/0!	#DIV/0!	#DIV/0!
XM_003499474.1	3	0.303111	1	0.158589	0	0	Q96HF1	2e-169	#DIV/0!	0.523204	#DIV/0!	-0.934555
XM_003514450.1	0	0	1	0.208063	0	0	Q8NGN6	9e-155	#DIV/0!	#DIV/0!	#DIV/0!	#DIV/0!
XM_003500575.1	2.14286	0.495105	1	0.362658	0	0		NA	#DIV/0!	0.732486	#DIV/0!	-0.449128
XM_003495186.1	0	0	2	0.519326	0	0	Q8NET6	1e-30	#DIV/0!	#DIV/0!	#DIV/0!	#DIV/0!
XM_003500735.1	0.5	0.0371923	0.5	0.0583774	0	0	P57082	0	#DIV/0!	1.56961	#DIV/0!	0.650408
XM_003496288.1	0.5	0.0199347	0.5	0.0312897	0	0	Q96JH8	0	#DIV/0!	1.56961	#DIV/0!	0.650408
XM_003501676.1	4	0.331525	1	0.130092	0	0	Q5JU00	0	#DIV/0!	0.392403	#DIV/0!	-1.34959
XM_003496761.1	0	0	1	0.0853031	0	0	Q8IXH8	0	#DIV/0!	#DIV/0!	#DIV/0!	#DIV/0!
XM_003499076.1	8	0.213368	2	0.0837262	0	0	Q149M9	0	#DIV/0!	0.392403	#DIV/0!	-1.34959
XM_003501410.1	6.16667	0.106563	0.333333	0.00904118	0	0	Q9UL68	2e-47	#DIV/0!	0.0848439	#DIV/0!	-3.55905
XM_003497271.1	12	1.69383	1	0.221555	0	0	Q8N4C7	5e-134	#DIV/0!	0.130801	#DIV/0!	-2.93455
XM_003516187.1	1.66667	0.43171	0.333333	0.135523	0	0	O75474	5e-23	#DIV/0!	0.313922	#DIV/0!	-1.67152
XM_003511385.1	0	0	1	0.204781	0	0	Q8NGI8	4e-116	#DIV/0!	#DIV/0!	#DIV/0!	#DIV/0!
XM_003497259.1	3	0.185184	1	0.0968891	0	0	P18054	0	#DIV/0!	0.523204	#DIV/0!	-0.934555
XM_003502946.1	1	0.0491769	1	0.0771887	0	0	Q9H5Y7	0	#DIV/0!	1.56961	#DIV/0!	0.650408
XM_003515431.1	0	0	0.5	0.103041	0	0	Q8WZ92	3e-114	#DIV/0!	#DIV/0!	#DIV/0!	#DIV/0!
XM_003514465.1	1	0.0461583	1	0.0724506	0	0	Q9UMZ3	2e-42	#DIV/0!	1.56961	#DIV/0!	0.650408
XM_003507743.1	2	0.164445	4	0.516228	0	0	Q8NA69	8e-179	#DIV/0!	3.13922	#DIV/0!	1.65041
XM_003510233.1	3	0.633028	2	0.662405	0	0		NA	#DIV/0!	1.04641	#DIV/0!	0.0654453
XM_003495534.1	0	0	1	0.766721	0	0		NA	#DIV/0!	#DIV/0!	#DIV/0!	#DIV/0!
XM_003495900.1	6	0.229766	1	0.0601071	0	0	O15119	0	#DIV/0!	0.261602	#DIV/0!	-1.93455
XM_003495595.1	1	0.131156	2	0.411727	0	0	O95832	4e-87	#DIV/0!	3.13922	#DIV/0!	1.65041
XM_003515489.1	0	0	1	0.338103	0	0	P41222	7e-71	#DIV/0!	#DIV/0!	#DIV/0!	#DIV/0!
XM_003507642.1	1	0.0533649	1	0.0837622	0	0		NA	#DIV/0!	1.56961	#DIV/0!	0.650408
XM_003502766.1	0	0	1	0.405723	0	0	P49763	4e-47	#DIV/0!	#DIV/0!	#DIV/0!	#DIV/0!
XM_003502833.1	2	0.121462	2	0.190648	0	0	Q8IYX3	8e-123	#DIV/0!	1.56961	#DIV/0!	0.650408
XM_003513999.1	4	0.479511	1	0.188161	0	0	Q86W47	6e-99	#DIV/0!	0.392403	#DIV/0!	-1.34959
XM_003515189.1	3.5	0.297233	0.5	0.0666486	0	0	P78413	1e-156	#DIV/0!	0.22423	#DIV/0!	-2.15695
XM_003499566.1	2	0.212819	2	0.334043	0	0	Q3SY56	0	#DIV/0!	1.56961	#DIV/0!	0.650408
XM_003507462.1	5	0.3216	2	0.201915	0	0	P03951	0	#DIV/0!	0.627845	#DIV/0!	-0.67152
XM_003503362.1	17	3.64292	7	2.35446	0	0	Q9Y272	5e-73	#DIV/0!	0.646311	#DIV/0!	-0.6297
XM_003510972.1	12	0.368717	7	0.3376	0	0	Q8N7X0	0	#DIV/0!	0.915607	#DIV/0!	-0.1272
XM_003511123.1	2	0.143603	2	0.225402	0	0	P26599	6e-175	#DIV/0!	1.56961	#DIV/0!	0.650408
XM_003509283.1	4	0.388336	1	0.152384	0	0	O14764	0	#DIV/0!	0.392403	#DIV/0!	-1.34959
XM_003508634.1	2	0.106592	1	0.0836542	0	0	P27487	0	#DIV/0!	0.784806	#DIV/0!	-0.349592
XM_003497798.1	1	0.0653362	1	0.102552	0	0	Q9NUZ1	0	#DIV/0!	1.56961	#DIV/0!	0.650408
XM_003515876.1	3	3.41486	1.33333	2.38223	0	0		NA	#DIV/0!	0.697605	#DIV/0!	-0.519517
XM_003506257.1	3.33333	0.244576	0.666667	0.0767779	0	0	P32243	9e-136	#DIV/0!	0.313922	#DIV/0!	-1.67152
XM_003496485.1	0.5	0.0151679	0.5	0.0238077	0	0	P26378	0	#DIV/0!	1.56961	#DIV/0!	0.650408
XM_003510008.1	4	1.27255	2	0.998703	0	0	P80162	7e-27	#DIV/0!	0.784806	#DIV/0!	-0.349592
XM_003512623.1	0	0	1	0.192058	0	0	Q8NGJ5	2e-96	#DIV/0!	#DIV/0!	#DIV/0!	#DIV/0!
XM_003502019.1	45	2.23421	18	1.40274	0	0	Q9Y468	0	#DIV/0!	0.627845	#DIV/0!	-0.67152
XM_003509098.1	1	0.135156	1	0.212143	0	0	Q8NG99	4e-106	#DIV/0!	1.56961	#DIV/0!	0.650408
XM_003511859.1	0	0	0.5	0.0989569	0	0	Q8NGK5	5e-98	#DIV/0!	#DIV/0!	#DIV/0!	#DIV/0!
XM_003512635.1	5	0.67358	1	0.211452	0	0	Q8TDM6	5e-25	#DIV/0!	0.313922	#DIV/0!	-1.67152
XM_003511247.1	1	0.138785	1	0.217838	0	0	A6NI73	7e-72	#DIV/0!	1.56961	#DIV/0!	0.650408
XM_003509878.1	1	0.217673	1	0.341662	0	0		NA	#DIV/0!	1.56961	#DIV/0!	0.650408
XM_003509622.1	1	0.0914996	1	0.143619	0	0	P51589	1e-92	#DIV/0!	1.56961	#DIV/0!	0.650408
XM_003503264.1	0	0	1	0.336351	0	0	Q8N4G2	6e-85	#DIV/0!	#DIV/0!	#DIV/0!	#DIV/0!
XM_003495964.1	4	0.251415	4	0.394624	0	0	Q8IVI9	0	#DIV/0!	1.56961	#DIV/0!	0.650408
XM_003515513.1	3	0.190297	1	0.099564	0	0	Q68BL7	0	#DIV/0!	0.523204	#DIV/0!	-0.934555
XM_003508967.1	1.5	0.216912	0.5	0.113489	0	0		NA	#DIV/0!	0.523204	#DIV/0!	-0.934555
XM_003502523.1	5	0.75196	3	0.708171	0	0	Q9H0E9	4e-43	#DIV/0!	0.941767	#DIV/0!	-0.0865577
XM_003495183.1	1	0.0680974	3	0.320659	0	0	Q86VQ6	0	#DIV/0!	4.70884	#DIV/0!	2.23537
XM_003508132.1	4	0.473563	1	0.185827	0	0	Q9BS86	3e-150	#DIV/0!	0.392403	#DIV/0!	-1.34959
XM_003497584.1	0	0	0.5	0.0492781	0	0	P52569	0	#DIV/0!	#DIV/0!	#DIV/0!	#DIV/0!
XM_003501692.1	0.2	0.012864	0.2	0.0201915	0	0	O00712	0	#DIV/0!	1.56961	#DIV/0!	0.650408
XM_003500709.1	1	0.0495897	1.5	0.116755	0	0	P51160	0	#DIV/0!	2.35442	#DIV/0!	1.23537
XM_003498015.1	1	0.164772	1	0.258628	0	0	Q96L46	2e-91	#DIV/0!	1.56961	#DIV/0!	0.650408
XM_003508873.1	10	1.16501	7	1.28003	0	0	A6NJB7	2e-84	#DIV/0!	1.09873	#DIV/0!	0.135835
XM_003512655.1	0	0	1	0.135807	0	0	Q8TCU3	0	#DIV/0!	#DIV/0!	#DIV/0!	#DIV/0!
XM_003496370.1	0	0	2	0.733511	0	0	Q8N9R6	1e-33	#DIV/0!	#DIV/0!	#DIV/0!	#DIV/0!
XM_003497518.1	4	0.438035	1	0.171886	0	0	P03999	0	#DIV/0!	0.392403	#DIV/0!	-1.34959
XM_003513928.1	0.5	0.0652331	1	0.204781	0	0	Q8NH61	6e-112	#DIV/0!	3.13922	#DIV/0!	1.65041
XM_003515700.1	1	0.0544899	0.5	0.042764	0	0	O75022	5e-31	#DIV/0!	0.784806	#DIV/0!	-0.349592
XM_003499846.1	3	0.174998	2	0.183119	0	0	P49802	0	#DIV/0!	1.04641	#DIV/0!	0.0654453
XM_003503306.1	1	0.051762	1.5	0.121869	0	0	Q9NS62	2e-157	#DIV/0!	2.35442	#DIV/0!	1.23537
XM_003509677.1	24	1.96942	4	0.515204	0	0	P20815	0	#DIV/0!	0.261602	#DIV/0!	-1.93455
XM_003510175.1	0	0	0.5	0.138709	0	0	Q9UMR7	7e-63	#DIV/0!	#DIV/0!	#DIV/0!	#DIV/0!
XM_003504808.1	0	0	2	0.0910459	0	0	Q6IQ23	0	#DIV/0!	#DIV/0!	#DIV/0!	#DIV/0!
XM_003498631.1	8	0.445306	7	0.611588	0	0	Q7L0J3	0	#DIV/0!	1.37341	#DIV/0!	0.457763
XM_003509071.1	0	0	1	0.10947	0	0	Q86T96	0	#DIV/0!	#DIV/0!	#DIV/0!	#DIV/0!
XM_003511858.1	0	0	1	0.206082	0	0	Q8NGK2	1e-77	#DIV/0!	#DIV/0!	#DIV/0!	#DIV/0!
XM_003513852.1	26	2.86747	12	2.0773	0	0	Q16621	6e-157	#DIV/0!	0.724436	#DIV/0!	-0.465069
XM_003499899.1	6	2.03399	2	1.06419	0	0	P61457	2e-56	#DIV/0!	0.523204	#DIV/0!	-0.934555
XM_003515961.1	4	1.24384	1	0.488088	0	0	P10636	7e-31	#DIV/0!	0.392403	#DIV/0!	-1.34959
XM_003506681.1	1	0.0893257	2	0.280413	0	0	Q6ICH7	0	#DIV/0!	3.13922	#DIV/0!	1.65041
XM_003500718.1	0	0	1	0.166451	0	0	Q2M3R5	2e-113	#DIV/0!	#DIV/0!	#DIV/0!	#DIV/0!
XM_003510009.1	3	0.254249	1	0.133024	0	0	Q9P0L2	3e-62	#DIV/0!	0.523204	#DIV/0!	-0.934555
XM_003505436.1	0	0	1	0.203497	0	0	Q8NGL6	3e-113	#DIV/0!	#DIV/0!	#DIV/0!	#DIV/0!
XM_003509748.1	1	0.0989421	1	0.155301	0	0	Q9BRI3	2e-122	#DIV/0!	1.56961	#DIV/0!	0.650408
XM_003508944.1	0	0	2	0.37201	0	0	A6NFE2	3e-71	#DIV/0!	#DIV/0!	#DIV/0!	#DIV/0!
XM_003512991.1	0	0	0.5	0.105042	0	0	Q6IFN5	2e-92	#DIV/0!	#DIV/0!	#DIV/0!	#DIV/0!
XM_003516059.1	0	0	1	0.205429	0	0	Q15620	3e-117	#DIV/0!	#DIV/0!	#DIV/0!	#DIV/0!
XM_003510944.1	0	0	0.5	0.0617069	0	0	O00748	0	#DIV/0!	#DIV/0!	#DIV/0!	#DIV/0!
XM_003513491.1	0	0	1	0.192058	0	0	Q9BZM3	4e-68	#DIV/0!	#DIV/0!	#DIV/0!	#DIV/0!
XM_003514644.1	2	0.270312	2	0.424286	0	0		NA	#DIV/0!	1.56961	#DIV/0!	0.650408
XM_003515473.1	0	0	1	0.170831	0	0	P14679	8e-170	#DIV/0!	#DIV/0!	#DIV/0!	#DIV/0!
XM_003495869.1	1	0.1252	1	0.196516	0	0	Q6PHW0	2e-123	#DIV/0!	1.56961	#DIV/0!	0.650408
XM_003495977.1	1	0.12236	1	0.192058	0	0	Q8IYL9	6e-155	#DIV/0!	1.56961	#DIV/0!	0.650408
XM_003500673.1	0	0	1	0.169051	0	0	O00590	1e-127	#DIV/0!	#DIV/0!	#DIV/0!	#DIV/0!
XM_003513696.1	0.666667	0.030399	0.333333	0.0238573	0	0	Q05586	0	#DIV/0!	0.784806	#DIV/0!	-0.349592
XM_003496421.1	0	0	1	0.72939	0	0	Q8N6N7	3e-39	#DIV/0!	#DIV/0!	#DIV/0!	#DIV/0!
XM_003513099.1	1	0.168807	1	0.264962	0	0	O95156	1e-136	#DIV/0!	1.56961	#DIV/0!	0.650408
XM_003497947.1	1	0.140196	3	0.66016	0	0	Q96B33	2e-106	#DIV/0!	4.70884	#DIV/0!	2.23537
XM_003506383.1	0	0	1	0.24313	0	0	Q9NZN9	2e-140	#DIV/0!	#DIV/0!	#DIV/0!	#DIV/0!
XM_003512017.1	1	0.0484851	1	0.0761028	0	0	Q6ZN28	0	#DIV/0!	1.56961	#DIV/0!	0.650408
XM_003512629.1	2.5	0.323108	1	0.202862	0	0	Q9H346	2e-146	#DIV/0!	0.627845	#DIV/0!	-0.67152
XM_003500645.1	3	0.0344744	1	0.0180371	0	0	Q7Z408	5e-48	#DIV/0!	0.523204	#DIV/0!	-0.934555
XM_003500140.1	10	0.343598	2	0.107863	0	0	Q9UQB3	0	#DIV/0!	0.313922	#DIV/0!	-1.67152
XM_003505433.1	0	0	2	0.408275	0	0	Q8NH83	3e-125	#DIV/0!	#DIV/0!	#DIV/0!	#DIV/0!
XM_003511387.1	0	0	1	0.207398	0	0	Q8NGI8	3e-123	#DIV/0!	#DIV/0!	#DIV/0!	#DIV/0!
XM_003503090.1	16	4.29691	13	5.4799	0	0	Q9H4X1	2e-42	#DIV/0!	1.27531	#DIV/0!	0.350848
XM_003512846.1	1	0.0467848	1	0.073434	0	0	Q86VR7	0	#DIV/0!	1.56961	#DIV/0!	0.650408
XM_003495484.1	1	0.0572823	1	0.0899109	0	0	Q8IWZ5	0	#DIV/0!	1.56961	#DIV/0!	0.650408
XM_003503648.1	0	0	2	0.299151	0	0	A8MY62	7e-29	#DIV/0!	#DIV/0!	#DIV/0!	#DIV/0!
XM_003495317.1	2	0.19281	2	0.302637	0	0	Q9UK05	0	#DIV/0!	1.56961	#DIV/0!	0.650408
XM_003505346.1	0	0	3	0.417017	0	0	Q6X9E4	1e-71	#DIV/0!	#DIV/0!	#DIV/0!	#DIV/0!
XM_003500565.1	0.333333	0.0632382	0.333333	0.0992595	0	0		NA	#DIV/0!	1.56961	#DIV/0!	0.650408
XM_003515227.1	1	0.0994178	1	0.156047	0	0	Q9UIR0	8e-41	#DIV/0!	1.56961	#DIV/0!	0.650408
XM_003512885.1	2	0.234101	1	0.183724	0	0	Q8NGJ2	6e-137	#DIV/0!	0.784806	#DIV/0!	-0.349592
XM_003514146.1	4	0.249896	6	0.58836	0	0	Q8N8V2	0	#DIV/0!	2.35442	#DIV/0!	1.23537
XM_003508330.1	1	0.0765885	1	0.120214	0	0	Q9Y694	0	#DIV/0!	1.56961	#DIV/0!	0.650408
XM_003513751.1	0.333333	0.047051	1	0.221555	0	0	A6NJ16	5e-33	#DIV/0!	4.70884	#DIV/0!	2.23537
XM_003500227.1	1	0.153177	2	0.480857	0	0	O94907	1e-120	#DIV/0!	3.13922	#DIV/0!	1.65041
XM_003501457.1	0	0	0.5	0.0725045	0	0	P56178	5e-144	#DIV/0!	#DIV/0!	#DIV/0!	#DIV/0!
XM_003503186.1	5	0.284964	2	0.178913	0	0	Q9NXZ2	0	#DIV/0!	0.627845	#DIV/0!	-0.67152
XM_003508096.1	1	0.171609	1	0.26936	0	0	A8MPT4	2e-105	#DIV/0!	1.56961	#DIV/0!	0.650408
XM_003506679.1	2	0.0324757	2	0.0509742	0	0	Q8IUG5	0	#DIV/0!	1.56961	#DIV/0!	0.650408
XM_003512466.1	1	0.135156	1.33333	0.282857	0	0	Q8NGF8	5e-139	#DIV/0!	2.09282	#DIV/0!	1.06545
XM_003511955.1	3	0.0913424	1	0.0477907	0	0	Q13023	0	#DIV/0!	0.523204	#DIV/0!	-0.934555
XM_003504481.1	2	0.0741179	1	0.0581682	0	0	Q5IJ48	2e-21	#DIV/0!	0.784806	#DIV/0!	-0.349592
XM_003508031.1	1	0.126476	2	0.397038	0	0	O15442	0	#DIV/0!	3.13922	#DIV/0!	1.65041
XM_003496483.1	0.5	0.0153253	0.5	0.0240547	0	0	P26378	0	#DIV/0!	1.56961	#DIV/0!	0.650408
XM_003498984.1	4	0.538864	1	0.211452	0	0	O75995	1e-93	#DIV/0!	0.392403	#DIV/0!	-1.34959
XM_003512002.1	0	0	1	0.338103	0	0	P35548	3e-39	#DIV/0!	#DIV/0!	#DIV/0!	#DIV/0!
XM_003507712.1	0	0	1	0.199128	0	0	Q6IFN5	1e-77	#DIV/0!	#DIV/0!	#DIV/0!	#DIV/0!
XM_003510294.1	8	1.47706	3	0.869407	0	0	P49788	1e-82	#DIV/0!	0.588604	#DIV/0!	-0.76463
XM_003498739.1	2	0.353485	1	0.277418	0	0	Q6ZVK1	1e-96	#DIV/0!	0.784806	#DIV/0!	-0.349592
XM_003511027.1	9	1.11111	1	0.193778	0	0	Q96P65	1e-150	#DIV/0!	0.174401	#DIV/0!	-2.51952
XM_003512130.1	4.96026	0.268515	2.4	0.203924	0	0	Q9Y5E2	0	#DIV/0!	0.75945	#DIV/0!	-0.396972
XM_003502532.1	0	0	1	0.331203	0	0	Q9H1J5	5e-64	#DIV/0!	#DIV/0!	#DIV/0!	#DIV/0!
XM_003510400.1	0.333333	0.0425492	1	0.200357	0	0	Q8NHA4	8e-125	#DIV/0!	4.70884	#DIV/0!	2.23537
XM_003509742.1	6	0.386522	3	0.303344	0	0	Q8IZ20	2e-130	#DIV/0!	0.784806	#DIV/0!	-0.349592
XM_003510609.1	2	0.12236	1	0.0960291	0	0	Q86W26	0	#DIV/0!	0.784806	#DIV/0!	-0.349592
XM_003514714.1	0	0	0.333333	0.0691328	0	0	Q8N349	4e-147	#DIV/0!	#DIV/0!	#DIV/0!	#DIV/0!
XM_003509255.1	2	0.299694	1	0.235202	0	0	Q2HXU8	1e-103	#DIV/0!	0.784806	#DIV/0!	-0.349592
XM_003512021.1	4	0.520224	2	0.408275	0	0	P12271	4e-146	#DIV/0!	0.784806	#DIV/0!	-0.349592
XM_003508032.1	1	0.0605531	1	0.0950449	0	0	Q5THR3	0	#DIV/0!	1.56961	#DIV/0!	0.650408
XM_003509348.1	0	0	2	0.217109	0	0	P54829	0	#DIV/0!	#DIV/0!	#DIV/0!	#DIV/0!
XM_003505003.1	1	0.130879	1	0.205429	0	0	Q8NGS9	2e-95	#DIV/0!	1.56961	#DIV/0!	0.650408
XM_003505644.1	2	0.104969	1	0.0823803	0	0	Q92481	0	#DIV/0!	0.784806	#DIV/0!	-0.349592
XM_003499782.1	34	4.34002	13	2.60464	0	0	Q6IFN5	3e-123	#DIV/0!	0.600146	#DIV/0!	-0.736615
XM_003507107.1	1	0.0823861	1	0.129314	0	0	Q9UBG3	5e-95	#DIV/0!	1.56961	#DIV/0!	0.650408
XM_003515524.1	0	0	1	0.148322	0	0	Q8IXT2	1e-136	#DIV/0!	#DIV/0!	#DIV/0!	#DIV/0!
XM_003510325.1	0	0	3	0.664666	0	0	O75897	2e-55	#DIV/0!	#DIV/0!	#DIV/0!	#DIV/0!
XM_003511805.1	0	0	1	0.135147	0	0	P41180	1e-45	#DIV/0!	#DIV/0!	#DIV/0!	#DIV/0!
XM_003497261.1	15	0.558219	4	0.23365	0	0	Q9HCJ2	0	#DIV/0!	0.418563	#DIV/0!	-1.25648
XM_003515051.1	0	0	1	0.232673	0	0	P01764	9e-34	#DIV/0!	#DIV/0!	#DIV/0!	#DIV/0!
XM_003515446.1	2	0.366539	1	0.287662	0	0	P06127	4e-86	#DIV/0!	0.784806	#DIV/0!	-0.349592
XM_003515774.1	2	0.347545	0.5	0.136378	0	0	Q8NH80	9e-85	#DIV/0!	0.392403	#DIV/0!	-1.34959
XM_003510332.1	3	0.459531	1	0.240429	0	0		NA	#DIV/0!	0.523204	#DIV/0!	-0.934555
XM_003495367.1	6	0.532123	1	0.139204	0	0	Q9UPC5	0	#DIV/0!	0.261602	#DIV/0!	-1.93455
XM_003512850.1	0	0	1	0.349009	0	0	P53420	3e-102	#DIV/0!	#DIV/0!	#DIV/0!	#DIV/0!
XM_003514584.1	1	0.133844	1	0.210083	0	0	Q8NH09	1e-68	#DIV/0!	1.56961	#DIV/0!	0.650408
XM_003512183.1	0	0	1	0.217109	0	0	Q7Z5H5	9e-32	#DIV/0!	#DIV/0!	#DIV/0!	#DIV/0!
XM_003499252.1	0	0	1	0.721286	0	0	Q8NHW6	2e-37	#DIV/0!	#DIV/0!	#DIV/0!	#DIV/0!
XM_003511133.1	0	0	3	0.998703	0	0	Q6XYB7	4e-72	#DIV/0!	#DIV/0!	#DIV/0!	#DIV/0!
XM_003500316.1	7	0.426998	4	0.382983	0	0	O75916	0	#DIV/0!	0.896921	#DIV/0!	-0.156947
XM_003513195.1	12.6667	0.982862	1.91667	0.233437	0	0	Q13885	0	#DIV/0!	0.237507	#DIV/0!	-2.07396
XM_003506895.1	0	0	1	0.453956	0	0	Q9NZK7	3e-78	#DIV/0!	#DIV/0!	#DIV/0!	#DIV/0!
XM_003503201.1	1.5	0.235582	0.333333	0.0821718	0	0	Q99217	1e-46	#DIV/0!	0.348803	#DIV/0!	-1.51952
XM_003515604.1	0	0	1	0.206738	0	0	Q8NGQ6	2e-105	#DIV/0!	#DIV/0!	#DIV/0!	#DIV/0!
XM_003498594.1	0	0	1	0.115714	0	0	Q86SE5	1e-59	#DIV/0!	#DIV/0!	#DIV/0!	#DIV/0!
XM_003495231.1	1.66667	0.326681	0.833333	0.256381	0	0	P78369	5e-86	#DIV/0!	0.784806	#DIV/0!	-0.349592
XM_003500546.1	1	0.0473743	1	0.0743593	0	0	Q06732	5e-84	#DIV/0!	1.56961	#DIV/0!	0.650408
XM_003514955.1	1	0.0720519	1	0.113094	0	0	P12035	5e-126	#DIV/0!	1.56961	#DIV/0!	0.650408
XM_003500577.1	1.14286	0.192923	0.333333	0.0883207	0	0		NA	#DIV/0!	0.457803	#DIV/0!	-1.1272
XM_003511323.1	1.5	0.153177	1	0.160286	0	0	O76009	0	#DIV/0!	1.04641	#DIV/0!	0.0654453
XM_003504388.1	1	0.232347	1	0.364695	0	0	P17936	1e-86	#DIV/0!	1.56961	#DIV/0!	0.650408
XM_003514404.1	0.25	0.0199989	1	0.125562	0	0	Q9NSB4	0	#DIV/0!	6.27845	#DIV/0!	2.65041
XM_003505200.1	4	0.499792	1	0.19612	0	0	Q8NGL7	9e-111	#DIV/0!	0.392403	#DIV/0!	-1.34959
XM_003506751.1	0	0	1	0.321365	0	0		NA	#DIV/0!	#DIV/0!	#DIV/0!	#DIV/0!
XM_003497348.1	0.5	0.0413578	1	0.129831	0	0	Q02928	0	#DIV/0!	3.13922	#DIV/0!	1.65041
XM_003514402.1	1.41667	0.123869	0.333333	0.0457475	0	0	P78386	0	#DIV/0!	0.36932	#DIV/0!	-1.43705
XM_003514439.1	0	0	2	0.142203	0	0	A8K7I4	0	#DIV/0!	#DIV/0!	#DIV/0!	#DIV/0!
XM_003506848.1	2	0.16347	1	0.128292	0	0	Q9UJ37	3e-150	#DIV/0!	0.784806	#DIV/0!	-0.349592
XM_003501225.1	2	0.165101	1	0.129572	0	0	Q6GTS8	0	#DIV/0!	0.784806	#DIV/0!	-0.349592
XM_003515081.1	0.25	0.0378734	0.5	0.118893	0	0	Q9UJQ4	8e-109	#DIV/0!	3.13922	#DIV/0!	1.65041
XM_003507432.1	8	0.975995	8	1.53193	0	0	Q9C019	4e-117	#DIV/0!	1.56961	#DIV/0!	0.650408
XM_003513156.1	0	0	1	0.170831	0	0	P43699	7e-38	#DIV/0!	#DIV/0!	#DIV/0!	#DIV/0!
XM_003505746.1	3	0.201745	1	0.105554	0	0	Q9UN79	0	#DIV/0!	0.523204	#DIV/0!	-0.934555
XM_003512157.1	0	0	0.5	0.101749	0	0	Q8NH95	4e-139	#DIV/0!	#DIV/0!	#DIV/0!	#DIV/0!
XM_003496679.1	1	0.111177	2	0.349009	0	0	P47775	1e-168	#DIV/0!	3.13922	#DIV/0!	1.65041
XM_003496454.1	1	0.0439509	1	0.0689859	0	0	Q8NCS7	0	#DIV/0!	1.56961	#DIV/0!	0.650408
XM_003495515.1	0.4	0.0174138	0.2	0.0136665	0	0	P39086	0	#DIV/0!	0.784806	#DIV/0!	-0.349592
XM_003505077.1	2	0.889415	1	0.698018	0	0	P61513	9e-45	#DIV/0!	0.784806	#DIV/0!	-0.349592
XM_003509205.1	18	1.39408	2	0.24313	0	0	A6NCF5	0	#DIV/0!	0.174401	#DIV/0!	-2.51952
XM_003506503.1	3	0.340861	1	0.17834	0	0	O15165	2e-135	#DIV/0!	0.523204	#DIV/0!	-0.934555
XM_003504742.1	0.5	0.0254353	0.5	0.0399236	0	0	Q8WXD0	0	#DIV/0!	1.56961	#DIV/0!	0.650408
XM_003513427.1	0	0	1	0.206738	0	0	Q8N136	4e-51	#DIV/0!	#DIV/0!	#DIV/0!	#DIV/0!
XM_003510694.1	1	0.0780336	1	0.122482	0	0	P09923	0	#DIV/0!	1.56961	#DIV/0!	0.650408
XM_003495945.1	5	0.324799	4	0.407847	0	0	Q99259	0	#DIV/0!	1.25569	#DIV/0!	0.32848
XM_003511417.1	0	0	1	0.206082	0	0	Q15617	7e-129	#DIV/0!	#DIV/0!	#DIV/0!	#DIV/0!
XM_003497221.1	0	0	1	0.241322	0	0	Q96M95	2e-93	#DIV/0!	#DIV/0!	#DIV/0!	#DIV/0!
XM_003499835.1	7	0.196942	4	0.176641	0	0	Q9NZ56	0	#DIV/0!	0.896921	#DIV/0!	-0.156947
XM_003496110.1	0	0	2	0.216386	0	0	Q8NE62	0	#DIV/0!	#DIV/0!	#DIV/0!	#DIV/0!
XM_003507748.1	4	0.265682	1	0.104254	0	0	Q15833	0	#DIV/0!	0.392403	#DIV/0!	-1.34959
XM_003503499.1	1	0.093995	2	0.295071	0	0	Q7Z3H4	1e-153	#DIV/0!	3.13922	#DIV/0!	1.65041
XM_003508453.1	3	0.14377	2	0.150442	0	0	Q9P0L9	0	#DIV/0!	1.04641	#DIV/0!	0.0654453
XM_003495374.1	0	0	0.333333	0.100179	0	0	P02794	3e-52	#DIV/0!	#DIV/0!	#DIV/0!	#DIV/0!
XM_003508416.1	0	0	1	0.54551	0	0	Q9NR55	9e-36	#DIV/0!	#DIV/0!	#DIV/0!	#DIV/0!
XM_003510606.1	1	0.112692	1	0.176882	0	0	Q7Z5B4	4e-134	#DIV/0!	1.56961	#DIV/0!	0.650408
XM_003511908.1	1	0.0619129	1	0.0971792	0	0	Q8WWX8	0	#DIV/0!	1.56961	#DIV/0!	0.650408
XM_003506379.1	1	0.122723	1	0.192628	0	0	Q2TAL5	3e-97	#DIV/0!	1.56961	#DIV/0!	0.650408
XM_003513301.1	1	0.0487327	1	0.0764914	0	0	Q06710	0	#DIV/0!	1.56961	#DIV/0!	0.650408
XM_003495719.1	2	0.144355	3	0.339873	0	0	P48436	3e-73	#DIV/0!	2.35442	#DIV/0!	1.23537
XM_003510899.1	1	0.0566287	1	0.088885	0	0	Q14324	6e-24	#DIV/0!	1.56961	#DIV/0!	0.650408
XM_003496184.1	1	0.0545138	1	0.0855655	0	0	P52823	4e-130	#DIV/0!	1.56961	#DIV/0!	0.650408
XM_003514940.1	7.5	0.852153	1.5	0.26751	0	0	A6NCK2	5e-31	#DIV/0!	0.313922	#DIV/0!	-1.67152
XM_003503665.1	0	0	2	0.38111	0	0	Q8NHC8	4e-151	#DIV/0!	#DIV/0!	#DIV/0!	#DIV/0!
XM_003515494.1	0	0	1.5	0.450803	0	0	Q8NH00	8e-68	#DIV/0!	#DIV/0!	#DIV/0!	#DIV/0!
XM_003508929.1	0	0	1	0.155301	0	0	P15088	0	#DIV/0!	#DIV/0!	#DIV/0!	#DIV/0!
XM_003497701.1	3	0.0275046	2	0.0287811	0	0	P04114	0	#DIV/0!	1.04641	#DIV/0!	0.0654453
XM_003505781.1	7	0.230804	1	0.0517531	0	0	Q08462	0	#DIV/0!	0.22423	#DIV/0!	-2.15695
XM_003500964.1	1	0.0980043	1	0.153829	0	0	Q86VF5	4e-141	#DIV/0!	1.56961	#DIV/0!	0.650408
XM_003500699.1	0	0	1	0.194553	0	0		NA	#DIV/0!	#DIV/0!	#DIV/0!	#DIV/0!
XM_003509323.1	1	0.0633351	1	0.0994115	0	0	Q05516	0	#DIV/0!	1.56961	#DIV/0!	0.650408
XM_003500525.1	1	0.142613	0.5	0.111924	0	0	P25942	2e-93	#DIV/0!	0.784806	#DIV/0!	-0.349592
XM_003497788.1	3	0.216156	1	0.113094	0	0	Q9NRU3	0	#DIV/0!	0.523204	#DIV/0!	-0.934555
XM_003499606.1	3	0.780336	1	0.408275	0	0	A8MV24	7e-70	#DIV/0!	0.523204	#DIV/0!	-0.934555
XM_003511842.1	0.666667	0.19281	0.333333	0.151319	0	0	P69905	4e-50	#DIV/0!	0.784806	#DIV/0!	-0.349592
XM_003515283.1	0	0	1	0.204137	0	0	Q96R54	5e-126	#DIV/0!	#DIV/0!	#DIV/0!	#DIV/0!
XM_003508030.1	0	0	0.5	0.0318526	0	0	Q8IWY4	0	#DIV/0!	#DIV/0!	#DIV/0!	#DIV/0!
XM_003501086.1	3	0.244079	1	0.127703	0	0	Q93099	0	#DIV/0!	0.523204	#DIV/0!	-0.934555
XM_003513860.1	2	0.446307	1	0.350265	0	0	A8MTI9	4e-71	#DIV/0!	0.784806	#DIV/0!	-0.349592
XM_003512525.1	3.5	0.188725	1	0.0846358	0	0	P41180	4e-97	#DIV/0!	0.448461	#DIV/0!	-1.15695
XM_003496031.1	3	0.196319	6	0.616288	0	0	Q9NR20	0	#DIV/0!	3.13922	#DIV/0!	1.65041
XM_003508220.1	6	0.685488	3	0.537975	0	0	P02765	6e-106	#DIV/0!	0.784806	#DIV/0!	-0.349592
XM_003503882.1	1	0.0444867	1.5	0.10474	0	0	P58417	5e-150	#DIV/0!	2.35442	#DIV/0!	1.23537
XM_003515084.1	0.47619	0.024961	0.142857	0.0117537	0	0	O75022	2e-83	#DIV/0!	0.470884	#DIV/0!	-1.08656
XM_003500605.1	0	0	1	0.112701	0	0	O75144	4e-66	#DIV/0!	#DIV/0!	#DIV/0!	#DIV/0!
XM_003511806.1	6.5	0.834862	2	0.403203	0	0		NA	#DIV/0!	0.482957	#DIV/0!	-1.05003
XM_003500110.1	0.5	0.00909762	0.5	0.0142797	0	0	Q15878	0	#DIV/0!	1.56961	#DIV/0!	0.650408
XM_003514494.1	2	0.454481	3	1.07004	0	0	Q6ZRY4	4e-86	#DIV/0!	2.35442	#DIV/0!	1.23537
XM_003496392.1	0.5	0.0383179	0.25	0.0300721	0	0	O95319	0	#DIV/0!	0.784806	#DIV/0!	-0.349592
XM_003510411.1	0	0	1	0.25064	0	0	Q8NFK1	1e-99	#DIV/0!	#DIV/0!	#DIV/0!	#DIV/0!
XM_003497287.1	1	0.0630454	0.5	0.0494784	0	0	Q8N3Y3	0	#DIV/0!	0.784806	#DIV/0!	-0.349592
XM_003502461.1	5	0.636274	2	0.399481	0	0	P22748	7e-41	#DIV/0!	0.627845	#DIV/0!	-0.67152
XM_003502904.1	7	2.08277	3	1.40106	0	0	P29373	2e-73	#DIV/0!	0.672691	#DIV/0!	-0.571985
XM_003503202.1	1	0.17426	0.333333	0.0911737	0	0	Q99217	6e-27	#DIV/0!	0.523204	#DIV/0!	-0.934555
XM_003509802.1	3	0.228918	1	0.119771	0	0	Q86Y34	0	#DIV/0!	0.523204	#DIV/0!	-0.934555
XM_003498235.1	1	0.0366647	1	0.0575494	0	0	Q6WKZ4	0	#DIV/0!	1.56961	#DIV/0!	0.650408
XM_003505265.1	8	0.066345	7	0.0911189	0	0	Q92736	0	#DIV/0!	1.37341	#DIV/0!	0.457763
XM_003506694.1	1	0.100873	0.5	0.0791655	0	0	A6NFN3	2e-101	#DIV/0!	0.784806	#DIV/0!	-0.349592
XM_003506157.1	4	0.360417	1	0.141429	0	0	A8MU46	5e-129	#DIV/0!	0.392403	#DIV/0!	-1.34959
XM_003505999.1	6	0.800474	4	0.837622	0	0	Q8NH90	1e-119	#DIV/0!	1.04641	#DIV/0!	0.0654453
XM_003509176.1	0	0	3	0.537975	0	0	Q8NHS9	4e-143	#DIV/0!	#DIV/0!	#DIV/0!	#DIV/0!
XM_003495037.1	0	0	1	0.132481	0	0	O94788	0	#DIV/0!	#DIV/0!	#DIV/0!	#DIV/0!
XM_003502334.1	2	0.183812	4	0.577028	0	0	Q8NFQ5	2e-166	#DIV/0!	3.13922	#DIV/0!	1.65041
XM_003501312.1	3	0.219988	2	0.230198	0	0	Q7Z7K2	0	#DIV/0!	1.04641	#DIV/0!	0.0654453
XM_003506637.1	0	0	1	0.0770056	0	0	Q04671	0	#DIV/0!	#DIV/0!	#DIV/0!	#DIV/0!
XM_003497241.1	6	1.08836	4	1.13887	0	0	O60248	6e-75	#DIV/0!	1.04641	#DIV/0!	0.0654453
XM_003507230.1	3.5	0.392283	4	0.703693	0	0	O00292	1e-153	#DIV/0!	1.79384	#DIV/0!	0.843053
XM_003514111.1	2.5	0.176141	2	0.221178	0	0		NA	#DIV/0!	1.25569	#DIV/0!	0.32848
XM_003497697.1	10	0.799442	2	0.250963	0	0	A6NFX1	0	#DIV/0!	0.313922	#DIV/0!	-1.67152
XM_003508958.1	0	0	1	0.403203	0	0	Q8TBE1	3e-85	#DIV/0!	#DIV/0!	#DIV/0!	#DIV/0!
XM_003514998.1	2.5	0.170618	0.5	0.0535608	0	0	Q01546	2e-137	#DIV/0!	0.313922	#DIV/0!	-1.67152
XM_003508155.1	0	0	1	0.550133	0	0		NA	#DIV/0!	#DIV/0!	#DIV/0!	#DIV/0!
XM_003502660.1	0	0	1	0.207398	0	0	Q6IF42	5e-78	#DIV/0!	#DIV/0!	#DIV/0!	#DIV/0!
XM_003503697.1	0	0	2	0.431334	0	0	A6NM36	2e-142	#DIV/0!	#DIV/0!	#DIV/0!	#DIV/0!
XM_003504335.1	0	0	1	0.115099	0	0	Q9NUV7	0	#DIV/0!	#DIV/0!	#DIV/0!	#DIV/0!
XM_003511766.1	1	0.0792295	1	0.12436	0	0	Q8IV45	0	#DIV/0!	1.56961	#DIV/0!	0.650408
XM_003495898.1	1	0.062537	2	0.196318	0	0	Q99593	0	#DIV/0!	3.13922	#DIV/0!	1.65041
XM_003514012.1	0	0	1	0.124838	0	0	Q86SJ2	0	#DIV/0!	#DIV/0!	#DIV/0!	#DIV/0!
XM_003498502.1	6	1.53177	1	0.400714	0	0	P35225	2e-34	#DIV/0!	0.261602	#DIV/0!	-1.93455
XM_003505359.1	3	0.359286	2	0.37596	0	0	Q96MS3	5e-166	#DIV/0!	1.04641	#DIV/0!	0.0654453
XM_003506559.1	2	0.0403491	1	0.0316662	0	0	P56715	9e-55	#DIV/0!	0.784806	#DIV/0!	-0.349592
XM_003512058.1	1	0.0423603	1	0.0664893	0	0	O75443	4e-114	#DIV/0!	1.56961	#DIV/0!	0.650408
XM_003510593.1	0	0	1	0.194942	0	0	Q8NGQ6	3e-153	#DIV/0!	#DIV/0!	#DIV/0!	#DIV/0!
XM_003500580.1	4	0.110214	1	0.0432483	0	0	O94759	0	#DIV/0!	0.392403	#DIV/0!	-1.34959
XM_003515276.1	0	0	0.5	0.0634769	0	0	P41180	3e-39	#DIV/0!	#DIV/0!	#DIV/0!	#DIV/0!
XM_003516121.1	0.333333	0.0656473	0.333333	0.103041	0	0	Q2M2I5	8e-25	#DIV/0!	1.56961	#DIV/0!	0.650408
XM_003501213.1	0	0	1	0.152743	0	0	P47901	0	#DIV/0!	#DIV/0!	#DIV/0!	#DIV/0!
XM_003512465.1	0	0	1.33333	0.285658	0	0	Q8NGF8	1e-138	#DIV/0!	#DIV/0!	#DIV/0!	#DIV/0!
XM_003504928.1	3	0.3418	2	0.357662	0	0	O75764	2e-137	#DIV/0!	1.04641	#DIV/0!	0.0654453
XM_003499797.1	1	0.179817	1	0.282242	0	0	Q6ZP80	2e-107	#DIV/0!	1.56961	#DIV/0!	0.650408
XM_003513139.1	0	0	1	0.194747	0	0	Q9NZP2	7e-126	#DIV/0!	#DIV/0!	#DIV/0!	#DIV/0!
XM_003513688.1	2	0.439977	1	0.345296	0	0	Q9NPH6	9e-30	#DIV/0!	0.784806	#DIV/0!	-0.349592
XM_003507986.1	0	0	1	0.120437	0	0	Q14190	0	#DIV/0!	#DIV/0!	#DIV/0!	#DIV/0!
XM_003505832.1	0	0	1	0.224622	0	0	Q86UF4	1e-64	#DIV/0!	#DIV/0!	#DIV/0!	#DIV/0!
XM_003511860.1	0	0	0.5	0.103041	0	0	Q8NGK5	1e-98	#DIV/0!	#DIV/0!	#DIV/0!	#DIV/0!
XM_003502968.1	1	0.175245	1	0.275067	0	0	Q8NA82	1e-31	#DIV/0!	1.56961	#DIV/0!	0.650408
XM_003508724.1	0	0	0.5	0.129831	0	0	O43749	1e-75	#DIV/0!	#DIV/0!	#DIV/0!	#DIV/0!
XM_003500781.1	4	0.102944	2	0.0807912	0	0	P13569	0	#DIV/0!	0.784806	#DIV/0!	-0.349592
XM_003505880.1	0	0	1	0.20265	0	0	P28068	2e-96	#DIV/0!	#DIV/0!	#DIV/0!	#DIV/0!
XM_003505247.1	12	0.192362	9	0.22645	0	0	Q9Y6R7	0	#DIV/0!	1.17721	#DIV/0!	0.23537
XM_003511359.1	0	0	1	0.205429	0	0	O43869	7e-99	#DIV/0!	#DIV/0!	#DIV/0!	#DIV/0!
XM_003504476.1	1.5	0.161134	1	0.168612	0	0	Q8NGR2	6e-156	#DIV/0!	1.04641	#DIV/0!	0.0654453
XM_003515493.1	0	0	0.333333	0.0599406	0	0	Q8NH02	5e-139	#DIV/0!	#DIV/0!	#DIV/0!	#DIV/0!
XM_003510464.1	1	0.0754704	2	0.236919	0	0	P23141	0	#DIV/0!	3.13922	#DIV/0!	1.65041
XM_003515565.1	3	0.344648	1	0.180321	0	0	P25025	6e-129	#DIV/0!	0.523204	#DIV/0!	-0.934555
XM_003509257.1	1	0.133844	1	0.210083	0	0	Q9BXN2	3e-71	#DIV/0!	1.56961	#DIV/0!	0.650408
XM_003497589.1	6	0.518052	5	0.677617	0	0	Q15198	2e-179	#DIV/0!	1.30801	#DIV/0!	0.387373
XM_003507373.1	0	0	1	0.169493	0	0	Q8N8N0	3e-116	#DIV/0!	#DIV/0!	#DIV/0!	#DIV/0!
XM_003513887.1	3	0.0981852	1	0.0513709	0	0	Q8NDV3	0	#DIV/0!	0.523204	#DIV/0!	-0.934555
XM_003513912.1	1.5	0.0631738	2	0.132211	0	0	Q96MN2	0	#DIV/0!	2.09282	#DIV/0!	1.06545
XM_003496565.1	0	0	1	0.0851912	0	0	P10242	3e-116	#DIV/0!	#DIV/0!	#DIV/0!	#DIV/0!
XM_003501338.1	5	0.393135	3	0.370242	0	0	P32929	0	#DIV/0!	0.941767	#DIV/0!	-0.0865577
XM_003507436.1	1	0.118844	1	0.186539	0	0	P10314	1e-86	#DIV/0!	1.56961	#DIV/0!	0.650408
XM_003499468.1	10	0.772081	13	1.57543	0	0	Q8TBY0	0	#DIV/0!	2.0405	#DIV/0!	1.02892
XM_003503115.1	1	0.101616	1	0.159498	0	0	Q9BWX5	4e-150	#DIV/0!	1.56961	#DIV/0!	0.650408
XM_003508307.1	1	0.0302988	1	0.0475573	0	0	Q96J65	0	#DIV/0!	1.56961	#DIV/0!	0.650408
XM_003510193.1	1	0.162826	1	0.255574	0	0	Q92876	4e-102	#DIV/0!	1.56961	#DIV/0!	0.650408
XM_003499578.1	3	0.23366	1	0.122252	0	0	Q02641	0	#DIV/0!	0.523204	#DIV/0!	-0.934555
XM_003515209.1	1.39286	0.0796757	0.642857	0.0577199	0	0	Q6PI73	5e-82	#DIV/0!	0.724436	#DIV/0!	-0.465069
XM_003495007.1	0	0	1	0.0640826	0	0	Q5T0W9	0	#DIV/0!	#DIV/0!	#DIV/0!	#DIV/0!
XM_003512931.1	0	0	3	0.444628	0	0	Q96MG7	1e-109	#DIV/0!	#DIV/0!	#DIV/0!	#DIV/0!
XM_003499733.1	2	0.206273	1	0.161885	0	0	Q9H228	2e-108	#DIV/0!	0.784806	#DIV/0!	-0.349592
XM_003501688.1	0.2	0.0100505	0.2	0.0157754	0	0	O00712	0	#DIV/0!	1.56961	#DIV/0!	0.650408
XM_003502085.1	2	0.0770882	1	0.0604993	0	0	Q8NFM4	0	#DIV/0!	0.784806	#DIV/0!	-0.349592
XM_003499447.1	0	0	1	0.0775576	0	0	Q4G0U5	0	#DIV/0!	#DIV/0!	#DIV/0!	#DIV/0!
XM_003513604.1	0	0	2	0.33036	0	0	Q9Y691	2e-132	#DIV/0!	#DIV/0!	#DIV/0!	#DIV/0!
XM_003515052.1	0	0	1	0.248719	0	0	P01768	7e-27	#DIV/0!	#DIV/0!	#DIV/0!	#DIV/0!
XM_003505576.1	3	0.168807	4	0.353283	0	0	Q6E0U4	6e-43	#DIV/0!	2.09282	#DIV/0!	1.06545
XM_003498249.1	6	0.331304	7	0.606689	0	0	Q9Y3Q7	3e-163	#DIV/0!	1.83121	#DIV/0!	0.8728
XM_003503646.1	0	0	1	0.0606122	0	0	P29322	0	#DIV/0!	#DIV/0!	#DIV/0!	#DIV/0!
XM_003516077.1	2	0.444708	0.583333	0.203589	0	0		NA	#DIV/0!	0.457803	#DIV/0!	-1.1272
XM_003501877.1	1	0.170197	3	0.801428	0	0	Q7Z6M3	5e-24	#DIV/0!	4.70884	#DIV/0!	2.23537
XM_003499290.1	0.25	0.0219521	0.25	0.0344563	0	0	P11137	2e-65	#DIV/0!	1.56961	#DIV/0!	0.650408
XM_003511287.1	0.5	0.078627	1	0.246828	0	0	P01737	2e-35	#DIV/0!	3.13922	#DIV/0!	1.65041
XM_003511620.1	1	0.313317	2	0.983571	0	0	Q17RF5	6e-24	#DIV/0!	3.13922	#DIV/0!	1.65041
XM_003512413.1	1	0.0818966	1	0.128546	0	0	P37023	0	#DIV/0!	1.56961	#DIV/0!	0.650408
XM_003508551.1	2	0.626633	2	0.983571	0	0	O00253	2e-42	#DIV/0!	1.56961	#DIV/0!	0.650408
XM_003507077.1	1	0.03707	1	0.0581856	0	0	Q9UQ52	0	#DIV/0!	1.56961	#DIV/0!	0.650408
XM_003497278.1	2	0.435345	1	0.341662	0	0	O14683	5e-79	#DIV/0!	0.784806	#DIV/0!	-0.349592
XM_003496742.1	0	0	1	0.112506	0	0	Q96F45	2e-131	#DIV/0!	#DIV/0!	#DIV/0!	#DIV/0!
XM_003514919.1	0	0	1.5	0.344889	0	0	Q9UHF1	4e-124	#DIV/0!	#DIV/0!	#DIV/0!	#DIV/0!
XM_003499135.1	0	0	2	0.300536	0	0	Q9BX97	1e-109	#DIV/0!	#DIV/0!	#DIV/0!	#DIV/0!
XM_003516112.1	1	0.175245	1	0.275067	0	0	Q8WZ94	1e-84	#DIV/0!	1.56961	#DIV/0!	0.650408
XM_003499854.1	10	0.950754	4	0.596926	0	0	A8MW95	2e-105	#DIV/0!	0.627845	#DIV/0!	-0.67152
XM_003508240.1	0	0	1	0.523514	0	0		NA	#DIV/0!	#DIV/0!	#DIV/0!	#DIV/0!
XM_003513695.1	0.666667	0.0311195	0.333333	0.0244228	0	0	Q05586	0	#DIV/0!	0.784806	#DIV/0!	-0.349592
XM_003503807.1	11	0.364629	5	0.260148	0	0	Q8IX18	0	#DIV/0!	0.71346	#DIV/0!	-0.487096
XM_003513483.1	2	0.198836	4	0.624189	0	0	Q9NZH0	4e-165	#DIV/0!	3.13922	#DIV/0!	1.65041
XM_003513140.1	0.5	0.065028	1	0.204137	0	0	Q9NZP2	8e-127	#DIV/0!	3.13922	#DIV/0!	1.65041
XM_003514500.1	0.666667	0.0672485	0.5	0.0791655	0	0	Q8NGE0	1e-129	#DIV/0!	1.17721	#DIV/0!	0.23537
XM_003506769.1	1	0.207828	1	0.32621	0	0	P09038	9e-50	#DIV/0!	1.56961	#DIV/0!	0.650408
XM_003509647.1	1	0.0436724	2	0.137098	0	0	P59046	1e-100	#DIV/0!	3.13922	#DIV/0!	1.65041
XM_003497602.1	0	0	1	0.0645285	0	0	Q5T7N3	0	#DIV/0!	#DIV/0!	#DIV/0!	#DIV/0!
XM_003511854.1	1	0.122481	1	0.192248	0	0	Q8NGJ4	1e-152	#DIV/0!	1.56961	#DIV/0!	0.650408
XM_003504315.1	2	0.148769	2	0.23351	0	0	Q49A17	0	#DIV/0!	1.56961	#DIV/0!	0.650408
XM_003505665.1	2	0.0498187	1	0.039098	0	0	Q7Z4N2	0	#DIV/0!	0.784806	#DIV/0!	-0.349592
XM_003508457.1	1	0.0845763	2	0.265504	0	0	Q9UJT9	0	#DIV/0!	3.13922	#DIV/0!	1.65041
XM_003516116.1	0	0	0.333333	0.0801428	0	0	Q9GZP7	2e-28	#DIV/0!	#DIV/0!	#DIV/0!	#DIV/0!
XM_003513820.1	1.83333	0.435762	0.333333	0.12436	0	0	Q8IUG1	4e-32	#DIV/0!	0.285384	#DIV/0!	-1.80902
XM_003496188.1	2	0.12218	1	0.0958873	0	0	P07196	0	#DIV/0!	0.784806	#DIV/0!	-0.349592
XM_003499689.1	1	0.0914996	1	0.143619	0	0	P43166	1e-137	#DIV/0!	1.56961	#DIV/0!	0.650408
XM_003502858.1	0	0	1	0.248719	0	0	Q5T9Z0	3e-55	#DIV/0!	#DIV/0!	#DIV/0!	#DIV/0!
XM_003512128.1	1.51026	0.129856	0.316667	0.0427373	0	0	Q9Y5E5	7e-36	#DIV/0!	0.329112	#DIV/0!	-1.60335
XM_003514383.1	3	0.211729	1.66667	0.184629	0	0	Q9BY79	0	#DIV/0!	0.872007	#DIV/0!	-0.197589
XM_003504907.1	1.75	0.133289	4.5	0.537975	0	0	Q5TF39	6e-151	#DIV/0!	4.03614	#DIV/0!	2.01298
XM_003509793.1	3	0.108047	2	0.113061	0	0	Q9UNA0	0	#DIV/0!	1.04641	#DIV/0!	0.0654453
XM_003496785.1	2	0.213185	1	0.167308	0	0	Q86YV6	0	#DIV/0!	0.784806	#DIV/0!	-0.349592
XM_003514954.1	1	0.0693923	2	0.217838	0	0	P19013	2e-171	#DIV/0!	3.13922	#DIV/0!	1.65041
XM_003515012.1	0	0	1	0.224622	0	0	Q96L15	3e-23	#DIV/0!	#DIV/0!	#DIV/0!	#DIV/0!
XM_003498899.1	0	0	1	0.208732	0	0	Q92858	3e-131	#DIV/0!	#DIV/0!	#DIV/0!	#DIV/0!
XM_003499792.1	1	0.104969	1	0.164761	0	0	Q92847	0	#DIV/0!	1.56961	#DIV/0!	0.650408
XM_003509136.1	1	0.0545138	0.5	0.0427828	0	0	Q8NFF2	0	#DIV/0!	0.784806	#DIV/0!	-0.349592
XM_003516172.1	0	0	0.333333	0.0924725	0	0	Q7Z5H5	4e-28	#DIV/0!	#DIV/0!	#DIV/0!	#DIV/0!
XM_003498319.1	3	0.605236	1	0.316662	0	0	P35453	5e-117	#DIV/0!	0.523204	#DIV/0!	-0.934555
XM_003508486.1	0	0	2	0.422904	0	0	Q06643	2e-55	#DIV/0!	#DIV/0!	#DIV/0!	#DIV/0!
XM_003506499.1	4	0.374279	1	0.146868	0	0	Q01718	5e-145	#DIV/0!	0.392403	#DIV/0!	-1.34959
XM_003512624.1	0	0	1	0.207398	0	0	Q9H344	3e-160	#DIV/0!	#DIV/0!	#DIV/0!	#DIV/0!
XM_003515495.1	3	0.289666	2	0.303108	0	0	Q9BQE5	1e-35	#DIV/0!	1.04641	#DIV/0!	0.0654453
XM_003512251.1	0.45	0.0590826	0.5	0.103041	0	0	Q8NGG8	7e-102	#DIV/0!	1.74401	#DIV/0!	0.802411
XM_003512060.1	1	0.0978497	2	0.307172	0	0	O43680	3e-81	#DIV/0!	3.13922	#DIV/0!	1.65041
XM_003500749.1	1	0.149847	3	0.705605	0	0	Q9P0K9	1e-124	#DIV/0!	4.70884	#DIV/0!	2.23537
XM_003497728.1	7	0.851484	1	0.190929	0	0	Q8TDX5	3e-180	#DIV/0!	0.22423	#DIV/0!	-2.15695
XM_003515000.1	2	0.16187	3	0.38111	0	0	Q7Z794	2e-168	#DIV/0!	2.35442	#DIV/0!	1.23537
XM_003496094.1	4	0.361994	4	0.56819	0	0	P01730	8e-127	#DIV/0!	1.56961	#DIV/0!	0.650408
XM_003504741.1	0.5	0.0243759	1.5	0.114782	0	0	Q8WXD0	0	#DIV/0!	4.70884	#DIV/0!	2.23537
XM_003498402.1	0	0	0.333333	0.0259455	0	0	Q14D04	0	#DIV/0!	#DIV/0!	#DIV/0!	#DIV/0!
XM_003498122.1	0	0	1	0.220802	0	0	P78337	3e-77	#DIV/0!	#DIV/0!	#DIV/0!	#DIV/0!
XM_003504382.1	1	0.131713	0.5	0.103369	0	0	Q8NGT9	1e-129	#DIV/0!	0.784806	#DIV/0!	-0.349592
XM_003497414.1	0	0	0.333333	0.0495162	0	0	Q8NDH6	0	#DIV/0!	#DIV/0!	#DIV/0!	#DIV/0!
XM_003510990.1	8	1.39213	5	1.36569	0	0	Q9ULZ3	6e-72	#DIV/0!	0.981007	#DIV/0!	-0.0276641
XM_003498913.1	4	0.617281	1	0.242223	0	0	Q12967	2e-23	#DIV/0!	0.392403	#DIV/0!	-1.34959
XM_003512879.1	3	0.30941	2	0.323769	0	0		NA	#DIV/0!	1.04641	#DIV/0!	0.0654453
XM_003510166.1	5	0.783292	2	0.491786	0	0	P17538	6e-139	#DIV/0!	0.627845	#DIV/0!	-0.67152
XM_003509946.1	0.333333	0.0293943	0.25	0.0346032	0	0	P43353	0	#DIV/0!	1.17721	#DIV/0!	0.23537
XM_003515550.1	2	0.238832	1	0.187437	0	0	P23582	2e-36	#DIV/0!	0.784806	#DIV/0!	-0.349592
XM_003504200.1	0	0	3	0.422445	0	0	P04070	3e-176	#DIV/0!	#DIV/0!	#DIV/0!	#DIV/0!
XM_003513814.1	0.25	0.0789271	0.5	0.24777	0	0	A8MTN3	2e-24	#DIV/0!	3.13922	#DIV/0!	1.65041
XM_003503881.1	1	0.0441071	0.5	0.0346156	0	0	P58417	5e-150	#DIV/0!	0.784806	#DIV/0!	-0.349592
XM_003495229.1	1.66667	0.240173	1.33333	0.301583	0	0	P78369	2e-122	#DIV/0!	1.25569	#DIV/0!	0.32848
XM_003508677.1	0	0	1	0.177851	0	0	P19526	2e-143	#DIV/0!	#DIV/0!	#DIV/0!	#DIV/0!
XM_003506299.1	5	0.224283	2	0.140815	0	0	Q8IX30	0	#DIV/0!	0.627845	#DIV/0!	-0.67152
XM_003515266.1	0	0	2	0.42153	0	0	A6NM03	8e-132	#DIV/0!	#DIV/0!	#DIV/0!	#DIV/0!
XM_003516020.1	3	1.13829	0.333333	0.198519	0	0		NA	#DIV/0!	0.174401	#DIV/0!	-2.51952
XM_003495514.1	1.4	0.0630043	0.2	0.0141275	0	0	P39086	0	#DIV/0!	0.22423	#DIV/0!	-2.15695
XM_003513811.1	0.25	0.0789271	0.5	0.24777	0	0	A8MTN3	2e-24	#DIV/0!	3.13922	#DIV/0!	1.65041
XM_003506544.1	1	0.102118	1	0.160286	0	0	O15482	4e-118	#DIV/0!	1.56961	#DIV/0!	0.650408
XM_003510232.1	2	0.121284	2	0.190369	0	0	Q99424	0	#DIV/0!	1.56961	#DIV/0!	0.650408
XM_003500907.1	4	0.41152	1	0.161482	0	0	Q8TAP4	2e-86	#DIV/0!	0.392403	#DIV/0!	-1.34959
XM_003503748.1	0	0	1	0.331203	0	0	Q9BX93	5e-98	#DIV/0!	#DIV/0!	#DIV/0!	#DIV/0!
XM_003512314.1	7	0.499146	4	0.447694	0	0	Q8N1H7	4e-179	#DIV/0!	0.896921	#DIV/0!	-0.156947
XM_003499925.1	0	0	4	0.630249	0	0	Q9H788	5e-167	#DIV/0!	#DIV/0!	#DIV/0!	#DIV/0!
XM_003497864.1	0	0	1.5	0.226626	0	0	Q8IYP9	7e-156	#DIV/0!	#DIV/0!	#DIV/0!	#DIV/0!
XM_003496391.1	3.5	0.17308	0.25	0.0194049	0	0	O95319	0	#DIV/0!	0.112115	#DIV/0!	-3.15695
XM_003506524.1	0	0	1	0.169936	0	0	Q9NXB9	3e-163	#DIV/0!	#DIV/0!	#DIV/0!	#DIV/0!
XM_003502780.1	1	0.075196	1	0.118029	0	0	Q9Y6S9	0	#DIV/0!	1.56961	#DIV/0!	0.650408
XM_003497765.1	6.5	0.334777	2.5	0.202104	0	0	Q9NQ79	0	#DIV/0!	0.603697	#DIV/0!	-0.728104
XM_003509291.1	0	0	1	0.135807	0	0	Q7LGC8	0	#DIV/0!	#DIV/0!	#DIV/0!	#DIV/0!
XM_003514750.1	0	0	1	0.0672005	0	0	Q96JA4	6e-101	#DIV/0!	#DIV/0!	#DIV/0!	#DIV/0!
XM_003495492.1	1.5	0.228918	1	0.239541	0	0		NA	#DIV/0!	1.04641	#DIV/0!	0.0654453
XM_003510423.1	0	0	0.5	0.144901	0	0	Q9UKJ1	8e-43	#DIV/0!	#DIV/0!	#DIV/0!	#DIV/0!
XM_003500542.1	0	0	2	0.238223	0	0	O95528	0	#DIV/0!	#DIV/0!	#DIV/0!	#DIV/0!
XM_003511425.1	1	0.130879	1	0.205429	0	0	Q15617	4e-124	#DIV/0!	1.56961	#DIV/0!	0.650408
XM_003495345.1	10	3.04101	6	2.86393	0	0	P08118	4e-24	#DIV/0!	0.941767	#DIV/0!	-0.0865577
XM_003515752.1	3	0.585252	1	0.306206	0	0	Q6PXP3	1e-86	#DIV/0!	0.523204	#DIV/0!	-0.934555
XM_003503069.1	19	0.611041	15	0.757182	0	0		NA	#DIV/0!	1.23917	#DIV/0!	0.309371
XM_003505561.1	0	0	1	0.167741	0	0	Q8NFZ6	1e-68	#DIV/0!	#DIV/0!	#DIV/0!	#DIV/0!
XM_003505123.1	7.5	0.238786	1	0.0499736	0	0	O95428	0	#DIV/0!	0.209282	#DIV/0!	-2.25648
XM_003509832.1	0	0	1	0.435676	0	0	Q8WXS3	4e-36	#DIV/0!	#DIV/0!	#DIV/0!	#DIV/0!
XM_003510920.1	1	0.126864	2.5	0.49782	0	0	Q5VUY2	4e-116	#DIV/0!	3.92403	#DIV/0!	1.97234
XM_003506232.1	3	0.237689	1	0.12436	0	0	Q92527	1e-33	#DIV/0!	0.523204	#DIV/0!	-0.934555
XM_003501898.1	0	0	2	1.77851	0	0	Q9UBI6	5e-21	#DIV/0!	#DIV/0!	#DIV/0!	#DIV/0!
XM_003500601.1	1	0.171609	1	0.26936	0	0		NA	#DIV/0!	1.56961	#DIV/0!	0.650408
XM_003496287.1	0.5	0.016726	1.5	0.0787599	0	0	Q96JH8	0	#DIV/0!	4.70884	#DIV/0!	2.23537
XM_003514936.1	2.5	0.213625	0.5	0.0670617	0	0	P46098	0	#DIV/0!	0.313922	#DIV/0!	-1.67152
XM_003500576.1	0	0	1	0.304769	0	0		NA	#DIV/0!	#DIV/0!	#DIV/0!	#DIV/0!
XM_003496605.1	0	0	1	0.0942629	0	0	Q66K79	0	#DIV/0!	#DIV/0!	#DIV/0!	#DIV/0!
XM_003512845.1	4	0.186928	2	0.146702	0	0	Q96LC7	0	#DIV/0!	0.784806	#DIV/0!	-0.349592
XM_003509747.1	2	0.208878	1	0.163929	0	0	Q969Q1	2e-179	#DIV/0!	0.784806	#DIV/0!	-0.349592
XM_003497915.1	1	0.053503	0.5	0.0419895	0	0	Q96FE5	0	#DIV/0!	0.784806	#DIV/0!	-0.349592
XM_003500801.1	0.7	0.0274152	0.5	0.0307366	0	0	Q9Y4J8	0	#DIV/0!	1.12115	#DIV/0!	0.164981
XM_003497911.1	4	0.26245	1	0.102986	0	0	Q14257	2e-163	#DIV/0!	0.392403	#DIV/0!	-1.34959
XM_003506747.1	2	0.428578	1	0.336351	0	0		NA	#DIV/0!	0.784806	#DIV/0!	-0.349592
XM_003514388.1	0	0	2	0.271614	0	0	Q9BZP6	0	#DIV/0!	#DIV/0!	#DIV/0!	#DIV/0!
XM_003513927.1	0.5	0.0652331	1	0.204781	0	0	Q8NH61	3e-115	#DIV/0!	3.13922	#DIV/0!	1.65041
XM_003498005.1	1	0.0418601	2	0.131408	0	0	Q86VH4	0	#DIV/0!	3.13922	#DIV/0!	1.65041
XM_003506443.1	2	0.672485	3	1.58331	0	0		NA	#DIV/0!	2.35442	#DIV/0!	1.23537
XM_003505355.1	2	0.407466	3	0.959345	0	0	P05452	1e-83	#DIV/0!	2.35442	#DIV/0!	1.23537
XM_003507119.1	10	1.32134	1	0.207398	0	0	A6NK89	4e-79	#DIV/0!	0.156961	#DIV/0!	-2.67152
XM_003511408.1	2.5	0.0585473	2	0.0735172	0	0	Q9UN74	0	#DIV/0!	1.25569	#DIV/0!	0.32848
XM_003499542.1	2	0.103567	1	0.0812801	0	0	P23945	0	#DIV/0!	0.784806	#DIV/0!	-0.349592
XM_003514559.1	1	0.036247	1	0.0568937	0	0	Q5T890	0	#DIV/0!	1.56961	#DIV/0!	0.650408
XM_003513694.1	0.666667	0.0276364	0.333333	0.0216892	0	0	Q05586	0	#DIV/0!	0.784806	#DIV/0!	-0.349592
XM_003503103.1	1	0.154512	4	0.970098	0	0	P35625	7e-127	#DIV/0!	6.27845	#DIV/0!	2.65041
XM_003515719.1	1.33333	0.171254	0.333333	0.0672005	0	0	Q8NGT9	2e-65	#DIV/0!	0.392403	#DIV/0!	-1.34959
XM_003508921.1	0	0	1	0.116476	0	0	Q96NM4	5e-169	#DIV/0!	#DIV/0!	#DIV/0!	#DIV/0!
XM_003503668.1	0	0	1	0.241322	0	0	Q8TBG9	5e-122	#DIV/0!	#DIV/0!	#DIV/0!	#DIV/0!
XM_003508557.1	3	0.400237	1	0.209405	0	0	Q6ZW13	1e-69	#DIV/0!	0.523204	#DIV/0!	-0.934555
XM_003507527.1	0	0	2	0.271614	0	0	Q00973	2e-34	#DIV/0!	#DIV/0!	#DIV/0!	#DIV/0!
XM_003496078.1	10	0.272809	1	0.0428204	0	0	P01023	0	#DIV/0!	0.156961	#DIV/0!	-2.67152
XM_003509820.1	0	0	1	0.204781	0	0	Q53GG5	4e-143	#DIV/0!	#DIV/0!	#DIV/0!	#DIV/0!
XM_003514997.1	1.14286	0.0695089	0.142857	0.0136378	0	0	O75022	3e-35	#DIV/0!	0.196201	#DIV/0!	-2.34959
XM_003502271.1	1	0.0515683	1	0.0809423	0	0	Q9Y345	0	#DIV/0!	1.56961	#DIV/0!	0.650408
XM_003515895.1	2	0.262589	1.41667	0.291949	0	0	Q7Z5H5	6e-31	#DIV/0!	1.11181	#DIV/0!	0.152908
XM_003502107.1	2	0.225793	1	0.177204	0	0	Q8TAX0	3e-143	#DIV/0!	0.784806	#DIV/0!	-0.349592
XM_003505991.1	0	0	1	0.13468	0	0	A8MWK0	0	#DIV/0!	#DIV/0!	#DIV/0!	#DIV/0!
XM_003513789.1	0	0	1	0.198519	0	0	Q8NGI0	4e-148	#DIV/0!	#DIV/0!	#DIV/0!	#DIV/0!
XM_003514695.1	1	0.101119	1	0.158718	0	0	P0C7T3	1e-121	#DIV/0!	1.56961	#DIV/0!	0.650408
XM_003515360.1	0	0	1	0.135807	0	0		NA	#DIV/0!	#DIV/0!	#DIV/0!	#DIV/0!
XM_003513817.1	1	0.0893257	1	0.140207	0	0		NA	#DIV/0!	1.56961	#DIV/0!	0.650408
XM_003515622.1	0.333333	0.0464173	0.333333	0.0728571	0	0	Q8NGT9	2e-56	#DIV/0!	1.56961	#DIV/0!	0.650408
XM_003515326.1	1.5	0.0961809	1	0.100644	0	0	P13688	1e-28	#DIV/0!	1.04641	#DIV/0!	0.0654453
XM_003495616.1	1	0.0794324	2	0.249356	0	0	Q8N9L1	9e-148	#DIV/0!	3.13922	#DIV/0!	1.65041
XM_003515398.1	3	0.168121	1	0.0879616	0	0	P41180	1e-89	#DIV/0!	0.523204	#DIV/0!	-0.934555
XM_003505378.1	12	2.71199	5	1.77365	0	0		NA	#DIV/0!	0.654005	#DIV/0!	-0.612627
XM_003515957.1	0	0	1	0.253577	0	0	A6NJW4	1e-107	#DIV/0!	#DIV/0!	#DIV/0!	#DIV/0!
XM_003494957.1	1	0.127648	1	0.200357	0	0	Q04828	5e-130	#DIV/0!	1.56961	#DIV/0!	0.650408
XM_003505122.1	7.5	0.2429	1	0.0508345	0	0	O95428	0	#DIV/0!	0.209282	#DIV/0!	-2.25648
XM_003502515.1	3	0.416354	2	0.435676	0	0	Q86XW9	1e-115	#DIV/0!	1.04641	#DIV/0!	0.0654453
XM_003502207.1	1	0.126091	1	0.197914	0	0	P29460	2e-141	#DIV/0!	1.56961	#DIV/0!	0.650408
XM_003497069.1	8	0.846195	4	0.664099	0	0	Q99726	1e-166	#DIV/0!	0.784806	#DIV/0!	-0.349592
XM_003509275.1	2	0.0867646	1	0.0680934	0	0	Q8TDF5	0	#DIV/0!	0.784806	#DIV/0!	-0.349592
XM_003500688.1	3	0.246177	2	0.257602	0	0	Q9HCP6	0	#DIV/0!	1.04641	#DIV/0!	0.0654453
XM_003509596.1	2	0.0803064	2	0.12605	0	0	Q01954	0	#DIV/0!	1.56961	#DIV/0!	0.650408
XM_003514792.1	0	0	2	0.360643	0	0	Q99678	3e-146	#DIV/0!	#DIV/0!	#DIV/0!	#DIV/0!
XM_003515538.1	1	0.0607013	0.5	0.0476387	0	0	Q9NWF9	0	#DIV/0!	0.784806	#DIV/0!	-0.349592
XM_003495864.1	1	0.0560404	1	0.0879616	0	0	Q9NS56	3e-23	#DIV/0!	1.56961	#DIV/0!	0.650408
XM_003496924.1	20	0.978883	10	0.768233	0	0	Q5FWE3	0	#DIV/0!	0.784806	#DIV/0!	-0.349592
XM_003510671.1	14	1.49615	1	0.167741	0	0	P33261	2e-88	#DIV/0!	0.112115	#DIV/0!	-3.15695
XM_003497343.1	0.333333	0.0271912	0.333333	0.0426796	0	0	Q02928	0	#DIV/0!	1.56961	#DIV/0!	0.650408
XM_003498139.1	0	0	1	0.105212	0	0	Q7Z2K8	2e-120	#DIV/0!	#DIV/0!	#DIV/0!	#DIV/0!
XM_003505975.1	2	0.0869775	5	0.341302	0	0	Q9ULE4	0	#DIV/0!	3.92403	#DIV/0!	1.97234
XM_003502891.1	1	0.0181713	1	0.0285218	0	0	Q86YW9	0	#DIV/0!	1.56961	#DIV/0!	0.650408
XM_003512657.1	1	0.0360051	1	0.056514	0	0	O15034	0	#DIV/0!	1.56961	#DIV/0!	0.650408
XM_003515795.1	0	0	0.333333	0.0429337	0	0	Q13316	1e-39	#DIV/0!	#DIV/0!	#DIV/0!	#DIV/0!
XM_003509447.1	0	0	1	0.100958	0	0	Q9HCU0	0	#DIV/0!	#DIV/0!	#DIV/0!	#DIV/0!
XM_003499073.1	0	0	1	0.164344	0	0	Q96RI0	4e-130	#DIV/0!	#DIV/0!	#DIV/0!	#DIV/0!
XM_003508505.1	0	0	2	0.43862	0	0	Q5SQ64	5e-96	#DIV/0!	#DIV/0!	#DIV/0!	#DIV/0!
XM_003508169.1	5	0.104123	1	0.0326867	0	0	Q5T5P2	0	#DIV/0!	0.313922	#DIV/0!	-1.67152
XM_003511226.1	1	0.0779845	1	0.122405	0	0	Q8N0V4	0	#DIV/0!	1.56961	#DIV/0!	0.650408
XM_003503465.1	0	0	1	0.576175	0	0		NA	#DIV/0!	#DIV/0!	#DIV/0!	#DIV/0!
XM_003513772.1	0.333333	0.0425492	1	0.200357	0	0	A6NND4	5e-105	#DIV/0!	4.70884	#DIV/0!	2.23537
XM_003496037.1	1	0.0931482	1	0.146207	0	0	P20783	4e-141	#DIV/0!	1.56961	#DIV/0!	0.650408
XM_003497741.1	1	0.0703364	1	0.110401	0	0	P51606	0	#DIV/0!	1.56961	#DIV/0!	0.650408
XM_003514601.1	7	0.778238	2	0.349009	0	0	Q9Y698	4e-122	#DIV/0!	0.448461	#DIV/0!	-1.15695
XM_003514036.1	0	0	2	0.389884	0	0	Q9Y2T6	2e-133	#DIV/0!	#DIV/0!	#DIV/0!	#DIV/0!
XM_003503518.1	1	0.0474287	1	0.0744446	0	0	Q9HBA0	0	#DIV/0!	1.56961	#DIV/0!	0.650408
XM_003515740.1	4	0.406798	1	0.159629	0	0	Q96M02	8e-123	#DIV/0!	0.392403	#DIV/0!	-1.34959
XM_003509135.1	1	0.0515898	0.5	0.040488	0	0	Q8NFF2	0	#DIV/0!	0.784806	#DIV/0!	-0.349592
XM_003512119.1	4.49756	0.233387	0.459524	0.0374282	0	0	Q9Y5E4	0	#DIV/0!	0.16037	#DIV/0!	-2.64052
XM_003501803.1	1	0.0668139	1	0.104872	0	0	Q5FVE4	3e-138	#DIV/0!	1.56961	#DIV/0!	0.650408
XM_003503129.1	3	0.189618	1	0.0992089	0	0	P43681	0	#DIV/0!	0.523204	#DIV/0!	-0.934555
XM_003513085.1	1	0.133412	0.5	0.104703	0	0	Q8NGR1	1e-147	#DIV/0!	0.784806	#DIV/0!	-0.349592
XM_003498564.1	0	0	1	0.131408	0	0	Q5VTY9	0	#DIV/0!	#DIV/0!	#DIV/0!	#DIV/0!
XM_003497412.1	0	0	0.833333	0.126099	0	0	Q8NDH6	0	#DIV/0!	#DIV/0!	#DIV/0!	#DIV/0!
XM_003514372.1	2	0.164118	2	0.257602	0	0	Q9HAT1	1e-177	#DIV/0!	1.56961	#DIV/0!	0.650408
XM_003510499.1	5	0.187819	3	0.176882	0	0	O00160	0	#DIV/0!	0.941767	#DIV/0!	-0.0865577
XM_003495313.1	1	0.161554	2	0.507154	0	0	Q8N456	2e-110	#DIV/0!	3.13922	#DIV/0!	1.65041
XM_003503160.1	0.5	0.0136585	0.25	0.0107192	0	0	O60706	0	#DIV/0!	0.784806	#DIV/0!	-0.349592
XM_003506658.1	0	0	2	0.385256	0	0	Q7Z5A4	3e-87	#DIV/0!	#DIV/0!	#DIV/0!	#DIV/0!
XM_003514371.1	1	0.222354	1	0.349009	0	0	Q8WVH0	3e-68	#DIV/0!	1.56961	#DIV/0!	0.650408
XM_003502391.1	0	0	2	0.302637	0	0	O14498	0	#DIV/0!	#DIV/0!	#DIV/0!	#DIV/0!
XM_003509141.1	5	0.498287	1	0.156423	0	0	Q8NC67	0	#DIV/0!	0.313922	#DIV/0!	-1.67152
XM_003499440.1	4	0.445906	1	0.174975	0	0	P47898	5e-115	#DIV/0!	0.392403	#DIV/0!	-1.34959
XM_003495381.1	1	0.0560404	1	0.0879616	0	0	Q15014	2e-57	#DIV/0!	1.56961	#DIV/0!	0.650408
XM_003507619.1	5	0.102118	1	0.0320571	0	0	Q6ZU64	3e-34	#DIV/0!	0.313922	#DIV/0!	-1.67152
XM_003515078.1	2.25	0.0873756	1.33333	0.0812716	0	0	Q9UJQ4	0	#DIV/0!	0.93014	#DIV/0!	-0.10448
XM_003508621.1	2	0.134497	2	0.211108	0	0	O00294	2e-169	#DIV/0!	1.56961	#DIV/0!	0.650408
XM_003508163.1	0	0	1	0.180321	0	0	P47972	1e-157	#DIV/0!	#DIV/0!	#DIV/0!	#DIV/0!
XM_003509426.1	2	0.0757932	1	0.0594829	0	0	Q8IUM7	0	#DIV/0!	0.784806	#DIV/0!	-0.349592
XM_003498812.1	0	0	1	0.128546	0	0	Q12912	2e-176	#DIV/0!	#DIV/0!	#DIV/0!	#DIV/0!
XM_003500692.1	0	0	1	0.559618	0	0	P06307	5e-34	#DIV/0!	#DIV/0!	#DIV/0!	#DIV/0!
XM_003511208.1	0	0	1	0.207398	0	0	Q96R72	1e-89	#DIV/0!	#DIV/0!	#DIV/0!	#DIV/0!
XM_003495522.1	1	0.244721	1	0.384117	0	0	Q8IUC0	5e-44	#DIV/0!	1.56961	#DIV/0!	0.650408
XM_003504194.1	0	0	1	0.212838	0	0	A6NFU8	1e-66	#DIV/0!	#DIV/0!	#DIV/0!	#DIV/0!
XM_003500015.1	35	3.59187	11	1.77189	0	0	Q86UN6	5e-47	#DIV/0!	0.493307	#DIV/0!	-1.01944
XM_003499254.1	0	0	1.33333	0.0512155	0	0	Q12756	0	#DIV/0!	#DIV/0!	#DIV/0!	#DIV/0!
XM_003499058.1	2	0.112845	3	0.265685	0	0	O95932	0	#DIV/0!	2.35442	#DIV/0!	1.23537
XM_003510287.1	0	0	3	0.577885	0	0	O95907	5e-55	#DIV/0!	#DIV/0!	#DIV/0!	#DIV/0!
XM_003513470.1	2	0.171254	1	0.134401	0	0	E9PGG2	4e-60	#DIV/0!	0.784806	#DIV/0!	-0.349592
XM_003507534.1	1	0.0644537	1	0.101167	0	0	Q9NQ94	0	#DIV/0!	1.56961	#DIV/0!	0.650408
XM_003514908.1	0.5	0.0749236	1	0.235202	0	0		NA	#DIV/0!	3.13922	#DIV/0!	1.65041
XM_003502884.1	0	0	1	0.161482	0	0	Q6P093	3e-147	#DIV/0!	#DIV/0!	#DIV/0!	#DIV/0!
XM_003495678.1	0	0	1	0.210083	0	0	Q9UGN4	3e-51	#DIV/0!	#DIV/0!	#DIV/0!	#DIV/0!
XM_003502896.1	3	0.0876225	2	0.0916888	0	0	P14616	0	#DIV/0!	1.04641	#DIV/0!	0.0654453
XM_003500113.1	0.5	0.00917431	0.5	0.0144001	0	0	Q15878	0	#DIV/0!	1.56961	#DIV/0!	0.650408
XM_003515526.1	1	0.119994	1	0.188343	0	0	Q9UNQ0	5e-75	#DIV/0!	1.56961	#DIV/0!	0.650408
XM_003496243.1	14	0.72497	2	0.16256	0	0	P78424	7e-74	#DIV/0!	0.22423	#DIV/0!	-2.15695
XM_003497914.1	1	0.0524402	0.5	0.0411553	0	0	Q96FE5	0	#DIV/0!	0.784806	#DIV/0!	-0.349592
XM_003510274.1	4	0.431935	1	0.169493	0	0	O75600	0	#DIV/0!	0.392403	#DIV/0!	-1.34959
XM_003511044.1	0	0	0.5	0.097471	0	0	P08034	4e-155	#DIV/0!	#DIV/0!	#DIV/0!	#DIV/0!
XM_003506653.1	3	0.0910296	2	0.0952541	0	0	Q9ULJ8	2e-53	#DIV/0!	1.04641	#DIV/0!	0.0654453
XM_003515562.1	0	0	1	0.0732407	0	0	O94813	0	#DIV/0!	#DIV/0!	#DIV/0!	#DIV/0!
XM_003507842.1	0	0	1	0.234353	0	0	Q13520	1e-109	#DIV/0!	#DIV/0!	#DIV/0!	#DIV/0!
XM_003510072.1	1	0.0950754	1	0.149231	0	0	Q5PT55	4e-158	#DIV/0!	1.56961	#DIV/0!	0.650408
XM_003506000.1	0	0	1	0.206082	0	0	P0C626	2e-142	#DIV/0!	#DIV/0!	#DIV/0!	#DIV/0!
XM_003505725.1	0.25	0.00668787	0.333333	0.0139965	0	0	P01023	0	#DIV/0!	2.09282	#DIV/0!	1.06545
XM_003497830.1	5	1.01867	3	0.959345	0	0	Q05923	9e-103	#DIV/0!	0.941767	#DIV/0!	-0.0865577
XM_003511980.1	0	0	1	0.132933	0	0	Q9Y6H5	0	#DIV/0!	#DIV/0!	#DIV/0!	#DIV/0!
XM_003498737.1	5	0.149091	2.5	0.117007	0	0	Q8NDG6	0	#DIV/0!	0.784806	#DIV/0!	-0.349592
XM_003513268.1	0	0	1	0.0644005	0	0	Q9NX02	0	#DIV/0!	#DIV/0!	#DIV/0!	#DIV/0!
XM_003503713.1	4	0.111627	2	0.0876055	0	0	Q9C0K0	0	#DIV/0!	0.784806	#DIV/0!	-0.349592
XM_003515295.1	4	0.245447	1	0.0963141	0	0	P15144	0	#DIV/0!	0.392403	#DIV/0!	-1.34959
XM_003498401.1	0	0	0.333333	0.0259455	0	0	Q14D04	0	#DIV/0!	#DIV/0!	#DIV/0!	#DIV/0!
XM_003498879.1	2	0.152331	1	0.11955	0	0	Q8N9I0	0	#DIV/0!	0.784806	#DIV/0!	-0.349592
XM_003499583.1	0	0	1	0.315125	0	0	Q9UD71	1e-73	#DIV/0!	#DIV/0!	#DIV/0!	#DIV/0!
XM_003515644.1	5.5	0.130654	7.5	0.279648	0	0	P13533	0	#DIV/0!	2.14038	#DIV/0!	1.09787
XM_003513041.1	0	0	1	0.204781	0	0	O60218	4e-142	#DIV/0!	#DIV/0!	#DIV/0!	#DIV/0!
XM_003498202.1	1	0.119646	2	0.375597	0	0	Q13253	2e-47	#DIV/0!	3.13922	#DIV/0!	1.65041
XM_003513292.1	5	0.28962	2	0.181837	0	0	P22309	0	#DIV/0!	0.627845	#DIV/0!	-0.67152
XM_003499548.1	0	0	1	0.0907912	0	0	P22888	0	#DIV/0!	#DIV/0!	#DIV/0!	#DIV/0!
XM_003505205.1	1	0.122723	1	0.192628	0	0	Q8NH69	3e-142	#DIV/0!	1.56961	#DIV/0!	0.650408
XM_003501002.1	1	0.0781811	0.5	0.061357	0	0	Q86VH5	0	#DIV/0!	0.784806	#DIV/0!	-0.349592
XM_003510776.1	0	0	1	0.139006	0	0	Q15761	0	#DIV/0!	#DIV/0!	#DIV/0!	#DIV/0!
XM_003501294.1	1.5	0.136946	0.5	0.0716509	0	0	Q8WXI3	2e-170	#DIV/0!	0.523204	#DIV/0!	-0.934555
XM_003502983.1	4	0.279445	2	0.21931	0	0	P12821	9e-166	#DIV/0!	0.784806	#DIV/0!	-0.349592
XM_003507215.1	2	0.347545	3	0.818265	0	0	O43248	4e-39	#DIV/0!	2.35442	#DIV/0!	1.23537
XM_003506258.1	2.33333	0.169004	0.666667	0.0757918	0	0	P32243	6e-138	#DIV/0!	0.448461	#DIV/0!	-1.15695
XM_003515475.1	0.0526316	0.00527052	0.0526316	0.00827268	0	0	Q8NFZ6	5e-66	#DIV/0!	1.56961	#DIV/0!	0.650408
XM_003501477.1	1	0.0783292	4	0.491786	0	0	Q13087	0	#DIV/0!	6.27845	#DIV/0!	2.65041
XM_003515246.1	0.142857	0.00704202	0.142857	0.0110532	0	0	O75022	2e-83	#DIV/0!	1.56961	#DIV/0!	0.650408
XM_003496994.1	1	0.113933	2	0.357662	0	0	Q5JXM2	1e-156	#DIV/0!	3.13922	#DIV/0!	1.65041
XM_003513679.1	1	0.0820591	3	0.386403	0	0	A5D8T8	0	#DIV/0!	4.70884	#DIV/0!	2.23537
XM_003497463.1	8	0.244902	4	0.1922	0	0	Q6ZVL6	0	#DIV/0!	0.784806	#DIV/0!	-0.349592
XM_003506026.1	2	0.252182	2	0.395827	0	0	Q96RB7	7e-108	#DIV/0!	1.56961	#DIV/0!	0.650408
XM_003515745.1	5.5	0.60283	2.5	0.430095	0	0	P41180	3e-71	#DIV/0!	0.71346	#DIV/0!	-0.487096
XM_003506786.1	1	0.0343789	3	0.161885	0	0	P80192	0	#DIV/0!	4.70884	#DIV/0!	2.23537
XM_003497870.1	0	0	1	0.288514	0	0	Q5BVD1	1e-78	#DIV/0!	#DIV/0!	#DIV/0!	#DIV/0!
XM_003502979.1	1	0.0955146	2	0.299842	0	0	Q8N7B9	1e-173	#DIV/0!	3.13922	#DIV/0!	1.65041
XM_003510625.1	3.5	0.310627	2.5	0.34826	0	0	P13762	4e-90	#DIV/0!	1.12115	#DIV/0!	0.164981
XM_003508118.1	0	0	2	0.503873	0	0	Q8N987	4e-47	#DIV/0!	#DIV/0!	#DIV/0!	#DIV/0!
XM_003501686.1	4	0.135488	1	0.053166	0	0	Q8TE57	0	#DIV/0!	0.392403	#DIV/0!	-1.34959
XM_003515350.1	1	0.145626	1	0.228576	0	0		NA	#DIV/0!	1.56961	#DIV/0!	0.650408
XM_003507929.1	1	0.151865	1	0.238369	0	0	Q9NRF8	1e-73	#DIV/0!	1.56961	#DIV/0!	0.650408
XM_003497480.1	5.66667	0.728583	0.916667	0.184993	0	0	Q9BVA1	3e-127	#DIV/0!	0.253908	#DIV/0!	-1.97762
XM_003514901.1	1	0.0479789	1	0.0753082	0	0	Q8N4X5	0	#DIV/0!	1.56961	#DIV/0!	0.650408
XM_003509696.1	0	0	2	0.329521	0	0	Q6PEW1	3e-147	#DIV/0!	#DIV/0!	#DIV/0!	#DIV/0!
XM_003500659.1	0.5	0.0149127	0.5	0.0234071	0	0	Q9C0A0	0	#DIV/0!	1.56961	#DIV/0!	0.650408
XM_003505793.1	3	0.135402	1	0.0708429	0	0	Q14435	0	#DIV/0!	0.523204	#DIV/0!	-0.934555
XM_003495989.1	2	0.0793816	3	0.186897	0	0	P20849	0	#DIV/0!	2.35442	#DIV/0!	1.23537
XM_003501595.1	11	7.33767	5	5.23514	0	0	Q9Y5L5	6e-21	#DIV/0!	0.71346	#DIV/0!	-0.487096
XM_003510006.1	0	0	1	0.662405	0	0	P19876	4e-24	#DIV/0!	#DIV/0!	#DIV/0!	#DIV/0!
XM_003512968.1	1	0.0881829	2	0.276826	0	0	Q5JR12	0	#DIV/0!	3.13922	#DIV/0!	1.65041
XM_003502671.1	1	0.113829	1	0.178667	0	0	Q5JT82	3e-90	#DIV/0!	1.56961	#DIV/0!	0.650408
XM_003511513.1	1	0.0242568	1	0.0380737	0	0	O14514	0	#DIV/0!	1.56961	#DIV/0!	0.650408
XM_003515994.1	0.333333	0.0445186	1	0.209631	0	0	Q8NHA4	2e-126	#DIV/0!	4.70884	#DIV/0!	2.23537
XM_003501116.1	0	0	1	0.17834	0	0	Q9NUU6	9e-176	#DIV/0!	#DIV/0!	#DIV/0!	#DIV/0!
XM_003503162.1	0	0	1	0.138413	0	0	Q15842	0	#DIV/0!	#DIV/0!	#DIV/0!	#DIV/0!
XM_003495757.1	2	0.093995	1	0.0737678	0	0	Q8WXI4	0	#DIV/0!	0.784806	#DIV/0!	-0.349592
XM_003499857.1	4	0.185115	1	0.0726397	0	0	Q6YBV0	0	#DIV/0!	0.392403	#DIV/0!	-1.34959
XM_003515062.1	1	0.121641	3	0.572786	0	0	Q8NGV7	1e-138	#DIV/0!	4.70884	#DIV/0!	2.23537
XM_003496702.1	3	0.343694	2	0.359644	0	0	P61550	9e-40	#DIV/0!	1.04641	#DIV/0!	0.0654453
XM_003514682.1	0	0	1	0.205429	0	0	Q9UGF6	1e-87	#DIV/0!	#DIV/0!	#DIV/0!	#DIV/0!
XM_003496153.1	8	0.799185	6	0.940807	0	0	O60496	8e-173	#DIV/0!	1.17721	#DIV/0!	0.23537
XM_003507954.1	1	0.158459	1	0.248719	0	0	P78367	1e-75	#DIV/0!	1.56961	#DIV/0!	0.650408
XM_003506577.1	0	0	2	0.237786	0	0	P49758	0	#DIV/0!	#DIV/0!	#DIV/0!	#DIV/0!
XM_003497766.1	0.5	0.0338628	0.5	0.0531515	0	0	Q9NQ79	0	#DIV/0!	1.56961	#DIV/0!	0.650408
XM_003510582.1	1	0.0369927	1	0.0580641	0	0	Q8IYW2	0	#DIV/0!	1.56961	#DIV/0!	0.650408
XM_003515393.1	0	0	1	0.18798	0	0	Q8NGV7	1e-129	#DIV/0!	#DIV/0!	#DIV/0!	#DIV/0!
XM_003507374.1	4	0.173347	1	0.068022	0	0	Q9HBT6	0	#DIV/0!	0.392403	#DIV/0!	-1.34959
XM_003499877.1	0.5	0.0980043	1.25	0.384572	0	0	Q15014	9e-53	#DIV/0!	3.92403	#DIV/0!	1.97234
XM_003512889.1	2	0.252953	1	0.198519	0	0	Q8NH57	2e-170	#DIV/0!	0.784806	#DIV/0!	-0.349592
XM_003500860.1	3	0.177248	3	0.27821	0	0	P25067	1e-32	#DIV/0!	1.56961	#DIV/0!	0.650408
XM_003503813.1	6	0.408809	2	0.21389	0	0	Q8NEP4	2e-120	#DIV/0!	0.523204	#DIV/0!	-0.934555
XM_003503570.1	0	0	1	0.364695	0	0	P14770	8e-65	#DIV/0!	#DIV/0!	#DIV/0!	#DIV/0!
XM_003500162.1	0	0	1	0.205429	0	0	Q7Z5H5	1e-27	#DIV/0!	#DIV/0!	#DIV/0!	#DIV/0!
XM_003500526.1	1	0.159068	0.5	0.124838	0	0	P25942	2e-81	#DIV/0!	0.784806	#DIV/0!	-0.349592
XM_003503545.1	0	0	3	0.213305	0	0	Q92854	0	#DIV/0!	#DIV/0!	#DIV/0!	#DIV/0!
XM_003513982.1	0	0	1	0.104422	0	0	Q9BTD8	3e-24	#DIV/0!	#DIV/0!	#DIV/0!	#DIV/0!
XM_003500105.1	2	0.0882771	4	0.277121	0	0	O75899	0	#DIV/0!	3.13922	#DIV/0!	1.65041
XM_003509695.1	0	0	2	0.106332	0	0	O95239	0	#DIV/0!	#DIV/0!	#DIV/0!	#DIV/0!
XM_003512417.1	4	0.29074	2	0.228175	0	0	Q9BXC0	5e-164	#DIV/0!	0.784806	#DIV/0!	-0.349592
XM_003500678.1	1	0.0743845	1	0.116755	0	0	P32241	0	#DIV/0!	1.56961	#DIV/0!	0.650408
XM_003515492.1	0	0	0.333333	0.0684765	0	0	Q8NH02	1e-137	#DIV/0!	#DIV/0!	#DIV/0!	#DIV/0!
XM_003497413.1	0	0	0.833333	0.119155	0	0	Q8NDH6	0	#DIV/0!	#DIV/0!	#DIV/0!	#DIV/0!
XM_003497470.1	10.6667	0.846195	1.91667	0.238661	0	0	Q9BVA1	0	#DIV/0!	0.28204	#DIV/0!	-1.82603
XM_003511516.1	0	0	1	0.519326	0	0	O43653	5e-40	#DIV/0!	#DIV/0!	#DIV/0!	#DIV/0!
XM_003514112.1	0.5	0.0396401	1	0.124439	0	0		NA	#DIV/0!	3.13922	#DIV/0!	1.65041
XM_003505643.1	4	0.0402509	3	0.0473837	0	0	Q9C0G6	0	#DIV/0!	1.17721	#DIV/0!	0.23537
XM_003513791.1	0	0	1	0.200977	0	0	Q8NH55	1e-158	#DIV/0!	#DIV/0!	#DIV/0!	#DIV/0!
XM_003507768.1	6	2.10294	1	0.550133	0	0		NA	#DIV/0!	0.261602	#DIV/0!	-1.93455
XM_003504136.1	1	0.0572823	1	0.0899109	0	0	Q7Z6P3	0	#DIV/0!	1.56961	#DIV/0!	0.650408
XM_003509120.1	3	0.23148	2	0.242223	0	0	Q9HCC8	0	#DIV/0!	1.04641	#DIV/0!	0.0654453
XM_003510200.1	0	0	1	0.0803081	0	0	Q9BQG1	0	#DIV/0!	#DIV/0!	#DIV/0!	#DIV/0!
XM_003505737.1	0	0	1	0.0899109	0	0	A8MT70	0	#DIV/0!	#DIV/0!	#DIV/0!	#DIV/0!
XM_003502934.1	6	0.123826	1	0.0323931	0	0	P48681	8e-146	#DIV/0!	0.261602	#DIV/0!	-1.93455
XM_003503921.1	0	0	0.333333	0.0483004	0	0	P41586	0	#DIV/0!	#DIV/0!	#DIV/0!	#DIV/0!
XM_003504299.1	28	4.36988	10	2.44965	0	0	P40313	2e-128	#DIV/0!	0.560576	#DIV/0!	-0.835019
XM_003500698.1	0	0	2	0.303344	0	0	P25101	0	#DIV/0!	#DIV/0!	#DIV/0!	#DIV/0!
XM_003501409.1	3.16667	0.0554316	0.333333	0.00915853	0	0	Q9UL68	2e-47	#DIV/0!	0.165222	#DIV/0!	-2.59752
XM_003510450.1	0	0	1	0.0625392	0	0	A8MWY0	0	#DIV/0!	#DIV/0!	#DIV/0!	#DIV/0!
XM_003512743.1	1	0.136946	2.5	0.537382	0	0	Q7L4S7	9e-110	#DIV/0!	3.92403	#DIV/0!	1.97234
XM_003504013.1	4	0.93464	6	2.20053	0	0	Q96LZ3	2e-78	#DIV/0!	2.35442	#DIV/0!	1.23537
XM_003497245.1	1	0.117828	2	0.36989	0	0	Q8N9M5	1e-111	#DIV/0!	3.13922	#DIV/0!	1.65041
XM_003504164.1	2	0.156067	2	0.244965	0	0	Q6PF05	3e-116	#DIV/0!	1.56961	#DIV/0!	0.650408
XM_003515563.1	2	0.16744	2	0.262817	0	0	Q8TD84	5e-26	#DIV/0!	1.56961	#DIV/0!	0.650408
XM_003497347.1	0.5	0.0405469	1	0.127286	0	0	Q02928	0	#DIV/0!	3.13922	#DIV/0!	1.65041
XM_003513271.1	0	0	1	0.321365	0	0	Q9Y581	5e-40	#DIV/0!	#DIV/0!	#DIV/0!	#DIV/0!
XM_003495516.1	0.4	0.0179621	0.2	0.0140968	0	0	P39086	0	#DIV/0!	0.784806	#DIV/0!	-0.349592
XM_003511313.1	1	0.0473743	1	0.0743593	0	0	O95206	8e-102	#DIV/0!	1.56961	#DIV/0!	0.650408
XM_003505780.1	0	0	1	0.284718	0	0	A4QMS7	1e-58	#DIV/0!	#DIV/0!	#DIV/0!	#DIV/0!
XM_003507601.1	0	0	1	0.15493	0	0	Q9GZT5	0	#DIV/0!	#DIV/0!	#DIV/0!	#DIV/0!
XM_003511550.1	0	0	1	0.194942	0	0	Q6PIV2	5e-108	#DIV/0!	#DIV/0!	#DIV/0!	#DIV/0!
XM_003499245.1	0.25	0.0330334	0.25	0.0518496	0	0	Q6IFH4	3e-143	#DIV/0!	1.56961	#DIV/0!	0.650408
XM_003511682.1	4	0.0937287	5	0.183897	0	0	Q96L96	0	#DIV/0!	1.96201	#DIV/0!	0.972336
XM_003495679.1	0	0	2	0.293736	0	0	Q9NQ84	0	#DIV/0!	#DIV/0!	#DIV/0!	#DIV/0!
XM_003510097.1	1	0.070098	1	0.110027	0	0	Q08881	0	#DIV/0!	1.56961	#DIV/0!	0.650408
XM_003499083.1	0.5	0.109994	1.5	0.517944	0	0	Q96Q77	1e-103	#DIV/0!	4.70884	#DIV/0!	2.23537
XM_003495988.1	0	0	1	0.0571944	0	0	Q14993	1e-20	#DIV/0!	#DIV/0!	#DIV/0!	#DIV/0!
XM_003504969.1	0	0	1	0.242223	0	0	O95755	1e-126	#DIV/0!	#DIV/0!	#DIV/0!	#DIV/0!
XM_003516119.1	0	0	1	0.283475	0	0	Q7Z4J2	3e-67	#DIV/0!	#DIV/0!	#DIV/0!	#DIV/0!
XM_003513786.1	0	0	2	0.621203	0	0		NA	#DIV/0!	#DIV/0!	#DIV/0!	#DIV/0!
XM_003511939.1	3	0.101561	1	0.053137	0	0	Q6ZT07	0	#DIV/0!	0.523204	#DIV/0!	-0.934555
XM_003504637.1	7	0.644298	1	0.144471	0	0	P09543	0	#DIV/0!	0.22423	#DIV/0!	-2.15695
XM_003496140.1	1	0.0445666	1	0.0699523	0	0	P06401	0	#DIV/0!	1.56961	#DIV/0!	0.650408
XM_003512979.1	10	1.57854	4	0.991079	0	0		NA	#DIV/0!	0.627845	#DIV/0!	-0.67152
XM_003514571.1	0	0	1	0.186361	0	0	Q32ZL2	3e-134	#DIV/0!	#DIV/0!	#DIV/0!	#DIV/0!
XM_003509387.1	1	0.0332726	1	0.052225	0	0	Q6ZQQ2	3e-23	#DIV/0!	1.56961	#DIV/0!	0.650408
XM_003501540.1	0	0	2	0.484445	0	0	Q96QI5	3e-136	#DIV/0!	#DIV/0!	#DIV/0!	#DIV/0!
XM_003500063.1	1	0.390168	1	0.612412	0	0	Q9BQ08	1e-35	#DIV/0!	1.56961	#DIV/0!	0.650408
XM_003514633.1	0	0	1	0.184945	0	0	P25090	1e-151	#DIV/0!	#DIV/0!	#DIV/0!	#DIV/0!
XM_003506259.1	2.33333	0.147031	0.666667	0.0659377	0	0	P32243	7e-138	#DIV/0!	0.448461	#DIV/0!	-1.15695
XM_003515141.1	1	0.326509	1	0.512492	0	0	Q14210	7e-29	#DIV/0!	1.56961	#DIV/0!	0.650408
XM_003501411.1	1.66667	0.0359696	0.333333	0.0112916	0	0	Q9UL68	2e-47	#DIV/0!	0.313922	#DIV/0!	-1.67152
XM_003513509.1	0	0	3	1.40106	0	0	P23083	1e-39	#DIV/0!	#DIV/0!	#DIV/0!	#DIV/0!
XM_003507991.1	32	1.99015	9	0.878558	0	0	Q9Y6X4	0	#DIV/0!	0.441453	#DIV/0!	-1.17967
XM_003496597.1	2	0.132557	1	0.104032	0	0	Q14397	0	#DIV/0!	0.784806	#DIV/0!	-0.349592
XM_003499218.1	9	0.353485	5	0.308242	0	0	P25092	0	#DIV/0!	0.872007	#DIV/0!	-0.197589
XM_003506317.1	3	0.298253	4	0.624189	0	0	Q6NXR0	1e-54	#DIV/0!	2.09282	#DIV/0!	1.06545
XM_003508161.1	0	0	1	0.152743	0	0	Q8N3G9	0	#DIV/0!	#DIV/0!	#DIV/0!	#DIV/0!
XM_003514461.1	0	0	0.5	0.100489	0	0	Q8NGE5	3e-69	#DIV/0!	#DIV/0!	#DIV/0!	#DIV/0!
XM_003509619.1	2	0.235657	1	0.184945	0	0	P40225	9e-93	#DIV/0!	0.784806	#DIV/0!	-0.349592
XM_003503164.1	0	0	1	0.0918185	0	0	P54840	0	#DIV/0!	#DIV/0!	#DIV/0!	#DIV/0!
XM_003511715.1	0	0	1	0.202862	0	0	Q8NGF6	5e-141	#DIV/0!	#DIV/0!	#DIV/0!	#DIV/0!
XM_003504943.1	10	1.08266	4	0.679746	0	0	P38405	0	#DIV/0!	0.627845	#DIV/0!	-0.67152
XM_003503706.1	0	0	1	0.196714	0	0	Q5TGI0	0	#DIV/0!	#DIV/0!	#DIV/0!	#DIV/0!
XM_003508156.1	2	0.382943	0.333333	0.100179	0	0	P02794	3e-56	#DIV/0!	0.261602	#DIV/0!	-1.93455
XM_003515556.1	2	0.162082	2	0.254405	0	0	Q16799	8e-173	#DIV/0!	1.56961	#DIV/0!	0.650408
XM_003503439.1	3	0.473563	2	0.49554	0	0	Q8NE22	3e-70	#DIV/0!	1.04641	#DIV/0!	0.0654453
XM_003495117.1	1	0.0817348	1	0.128292	0	0	Q8TDN1	0	#DIV/0!	1.56961	#DIV/0!	0.650408
XM_003516181.1	6	1.88944	0.333333	0.164761	0	0		NA	#DIV/0!	0.0872007	#DIV/0!	-3.51952
XM_003506334.1	11	0.446892	1	0.0637679	0	0	A6NNT2	2e-83	#DIV/0!	0.142692	#DIV/0!	-2.80902
XM_003514384.1	3	0.209583	1.66667	0.182758	0	0	Q9BY79	0	#DIV/0!	0.872007	#DIV/0!	-0.197589
XM_003502867.1	3	0.115203	2	0.120549	0	0	A5PLK6	0	#DIV/0!	1.04641	#DIV/0!	0.0654453
XM_003509225.1	1	0.0262923	0.666667	0.0275125	0	0	P01023	7e-65	#DIV/0!	1.04641	#DIV/0!	0.0654453
XM_003508203.1	1	0.0453485	2	0.142359	0	0	Q9Y5G9	0	#DIV/0!	3.13922	#DIV/0!	1.65041
XM_003500707.1	3	0.342744	3	0.537975	0	0	Q5NUL3	2e-161	#DIV/0!	1.56961	#DIV/0!	0.650408
XM_003496658.1	1	0.145626	2	0.457153	0	0	P52945	2e-122	#DIV/0!	3.13922	#DIV/0!	1.65041
XM_003503190.1	4	0.113698	2	0.0892312	0	0	Q7Z7B0	0	#DIV/0!	0.784806	#DIV/0!	-0.349592
XM_003515114.1	0	0	1	0.194358	0	0	Q15622	2e-122	#DIV/0!	#DIV/0!	#DIV/0!	#DIV/0!
XM_003496324.1	1	0.272091	1	0.427077	0	0	A6NJT0	1e-47	#DIV/0!	1.56961	#DIV/0!	0.650408
XM_003497740.1	0	0	1	0.131942	0	0	Q14541	0	#DIV/0!	#DIV/0!	#DIV/0!	#DIV/0!
XM_003498575.1	1	0.0413992	1	0.0649807	0	0	O95259	0	#DIV/0!	1.56961	#DIV/0!	0.650408
XM_003513207.1	1	0.166096	0.5	0.130353	0	0		NA	#DIV/0!	0.784806	#DIV/0!	-0.349592
XM_003503456.1	0	0	0.2	0.021249	0	0	P49796	0	#DIV/0!	#DIV/0!	#DIV/0!	#DIV/0!
XM_003504236.1	1	0.258486	3	1.21717	0	0	A2RUT3	1e-42	#DIV/0!	4.70884	#DIV/0!	2.23537
XM_003505402.1	1	0.127779	1	0.200563	0	0	Q8NGB2	3e-137	#DIV/0!	1.56961	#DIV/0!	0.650408
XM_003505470.1	9	0.684228	6	0.715982	0	0	Q2M3D2	6e-147	#DIV/0!	1.04641	#DIV/0!	0.0654453
XM_003507372.1	1	0.0131336	2	0.0412294	0	0	Q5SZK8	0	#DIV/0!	3.13922	#DIV/0!	1.65041
XM_003512507.1	3	0.259026	1	0.135523	0	0	Q5VWM5	1e-82	#DIV/0!	0.523204	#DIV/0!	-0.934555
XM_003503537.1	1	0.106592	1	0.167308	0	0	Q9NZU7	5e-74	#DIV/0!	1.56961	#DIV/0!	0.650408
XM_003511978.1	16	0.394745	7	0.271074	0	0	Q8TD84	0	#DIV/0!	0.686705	#DIV/0!	-0.542237
XM_003507571.1	0.5	0.0380127	3	0.357991	0	0	Q4VX76	2e-80	#DIV/0!	9.41767	#DIV/0!	3.23537
XM_003503365.1	1	0.131295	1	0.206082	0	0	Q8NG77	1e-109	#DIV/0!	1.56961	#DIV/0!	0.650408
XM_003500572.1	1.14286	0.154464	0.333333	0.0707143	0	0		NA	#DIV/0!	0.457803	#DIV/0!	-1.1272
XM_003498800.1	1.5	0.157454	0.333333	0.0549202	0	0	Q9BQ16	0	#DIV/0!	0.348803	#DIV/0!	-1.51952
XM_003512418.1	2	0.119187	2	0.187077	0	0	Q6P9F0	0	#DIV/0!	1.56961	#DIV/0!	0.650408
XM_003508706.1	0	0	0.5	0.101749	0	0	O43749	2e-102	#DIV/0!	#DIV/0!	#DIV/0!	#DIV/0!
XM_003514569.1	1	0.0615443	1	0.0966007	0	0	Q92824	2e-24	#DIV/0!	1.56961	#DIV/0!	0.650408
XM_003507521.1	3	0.427839	3	0.671542	0	0	O95158	2e-80	#DIV/0!	1.56961	#DIV/0!	0.650408
XM_003496034.1	1	0.0778866	2	0.244504	0	0	P17658	0	#DIV/0!	3.13922	#DIV/0!	1.65041
XM_003500916.1	0	0	1	0.047029	0	0	Q9C0B6	0	#DIV/0!	#DIV/0!	#DIV/0!	#DIV/0!
XM_003514622.1	0	0	2	1.96714	0	0		NA	#DIV/0!	#DIV/0!	#DIV/0!	#DIV/0!
XM_003510208.1	3	0.0829922	2	0.0868437	0	0	Q9Y566	2e-58	#DIV/0!	1.04641	#DIV/0!	0.0654453
XM_003511851.1	0	0	0.5	0.104032	0	0	Q8NGJ3	1e-142	#DIV/0!	#DIV/0!	#DIV/0!	#DIV/0!
XM_003513690.1	1	0.143603	2	0.450803	0	0	Q9H1V8	9e-151	#DIV/0!	3.13922	#DIV/0!	1.65041
XM_003497733.1	2	0.126091	2	0.197914	0	0	P04003	0	#DIV/0!	1.56961	#DIV/0!	0.650408
XM_003511803.1	1	0.0165321	2	0.051898	0	0	Q14CM0	0	#DIV/0!	3.13922	#DIV/0!	1.65041
XM_003511904.1	3	0.319777	1	0.167308	0	0	Q16585	8e-165	#DIV/0!	0.523204	#DIV/0!	-0.934555
XM_003500604.1	0	0	1	0.153103	0	0	Q9UJW3	1e-142	#DIV/0!	#DIV/0!	#DIV/0!	#DIV/0!
XM_003514458.1	1	0.132134	2	0.414797	0	0	O95007	2e-83	#DIV/0!	3.13922	#DIV/0!	1.65041
XM_003507770.1	0	0	1	0.146426	0	0	Q9H161	8e-129	#DIV/0!	#DIV/0!	#DIV/0!	#DIV/0!
XM_003513080.1	1	0.0762122	1	0.119624	0	0	Q92753	0	#DIV/0!	1.56961	#DIV/0!	0.650408
XM_003503355.1	1	0.11362	0.333333	0.0594466	0	0	Q8N972	5e-102	#DIV/0!	0.523204	#DIV/0!	-0.934555
XM_003506320.1	0	0	1	0.515204	0	0	P47902	6e-44	#DIV/0!	#DIV/0!	#DIV/0!	#DIV/0!
XM_003501858.1	16	5.85597	10	5.74475	0	0	Q2M2W7	1e-38	#DIV/0!	0.981007	#DIV/0!	-0.0276641
XM_003496831.1	0	0	2	0.154745	0	0	Q9NRI5	0	#DIV/0!	#DIV/0!	#DIV/0!	#DIV/0!
XM_003496241.1	3	0.116428	1	0.0609156	0	0	P49418	0	#DIV/0!	0.523204	#DIV/0!	-0.934555
XM_003512116.1	1	0.0765885	1	0.120214	0	0	Q6PF04	1e-172	#DIV/0!	1.56961	#DIV/0!	0.650408
XM_003508029.1	0	0	0.5	0.0328189	0	0	Q8IWY4	0	#DIV/0!	#DIV/0!	#DIV/0!	#DIV/0!
XM_003506755.1	2	0.109364	2	0.171659	0	0	Q9Y5Q3	5e-125	#DIV/0!	1.56961	#DIV/0!	0.650408
XM_003514491.1	1	0.0874372	1	0.137242	0	0	Q5TYX0	8e-80	#DIV/0!	1.56961	#DIV/0!	0.650408
XM_003512471.1	0	0	1	0.214243	0	0	Q8NH37	2e-129	#DIV/0!	#DIV/0!	#DIV/0!	#DIV/0!
XM_003509277.1	25	3.40113	4	0.854154	0	0	P61550	6e-23	#DIV/0!	0.251138	#DIV/0!	-1.99345
XM_003508903.1	0	0	1	0.0785904	0	0	Q17R60	0	#DIV/0!	#DIV/0!	#DIV/0!	#DIV/0!
XM_003501516.1	7	0.476159	4	0.427077	0	0	P0CG20	2e-167	#DIV/0!	0.896921	#DIV/0!	-0.156947
XM_003500578.1	1.14286	0.196942	0.333333	0.0901607	0	0		NA	#DIV/0!	0.457803	#DIV/0!	-1.1272
XM_003506744.1	0	0	1	0.0928694	0	0	Q8IZF3	0	#DIV/0!	#DIV/0!	#DIV/0!	#DIV/0!
XM_003514995.1	0.892857	0.0512158	0.642857	0.0578801	0	0	Q6PI73	7e-73	#DIV/0!	1.13012	#DIV/0!	0.176477
XM_003496707.1	0	0	1	0.554835	0	0		NA	#DIV/0!	#DIV/0!	#DIV/0!	#DIV/0!
XM_003513227.1	6	0.505391	3	0.396634	0	0	Q7Z7H3	2e-139	#DIV/0!	0.784806	#DIV/0!	-0.349592
XM_003499977.1	0	0	1	0.366755	0	0	Q5W188	2e-25	#DIV/0!	#DIV/0!	#DIV/0!	#DIV/0!
XM_003513024.1	0	0	2	0.412163	0	0	Q13606	4e-88	#DIV/0!	#DIV/0!	#DIV/0!	#DIV/0!
XM_003495370.1	14	1.76527	10	1.97914	0	0	Q96P67	7e-148	#DIV/0!	1.12115	#DIV/0!	0.164981
XM_003509631.1	0	0	1	0.206082	0	0	Q7Z5H5	4e-69	#DIV/0!	#DIV/0!	#DIV/0!	#DIV/0!
XM_003497475.1	0	0	2	0.265504	0	0	Q8IXS0	5e-136	#DIV/0!	#DIV/0!	#DIV/0!	#DIV/0!
XM_003503035.1	8	0.961809	2	0.377417	0	0	Q9NYW6	5e-102	#DIV/0!	0.392403	#DIV/0!	-1.34959
XM_003502992.1	0	0	1	0.287238	0	0	Q9H898	9e-116	#DIV/0!	#DIV/0!	#DIV/0!	#DIV/0!
XM_003515675.1	35	2.90085	10.5	1.36596	0	0	P16233	0	#DIV/0!	0.470884	#DIV/0!	-1.08656
XM_003495073.1	1	0.0610898	1	0.0958873	0	0	Q8WWL2	0	#DIV/0!	1.56961	#DIV/0!	0.650408
XM_003511248.1	1	0.0361836	0.5	0.0283971	0	0	O75022	5e-55	#DIV/0!	0.784806	#DIV/0!	-0.349592
XM_003495234.1	1	0.23633	0.5	0.185473	0	0	P78369	1e-59	#DIV/0!	0.784806	#DIV/0!	-0.349592
XM_003514505.1	1	0.228496	2	0.717301	0	0	A8MZH6	7e-32	#DIV/0!	3.13922	#DIV/0!	1.65041
XM_003513692.1	3	0.174016	1	0.0910459	0	0	O95076	1e-116	#DIV/0!	0.523204	#DIV/0!	-0.934555
XM_003511911.1	5	0.461583	0.5	0.0724506	0	0	Q6NXR0	2e-58	#DIV/0!	0.156961	#DIV/0!	-2.67152
XM_003506617.1	1.33333	0.0498137	1	0.0586411	0	0	Q9Y2J2	0	#DIV/0!	1.17721	#DIV/0!	0.23537
XM_003507790.1	3	0.207596	3	0.325846	0	0	Q12765	0	#DIV/0!	1.56961	#DIV/0!	0.650408
XM_003515594.1	4	0.101867	1	0.0399727	0	0	P12111	2e-48	#DIV/0!	0.392403	#DIV/0!	-1.34959
XM_003500043.1	1	0.103914	1	0.163105	0	0	P19622	5e-42	#DIV/0!	1.56961	#DIV/0!	0.650408
XM_003509763.1	4	1.10287	1	0.432771	0	0	Q8N111	4e-33	#DIV/0!	0.392403	#DIV/0!	-1.34959
XM_003514200.1	1	0.0521536	1	0.0818609	0	0	P32927	0	#DIV/0!	1.56961	#DIV/0!	0.650408
XM_003500566.1	0.333333	0.0604646	0.333333	0.094906	0	0		NA	#DIV/0!	1.56961	#DIV/0!	0.650408
XM_003503620.1	1	0.107984	1	0.169493	0	0	P78423	7e-102	#DIV/0!	1.56961	#DIV/0!	0.650408
XM_003508429.1	4	0.507458	1	0.199128	0	0	Q99608	3e-131	#DIV/0!	0.392403	#DIV/0!	-1.34959
XM_003501047.1	0	0	1	0.206738	0	0	O15466	3e-34	#DIV/0!	#DIV/0!	#DIV/0!	#DIV/0!
XM_003495232.1	1	0.213185	0.5	0.167308	0	0	P78369	2e-64	#DIV/0!	0.784806	#DIV/0!	-0.349592
XM_003512353.1	3	0.212333	1	0.111094	0	0	P41146	3e-164	#DIV/0!	0.523204	#DIV/0!	-0.934555
XM_003506044.1	0	0	1	0.321365	0	0	Q9UMX6	1e-102	#DIV/0!	#DIV/0!	#DIV/0!	#DIV/0!
XM_003497267.1	2	0.298612	2	0.468705	0	0		NA	#DIV/0!	1.56961	#DIV/0!	0.650408
XM_003509167.1	1	0.204068	1	0.320308	0	0	O75129	6e-97	#DIV/0!	1.56961	#DIV/0!	0.650408
XM_003508570.1	1	0.0316191	1	0.0496297	0	0	Q8N6C5	0	#DIV/0!	1.56961	#DIV/0!	0.650408
XM_003497327.1	4	0.190589	1	0.0747877	0	0	Q5U5Z8	0	#DIV/0!	0.392403	#DIV/0!	-1.34959
XM_003495027.1	1.5	0.147356	0.5	0.077097	0	0	Q8WXU2	6e-171	#DIV/0!	0.523204	#DIV/0!	-0.934555
XM_003505655.1	0	0	1	0.163516	0	0	Q00266	0	#DIV/0!	#DIV/0!	#DIV/0!	#DIV/0!
XM_003500115.1	16	1.06501	4	0.417912	0	0	Q969G2	0	#DIV/0!	0.392403	#DIV/0!	-1.34959
XM_003495615.1	1	0.165431	3	0.778988	0	0	Q96DX8	3e-51	#DIV/0!	4.70884	#DIV/0!	2.23537
XM_003514920.1	0	0	0.5	0.122482	0	0	Q9UHF1	8e-114	#DIV/0!	#DIV/0!	#DIV/0!	#DIV/0!
XM_003515794.1	0	0	0.333333	0.0442506	0	0	Q13316	1e-34	#DIV/0!	#DIV/0!	#DIV/0!	#DIV/0!
XM_003500074.1	1	0.112999	1	0.177365	0	0	Q7L190	4e-57	#DIV/0!	1.56961	#DIV/0!	0.650408
XM_003513588.1	1	0.0842318	0.333333	0.0440704	0	0	P33260	0	#DIV/0!	0.523204	#DIV/0!	-0.934555
XM_003508812.1	3	0.114459	8	0.479083	0	0	Q5VUJ6	0	#DIV/0!	4.18563	#DIV/0!	2.06545
XM_003502604.1	0	0	2	0.488088	0	0	P08246	2e-100	#DIV/0!	#DIV/0!	#DIV/0!	#DIV/0!
XM_003495442.1	2	0.0790025	2	0.124003	0	0	Q9P283	0	#DIV/0!	1.56961	#DIV/0!	0.650408
XM_003513549.1	0.5	0.0564997	0.5	0.0886826	0	0	Q8WZ94	7e-117	#DIV/0!	1.56961	#DIV/0!	0.650408
XM_003504825.1	0	0	1	0.245893	0	0	P01236	3e-24	#DIV/0!	#DIV/0!	#DIV/0!	#DIV/0!
XM_003507726.1	0	0	1	0.191492	0	0	P46094	9e-116	#DIV/0!	#DIV/0!	#DIV/0!	#DIV/0!
XM_003497548.1	3	0.354495	3	0.55642	0	0	O43316	3e-150	#DIV/0!	1.56961	#DIV/0!	0.650408
XM_003509890.1	24	2.74955	6	1.07893	0	0	P49685	2e-159	#DIV/0!	0.392403	#DIV/0!	-1.34959
XM_003499465.1	0	0	1	0.130878	0	0	Q9NY37	0	#DIV/0!	#DIV/0!	#DIV/0!	#DIV/0!
XM_003509168.1	0.142857	0.0189976	1	0.208732	0	0	P30953	2e-115	#DIV/0!	10.9873	#DIV/0!	3.45776
XM_003511807.1	1	0.0575213	1	0.0902861	0	0	A1L4K1	0	#DIV/0!	1.56961	#DIV/0!	0.650408
XM_003495879.1	1	0.177501	1	0.278608	0	0	Q8N699	3e-86	#DIV/0!	1.56961	#DIV/0!	0.650408
XM_003501255.1	0	0	1	0.636428	0	0	Q96LR9	3e-44	#DIV/0!	#DIV/0!	#DIV/0!	#DIV/0!
XM_003504069.1	27	2.18525	10	1.27037	0	0	Q7KZI7	5e-69	#DIV/0!	0.581338	#DIV/0!	-0.782552
XM_003514359.1	1	0.0421588	3	0.198519	0	0	O95522	4e-62	#DIV/0!	4.70884	#DIV/0!	2.23537
XM_003501444.1	1	0.0594506	1	0.0933144	0	0	Q969W9	5e-115	#DIV/0!	1.56961	#DIV/0!	0.650408
XM_003513379.1	0	0	2	0.413476	0	0	O95918	5e-102	#DIV/0!	#DIV/0!	#DIV/0!	#DIV/0!
XM_003515342.1	0	0	1	0.0934936	0	0	Q9UNQ0	8e-145	#DIV/0!	#DIV/0!	#DIV/0!	#DIV/0!
XM_003509122.1	2	0.0772802	1	0.06065	0	0	Q9ULH4	0	#DIV/0!	0.784806	#DIV/0!	-0.349592
XM_003494929.1	5	0.292075	3	0.275067	0	0	Q04759	0	#DIV/0!	0.941767	#DIV/0!	-0.0865577
XM_003511451.1	2.5	0.439977	1	0.276237	0	0	Q8TDM6	2e-26	#DIV/0!	0.627845	#DIV/0!	-0.67152
XM_003508095.1	0	0	1	0.268247	0	0	P30711	1e-101	#DIV/0!	#DIV/0!	#DIV/0!	#DIV/0!
XM_003503047.1	9	0.64734	1	0.112897	0	0	Q96P26	0	#DIV/0!	0.174401	#DIV/0!	-2.51952
XM_003509848.1	2	0.283273	1	0.222314	0	0	Q9NVL8	9e-93	#DIV/0!	0.784806	#DIV/0!	-0.349592
XM_003509013.1	0	0	1	0.161482	0	0	Q9UDX4	0	#DIV/0!	#DIV/0!	#DIV/0!	#DIV/0!
XM_003513129.1	3	0.46296	3	0.726668	0	0	Q6ZRR5	1e-138	#DIV/0!	1.56961	#DIV/0!	0.650408
XM_003502069.1	2	0.148236	1	0.116336	0	0	O95741	0	#DIV/0!	0.784806	#DIV/0!	-0.349592
XM_003514074.1	3	0.616259	3	0.967287	0	0	Q6JVE5	2e-49	#DIV/0!	1.56961	#DIV/0!	0.650408
XM_003502973.1	7	0.304742	5	0.341662	0	0	Q9H252	0	#DIV/0!	1.12115	#DIV/0!	0.164981
XM_003499247.1	0.25	0.0330334	0.25	0.0518496	0	0	Q6IFH4	6e-146	#DIV/0!	1.56961	#DIV/0!	0.650408
XM_003503913.1	2	0.395768	1	0.310601	0	0	P10966	1e-41	#DIV/0!	0.784806	#DIV/0!	-0.349592
XM_003494925.1	3	0.131017	1	0.0685488	0	0	P19823	0	#DIV/0!	0.523204	#DIV/0!	-0.934555
XM_003505209.1	0	0	0.5	0.100489	0	0	Q8NH19	1e-94	#DIV/0!	#DIV/0!	#DIV/0!	#DIV/0!
XM_003497177.1	0	0	1	0.139704	0	0	P04278	9e-137	#DIV/0!	#DIV/0!	#DIV/0!	#DIV/0!
XM_003510651.1	0	0	1	0.0595011	0	0	P16389	0	#DIV/0!	#DIV/0!	#DIV/0!	#DIV/0!
XM_003508431.1	0.5	0.176743	0.5	0.277418	0	0	A6NC42	1e-35	#DIV/0!	1.56961	#DIV/0!	0.650408
XM_003515080.1	2.25	0.0877878	1.33333	0.081655	0	0	Q9UJQ4	0	#DIV/0!	0.93014	#DIV/0!	-0.10448
XM_003495742.1	6	1.00059	1	0.261757	0	0	Q5T700	4e-87	#DIV/0!	0.261602	#DIV/0!	-1.93455
XM_003503061.1	1	0.0731134	1	0.11476	0	0	O15244	0	#DIV/0!	1.56961	#DIV/0!	0.650408
XM_003515956.1	1	0.174505	1	0.273906	0	0	Q8N4K4	8e-39	#DIV/0!	1.56961	#DIV/0!	0.650408
XM_003510235.1	17	3.00891	4	1.11125	0	0	P48788	9e-92	#DIV/0!	0.36932	#DIV/0!	-1.43705
XM_003507804.1	1	0.260112	2	0.81655	0	0		NA	#DIV/0!	3.13922	#DIV/0!	1.65041
XM_003513205.1	0	0	1	0.470404	0	0		NA	#DIV/0!	#DIV/0!	#DIV/0!	#DIV/0!
XM_003516126.1	0.333333	0.0428135	0.333333	0.0672005	0	0	Q8NGT9	2e-65	#DIV/0!	1.56961	#DIV/0!	0.650408
XM_003503123.1	0	0	1	0.226978	0	0	Q96CA5	1e-92	#DIV/0!	#DIV/0!	#DIV/0!	#DIV/0!
XM_003499834.1	0	0	1	0.175923	0	0	Q8IZU3	9e-48	#DIV/0!	#DIV/0!	#DIV/0!	#DIV/0!
XM_003505423.1	0	0	1	0.208063	0	0	Q8NGM1	4e-128	#DIV/0!	#DIV/0!	#DIV/0!	#DIV/0!
XM_003496771.1	4	0.472661	4	0.741894	0	0	Q9BZ19	4e-109	#DIV/0!	1.56961	#DIV/0!	0.650408
XM_003495464.1	1	0.0115439	3	0.0543581	0	0	Q9P273	0	#DIV/0!	4.70884	#DIV/0!	2.23537
XM_003501370.1	0.75	0.0740295	1	0.15493	0	0	P01011	2e-140	#DIV/0!	2.09282	#DIV/0!	1.06545
XM_003513519.1	2	0.10673	1	0.0837622	0	0	Q495T6	0	#DIV/0!	0.784806	#DIV/0!	-0.349592
XM_003497732.1	1	0.0687007	3	0.3235	0	0	P04003	2e-173	#DIV/0!	4.70884	#DIV/0!	2.23537
XM_003497122.1	0	0	1	0.25064	0	0	Q0VDE8	2e-26	#DIV/0!	#DIV/0!	#DIV/0!	#DIV/0!
XM_003501733.1	0	0	2	0.609537	0	0	P59190	4e-99	#DIV/0!	#DIV/0!	#DIV/0!	#DIV/0!
XM_003504826.1	0	0	1	0.283475	0	0	P01236	3e-35	#DIV/0!	#DIV/0!	#DIV/0!	#DIV/0!
XM_003511460.1	0	0	1.5	0.18212	0	0	Q6PI73	2e-42	#DIV/0!	#DIV/0!	#DIV/0!	#DIV/0!
XM_003505034.1	2	0.415656	1	0.32621	0	0		NA	#DIV/0!	0.784806	#DIV/0!	-0.349592
XM_003507949.1	1	0.268557	2	0.843061	0	0	P17600	1e-73	#DIV/0!	3.13922	#DIV/0!	1.65041
XM_003500254.1	2	0.310961	1	0.244044	0	0	P09326	7e-44	#DIV/0!	0.784806	#DIV/0!	-0.349592
XM_003514294.1	0	0	1	0.168175	0	0	Q6P5S2	1e-107	#DIV/0!	#DIV/0!	#DIV/0!	#DIV/0!
XM_003509002.1	0	0	1	0.0608395	0	0	Q14DG7	0	#DIV/0!	#DIV/0!	#DIV/0!	#DIV/0!
XM_003503397.1	1	0.00599562	1	0.0094108	0	0	Q5CZC0	0	#DIV/0!	1.56961	#DIV/0!	0.650408
XM_003499911.1	2	0.0422665	1	0.033171	0	0	Q8NFU7	0	#DIV/0!	0.784806	#DIV/0!	-0.349592
XM_003510041.1	0	0	0.5	0.0516845	0	0	Q9NP70	2e-112	#DIV/0!	#DIV/0!	#DIV/0!	#DIV/0!
XM_003515647.1	1	0.134716	1	0.211452	0	0		NA	#DIV/0!	1.56961	#DIV/0!	0.650408
XM_003499409.1	1	0.0387972	2	0.121793	0	0	P29122	0	#DIV/0!	3.13922	#DIV/0!	1.65041
XM_003507402.1	4.08333	0.539545	1.25	0.259248	0	0	O95918	3e-139	#DIV/0!	0.480493	#DIV/0!	-1.05741
XM_003507554.1	0	0	1	0.284718	0	0		NA	#DIV/0!	#DIV/0!	#DIV/0!	#DIV/0!
XM_003495465.1	1	0.0114925	3	0.0541165	0	0	Q9P273	0	#DIV/0!	4.70884	#DIV/0!	2.23537
XM_003495456.1	1	0.116174	1	0.182347	0	0	Q9NQL2	0	#DIV/0!	1.56961	#DIV/0!	0.650408
XM_003510966.1	2	0.198042	1	0.155425	0	0	A2RUH7	3e-169	#DIV/0!	0.784806	#DIV/0!	-0.349592
XM_003508365.1	0	0	1	0.214243	0	0	O95274	1e-23	#DIV/0!	#DIV/0!	#DIV/0!	#DIV/0!
XM_003511554.1	8	0.314807	5	0.308828	0	0	Q86UT6	0	#DIV/0!	0.981007	#DIV/0!	-0.0276641
XM_003500259.1	2	0.202734	1	0.159107	0	0	Q6DN72	3e-88	#DIV/0!	0.784806	#DIV/0!	-0.349592
XM_003504055.1	0	0	1	0.15493	0	0	Q9HC77	1e-67	#DIV/0!	#DIV/0!	#DIV/0!	#DIV/0!
XM_003510544.1	3	0.0762122	1	0.0398745	0	0	Q86V15	5e-24	#DIV/0!	0.523204	#DIV/0!	-0.934555
XM_003514706.1	0	0	0.5	0.097471	0	0	Q8NH61	6e-104	#DIV/0!	#DIV/0!	#DIV/0!	#DIV/0!
XM_003515828.1	0.333333	0.0576817	0.333333	0.0905379	0	0	Q2M2I5	3e-36	#DIV/0!	1.56961	#DIV/0!	0.650408
XM_003514604.1	6	0.426613	2	0.223206	0	0	O14793	0	#DIV/0!	0.523204	#DIV/0!	-0.934555
XM_003514996.1	1.89286	0.104939	0.142857	0.0124312	0	0	O75022	9e-89	#DIV/0!	0.118461	#DIV/0!	-3.07751
XM_003499242.1	0	0	1	0.262817	0	0	P57052	5e-83	#DIV/0!	#DIV/0!	#DIV/0!	#DIV/0!
XM_003500497.1	3	0.105774	3	0.166025	0	0	Q9UKX5	0	#DIV/0!	1.56961	#DIV/0!	0.650408
XM_003510550.1	3	0.434329	2	0.454486	0	0		NA	#DIV/0!	1.04641	#DIV/0!	0.0654453
XM_003495081.1	0	0	0.5	0.0581682	0	0	Q9UBL6	7e-51	#DIV/0!	#DIV/0!	#DIV/0!	#DIV/0!
XM_003510943.1	0	0	0.5	0.0580641	0	0	O00748	0	#DIV/0!	#DIV/0!	#DIV/0!	#DIV/0!
XM_003506300.1	0	0	1	0.13496	0	0	Q8WWU5	3e-160	#DIV/0!	#DIV/0!	#DIV/0!	#DIV/0!
XM_003504381.1	0	0	0.5	0.103699	0	0	A4D2G3	2e-137	#DIV/0!	#DIV/0!	#DIV/0!	#DIV/0!
XM_003503062.1	3	0.1528	2	0.159891	0	0	P00747	0	#DIV/0!	1.04641	#DIV/0!	0.0654453
XM_003503910.1	1	0.0852738	1	0.133847	0	0	Q86YJ6	0	#DIV/0!	1.56961	#DIV/0!	0.650408
XM_003511841.1	0.666667	0.19281	0.333333	0.151319	0	0	P69905	4e-48	#DIV/0!	0.784806	#DIV/0!	-0.349592
XM_003509152.1	2	0.107284	1	0.0841968	0	0	Q7Z4T9	7e-92	#DIV/0!	0.784806	#DIV/0!	-0.349592
XM_003508199.1	1	0.0488286	1	0.0766419	0	0	Q9Y5G4	0	#DIV/0!	1.56961	#DIV/0!	0.650408
XM_003514254.1	22	2.78248	8	1.58815	0	0	Q8NGF4	2e-84	#DIV/0!	0.570768	#DIV/0!	-0.809024
XM_003503566.1	3	0.314907	3	0.494282	0	0	Q8TCW9	6e-175	#DIV/0!	1.56961	#DIV/0!	0.650408
XM_003500268.1	1	0.119878	1	0.188161	0	0	Q8NGW6	1e-146	#DIV/0!	1.56961	#DIV/0!	0.650408
XM_003508645.1	2	0.162187	4	0.509143	0	0		NA	#DIV/0!	3.13922	#DIV/0!	1.65041
XM_003501935.1	5	1.45626	5	2.28576	0	0	Q8WXF3	3e-54	#DIV/0!	1.56961	#DIV/0!	0.650408
XM_003511189.1	7	0.647661	3	0.435676	0	0		NA	#DIV/0!	0.672691	#DIV/0!	-0.571985
XM_003496155.1	0	0	1	0.288514	0	0	O60258	8e-101	#DIV/0!	#DIV/0!	#DIV/0!	#DIV/0!
XM_003496837.1	1	0.0695479	3	0.327489	0	0	P01019	5e-169	#DIV/0!	4.70884	#DIV/0!	2.23537
XM_003514523.1	0	0	0.5	0.049353	0	0	Q96N87	0	#DIV/0!	#DIV/0!	#DIV/0!	#DIV/0!
XM_003500103.1	4	0.531933	8	1.66986	0	0	Q14142	1e-92	#DIV/0!	3.13922	#DIV/0!	1.65041
XM_003506296.1	1.5	0.0679482	1	0.0711015	0	0	Q14833	0	#DIV/0!	1.04641	#DIV/0!	0.0654453
XM_003514475.1	0	0	2	0.152504	0	0	P81133	0	#DIV/0!	#DIV/0!	#DIV/0!	#DIV/0!
XM_003500918.1	0.5	0.0149956	0.5	0.0235372	0	0	O14525	0	#DIV/0!	1.56961	#DIV/0!	0.650408
XM_003501412.1	2	0.260112	2	0.408275	0	0	Q15493	1e-79	#DIV/0!	1.56961	#DIV/0!	0.650408
XM_003498111.1	0	0	1	0.135241	0	0	Q9NZI6	0	#DIV/0!	#DIV/0!	#DIV/0!	#DIV/0!
XM_003507147.1	6	0.649599	1	0.169936	0	0	F5GYI3	6e-128	#DIV/0!	0.261602	#DIV/0!	-1.93455
XM_003511471.1	3	0.32969	1	0.172495	0	0	P12235	2e-138	#DIV/0!	0.523204	#DIV/0!	-0.934555
XM_003514760.1	2	0.168121	2	0.263885	0	0	Q9NQL9	4e-149	#DIV/0!	1.56961	#DIV/0!	0.650408
XM_003514583.1	1	0.132557	1	0.208063	0	0	Q8NH09	6e-82	#DIV/0!	1.56961	#DIV/0!	0.650408
XM_003499234.1	0	0	1	0.0680458	0	0	O75473	0	#DIV/0!	#DIV/0!	#DIV/0!	#DIV/0!
XM_003504421.1	2	0.0557383	1	0.0437437	0	0	Q13224	0	#DIV/0!	0.784806	#DIV/0!	-0.349592
XM_003495087.1	2	0.115686	2	0.181582	0	0	O75081	0	#DIV/0!	1.56961	#DIV/0!	0.650408
XM_003513628.1	3	0.239524	1	0.12532	0	0	Q9UBZ4	0	#DIV/0!	0.523204	#DIV/0!	-0.934555
XM_003497966.1	0	0	2	0.403203	0	0	Q6UWB4	2e-113	#DIV/0!	#DIV/0!	#DIV/0!	#DIV/0!
XM_003510201.1	4	0.520224	3	0.612412	0	0	A6ND91	7e-131	#DIV/0!	1.17721	#DIV/0!	0.23537
XM_003511019.1	4	0.172985	3	0.203639	0	0	O00329	0	#DIV/0!	1.17721	#DIV/0!	0.23537
XM_003504861.1	1	0.0514187	1	0.0807075	0	0	A0PJY2	0	#DIV/0!	1.56961	#DIV/0!	0.650408
XM_003499670.1	5	0.416913	2	0.261757	0	0	Q6H9L7	8e-144	#DIV/0!	0.627845	#DIV/0!	-0.67152
XM_003497222.1	0	0	2	0.428486	0	0	Q2M2E3	2e-25	#DIV/0!	#DIV/0!	#DIV/0!	#DIV/0!
XM_003513630.1	2	0.258486	3	0.608585	0	0	Q10588	3e-131	#DIV/0!	2.35442	#DIV/0!	1.23537
XM_003515137.1	2	0.507458	2	0.796512	0	0	Q99445	4e-29	#DIV/0!	1.56961	#DIV/0!	0.650408
XM_003496215.1	3	0.432312	1	0.226187	0	0	P46952	1e-148	#DIV/0!	0.523204	#DIV/0!	-0.934555
XM_003511365.1	0	0	0.5	0.179325	0	0	Q8NH00	2e-45	#DIV/0!	#DIV/0!	#DIV/0!	#DIV/0!
XM_003496394.1	0.5	0.043171	0.25	0.0338808	0	0	O95319	3e-178	#DIV/0!	0.784806	#DIV/0!	-0.349592
XM_003515150.1	1.16667	0.218329	0.5	0.146868	0	0	A6NJ16	1e-35	#DIV/0!	0.672691	#DIV/0!	-0.571985
XM_003503940.1	0.5	0.111177	2	0.698018	0	0	P09681	1e-44	#DIV/0!	6.27845	#DIV/0!	2.65041
XM_003502905.1	0	0	1	0.0733511	0	0	Q96GW7	0	#DIV/0!	#DIV/0!	#DIV/0!	#DIV/0!
XM_003508774.1	0	0	1	0.332901	0	0	Q8TF09	3e-47	#DIV/0!	#DIV/0!	#DIV/0!	#DIV/0!
XM_003503068.1	1	0.0741179	3	0.349009	0	0	O15245	0	#DIV/0!	4.70884	#DIV/0!	2.23537
XM_003501476.1	2.66667	0.771241	0.333333	0.151319	0	0	P69905	2e-53	#DIV/0!	0.196201	#DIV/0!	-2.34959
XM_003497409.1	6	0.569144	3	0.446668	0	0	Q96Q40	0	#DIV/0!	0.784806	#DIV/0!	-0.349592
XM_003515908.1	0	0	1	0.194165	0	0	O14905	2e-173	#DIV/0!	#DIV/0!	#DIV/0!	#DIV/0!
XM_003513812.1	0.25	0.0733294	0.5	0.230198	0	0	A8MTN3	2e-24	#DIV/0!	3.13922	#DIV/0!	1.65041
XM_003499166.1	0	0	1	0.166593	0	0	Q9H165	2e-126	#DIV/0!	#DIV/0!	#DIV/0!	#DIV/0!
XM_003508658.1	0	0	3	0.42062	0	0	Q8WTR8	0	#DIV/0!	#DIV/0!	#DIV/0!	#DIV/0!
XM_003498529.1	0	0	2	0.883207	0	0	Q96A22	2e-35	#DIV/0!	#DIV/0!	#DIV/0!	#DIV/0!
XM_003505727.1	0	0	1	0.0552474	0	0	Q9UPP2	0	#DIV/0!	#DIV/0!	#DIV/0!	#DIV/0!
XM_003498093.1	1	0.272091	1	0.427077	0	0	P56539	1e-83	#DIV/0!	1.56961	#DIV/0!	0.650408
XM_003508200.1	1	0.0508081	4	0.318996	0	0	Q9Y5G5	0	#DIV/0!	6.27845	#DIV/0!	2.65041
XM_003496319.1	4	0.175431	4	0.275358	0	0	Q2TAC6	0	#DIV/0!	1.56961	#DIV/0!	0.650408
XM_003509218.1	2	0.247652	1	0.194358	0	0	Q8NH40	1e-156	#DIV/0!	0.784806	#DIV/0!	-0.349592
XM_003506849.1	0	0	1	0.130878	0	0	Q9NSC7	2e-164	#DIV/0!	#DIV/0!	#DIV/0!	#DIV/0!
XM_003513550.1	0.5	0.0601131	0.5	0.0943542	0	0	Q8WZ94	3e-108	#DIV/0!	1.56961	#DIV/0!	0.650408
XM_003500970.1	1	0.0656473	1	0.103041	0	0	Q9UKG4	0	#DIV/0!	1.56961	#DIV/0!	0.650408
XM_003500600.1	0	0	1	0.268247	0	0		NA	#DIV/0!	#DIV/0!	#DIV/0!	#DIV/0!
XM_003495239.1	1	0.170197	2	0.534286	0	0	Q8IZP7	2e-118	#DIV/0!	3.13922	#DIV/0!	1.65041
XM_003500803.1	0.7	0.0347823	0.5	0.0389962	0	0	Q9Y4J8	0	#DIV/0!	1.12115	#DIV/0!	0.164981
XM_003504777.1	3	0.925921	1	0.484445	0	0	O60896	2e-57	#DIV/0!	0.523204	#DIV/0!	-0.934555
XM_003507424.1	0	0	1	0.188708	0	0	P16188	4e-99	#DIV/0!	#DIV/0!	#DIV/0!	#DIV/0!
XM_003513771.1	2.33333	0.299384	2	0.402786	0	0	A6NND4	8e-127	#DIV/0!	1.34538	#DIV/0!	0.428015
XM_003507749.1	0	0	1	0.574475	0	0	Q9HD89	2e-31	#DIV/0!	#DIV/0!	#DIV/0!	#DIV/0!
XM_003495129.1	3	0.314907	2	0.329521	0	0	Q8WUS8	2e-166	#DIV/0!	1.04641	#DIV/0!	0.0654453
XM_003502524.1	0	0	1	0.306206	0	0	P56597	3e-106	#DIV/0!	#DIV/0!	#DIV/0!	#DIV/0!
XM_003504137.1	5	0.463652	4	0.582204	0	0	Q6UXB8	5e-113	#DIV/0!	1.25569	#DIV/0!	0.32848
XM_003503326.1	0	0	1	0.256584	0	0	Q8N474	1e-32	#DIV/0!	#DIV/0!	#DIV/0!	#DIV/0!
XM_003506417.1	0	0	1	0.270482	0	0	P32971	3e-85	#DIV/0!	#DIV/0!	#DIV/0!	#DIV/0!
XM_003513594.1	1	0.107984	1	0.169493	0	0		NA	#DIV/0!	1.56961	#DIV/0!	0.650408
XM_003499317.1	4	0.0710005	2	0.0557216	0	0	P11277	0	#DIV/0!	0.784806	#DIV/0!	-0.349592
XM_003507221.1	0	0	1	0.256584	0	0	Q9H2W2	4e-54	#DIV/0!	#DIV/0!	#DIV/0!	#DIV/0!
XM_003496746.1	3	0.0762122	2	0.079749	0	0	Q5JPB2	0	#DIV/0!	1.04641	#DIV/0!	0.0654453
XM_003506514.1	0	0	2	0.138119	0	0	Q6S8J7	4e-49	#DIV/0!	#DIV/0!	#DIV/0!	#DIV/0!
XM_003512153.1	0	0	0.5	0.101431	0	0	Q8NH95	3e-139	#DIV/0!	#DIV/0!	#DIV/0!	#DIV/0!
XM_003500219.1	0.666667	0.0439042	0.333333	0.0344563	0	0	Q3ZCT8	0	#DIV/0!	0.784806	#DIV/0!	-0.349592
XM_003502651.1	1.5	0.0952457	2	0.199332	0	0	P40238	0	#DIV/0!	2.09282	#DIV/0!	1.06545
XM_003503019.1	2	0.379429	3	0.893335	0	0	A4D1S5	3e-109	#DIV/0!	2.35442	#DIV/0!	1.23537
XM_003501371.1	0.75	0.0740295	1	0.15493	0	0	P01011	4e-139	#DIV/0!	2.09282	#DIV/0!	1.06545
XM_003513508.1	0.333333	0.0506836	0.5	0.11933	0	0	P01764	2e-45	#DIV/0!	2.35442	#DIV/0!	1.23537
XM_003508212.1	0	0	3	0.693873	0	0	Q15848	9e-103	#DIV/0!	#DIV/0!	#DIV/0!	#DIV/0!
XM_003515755.1	0	0	1	0.275067	0	0		NA	#DIV/0!	#DIV/0!	#DIV/0!	#DIV/0!
XM_003514002.1	1	0.0171041	1	0.0268469	0	0	Q7Z2Y8	0	#DIV/0!	1.56961	#DIV/0!	0.650408
XM_003507309.1	3	0.670667	3	1.05269	0	0	Q8WU39	3e-67	#DIV/0!	1.56961	#DIV/0!	0.650408
XM_003503786.1	2	0.265114	0.5	0.104032	0	0	Q15615	6e-140	#DIV/0!	0.392403	#DIV/0!	-1.34959
XM_003513587.1	1	0.0842318	0.333333	0.0440704	0	0	P33260	0	#DIV/0!	0.523204	#DIV/0!	-0.934555
XM_003503151.1	1	0.0509333	1	0.0799454	0	0	O43526	0	#DIV/0!	1.56961	#DIV/0!	0.650408
XM_003515126.1	4	0.311351	2	0.24435	0	0	P17752	0	#DIV/0!	0.784806	#DIV/0!	-0.349592
XM_003504531.1	0	0	1	0.206082	0	0	O75973	3e-75	#DIV/0!	#DIV/0!	#DIV/0!	#DIV/0!
XM_003496272.1	1	0.0405867	1	0.0637053	0	0	Q13797	0	#DIV/0!	1.56961	#DIV/0!	0.650408
XM_003508186.1	1	0.0439977	1	0.0690593	0	0	Q01974	0	#DIV/0!	1.56961	#DIV/0!	0.650408
XM_003507293.1	2	0.540625	1	0.424286	0	0	Q12988	2e-70	#DIV/0!	0.784806	#DIV/0!	-0.349592
XM_003498278.1	7	0.563239	3	0.378885	0	0	Q8N428	0	#DIV/0!	0.672691	#DIV/0!	-0.571985
XM_003503541.1	0	0	2	0.114322	0	0	Q8N6Y1	0	#DIV/0!	#DIV/0!	#DIV/0!	#DIV/0!
XM_003503919.1	0	0	0.333333	0.0435384	0	0	P41586	0	#DIV/0!	#DIV/0!	#DIV/0!	#DIV/0!
XM_003516053.1	2	0.263146	2	0.413037	0	0	O76001	4e-145	#DIV/0!	1.56961	#DIV/0!	0.650408
XM_003499683.1	0	0	1	0.0484445	0	0	P55287	0	#DIV/0!	#DIV/0!	#DIV/0!	#DIV/0!
XM_003498935.1	1	0.0749236	1	0.117601	0	0	Q96J87	0	#DIV/0!	1.56961	#DIV/0!	0.650408
XM_003497926.1	1	0.0809879	1	0.12712	0	0	P32297	0	#DIV/0!	1.56961	#DIV/0!	0.650408
XM_003504005.1	2	0.161554	1	0.126788	0	0	P42685	0	#DIV/0!	0.784806	#DIV/0!	-0.349592
XM_003498799.1	1	0.0946403	0.333333	0.0495162	0	0	Q9BQ16	0	#DIV/0!	0.523204	#DIV/0!	-0.934555
XM_003508142.1	0	0	3	0.40237	0	0	Q5VXH4	6e-86	#DIV/0!	#DIV/0!	#DIV/0!	#DIV/0!
XM_003508876.1	0	0	2	0.300536	0	0	Q8NBT3	0	#DIV/0!	#DIV/0!	#DIV/0!	#DIV/0!
XM_003503785.1	2	0.263425	1.5	0.310107	0	0	Q15615	1e-141	#DIV/0!	1.17721	#DIV/0!	0.23537
XM_003500122.1	5	0.526181	1	0.16518	0	0	Q9NP85	3e-171	#DIV/0!	0.313922	#DIV/0!	-1.67152
XM_003513554.1	1	0.121284	4	0.761474	0	0	Q8NGD0	3e-163	#DIV/0!	6.27845	#DIV/0!	2.65041
XM_003499480.1	0	0	1	0.10159	0	0	Q49MG5	5e-168	#DIV/0!	#DIV/0!	#DIV/0!	#DIV/0!
XM_003511360.1	0	0	0.333333	0.0638306	0	0	Q8NH00	4e-119	#DIV/0!	#DIV/0!	#DIV/0!	#DIV/0!
XM_003505997.1	0.5	0.0636274	0.5	0.0998703	0	0	Q96RB7	2e-140	#DIV/0!	1.56961	#DIV/0!	0.650408
XM_003503016.1	0	0	0.5	0.0432579	0	0	O75487	0	#DIV/0!	#DIV/0!	#DIV/0!	#DIV/0!
XM_003498682.1	0.5	0.0899083	0.5	0.141121	0	0	Q6ZVN8	3e-96	#DIV/0!	1.56961	#DIV/0!	0.650408
XM_003496864.1	11	3.85539	7	3.85093	0	0	Q9UBU3	1e-52	#DIV/0!	0.998844	#DIV/0!	-0.00166885
XM_003501029.1	0	0	1	0.0991079	0	0	Q9HCR9	0	#DIV/0!	#DIV/0!	#DIV/0!	#DIV/0!
XM_003510914.1	1	0.121641	1	0.190929	0	0	Q9P1P5	5e-179	#DIV/0!	1.56961	#DIV/0!	0.650408
XM_003510365.1	1	0.0645208	2	0.202545	0	0	Q9BXS0	5e-43	#DIV/0!	3.13922	#DIV/0!	1.65041
XM_003503731.1	1	0.0868861	1	0.136378	0	0	Q9UJW2	0	#DIV/0!	1.56961	#DIV/0!	0.650408
XM_003514489.1	1	0.118504	1	0.186005	0	0	A6NL26	1e-138	#DIV/0!	1.56961	#DIV/0!	0.650408
XM_003515375.1	2	0.237916	1	0.186718	0	0	A6NK97	1e-156	#DIV/0!	0.784806	#DIV/0!	-0.349592
XM_003495925.1	0	0	1	0.32621	0	0	B4DJY2	8e-38	#DIV/0!	#DIV/0!	#DIV/0!	#DIV/0!
XM_003512019.1	1	0.152612	1	0.239541	0	0	Q9NP55	1e-69	#DIV/0!	1.56961	#DIV/0!	0.650408
XM_003510057.1	2	0.0882771	1	0.0692804	0	0	P54764	0	#DIV/0!	0.784806	#DIV/0!	-0.349592
XM_003506649.1	2	0.233002	1	0.182861	0	0	Q15166	5e-174	#DIV/0!	0.784806	#DIV/0!	-0.349592
XM_003514406.1	2	0.582504	1	0.457153	0	0		NA	#DIV/0!	0.784806	#DIV/0!	-0.349592
XM_003499796.1	0	0	1	0.332901	0	0	A6NML5	3e-85	#DIV/0!	#DIV/0!	#DIV/0!	#DIV/0!
XM_003513564.1	0	0	1	0.352803	0	0	Q8N6L7	2e-55	#DIV/0!	#DIV/0!	#DIV/0!	#DIV/0!
XM_003508657.1	2	0.227867	7	1.25182	0	0	O75493	1e-162	#DIV/0!	5.49364	#DIV/0!	2.45776
XM_003500144.1	3	0.169886	1	0.088885	0	0	Q8TBJ5	0	#DIV/0!	0.523204	#DIV/0!	-0.934555
XM_003504086.1	1	0.0837202	2	0.262817	0	0	P00742	0	#DIV/0!	3.13922	#DIV/0!	1.65041
XM_003506297.1	1.5	0.0650507	1	0.0680696	0	0	Q14833	0	#DIV/0!	1.04641	#DIV/0!	0.0654453
XM_003515716.1	3	0.648467	3	1.01784	0	0		NA	#DIV/0!	1.56961	#DIV/0!	0.650408
XM_003511372.1	4	0.13309	2	0.10445	0	0	O75443	3e-22	#DIV/0!	0.784806	#DIV/0!	-0.349592
XM_003502095.1	1.5	0.0340487	4.5	0.16033	0	0	P12883	0	#DIV/0!	4.70884	#DIV/0!	2.23537
XM_003515345.1	1	0.110287	5	0.865543	0	0	P32302	2e-180	#DIV/0!	7.84806	#DIV/0!	2.97234
XM_003502555.1	2	0.128841	1	0.101115	0	0	Q8IVT2	0	#DIV/0!	0.784806	#DIV/0!	-0.349592
XM_003500867.1	1	0.0459021	4	0.288194	0	0	O95886	2e-143	#DIV/0!	6.27845	#DIV/0!	2.65041
XM_003515709.1	0	0	1	0.160682	0	0		NA	#DIV/0!	#DIV/0!	#DIV/0!	#DIV/0!
XM_003515048.1	8	1.00873	2	0.395827	0	0	Q8N6Q3	1e-24	#DIV/0!	0.392403	#DIV/0!	-1.34959
XM_003503282.1	0	0	1	0.260706	0	0	A6NFK2	6e-116	#DIV/0!	#DIV/0!	#DIV/0!	#DIV/0!
XM_003508680.1	2	0.174628	4	0.548197	0	0	O75311	0	#DIV/0!	3.13922	#DIV/0!	1.65041
XM_003508532.1	0	0	0.333333	0.0378297	0	0	Q6UWW8	0	#DIV/0!	#DIV/0!	#DIV/0!	#DIV/0!
XM_003501990.1	21	1.59068	17	2.02118	0	0	O43364	9e-125	#DIV/0!	1.27064	#DIV/0!	0.345553
XM_003499320.1	4	0.122632	1	0.0481213	0	0	Q8NCM2	0	#DIV/0!	0.392403	#DIV/0!	-1.34959
XM_003498317.1	7	0.476159	3	0.320308	0	0	P28358	0	#DIV/0!	0.672691	#DIV/0!	-0.571985
XM_003504028.1	4	0.165597	4	0.259923	0	0	Q8TCU5	0	#DIV/0!	1.56961	#DIV/0!	0.650408
NM_001246806.2	11	3.85539	5	2.75067	0	0	P04271	2e-36	#DIV/0!	0.71346	#DIV/0!	-0.487096
XM_003508232.1	1	0.0879953	2	0.276237	0	0	Q7Z5H5	2e-33	#DIV/0!	3.13922	#DIV/0!	1.65041
XM_003501825.1	20	7.13066	6	3.35771	0	0	Q02747	9e-33	#DIV/0!	0.470884	#DIV/0!	-1.08656
XM_003501031.1	5	0.380593	1	0.119477	0	0	Q6ZSG1	6e-180	#DIV/0!	0.313922	#DIV/0!	-1.67152
XM_003498622.1	0.5	0.0488863	0.5	0.0767325	0	0	Q6ZVN8	3e-167	#DIV/0!	1.56961	#DIV/0!	0.650408
XM_003497542.1	1	0.098471	1	0.154561	0	0	P15085	0	#DIV/0!	1.56961	#DIV/0!	0.650408
XM_003500665.1	1	0.0321018	1	0.0503873	0	0	Q8TE60	0	#DIV/0!	1.56961	#DIV/0!	0.650408
XM_003512557.1	0	0	1	0.191869	0	0	A6NDL8	2e-148	#DIV/0!	#DIV/0!	#DIV/0!	#DIV/0!
XM_003505226.1	1.33333	0.178459	1	0.210083	0	0	Q8NGL9	2e-127	#DIV/0!	1.17721	#DIV/0!	0.23537
XM_003511246.1	0	0	1	0.13468	0	0	Q6PI73	1e-75	#DIV/0!	#DIV/0!	#DIV/0!	#DIV/0!
XM_003509753.1	33	2.06476	3	0.294625	0	0	Q8IXW0	9e-151	#DIV/0!	0.142692	#DIV/0!	-2.80902
XM_003497562.1	7	0.720758	5	0.808079	0	0	Q15777	3e-180	#DIV/0!	1.12115	#DIV/0!	0.164981
XM_003506050.1	1	0.0985492	1	0.154684	0	0	P23942	1e-164	#DIV/0!	1.56961	#DIV/0!	0.650408
XM_003495339.1	11	3.29664	1	0.470404	0	0	Q8IVN3	2e-36	#DIV/0!	0.142692	#DIV/0!	-2.80902
XM_003505328.1	3	0.289215	3	0.453956	0	0	Q96A84	7e-133	#DIV/0!	1.56961	#DIV/0!	0.650408
XM_003505028.1	1	0.291252	2	0.914306	0	0	P62841	1e-49	#DIV/0!	3.13922	#DIV/0!	1.65041
XM_003511830.1	0	0	1	0.181837	0	0	Q8TAQ9	2e-145	#DIV/0!	#DIV/0!	#DIV/0!	#DIV/0!
XM_003500564.1	0.333333	0.0558135	0.333333	0.0876055	0	0		NA	#DIV/0!	1.56961	#DIV/0!	0.650408
XM_003509922.1	0.666667	0.0641206	2.08333	0.314514	0	0	P43353	0	#DIV/0!	4.90504	#DIV/0!	2.29426
XM_003511188.1	5	0.338998	1	0.106419	0	0	Q86TZ1	5e-178	#DIV/0!	0.313922	#DIV/0!	-1.67152
XM_003506087.1	1	0.0844037	2	0.264962	0	0	Q6QEF8	0	#DIV/0!	3.13922	#DIV/0!	1.65041
XM_003501270.1	5	0.544182	2	0.341662	0	0	Q2KHT4	4e-119	#DIV/0!	0.627845	#DIV/0!	-0.67152
XM_003504917.1	1	0.0406265	2	0.127536	0	0	O75129	0	#DIV/0!	3.13922	#DIV/0!	1.65041
XM_003507110.1	10	0.37059	3	0.174505	0	0	P20930	6e-55	#DIV/0!	0.470884	#DIV/0!	-1.08656
XM_003502306.1	1	0.12236	2	0.384117	0	0	Q9NUD7	2e-78	#DIV/0!	3.13922	#DIV/0!	1.65041
XM_003515759.1	1	0.157854	1.08333	0.268417	0	0	Q9GZP7	2e-26	#DIV/0!	1.70041	#DIV/0!	0.765885
XM_003512944.1	1	0.102965	3	0.484848	0	0	Q5HYJ1	0	#DIV/0!	4.70884	#DIV/0!	2.23537
XM_003509024.1	0	0	1	0.157181	0	0	Q9UDX3	0	#DIV/0!	#DIV/0!	#DIV/0!	#DIV/0!
XM_003501365.1	0	0	1	0.393428	0	0	Q6UXU6	3e-23	#DIV/0!	#DIV/0!	#DIV/0!	#DIV/0!
XM_003500834.1	3	0.471762	4	0.987311	0	0	P52952	1e-44	#DIV/0!	2.09282	#DIV/0!	1.06545
XM_003506828.1	3	2.17673	1	1.13887	0	0		NA	#DIV/0!	0.523204	#DIV/0!	-0.934555
XM_003510042.1	0	0	0.5	0.0541867	0	0	Q9NP70	3e-111	#DIV/0!	#DIV/0!	#DIV/0!	#DIV/0!
XM_003501954.1	0	0	0.5	0.0834392	0	0	Q9UIV8	1e-149	#DIV/0!	#DIV/0!	#DIV/0!	#DIV/0!
XM_003512825.1	0	0	1	0.169051	0	0	P28906	4e-116	#DIV/0!	#DIV/0!	#DIV/0!	#DIV/0!
XM_003500153.1	8	2.04236	2	0.801428	0	0	Q5SVJ3	4e-60	#DIV/0!	0.392403	#DIV/0!	-1.34959
XM_003509395.1	0	0	1	0.210083	0	0	Q8NFZ6	3e-63	#DIV/0!	#DIV/0!	#DIV/0!	#DIV/0!
XM_003497790.1	0	0	1	0.241322	0	0	P01583	8e-82	#DIV/0!	#DIV/0!	#DIV/0!	#DIV/0!
XM_003514135.1	10	0.749236	1	0.117601	0	0	Q8IYX7	0	#DIV/0!	0.156961	#DIV/0!	-2.67152
XM_003510717.1	2	0.324375	1	0.254571	0	0	Q3KP22	3e-67	#DIV/0!	0.784806	#DIV/0!	-0.349592
XM_003512810.1	0	0	1	0.0762817	0	0	Q7Z5M5	0	#DIV/0!	#DIV/0!	#DIV/0!	#DIV/0!
XM_003504883.1	2	0.551437	1	0.432771	0	0		NA	#DIV/0!	0.784806	#DIV/0!	-0.349592
XM_003504941.1	2	0.176743	3	0.416126	0	0	Q13761	8e-167	#DIV/0!	2.35442	#DIV/0!	1.23537
XM_003500084.1	2	0.110681	1	0.0868631	0	0	P58005	0	#DIV/0!	0.784806	#DIV/0!	-0.349592
XM_003506160.1	0	0	1	0.300536	0	0	P13727	4e-59	#DIV/0!	#DIV/0!	#DIV/0!	#DIV/0!
XM_003509067.1	4	0.343932	1	0.13496	0	0	Q5TFQ8	2e-26	#DIV/0!	0.392403	#DIV/0!	-1.34959
XM_003495991.1	5	1.29243	2	0.811446	0	0	Q9NPZ5	1e-69	#DIV/0!	0.627845	#DIV/0!	-0.67152
XM_003502834.1	2	0.273893	1	0.214953	0	0	A8MPS7	5e-131	#DIV/0!	0.784806	#DIV/0!	-0.349592
XM_003500654.1	1	0.0746531	1	0.117176	0	0	Q8NAP8	0	#DIV/0!	1.56961	#DIV/0!	0.650408
XM_003511043.1	0	0	1.5	0.191304	0	0	P08034	8e-155	#DIV/0!	#DIV/0!	#DIV/0!	#DIV/0!
XM_003500472.1	0	0	0.333333	0.0481928	0	0	Q8NA61	0	#DIV/0!	#DIV/0!	#DIV/0!	#DIV/0!
XM_003503258.1	1	0.222354	1	0.349009	0	0		NA	#DIV/0!	1.56961	#DIV/0!	0.650408
XM_003495028.1	1.5	0.165431	0.5	0.0865543	0	0	Q8WXU2	2e-144	#DIV/0!	0.523204	#DIV/0!	-0.934555
XM_003497974.1	7	0.577854	2	0.259144	0	0	P51451	0	#DIV/0!	0.448461	#DIV/0!	-1.15695
XM_003497393.1	3	0.35756	1	0.187077	0	0	A8MVG2	3e-22	#DIV/0!	0.523204	#DIV/0!	-0.934555
XM_003497583.1	0	0	0.5	0.04903	0	0	P52569	0	#DIV/0!	#DIV/0!	#DIV/0!	#DIV/0!
XM_003501188.1	0	0	1	0.166025	0	0	P28336	0	#DIV/0!	#DIV/0!	#DIV/0!	#DIV/0!
XM_003508603.1	1	0.0328758	2	0.103205	0	0	Q8TF17	0	#DIV/0!	3.13922	#DIV/0!	1.65041
XM_003502084.1	0	0	1	0.119992	0	0	Q9Y572	6e-124	#DIV/0!	#DIV/0!	#DIV/0!	#DIV/0!
XM_003505441.1	0	0	1	0.198519	0	0	Q8NH70	3e-126	#DIV/0!	#DIV/0!	#DIV/0!	#DIV/0!
XM_003507257.1	1	0.0249896	2	0.078448	0	0	Q5JV73	0	#DIV/0!	3.13922	#DIV/0!	1.65041
XM_003510578.1	14	1.83812	4	0.824326	0	0	Q8NGT1	2e-142	#DIV/0!	0.448461	#DIV/0!	-1.15695
XM_003501268.1	0.5	0.0557383	0.5	0.0874875	0	0	Q9NZD1	5e-121	#DIV/0!	1.56961	#DIV/0!	0.650408
XM_003498403.1	0	0	0.333333	0.0274253	0	0	Q14D04	0	#DIV/0!	#DIV/0!	#DIV/0!	#DIV/0!
XM_003500917.1	1.5	0.0448566	0.5	0.0234692	0	0	O14525	0	#DIV/0!	0.523204	#DIV/0!	-0.934555
XM_003500041.1	2	0.364386	1	0.285972	0	0	Q15465	3e-93	#DIV/0!	0.784806	#DIV/0!	-0.349592
XM_003505267.1	0	0	1	0.460395	0	0	Q8IZS6	2e-56	#DIV/0!	#DIV/0!	#DIV/0!	#DIV/0!
XM_003508234.1	0	0	1	0.069877	0	0	Q7RTR0	0	#DIV/0!	#DIV/0!	#DIV/0!	#DIV/0!
NM_001246728.1	3	0.104733	3	0.16439	0	0	P28223	0	#DIV/0!	1.56961	#DIV/0!	0.650408
XM_003511335.1	0	0	1	0.125562	0	0	Q04695	0	#DIV/0!	#DIV/0!	#DIV/0!	#DIV/0!
XM_003513425.1	4	0.33556	3	0.395025	0	0	Q53QW1	5e-59	#DIV/0!	1.17721	#DIV/0!	0.23537
XM_003509295.1	8	0.102307	2	0.0401458	0	0	Q9H251	1e-79	#DIV/0!	0.392403	#DIV/0!	-1.34959
XM_003507731.1	0.5	0.0582504	2	0.365722	0	0	P51681	2e-152	#DIV/0!	6.27845	#DIV/0!	2.65041
XM_003515596.1	1.5	0.18799	2	0.393428	0	0	P0CB47	1e-99	#DIV/0!	2.09282	#DIV/0!	1.06545
XM_003506638.1	0	0	1	0.0778366	0	0	Q04671	0	#DIV/0!	#DIV/0!	#DIV/0!	#DIV/0!
XM_003513231.1	3	0.111577	2	0.116755	0	0	P11532	3e-26	#DIV/0!	1.04641	#DIV/0!	0.0654453
XM_003495279.1	1	0.043126	3	0.203073	0	0	P19827	0	#DIV/0!	4.70884	#DIV/0!	2.23537
XM_003513023.1	1	0.0577623	2	0.181329	0	0	P30203	0	#DIV/0!	3.13922	#DIV/0!	1.65041
XM_003507144.1	4	0.118987	1	0.0466907	0	0	O75339	0	#DIV/0!	0.392403	#DIV/0!	-1.34959
XM_003495887.1	8	0.581481	6	0.684524	0	0	Q9HBY0	0	#DIV/0!	1.17721	#DIV/0!	0.23537
XM_003514269.1	0	0	1	0.272755	0	0	A6NDD5	7e-93	#DIV/0!	#DIV/0!	#DIV/0!	#DIV/0!
XM_003511669.1	0	0	1	0.162696	0	0	P22760	3e-156	#DIV/0!	#DIV/0!	#DIV/0!	#DIV/0!
XM_003507011.1	1	0.131295	1	0.206082	0	0	Q6IF99	7e-120	#DIV/0!	1.56961	#DIV/0!	0.650408
XM_003507160.1	4	0.315708	2	0.24777	0	0	Q495B1	0	#DIV/0!	0.784806	#DIV/0!	-0.349592
XM_003499853.1	4	0.292626	1	0.114827	0	0	Q8N7P1	0	#DIV/0!	0.392403	#DIV/0!	-1.34959
XM_003497611.1	2	0.104703	2	0.164344	0	0	Q5T7N2	1e-151	#DIV/0!	1.56961	#DIV/0!	0.650408
XM_003511927.1	1	0.219988	2	0.690593	0	0	P59768	2e-34	#DIV/0!	3.13922	#DIV/0!	1.65041
XM_003499557.1	4	0.409146	4	0.6422	0	0	P14653	1e-110	#DIV/0!	1.56961	#DIV/0!	0.650408
XM_003515403.1	1.2	0.121939	1	0.159498	0	0	Q8NGR1	4e-112	#DIV/0!	1.30801	#DIV/0!	0.387373
XM_003514949.1	0	0	0.5	0.103041	0	0	Q8WZ92	1e-119	#DIV/0!	#DIV/0!	#DIV/0!	#DIV/0!
XM_003515996.1	3	0.179038	2	0.187347	0	0	Q8IUH8	0	#DIV/0!	1.04641	#DIV/0!	0.0654453
XM_003500627.1	3	0.556383	2	0.582204	0	0	Q969K7	2e-79	#DIV/0!	1.04641	#DIV/0!	0.0654453
XM_003495233.1	1	0.211009	1	0.331203	0	0	P78369	4e-96	#DIV/0!	1.56961	#DIV/0!	0.650408
XM_003504720.1	0.5	0.0636274	0.5	0.0998703	0	0	Q8NGX3	5e-80	#DIV/0!	1.56961	#DIV/0!	0.650408
XM_003511072.1	0	0	2	0.234776	0	0	P15391	2e-167	#DIV/0!	#DIV/0!	#DIV/0!	#DIV/0!
XM_003513541.1	0	0	1	0.189259	0	0	Q86WS5	8e-121	#DIV/0!	#DIV/0!	#DIV/0!	#DIV/0!
XM_003505956.1	2.33333	0.241254	1	0.162289	0	0	P07098	3e-174	#DIV/0!	0.672691	#DIV/0!	-0.571985
XM_003502475.1	0	0	3	0.346525	0	0	Q9UIX4	0	#DIV/0!	#DIV/0!	#DIV/0!	#DIV/0!
XM_003495934.1	2	0.0625685	1	0.0491042	0	0	O95342	0	#DIV/0!	0.784806	#DIV/0!	-0.349592
XM_003512585.1	1	0.0977726	1	0.153465	0	0	Q8N7C3	7e-93	#DIV/0!	1.56961	#DIV/0!	0.650408
XM_003495261.1	1	0.0611802	2	0.192058	0	0	P05060	0	#DIV/0!	3.13922	#DIV/0!	1.65041
XM_003515116.1	5	0.344075	1	0.108013	0	0	Q9H720	0	#DIV/0!	0.313922	#DIV/0!	-1.67152
XM_003501627.1	2.33333	0.249358	0.666667	0.111827	0	0	Q8TEY5	5e-135	#DIV/0!	0.448461	#DIV/0!	-1.15695
XM_003497014.1	2	0.347545	2	0.54551	0	0	P01189	8e-75	#DIV/0!	1.56961	#DIV/0!	0.650408
XM_003511680.1	0	0	1	0.15493	0	0	Q96PX6	2e-143	#DIV/0!	#DIV/0!	#DIV/0!	#DIV/0!
XM_003507542.1	0.928571	0.0218451	1.75	0.0646203	0	0	Q15014	2e-60	#DIV/0!	2.95811	#DIV/0!	1.56468
XM_003507403.1	9	2.29766	2	0.801428	0	0	O15205	2e-63	#DIV/0!	0.348803	#DIV/0!	-1.51952
XM_003508860.1	2	0.270312	1	0.212143	0	0	P0C628	3e-114	#DIV/0!	0.784806	#DIV/0!	-0.349592
XM_003514937.1	2.5	0.211009	0.5	0.0662405	0	0	P46098	0	#DIV/0!	0.313922	#DIV/0!	-1.67152
XM_003510065.1	1	0.390168	1	0.612412	0	0	P08620	1e-52	#DIV/0!	1.56961	#DIV/0!	0.650408
XM_003501628.1	2.33333	0.258025	0.666667	0.115714	0	0	Q8TEY5	2e-129	#DIV/0!	0.448461	#DIV/0!	-1.15695
XM_003508612.1	4	0.479511	3	0.564484	0	0	Q5T9G4	1e-163	#DIV/0!	1.17721	#DIV/0!	0.23537
XM_003510498.1	3	0.0930783	1	0.0486989	0	0	Q9H324	0	#DIV/0!	0.523204	#DIV/0!	-0.934555
XM_003497692.1	2	0.0238763	1	0.0187383	0	0	Q96PZ7	0	#DIV/0!	0.784806	#DIV/0!	-0.349592
XM_003496537.1	1	0.0604646	2	0.189812	0	0	Q8N3L3	0	#DIV/0!	3.13922	#DIV/0!	1.65041
XM_003513819.1	0.833333	0.251568	0.333333	0.157946	0	0	Q8IUG1	3e-26	#DIV/0!	0.627845	#DIV/0!	-0.67152
XM_003495758.1	0	0	1	0.110027	0	0	Q8WW52	0	#DIV/0!	#DIV/0!	#DIV/0!	#DIV/0!
XM_003508674.1	14	0.991454	8	0.889256	0	0	Q9P2U7	0	#DIV/0!	0.896921	#DIV/0!	-0.156947
XM_003501368.1	0.25	0.0245593	1	0.154194	0	0	P01011	3e-123	#DIV/0!	6.27845	#DIV/0!	2.65041
XM_003502082.1	1	0.0218478	1	0.0342925	0	0	Q9P2P1	0	#DIV/0!	1.56961	#DIV/0!	0.650408
XM_003514711.1	0	0	0.333333	0.0691328	0	0	Q8N349	4e-138	#DIV/0!	#DIV/0!	#DIV/0!	#DIV/0!
XM_003507480.1	0	0	1	0.121187	0	0	Q9P2W7	0	#DIV/0!	#DIV/0!	#DIV/0!	#DIV/0!
XM_003514202.1	0	0	1	0.107476	0	0	P12036	8e-43	#DIV/0!	#DIV/0!	#DIV/0!	#DIV/0!
XM_003510646.1	0	0	2	0.406995	0	0	P09758	6e-128	#DIV/0!	#DIV/0!	#DIV/0!	#DIV/0!
XM_003511555.1	0	0	1	0.130092	0	0	Q86UT5	0	#DIV/0!	#DIV/0!	#DIV/0!	#DIV/0!
XM_003509569.1	5	0.630454	2	0.395827	0	0	Q15759	1e-170	#DIV/0!	0.627845	#DIV/0!	-0.67152
XM_003499299.1	0	0	0.5	0.17834	0	0	P05976	4e-74	#DIV/0!	#DIV/0!	#DIV/0!	#DIV/0!
XM_003505347.1	1	0.0633351	2	0.198823	0	0	Q7KZI7	4e-70	#DIV/0!	3.13922	#DIV/0!	1.65041
XM_003513810.1	0.666667	0.175617	1	0.413476	0	0		NA	#DIV/0!	2.35442	#DIV/0!	1.23537
XM_003509518.1	0.5	0.0787268	0.25	0.0617852	0	0	Q9GZP7	5e-29	#DIV/0!	0.784806	#DIV/0!	-0.349592
XM_003515397.1	7	1.50784	3	1.01431	0	0	Q15669	7e-105	#DIV/0!	0.672691	#DIV/0!	-0.571985
XM_003497125.1	0.5	0.0564997	0.5	0.0886826	0	0	Q9Y5W5	0	#DIV/0!	1.56961	#DIV/0!	0.650408
XM_003513050.1	0	0	0.5	0.104032	0	0	Q8NGJ3	1e-151	#DIV/0!	#DIV/0!	#DIV/0!	#DIV/0!
XM_003508966.1	0.5	0.162826	0.5	0.255574	0	0		NA	#DIV/0!	1.56961	#DIV/0!	0.650408
XM_003512331.1	0	0	0.5	0.0924725	0	0	P04436	3e-21	#DIV/0!	#DIV/0!	#DIV/0!	#DIV/0!
XM_003511397.1	0	0	1	0.205429	0	0	Q8NGI8	1e-134	#DIV/0!	#DIV/0!	#DIV/0!	#DIV/0!
XM_003515035.1	1	0.102118	1	0.160286	0	0	Q6XZF7	2e-39	#DIV/0!	1.56961	#DIV/0!	0.650408
XM_003516189.1	6.13333	1.40403	1	0.359312	0	0	Q9UL59	2e-46	#DIV/0!	0.255915	#DIV/0!	-1.96626
XM_003501456.1	0	0	0.5	0.0683323	0	0	P56178	6e-165	#DIV/0!	#DIV/0!	#DIV/0!	#DIV/0!
XM_003504486.1	0.5	0.037394	1.5	0.176082	0	0	Q14168	0	#DIV/0!	4.70884	#DIV/0!	2.23537
XM_003496003.1	1	0.147706	1	0.231842	0	0	Q7Z419	1e-148	#DIV/0!	1.56961	#DIV/0!	0.650408
XM_003499666.1	0	0	1	0.245893	0	0	Q8N966	2e-135	#DIV/0!	#DIV/0!	#DIV/0!	#DIV/0!
XM_003512127.1	0.664225	0.0539703	0.209524	0.0267218	0	0	Q9Y5E4	7e-36	#DIV/0!	0.49512	#DIV/0!	-1.01415
XM_003514452.1	0	0	1	0.206082	0	0	Q8NGN0	1e-153	#DIV/0!	#DIV/0!	#DIV/0!	#DIV/0!
XM_003507159.1	2	0.252953	3	0.595557	0	0	C9JR72	1e-146	#DIV/0!	2.35442	#DIV/0!	1.23537
XM_003506039.1	0	0	1	0.202862	0	0	Q8NH51	3e-122	#DIV/0!	#DIV/0!	#DIV/0!	#DIV/0!
XM_003504860.1	1.5	0.886239	1	0.927367	0	0	P62857	2e-25	#DIV/0!	1.04641	#DIV/0!	0.0654453
XM_003506425.1	3	0.100873	4	0.211108	0	0	Q9BZV3	0	#DIV/0!	2.09282	#DIV/0!	1.06545
XM_003501824.1	3	0.051066	2	0.0534359	0	0	Q5T1R4	0	#DIV/0!	1.04641	#DIV/0!	0.0654453
XM_003503323.1	0	0	1	0.117176	0	0	Q6XPS3	0	#DIV/0!	#DIV/0!	#DIV/0!	#DIV/0!
XM_003505458.1	1	0.162826	3	0.766721	0	0	Q7Z692	3e-83	#DIV/0!	4.70884	#DIV/0!	2.23537
XM_003496382.1	2.2	0.0671823	1	0.0479318	0	0	Q9NWB1	9e-180	#DIV/0!	0.71346	#DIV/0!	-0.487096
XM_003498163.1	2	0.612708	1	0.480857	0	0	Q16143	1e-46	#DIV/0!	0.784806	#DIV/0!	-0.349592
XM_003503780.1	0	0	1	0.135807	0	0	Q2M3G0	8e-48	#DIV/0!	#DIV/0!	#DIV/0!	#DIV/0!
XM_003497948.1	4	2.9023	1	1.13887	0	0	P62273	1e-25	#DIV/0!	0.392403	#DIV/0!	-1.34959
XM_003514174.1	1	0.0561164	1	0.088081	0	0	P01031	2e-98	#DIV/0!	1.56961	#DIV/0!	0.650408
XM_003510315.1	1.5	0.227241	1	0.237786	0	0	Q8TDM6	2e-27	#DIV/0!	1.04641	#DIV/0!	0.0654453
XM_003514385.1	3	0.21392	1.66667	0.186539	0	0	Q9BY79	0	#DIV/0!	0.872007	#DIV/0!	-0.197589
XM_003516141.1	0	0	0.5	0.315125	0	0	Q9UK85	2e-32	#DIV/0!	#DIV/0!	#DIV/0!	#DIV/0!
XM_003513929.1	0	0	0.5	0.103041	0	0	Q8NH61	3e-105	#DIV/0!	#DIV/0!	#DIV/0!	#DIV/0!
XM_003503390.1	0	0	1	0.0939446	0	0	Q504Y0	0	#DIV/0!	#DIV/0!	#DIV/0!	#DIV/0!
XM_003508038.1	1	0.0477573	1	0.0749604	0	0	Q96DR7	0	#DIV/0!	1.56961	#DIV/0!	0.650408
XM_003514961.1	1	0.0642202	1	0.100801	0	0	Q6ZMN7	0	#DIV/0!	1.56961	#DIV/0!	0.650408
XM_003505230.1	1	0.135599	2	0.425677	0	0	Q6IEV9	5e-136	#DIV/0!	3.13922	#DIV/0!	1.65041
XM_003498798.1	1.5	0.142942	0.333333	0.0498584	0	0	Q9BQ16	0	#DIV/0!	0.348803	#DIV/0!	-1.51952
XM_003496379.1	5	0.464694	1	0.145878	0	0	P80404	0	#DIV/0!	0.313922	#DIV/0!	-1.67152
XM_003496021.1	18	1.50392	8	1.04914	0	0	Q9HC62	7e-129	#DIV/0!	0.697605	#DIV/0!	-0.519517
XM_003507085.1	0	0	2	0.115817	0	0	P51841	0	#DIV/0!	#DIV/0!	#DIV/0!	#DIV/0!
XM_003495202.1	1	0.0304849	1	0.0478494	0	0	Q9UPQ7	0	#DIV/0!	1.56961	#DIV/0!	0.650408
XM_003503592.1	1	0.126091	1	0.197914	0	0	Q8NGB9	4e-137	#DIV/0!	1.56961	#DIV/0!	0.650408
XM_003501325.1	0	0	1	0.210765	0	0	Q96F15	6e-92	#DIV/0!	#DIV/0!	#DIV/0!	#DIV/0!
XM_003515652.1	1	0.104439	2	0.327857	0	0	Q674X7	0	#DIV/0!	3.13922	#DIV/0!	1.65041
XM_003497909.1	36	1.9007	4	0.331484	0	0	Q2M3C6	0	#DIV/0!	0.174401	#DIV/0!	-2.51952
XM_003501293.1	1.5	0.133126	0.5	0.069652	0	0	Q8WXI3	0	#DIV/0!	0.523204	#DIV/0!	-0.934555
XM_003500421.1	4	0.308257	1	0.120961	0	0	P31371	7e-111	#DIV/0!	0.392403	#DIV/0!	-1.34959
XM_003512176.1	2	0.0850984	1	0.0667857	0	0	Q96KW2	0	#DIV/0!	0.784806	#DIV/0!	-0.349592
XM_003506234.1	0	0	1	0.164761	0	0	Q9HA82	7e-137	#DIV/0!	#DIV/0!	#DIV/0!	#DIV/0!
XM_003509014.1	0	0	1	0.153103	0	0	Q99999	0	#DIV/0!	#DIV/0!	#DIV/0!	#DIV/0!
XM_003512645.1	0	0	1	0.189627	0	0	Q6IFH4	2e-121	#DIV/0!	#DIV/0!	#DIV/0!	#DIV/0!
XM_003505208.1	5	0.606419	1	0.190369	0	0	Q8NH19	4e-89	#DIV/0!	0.313922	#DIV/0!	-1.67152
XM_003503765.1	0	0	2	0.110307	0	0	Q7L985	0	#DIV/0!	#DIV/0!	#DIV/0!	#DIV/0!
XM_003499930.1	4	0.362788	1	0.142359	0	0	Q9BTY2	0	#DIV/0!	0.392403	#DIV/0!	-1.34959
XM_003513006.1	1	0.0893257	1	0.140207	0	0	P33402	0	#DIV/0!	1.56961	#DIV/0!	0.650408
XM_003513720.1	0	0	0.333333	0.100179	0	0	P02794	3e-55	#DIV/0!	#DIV/0!	#DIV/0!	#DIV/0!
XM_003502465.1	0.5	0.0844037	0.5	0.132481	0	0	P12018	2e-31	#DIV/0!	1.56961	#DIV/0!	0.650408
XM_003507288.1	1	0.08545	3	0.40237	0	0	Q9UBF9	0	#DIV/0!	4.70884	#DIV/0!	2.23537
XM_003514463.1	0	0	1	0.132481	0	0	Q9Y6X5	0	#DIV/0!	#DIV/0!	#DIV/0!	#DIV/0!
XM_003509856.1	0	0	0.5	0.100179	0	0	O95847	2e-177	#DIV/0!	#DIV/0!	#DIV/0!	#DIV/0!
XM_003510410.1	0	0	0.5	0.20371	0	0	Q9UKJ1	3e-36	#DIV/0!	#DIV/0!	#DIV/0!	#DIV/0!
XM_003495687.1	3.5	0.391222	1	0.175448	0	0	P30874	0	#DIV/0!	0.448461	#DIV/0!	-1.15695
XM_003508533.1	0	0	0.333333	0.0412163	0	0	Q6UWW8	0	#DIV/0!	#DIV/0!	#DIV/0!	#DIV/0!
XM_003508983.1	0	0	1	0.0699271	0	0	Q70JA7	0	#DIV/0!	#DIV/0!	#DIV/0!	#DIV/0!
XM_003510558.1	1	0.147882	1	0.232118	0	0		NA	#DIV/0!	1.56961	#DIV/0!	0.650408
XM_003503158.1	0.5	0.0133498	0.25	0.010477	0	0	O60706	0	#DIV/0!	0.784806	#DIV/0!	-0.349592
XM_003501726.1	0	0	1	0.106245	0	0	Q9HCQ5	0	#DIV/0!	#DIV/0!	#DIV/0!	#DIV/0!
XM_003497850.1	1	0.148236	1	0.232673	0	0	P41217	6e-110	#DIV/0!	1.56961	#DIV/0!	0.650408
XM_003514914.1	5	0.15432	3	0.145334	0	0	Q9P2K9	0	#DIV/0!	0.941767	#DIV/0!	-0.0865577
XM_003508720.1	2	0.0759556	2	0.119221	0	0	Q7RTR2	0	#DIV/0!	1.56961	#DIV/0!	0.650408
XM_003507046.1	3	0.396401	3	0.622195	0	0	Q9UK22	9e-126	#DIV/0!	1.56961	#DIV/0!	0.650408
XM_003499277.1	6	0.174916	1	0.0457582	0	0	Q8TER0	0	#DIV/0!	0.261602	#DIV/0!	-1.93455
XM_003509246.1	1	0.153746	1	0.241322	0	0	Q5QGZ9	4e-51	#DIV/0!	1.56961	#DIV/0!	0.650408
XM_003503188.1	0.5	0.166765	0.5	0.261757	0	0	A6NC42	5e-27	#DIV/0!	1.56961	#DIV/0!	0.650408
XM_003502094.1	3	0.409483	1	0.214243	0	0	Q13268	1e-95	#DIV/0!	0.523204	#DIV/0!	-0.934555
XM_003497863.1	1	0.0886239	1.5	0.208658	0	0	Q8IYP9	5e-175	#DIV/0!	2.35442	#DIV/0!	1.23537
XM_003500469.1	13	0.842714	7	0.712241	0	0	P11940	0	#DIV/0!	0.845176	#DIV/0!	-0.242677
XM_003505774.1	1	0.0552174	4	0.346679	0	0	Q86UG4	1e-148	#DIV/0!	6.27845	#DIV/0!	2.65041
XM_003512439.1	0	0	1	0.140917	0	0	Q14031	0	#DIV/0!	#DIV/0!	#DIV/0!	#DIV/0!
XM_003499590.1	3	0.23148	3	0.363334	0	0	Q14451	0	#DIV/0!	1.56961	#DIV/0!	0.650408
XM_003497538.1	0	0	1	0.148209	0	0	P48052	0	#DIV/0!	#DIV/0!	#DIV/0!	#DIV/0!
XM_003514825.1	0	0	1	0.204137	0	0	Q8NGK5	1e-144	#DIV/0!	#DIV/0!	#DIV/0!	#DIV/0!
XM_003510177.1	0	0	0.5	0.161482	0	0	Q9UMR7	6e-46	#DIV/0!	#DIV/0!	#DIV/0!	#DIV/0!
XM_003506693.1	0	0	0.5	0.0863241	0	0	A6NFN3	2e-124	#DIV/0!	#DIV/0!	#DIV/0!	#DIV/0!
XM_003514501.1	0.666667	0.0684165	0.5	0.0805406	0	0	Q8NGE0	3e-131	#DIV/0!	1.17721	#DIV/0!	0.23537
XM_003501339.1	0	0	1	0.313602	0	0	P43115	1e-75	#DIV/0!	#DIV/0!	#DIV/0!	#DIV/0!
XM_003504063.1	1	0.0721777	1	0.113291	0	0	Q8N878	9e-126	#DIV/0!	1.56961	#DIV/0!	0.650408
XM_003494979.1	0	0	1	0.392635	0	0		NA	#DIV/0!	#DIV/0!	#DIV/0!	#DIV/0!
XM_003501815.1	5	0.871302	2	0.547042	0	0	Q7Z6W1	9e-77	#DIV/0!	0.627845	#DIV/0!	-0.67152
XM_003511903.1	4	0.281825	1	0.110589	0	0	Q8TC71	0	#DIV/0!	0.392403	#DIV/0!	-1.34959
XM_003496393.1	0.5	0.0378966	0.25	0.0297415	0	0	O95319	0	#DIV/0!	0.784806	#DIV/0!	-0.349592
XM_003515796.1	0	0	0.333333	0.0420984	0	0	Q13316	6e-44	#DIV/0!	#DIV/0!	#DIV/0!	#DIV/0!
XM_003512126.1	3.47619	0.19246	2.45952	0.213737	0	0	Q9Y5E4	0	#DIV/0!	1.11055	#DIV/0!	0.15128
XM_003516035.1	1	0.116065	1	0.182177	0	0	P43026	4e-68	#DIV/0!	1.56961	#DIV/0!	0.650408
XM_003509109.1	0	0	0.333333	0.0669925	0	0	Q8NG99	2e-110	#DIV/0!	#DIV/0!	#DIV/0!	#DIV/0!
XM_003497218.1	2	0.279445	1	0.21931	0	0	O95631	2e-122	#DIV/0!	0.784806	#DIV/0!	-0.349592
XM_003512248.1	0.45	0.0590826	0.5	0.103041	0	0	Q8NGG8	2e-97	#DIV/0!	1.74401	#DIV/0!	0.802411
XM_003509865.1	0	0	1	0.192628	0	0	Q8NGM9	2e-144	#DIV/0!	#DIV/0!	#DIV/0!	#DIV/0!
XM_003495322.1	3	0.272091	2	0.284718	0	0	O60269	3e-178	#DIV/0!	1.04641	#DIV/0!	0.0654453
XM_003505259.1	3	0.873756	1	0.457153	0	0	Q16674	3e-32	#DIV/0!	0.523204	#DIV/0!	-0.934555
XM_003508202.1	0	0	1	0.0799454	0	0	Q9Y5G7	0	#DIV/0!	#DIV/0!	#DIV/0!	#DIV/0!
XM_003514521.1	3	0.184176	1	0.0963617	0	0	Q695T7	0	#DIV/0!	0.523204	#DIV/0!	-0.934555
XM_003505339.1	396	38.9945	273	42.1952	5	0.31315	Q99983	0	134.744	1.08208	7.07408	0.113808
XM_003505338.1	101	11.2289	71	12.3898	2	0.141423	P20774	2e-137	87.6085	1.10339	6.453	0.141943
XM_003512732.1	61	11.6259	35	10.4703	1	0.121219	Q9UHP7	4e-35	86.3746	0.900597	6.43254	-0.151046
XM_003507261.1	5	0.306505	32	3.07901	1	0.038989	P08476	0	78.9711	10.0455	6.30325	3.32848
XM_003508436.1	167	25.0851	64	15.0894	2	0.191075	P23409	4e-116	78.9711	0.601528	6.30325	-0.733296
XM_003500137.1	68	12.9006	55	16.3778	2	0.241327	Q96C74	3e-92	67.8658	1.26954	6.08461	0.344305
XM_003505336.1	136	15.0392	80	13.8857	3	0.210999	Q9BXN1	2e-174	65.8092	0.923301	6.04022	-0.115127
XM_003505337.1	266	15.3078	155	14.0008	6	0.219612	O94769	0	63.7527	0.914623	5.99441	-0.12875
XM_003511109.1	157	13.8153	117	16.1599	5	0.279836	Q99680	0	57.7476	1.16971	5.85169	0.226152
XM_003502538.1	397	16.8458	185	12.3215	8	0.215906	O43300	0	57.0689	0.731431	5.83463	-0.451206
XM_003499719.1	31	2.99554	22	3.33679	1	0.0614593	Q96GM1	2e-144	54.2926	1.11392	5.76268	0.155643
XM_003507048.1	21	7.89558	21	12.393	1	0.239133		NA	51.8248	1.56961	5.69557	0.650408
XM_003508940.1	27	4.81319	20	5.59618	1	0.113382	Q6BDI9	3e-94	49.3569	1.16268	5.62518	0.217448
XM_003512637.1	12.5	2.47355	9.5	2.95071	0.5	0.0629297	P02792	2e-60	46.8891	1.19291	5.55118	0.254479
XM_003513645.1	27	2.49255	18	2.60822	1	0.0587156	Q7L5Y1	0	44.4212	1.04641	5.47318	0.0654453
XM_003512906.1	10.5	0.292036	8.5	0.371072	0.5	0.00884485	P02458	9e-57	41.9534	1.27064	5.39072	0.345553
XM_003512907.1	10.5	0.30603	8.5	0.388854	0.5	0.00926871	P02458	6e-63	41.9534	1.27064	5.39072	0.345553
XM_003505504.1	29	2.6418	24.75	3.53891	1.5	0.0869095	P04746	0	40.7195	1.33958	5.34765	0.421783
XM_003505306.1	43.7333	5.89158	16	3.38323	1	0.0856827	Q9HBM6	9e-115	39.4855	0.574248	5.30325	-0.800254
XM_003506686.1	95	10.5335	32	5.56917	2	0.141043	Q9NZV8	0	39.4855	0.528711	5.30325	-0.919448
XM_003505505.1	26.5	2.53699	23	3.45616	1.5	0.0913354	P04746	2e-79	37.8403	1.3623	5.24185	0.446049
XM_003507950.1	29	7.44954	15	6.04805	1	0.163383	Q96QH8	2e-61	37.0177	0.811868	5.21014	-0.300683
XM_003503287.1	184	12.1111	60	6.19885	4	0.167456	Q63HM9	0	37.0177	0.51183	5.21014	-0.966264
XM_003503135.1	96	21.9356	90	32.2785	6	0.871976	Q9NZ72	1e-83	37.0177	1.47151	5.21014	0.557298
XM_003510773.1	123	4.63017	30	1.77258	2	0.0478846	Q9H3W5	0	37.0177	0.382832	5.21014	-1.38522
XM_003498028.1	77	4.38442	30	2.68124	2	0.0724312	Q7Z6J6	0	37.0177	0.611537	5.21014	-0.709488
XM_003500297.1	180	12.992	119	13.4816	8	0.367254	Q8WVF5	2e-139	36.7092	1.03769	5.19807	0.0533725
XM_003495781.1	200	13.3126	89	9.29855	6	0.254014	P23515	0	36.6064	0.698477	5.19402	-0.517715
XM_003505102.1	105	10.5147	44	6.91596	3	0.191075	P15976	1e-151	36.1951	0.657742	5.17772	-0.604406
XM_003503961.1	33	2.62969	14	1.7511	1	0.0506832	Q8NHY0	0	34.5498	0.665896	5.11061	-0.586631
XM_003496154.1	71	13.7859	42	12.8003	3	0.370487	Q86SE8	2e-50	34.5498	0.928503	5.11061	-0.107022
XM_003496600.1	9	0.732717	14	1.78902	1	0.0517807	Q6ZTZ1	1e-126	34.5498	2.44162	5.11061	1.28784
XM_003504051.1	9	0.896916	13.5	2.11172	1	0.0633846	Q6NXR0	4e-62	33.3159	2.35442	5.05814	1.23537
XM_003504580.1	41	3.28618	39	4.90642	3	0.152934	Q9UBG7	0	32.082	1.49305	5.00369	0.578258
XM_003509322.1	79	5.80331	13	1.49894	1	0.0467222	Q96DL1	0	32.082	0.258291	5.00369	-1.95293
XM_003503772.1	18	2.26964	13	2.57288	1	0.0801969	Q5TEZ5	1e-115	32.082	1.13361	5.00369	0.180923
XM_003504768.1	208	44.8043	128	43.2771	10	1.37003		NA	31.5884	0.965915	4.98132	-0.0500319
XM_003503576.1	31.8333	4.20625	12.3333	2.55791	1	0.0840402	Q8NGB8	9e-129	30.4368	0.608122	4.92774	-0.717568
XM_003501324.1	205	25.2332	132	25.5026	11	0.861162	Q96F15	1e-88	29.6142	1.01068	4.88821	0.0153219
XM_003507192.1	57	21.2378	36	21.0537	3	0.710935	O15130	2e-29	29.6142	0.991334	4.88821	-0.0125572
XM_003504686.1	54	6.41759	24	4.47694	2	0.151176	Q6ZNQ3	3e-115	29.6142	0.697605	4.88821	-0.519517
XM_003510298.1	7.5	0.465043	11.75	1.14357	1	0.0394372	Q15014	1e-58	28.9972	2.45906	4.85784	1.29811
XM_003504988.1	98	10.8953	82	14.3094	7	0.494979	Q8N4T4	1e-129	28.9091	1.31335	4.85345	0.39325
XM_003497857.1	26	0.583769	23	0.810565	2	0.0285609	Q96MT7	6e-103	28.3802	1.3885	4.82681	0.47353
XM_003510789.1	92	14.863	45	11.411	4	0.411009	P12018	2e-26	27.7633	0.767745	4.79511	-0.381301
XM_003494973.1	16.5	1.54041	5.5	0.805951	0.5	0.0296892	P61812	0	27.1463	0.523204	4.76268	-0.934555
XM_003501022.1	23	2.6947	22	4.04574	2	0.149035	Q0ZLH3	0	27.1463	1.50137	4.76268	0.586278
XM_003502493.1	6	0.323108	11	0.929782	1	0.0342508	Q8IV61	0	27.1463	2.87762	4.76268	1.52488
XM_003499059.1	10	0.557383	11	0.962362	1	0.0354509	Q08188	0	27.1463	1.72657	4.76268	0.787911
XM_003501030.1	6	0.162719	11	0.468244	1	0.0172489	Q6ZP82	0	27.1463	2.87762	4.76268	1.52488
XM_003513884.1	5	0.552912	11	1.90929	1	0.0703331	Q9H6B4	3e-146	27.1463	3.45315	4.76268	1.78791
XM_003508398.1	13	0.97049	11	1.28894	1	0.0474812	Q86VQ3	6e-94	27.1463	1.32813	4.76268	0.4094
XM_003500184.1	343	22.3046	152	15.5144	14	0.579032	P22557	0	26.7938	0.695571	4.74382	-0.523729
XM_003505501.1	6	0.529098	5.41667	0.749737	0.5	0.0280433	P04746	0	26.735	1.41701	4.74066	0.502851
XM_003505500.1	7	0.556383	5.41667	0.675772	0.5	0.0252767	P04746	0	26.735	1.21458	4.74066	0.280458
XM_003502617.1	37	2.46813	52	5.44454	5	0.212134	Q9NYY3	3e-111	25.6656	2.20594	4.68176	1.14139
XM_003507940.1	2.33333	0.168415	2.03333	0.230358	0.2	0.00918136	Q96L34	1e-53	25.0898	1.3678	4.64903	0.451862
XM_003508492.1	19	3.52376	10	2.91102	1	0.117958	Q99944	2e-58	24.6785	0.826112	4.62518	-0.275592
XM_003504457.1	19	1.17342	20	1.93875	2	0.0785603	O76083	0	24.6785	1.65222	4.62518	0.724408
XM_003496784.1	59	8.77738	40	9.34039	4	0.378483	Q8NHY5	2e-98	24.6785	1.06414	4.62518	0.0896929
XM_003514781.1	17	1.48017	10	1.36665	1	0.0553781	P41219	7e-169	24.6785	0.923301	4.62518	-0.115127
XM_003514001.1	11	0.187293	5	0.133626	0.5	0.0054147	Q7Z2Y8	0	24.6785	0.71346	4.62518	-0.487096
XM_003495863.1	8	0.887031	10	1.74037	1	0.0705217	Q14093	1e-28	24.6785	1.96201	4.62518	0.972336
XM_003495862.1	5	0.560404	5	0.879616	0.5	0.0356431	Q9NWF9	8e-159	24.6785	1.56961	4.62518	0.650408
XM_003509437.1	215	59.2795	89	38.5166	9	1.57828	Q15828	2e-48	24.4043	0.649746	4.60906	-0.622052
XM_003513005.1	141	66.2665	79	58.2766	8	2.39133	P81277	3e-23	24.37	0.879428	4.60703	-0.185363
XM_003502165.1	6.7873	2.69911	24.7206	15.4304	2.55397	0.645972	P62805	4e-41	23.887	5.71682	4.57816	2.51521
XM_003503266.1	75	12.0694	19	4.79921	2	0.204705	P28074	2e-75	23.4445	0.397635	4.55118	-1.33048
XM_003497900.1	14	0.983594	28	3.08772	3	0.134055	Q8WW22	0	23.0332	3.13922	4.52564	1.65041
XM_003505502.1	5.5	0.508877	4.66667	0.677718	0.5	0.0294235	P04746	1e-77	23.0332	1.33179	4.52564	0.413369
XM_003495250.1	13.9176	0.838254	9.25411	0.874859	1	0.0383077	P60880	7e-114	22.8377	1.04367	4.51335	0.0616631
XM_003505019.1	263	41.3578	109	26.9042	12	1.20021	Q8N0W7	9e-25	22.4163	0.650524	4.48647	-0.620327
XM_003508360.1	3	0.530228	9	2.49676	1	0.112413	Q6NXR0	1e-92	22.2106	4.70884	4.47318	2.23537
XM_003500183.1	359	22.8071	153	15.2567	17	0.68691	P22557	0	22.2106	0.668943	4.47318	-0.580044
XM_003503034.1	13	0.995651	9	1.08193	1	0.0487122	P0C1S8	1e-168	22.2106	1.08665	4.47318	0.119893
XM_003515428.1	2.33333	0.748074	3	1.50967	0.333333	0.0679705	Q15797	7e-54	22.2106	2.01807	4.47318	1.01298
XM_003498136.1	7	0.303782	9	0.613055	1	0.0276019	Q6ZN44	0	22.2106	2.01807	4.47318	1.01298
XM_003508848.1	20	11.9878	9	8.46726	1	0.381226	P63218	1e-25	22.2106	0.706325	4.47318	-0.501595
XM_003494974.1	17.5	1.744	4.5	0.703905	0.5	0.0316923	P61812	0	22.2106	0.403614	4.47318	-1.30895
XM_003511301.1	6	0.289553	9	0.681728	1	0.0306938	Q8NHY3	0	22.2106	2.35442	4.47318	1.23537
XM_003511292.1	0	0	9	5.12492	1	0.230742	P06702	4e-31	22.2106	#DIV/0!	4.47318	#DIV/0!
XM_003508435.1	78	12.6012	44	11.1574	5	0.513762	P13349	2e-117	21.717	0.885422	4.44076	-0.175563
XM_003498607.1	26	2.44944	26	3.84467	3	0.179758	P48165	0	21.388	1.56961	4.41873	0.650408
XM_003508467.1	5.66667	0.30756	2.83333	0.241375	0.333333	0.0115068	P06681	0	20.9767	0.784806	4.39072	-0.349592
XM_003495782.1	42	3.81764	34	4.85084	4	0.231249	P34910	2e-107	20.9767	1.27064	4.39072	0.345553
XM_003508468.1	5.66667	0.306755	2.83333	0.240743	0.333333	0.0114767	P06681	0	20.9767	0.784806	4.39072	-0.349592
XM_003504991.1	48	1.62586	17	0.903822	2	0.043087	P98198	0	20.9767	0.555904	4.39072	-0.847092
XM_003502511.1	75	7.79356	17	2.77278	2	0.132184	P78310	6e-35	20.9767	0.355779	4.39072	-1.49095
XM_003508893.1	33	2.21201	21	2.20945	2.5	0.106583	Q9UGH3	2e-157	20.7299	0.998844	4.37364	-0.00166885
XM_003505503.1	47	3.73332	36.75	4.58192	4.5	0.227344	P04746	0	20.1541	1.2273	4.333	0.295491
XM_003500256.1	6	0.593653	8	1.24241	1	0.0629297	Q96A28	3e-71	19.7428	2.09282	4.30325	1.06545
XM_003506018.1	29	3.83187	8	1.65919	1	0.0840402	Q8NGQ1	2e-149	19.7428	0.432996	4.30325	-1.20757
XM_003498975.1	17	2.17448	8	1.60616	1	0.0813544	Q14088	8e-135	19.7428	0.738641	4.30325	-0.437055
XM_003503038.1	1	0.0323867	8	0.406676	1	0.0205987		NA	19.7428	12.5569	4.30325	3.65041
XM_003503106.1	30	4.00237	16	3.35049	2	0.169707		NA	19.7428	0.837126	4.30325	-0.256483
XM_003506656.1	3.5	0.168317	4	0.301933	0.5	0.0152934	Q9C098	0	19.7428	1.79384	4.30325	0.843053
XM_003499116.1	7	0.198699	8	0.356435	1	0.0180539	Q9H0B3	4e-74	19.7428	1.79384	4.30325	0.843053
XM_003499190.1	10	0.369927	8	0.464513	1	0.0235283	Q6ZWH5	0	19.7428	1.25569	4.30325	0.32848
XM_003506757.1	15	1.0922	8	0.914306	1	0.0463109	Q9NYM4	1e-100	19.7428	0.837126	4.30325	-0.256483
XM_003503211.1	5	3.5049	4	4.40106	0.5	0.22292		NA	19.7428	1.25569	4.30325	0.32848
XM_003516215.1	5	3.5049	4	4.40106	0.5	0.22292		NA	19.7428	1.25569	4.30325	0.32848
XM_003506331.1	6	0.136469	8	0.285605	1	0.0144663	O60437	0	19.7428	2.09282	4.30325	1.06545
XM_003510322.1	87	0.884931	31	0.49493	4	0.0258776	Q9HC84	1e-20	19.1258	0.559287	4.25745	-0.838339
XM_003508477.1	28	4.04902	23	5.22049	3	0.275922	O95865	1e-132	18.9202	1.28932	4.24185	0.366615
XM_003507063.1	31	3.44648	23	4.0136	3	0.212134	Q99527	9e-176	18.9202	1.16455	4.24185	0.219773
XM_003496189.1	48	20.4657	46	30.7848	6	1.62709	P01148	2e-33	18.9202	1.50421	4.24185	0.589007
XM_003498389.1	19	1.88441	23	3.58048	3	0.189242	O43613	0	18.9202	1.90006	4.24185	0.926042
XM_003501784.1	35	3.95498	23	4.0794	3	0.215611	Q96IW2	1e-137	18.9202	1.03146	4.24185	0.0446868
XM_003504045.1	44	3.54956	45.5	5.76137	6	0.307856	Q6NXR0	3e-61	18.7145	1.62312	4.22608	0.698771
XM_003500618.1	36	4.25395	15	2.7821	2	0.150312	Q7Z7D3	8e-121	18.5088	0.654005	4.21014	-0.612627
XM_003510934.1	101	13.6508	30	6.36428	4	0.343851	P55042	4e-135	18.5088	0.466221	4.21014	-1.10091
XM_003496448.1	15	1.14038	15	1.78995	2	0.0967081	Q9Y6K8	0	18.5088	1.56961	4.21014	0.650408
XM_003515879.1	24	8.63119	15	8.46726	2	0.457471		NA	18.5088	0.981007	4.21014	-0.0276641
XM_003495360.1	78	8.61008	30	5.19788	4	0.280832	P00480	0	18.5088	0.603697	4.21014	-0.728104
XM_003501048.1	34	0.642085	37	1.09675	5	0.0600562	Q8IVV2	2e-23	18.2621	1.70811	4.19078	0.772398
XM_003504011.1	74	10.701	18.5	4.19909	2.5	0.229935	Q8TCQ1	3e-147	18.2621	0.392403	4.19078	-1.34959
XM_003496052.1	80.5	8.11365	40	6.32809	5.5	0.35258	Q8NEB7	7e-23	17.948	0.779931	4.16575	-0.358581
XM_003497322.1	36	2.77776	36	4.36001	5	0.245379	Q13702	0	17.7685	1.56961	4.15125	0.650408
XM_003498484.1	88	8.21555	128	18.7567	18	1.06881	O60383	0	17.5491	2.28307	4.13333	1.19098
XM_003508819.1	12.1	1.65706	7.01923	1.5088	1	0.0871013	Q5HYW3	2e-22	17.3224	0.910531	4.11457	-0.13522
XM_003508014.1	23	2.16189	7	1.03275	1	0.0597832	Q8IWF9	2e-129	17.2749	0.477708	4.11061	-1.0658
XM_003499764.1	13	1.09279	14	1.84719	2	0.106929	P19235	0	17.2749	1.69035	4.11061	0.757323
XM_003499883.1	8	0.932007	7	1.28003	1	0.0740975	Q96S42	5e-157	17.2749	1.37341	4.11061	0.457763
XM_003510321.1	20	0.589282	7	0.323731	1	0.0187399	Q8IWQ3	0	17.2749	0.549364	4.11061	-0.864165
XM_003500943.1	4	0.486086	7	1.33519	1	0.0772907	O75344	7e-140	17.2749	2.74682	4.11061	1.45776
XM_003508478.1	15	2.53211	7	1.85473	1	0.107366	O95865	5e-107	17.2749	0.732486	4.11061	-0.449128
XM_003509482.1	118	12.5456	49	8.17704	7	0.473348	Q16816	0	17.2749	0.651788	4.11061	-0.617525
XM_003510647.1	11	0.529611	7	0.528999	1	0.0306223	Q99665	0	17.2749	0.998844	4.11061	-0.00166885
XM_003496111.1	18	0.340653	11.6667	0.34656	1.66667	0.0200615	Q01668	0	17.2749	1.01734	4.11061	0.0248034
XM_003497191.1	9	0.712156	7	0.869407	1	0.0503277	P14672	0	17.2749	1.22081	4.11061	0.287838
XM_003496778.1	16	0.633836	7	0.435258	1	0.025196	Q92954	1e-48	17.2749	0.686705	4.11061	-0.542237
XM_003513296.1	9	1.20071	3.5	0.732919	0.5	0.0424268	P35503	3e-104	17.2749	0.610405	4.11061	-0.712162
XM_003497590.1	4	0.221758	21	1.82739	3	0.105783	O43506	0	17.2749	8.24046	4.11061	3.04273
XM_003500386.1	3	0.113447	7	0.415492	1	0.0240518	Q14416	0	17.2749	3.66243	4.11061	1.8728
XM_003513269.1	4.5	0.316693	3.5	0.386622	0.5	0.0223805		NA	17.2749	1.22081	4.11061	0.287838
XM_003515972.1	10	1.44104	3.5	0.791655	0.5	0.0458268	P35503	2e-103	17.2749	0.549364	4.11061	-0.864165
XM_003514830.1	7	0.820126	7	1.28728	1	0.0745173	Q7Z5P9	2e-105	17.2749	1.56961	4.11061	0.650408
XM_003511940.1	7	0.437318	7	0.68642	1	0.039735	A6NG13	6e-123	17.2749	1.56961	4.11061	0.650408
XM_003511724.1	4	0.116174	7	0.319108	1	0.0184723	Q76LX8	0	17.2749	2.74682	4.11061	1.45776
XM_003501652.1	27	1.56395	14	1.27286	2	0.0736823	Q5T1A1	0	17.2749	0.813873	4.11061	-0.297125
XM_003513487.1	13	1.13909	21	2.8882	3	0.16719	Q86SS6	0	17.2749	2.53553	4.11061	1.34229
XM_003502687.1	68	10.264	7	1.65843	1	0.0960022	Q8N4L8	2e-78	17.2749	0.161578	4.11061	-2.6297
XM_003502723.1	24	1.83473	14	1.67989	2	0.0972444	O95800	0	17.2749	0.915607	4.11061	-0.1272
XM_003506011.1	36.5	4.61639	20.5	4.06964	3	0.241327	Q8NGQ1	7e-163	16.8636	0.881563	4.07584	-0.181865
XM_003502750.1	4	0.242568	3.33333	0.317281	0.5	0.0192849	Q9UNQ0	2e-168	16.4523	1.30801	4.04022	0.387373
XM_003503500.1	57	4.23231	33	3.84599	5	0.236127	A6NIV6	0	16.2878	0.908723	4.02572	-0.138088
XM_003502133.1	50	2.97253	13	1.21309	2	0.0756241	Q6P5Q4	0	16.041	0.408099	4.00369	-1.29301
XM_003514660.1	7	1.08024	6.5	1.57445	1	0.0981515	Q96GR4	2e-78	16.041	1.4575	4.00369	0.543493
XM_003508503.1	60	16.7667	26	11.4041	4	0.710935	Q5SSQ6	1e-52	16.041	0.680165	4.00369	-0.556043
XM_003506012.1	36.5	4.61639	19.5	3.87112	3	0.241327	Q8NGQ1	6e-163	16.041	0.83856	4.00369	-0.254014
XM_003503083.1	6	1.01284	13	3.44451	2	0.214731	O14788	1e-118	16.041	3.40083	4.00369	1.76589
XM_003497026.1	12	0.248893	6.5	0.211611	1	0.0131919	Q9HC10	0	16.041	0.850206	4.00369	-0.234115
XM_003506109.1	5	0.594221	13	2.42501	2	0.151176	Q8IYK8	9e-120	16.041	4.08099	4.00369	2.02892
XM_003497025.1	11	0.227582	6.5	0.211082	1	0.0131589	Q9HC10	0	16.041	0.927498	4.00369	-0.108584
XM_003497940.1	124	7.55653	253	24.1999	39	1.51161	Q9C0D0	3e-48	16.0094	3.20251	4.00084	1.67921
XM_003501631.1	138.5	35.8003	74.5	30.2264	11.5	1.89064	P33316	9e-62	15.9874	0.844304	3.99886	-0.244166
XM_003498556.1	69	2.02773	22.5	1.03785	3.5	0.0654188	Q9NZW5	0	15.8647	0.51183	3.98775	-0.966264
XM_003498557.1	69	2.00775	22.5	1.02763	3.5	0.0647745	Q9NZW5	0	15.8647	0.51183	3.98775	-0.966264
XM_003516167.1	14	2.31604	16	4.1546	2.5	0.263046	Q13569	4e-112	15.7942	1.79384	3.98132	0.843053
XM_003502409.1	44	7.05327	25	6.29028	4	0.407823	Q7Z4M0	4e-100	15.424	0.891825	3.94711	-0.165168
XM_003498624.1	20.1111	7.31746	33.2111	18.9671	5.33333	1.23423	P62805	4e-41	15.3675	2.59203	3.94181	1.37408
XM_003504032.1	3426	597.016	2035	556.616	331	36.686		NA	15.1724	0.932329	3.92338	-0.101089
XM_003503095.1	7.5	0.304699	3	0.191304	0.5	0.0129197	Q63HQ2	0	14.8071	0.627845	3.88821	-0.67152
XM_003501232.1	3.16667	0.29901	2	0.296419	0.333333	0.0200187	Q8NEY4	0	14.8071	0.991334	3.88821	-0.0125572
XM_003503094.1	7.5	0.307112	3	0.192819	0.5	0.0130221	Q63HQ2	0	14.8071	0.627845	3.88821	-0.67152
XM_003511396.1	25	1.78574	12	1.3454	2	0.0908622	Q8NGI8	3e-113	14.8071	0.753414	3.88821	-0.408486
XM_003497748.1	8	0.335901	6	0.395426	1	0.0267052	Q9Y6L7	0	14.8071	1.17721	3.88821	0.23537
XM_003508556.1	9	1.07268	6	1.12246	1	0.0758058	Q9H0I2	2e-151	14.8071	1.04641	3.88821	0.0654453
XM_003513482.1	4	1.19015	18	8.40635	3	0.567725		NA	14.8071	7.06325	3.88821	2.82033
XM_003502430.1	22	2.41345	6	1.03314	1	0.0697735	Q8N0Z2	4e-173	14.8071	0.428076	3.88821	-1.22406
XM_003508502.1	13	0.574414	6	0.416126	1	0.0281032	Q9Y334	0	14.8071	0.724436	3.88821	-0.465069
XM_003501230.1	3.16667	0.305996	2	0.303344	0.333333	0.0204864	Q8NEY4	0	14.8071	0.991334	3.88821	-0.0125572
XM_003511599.1	1	0.0706166	6	0.665044	1	0.0449139	Q13285	0	14.8071	9.41767	3.88821	3.23537
XM_003515300.1	0.5	0.0952945	2	0.598301	0.333333	0.0404064	P33260	8e-95	14.8071	6.27845	3.88821	2.65041
XM_003498414.1	9	0.415424	6	0.434703	1	0.0293578	P41180	2e-173	14.8071	1.04641	3.88821	0.0654453
XM_003500700.1	116	31.4935	78	33.2391	13	2.24481		NA	14.8071	1.05543	3.88821	0.0778291
XM_003515423.1	3	0.358939	2	0.375597	0.333333	0.0253661	P47881	3e-138	14.8071	1.04641	3.88821	0.0654453
NM_001256759.1	16	1.14684	12	1.35007	2	0.0911771	P49895	1e-121	14.8071	1.17721	3.88821	0.23537
XM_003501429.1	12	0.844037	6	0.662405	1	0.0447357	Q502W7	0	14.8071	0.784806	3.88821	-0.349592
XM_003498894.1	1	0.102625	6	0.966487	1	0.065272	O00155	2e-104	14.8071	9.41767	3.88821	3.23537
XM_003515313.1	15	0.750142	6	0.470972	1	0.0318073	Q86Z14	2e-46	14.8071	0.627845	3.88821	-0.67152
XM_003502764.1	33	4.26502	12	2.43434	2	0.164404	Q8NCR3	7e-134	14.8071	0.570768	3.88821	-0.809024
XM_003501417.1	6	0.377123	6	0.591936	1	0.0399766	P42357	0	14.8071	1.56961	3.88821	0.650408
XM_003501231.1	2.66667	0.288711	2	0.339873	0.333333	0.0229534	Q8NEY4	0	14.8071	1.17721	3.88821	0.23537
XM_003497067.1	11	1.19406	6	1.02229	1	0.0690409	Q99674	6e-82	14.8071	0.856152	3.88821	-0.224061
XM_003502178.1	10.9036	4.33604	36.777	22.9558	6.20675	1.56986	P62805	4e-41	14.6228	5.29419	3.87015	2.40441
XM_003515134.1	32	2.6469	32.5	4.21952	5.5	0.289351	P19099	0	14.5827	1.59414	3.86619	0.672776
XM_003502162.1	3.01349	1.19838	4.32857	2.70185	0.736111	0.186184	P62805	4e-41	14.5117	2.25459	3.85915	1.17286
XM_003506602.1	64	17.0401	29	12.1195	5	0.846715		NA	14.3135	0.71123	3.83931	-0.491611
XM_003505099.1	38	7.78018	23	7.39139	4	0.520883	Q9UHG2	6e-25	14.1901	0.950028	3.82681	-0.0739577
XM_003498555.1	1790	94.5875	1420	117.777	248	8.33502	O60443	0	14.1304	1.24517	3.82073	0.316339
XM_003502172.1	10.2	4.05625	30.2	18.8505	5.3	1.34052	P62805	4e-40	14.0621	4.64728	3.81374	2.21639
XM_003504010.1	109	15.7622	25.5	5.78794	4.5	0.413884	Q8TCQ1	7e-135	13.9845	0.367203	3.80575	-1.44535
XM_003503577.1	14.8333	1.95582	11.3333	2.34552	2	0.167723	Q6IEY1	2e-127	13.9845	1.19925	3.80575	0.262137
XM_003512179.1	12.4536	4.9366	21.2437	13.2177	3.83175	0.966063	P62805	4e-41	13.682	2.67749	3.77421	1.42088
NM_001244021.1	57.4583	4.06214	25.5917	2.83983	4.625	0.207964	Q16696	0	13.6554	0.699098	3.7714	-0.516434
XM_003516046.1	7	1.23368	5.5	1.52146	1	0.112093	Q96GR4	2e-58	13.5732	1.23327	3.76268	0.302485
XM_003511579.1	3	0.212819	11	1.22482	2	0.0902388	Q8IYT1	5e-156	13.5732	5.75524	3.76268	2.52488
XM_003496602.1	4	0.23964	11	1.03439	2	0.0762084	Q04756	0	13.5732	4.31643	3.76268	2.10984
XM_003512829.1	53	1.49012	22	0.970867	4	0.0715285	P20023	4e-122	13.5732	0.651537	3.76268	-0.618081
XM_003506092.1	6	0.184496	11	0.530909	2	0.0391146	A4FU69	0	13.5732	2.87762	3.76268	1.52488
XM_003501834.1	24	2.58486	11	1.85956	2	0.137003	Q9BYG4	2e-162	13.5732	0.719405	3.76268	-0.475123
XM_003516073.1	744.5	125.336	601.5	158.942	109.5	11.7246	Q9NRD5	2e-30	13.5562	1.26813	3.76089	0.342701
XM_003507682.1	1551	133.916	1267	171.708	231	12.6855	O60879	0	13.5358	1.2822	3.7587	0.358626
XM_003503843.1	79	12.0563	49	11.7375	9	0.873584		NA	13.4361	0.973557	3.74804	-0.0386631
XM_003505948.1	18	1.62305	38	5.37819	7	0.401451	Q96FJ0	0	13.3969	3.31363	3.74382	1.72841
XM_003514351.1	115	7.58556	65	6.7297	12	0.503437	Q12889	0	13.3675	0.887172	3.74066	-0.172714
XM_003501420.1	122	7.047	27	2.44794	5	0.183691	Q9H0E7	0	13.3264	0.347373	3.73621	-1.52544
XM_003504710.1	6.14286	0.483914	4	0.494596	0.75	0.037578	P78329	0	13.1618	1.02207	3.71829	0.031498
XM_003499718.1	24	2.88543	16	3.01933	3	0.229401	Q96GM1	2e-166	13.1618	1.04641	3.71829	0.0654453
XM_003503672.1	3.66667	0.466601	2.66667	0.532642	0.5	0.0404686	Q6IF00	2e-149	13.1618	1.14154	3.71829	0.190976
XM_003499184.1	16.5	0.674534	8	0.513337	1.5	0.0390019	P10826	0	13.1618	0.761024	3.71829	-0.393986
XM_003502351.1	56	4.2705	16	1.91515	3	0.145508	Q5T7M9	0	13.1618	0.448461	3.71829	-1.15695
XM_003510496.1	48	4.20588	16	2.20053	3	0.16719	Q6ZSG2	0	13.1618	0.523204	3.71829	-0.934555
XM_003498266.1	31	2.7791	16	2.25141	3	0.171056	P78540	1e-174	13.1618	0.810122	3.71829	-0.303788
XM_003515454.1	168	13.3875	53	6.62916	10	0.506832	Q6ZNE9	5e-150	13.0796	0.495175	3.70924	-1.01399
XM_003511578.1	40	9.08963	375	133.755	71	10.2617	P18847	1e-81	13.0344	14.7151	3.70425	3.87923
XM_003504178.1	149	19.751	58	12.0677	11	0.927406	Q7RTY5	7e-97	13.0123	0.61099	3.7018	-0.71078
XM_003502938.1	18	7.4444	21	13.6323	4	1.05218	P02818	2e-29	12.9562	1.83121	3.69557	0.8728
XM_003503826.1	44.5404	0.72013	21	0.532928	4	0.0411331		NA	12.9562	0.740044	3.69557	-0.434318
XM_003498336.1	217	41.9376	131	39.7381	25	3.07297	P09016	1e-41	12.9315	0.947554	3.69282	-0.0777204
XM_003509961.1	76	10.2052	47	9.90597	9	0.768641	Q5T7M4	2e-73	12.8876	0.970681	3.68792	-0.0429308
XM_003513341.1	54	3.60213	26	2.72227	5	0.212134	Q8WY07	0	12.8328	0.755739	3.68176	-0.40404
XM_003505845.1	546.56	53.3545	646.04	98.9885	126	7.82308	Q8N140	7e-141	12.6534	1.8553	3.66145	0.891652
XM_003502196.1	12.1869	3.73351	31.5103	15.152	6.16508	1.20126	P62805	7e-39	12.6134	4.05837	3.65689	2.0209
XM_003498454.1	131.667	6.74776	49.3333	3.96841	9.66667	0.31509	Q13443	2e-122	12.5945	0.588108	3.65472	-0.765848
XM_003503567.1	7762	400.107	5178	418.945	1022	33.5064	P42331	0	12.5034	1.04708	3.64425	0.0663744
XM_003511131.1	1772	93.7961	501	41.6247	99	3.33296	Q8TE96	0	12.4888	0.443779	3.64256	-1.17209
XM_003513406.1	32.8333	3.89087	19.25	3.58059	3.83333	0.288923	P41180	1e-62	12.3929	0.920255	3.63144	-0.119895
XM_003515853.1	8.83333	0.801156	1	0.142359	0.2	0.0115371	Q8TAQ5	3e-27	12.3392	0.177692	3.62518	-2.49255
XM_003500536.1	6	0.965552	5	1.26295	1	0.102353	Q9BR10	7e-72	12.3392	1.30801	3.62518	0.387373
XM_003505910.1	82.5	3.74947	15	1.07004	3	0.0867185	P41180	4e-119	12.3392	0.285384	3.62518	-1.80902
XM_003513712.1	3	0.387729	5	1.01431	1	0.0822019	Q6J272	1e-142	12.3392	2.61602	3.62518	1.38737
XM_003499624.1	13	0.443241	5	0.267583	1	0.0216856	Q13474	0	12.3392	0.603697	3.62518	-0.728104
XM_003505658.1	1	0.0912304	2.5	0.357991	0.5	0.0290124	Q5SQS7	6e-178	12.3392	3.92403	3.62518	1.97234
XM_003510060.1	7	0.672224	5	0.753665	1	0.0610788	O15178	0	12.3392	1.12115	3.62518	0.164981
XM_003509744.1	15	1.44271	15	2.2645	3	0.18352	Q7RTX7	5e-158	12.3392	1.56961	3.62518	0.650408
XM_003499030.1	9	0.382811	10	0.667628	2	0.0541061	Q8NBS3	0	12.3392	1.74401	3.62518	0.802411
XM_003515133.1	15	1.5432	10	1.61482	2	0.130869	A0PJX8	5e-127	12.3392	1.04641	3.62518	0.0654453
XM_003511052.1	3.5	0.795342	2.5	0.891699	0.5	0.0722654	P04808	4e-30	12.3392	1.12115	3.62518	0.164981
XM_003509704.1	3	0.27695	5	0.724506	1	0.0587156	Q9GZZ6	0	12.3392	2.61602	3.62518	1.38737
XM_003504219.1	11	0.629233	5	0.448933	1	0.0363826	Q08426	0	12.3392	0.71346	3.62518	-0.487096
XM_003496898.1	24	1.46832	10	0.960291	2	0.0778243	Q6P988	0	12.3392	0.654005	3.62518	-0.612627
XM_003502984.1	12	0.664382	5	0.434509	1	0.0352137	P12821	5e-174	12.3392	0.654005	3.62518	-0.612627
XM_003507382.1	9	1.0789	5	0.940807	1	0.0762452		NA	12.3392	0.872007	3.62518	-0.197589
XM_003508640.1	143	24.5401	35	9.42759	7	0.764034	Q9HAP6	2e-101	12.3392	0.384171	3.62518	-1.38018
XM_003499235.1	5	0.421159	5	0.661056	1	0.0535735	Q8IWU9	0	12.3392	1.56961	3.62518	0.650408
XM_003505094.1	19	1.11672	10	0.922535	2	0.0747644	Q9NSA2	0	12.3392	0.826112	3.62518	-0.275592
XM_003502226.1	2	0.641206	5	2.51611	1	0.203912	Q8N8F7	6e-42	12.3392	3.92403	3.62518	1.97234
XM_003498547.1	22	7.05327	10	5.03222	2	0.407823	Q6PI97	5e-34	12.3392	0.71346	3.62518	-0.487096
XM_003497382.1	13	0.454481	15	0.823107	3	0.0667065	Q9Y6C5	0	12.3392	1.81109	3.62518	0.856859
XM_003506330.1	14	1.40536	5	0.787812	1	0.0638461	Q6NXR0	4e-57	12.3392	0.560576	3.62518	-0.835019
XM_003506852.1	48	14.8147	20	9.68891	4	0.785212	Q8NFU3	4e-44	12.3392	0.654005	3.62518	-0.612627
XM_003506014.1	38	5.03717	20	4.16126	4	0.337238	P0C7N8	4e-128	12.3392	0.826112	3.62518	-0.275592
XM_003511312.1	17	2.09875	5	0.968891	1	0.0785212	O75829	3e-168	12.3392	0.461651	3.62518	-1.11513
XM_003498303.1	7	0.220996	5	0.24777	1	0.0200798	Q502W6	0	12.3392	1.12115	3.62518	0.164981
XM_003508116.1	2	0.32608	5	1.27955	1	0.103697		NA	12.3392	3.92403	3.62518	1.97234
XM_003507839.1	17	0.224771	10	0.207531	2	0.0168188	A6NE01	1e-46	12.3392	0.923301	3.62518	-0.115127
XM_003501321.1	94	3.2451	45	2.4384	9	0.197614	P29474	0	12.3392	0.75141	3.62518	-0.412328
XM_003495351.1	4	0.11741	5	0.230361	1	0.018669	Q68DX3	0	12.3392	1.96201	3.62518	0.972336
XM_003503378.1	9	1.55958	5	1.35997	1	0.110215	B0YJ81	2e-112	12.3392	0.872007	3.62518	-0.197589
XM_003510893.1	9	1.38888	5	1.21111	1	0.0981515	Q01892	1e-111	12.3392	0.872007	3.62518	-0.197589
XM_003495940.1	540	38.6611	469	52.7042	94	4.28038	Q0VFZ6	2e-168	12.313	1.36324	3.62211	0.447036
XM_003505871.1	174.167	13.3145	117.333	14.0791	23.5833	1.14667	Q04826	7e-85	12.2782	1.05742	3.61803	0.0805522
XM_003512091.1	254.833	12.6827	166.5	13.0066	33.75	1.06833	P41180	6e-79	12.1747	1.02553	3.60582	0.036376
XM_003496053.1	57.5	4.28997	32	3.74739	6.5	0.308442	Q8NEB7	2e-59	12.1494	0.873523	3.60281	-0.195082
XM_003507716.1	56	1.82509	49	2.5066	10	0.207286	Q96KN7	0	12.0924	1.37341	3.59603	0.457763
XM_003500355.1	287.75	27.0266	181.75	26.7943	37.3333	2.23022	P48728	8e-166	12.0142	0.991406	3.58667	-0.0124527
XM_003508837.1	3.73611	0.813249	4.25397	1.45342	0.875	0.12114	P01569	1e-50	11.9979	1.78717	3.58471	0.83768
XM_003499860.1	122	5.71853	68	5.00295	14	0.417376	Q05D60	0	11.9867	0.874866	3.58336	-0.192867
XM_003505169.1	45	6.16259	14.5	3.11681	3	0.261304	Q8NGL7	2e-103	11.9279	0.505764	3.57627	-0.983464
XM_003498068.1	647	31.9187	583	45.1442	121	3.79665	Q8NHP7	0	11.8905	1.41435	3.57174	0.500138
XM_003506013.1	49	6.4953	19	3.9532	4	0.337238	P0C7N8	3e-119	11.7223	0.608625	3.55118	-0.716374
XM_003506197.1	19.3333	1.4381	19	2.21834	4	0.189242	P40967	0	11.7223	1.54255	3.55118	0.625317
XM_003500470.1	32	2.71756	19	2.53265	4	0.216054	Q5T5N4	8e-136	11.7223	0.931957	3.55118	-0.101665
XM_003496106.1	28.6667	1.24276	52.1667	3.54972	11.0833	0.3056	O15083	0	11.6156	2.85633	3.53799	1.51416
XM_003501025.1	153	0.1884	367	0.709331	78	0.0610885	Q8WZ42	9e-21	11.6115	3.76502	3.53749	1.91266
XM_003514065.1	170	13.1417	61	7.4016	13	0.639177	Q5T5S1	0	11.5799	0.563214	3.53355	-0.828246
XM_003496108.1	30.6667	1.31978	51.8333	3.50135	11.0833	0.303374	O15083	0	11.5414	2.65299	3.52874	1.40762
XM_003507504.1	68	4.5729	14	1.47776	3	0.128315	Q86VW2	0	11.5166	0.323155	3.52564	-1.6297
XM_003514113.1	21	1.71305	14	1.79254	3	0.155649	Q8TED4	0	11.5166	1.04641	3.52564	0.0654453
XM_003496107.1	27	1.1512	47.8333	3.20117	10.25	0.277961	O15083	0	11.5166	2.78073	3.52564	1.47546
XM_003495098.1	19	2.05169	28	4.74579	6	0.412082	P34981	2e-95	11.5166	2.31311	3.52564	1.20984
XM_003495331.1	0	0	0.666667	0.129961	0.142857	0.0112847	O75112	7e-134	11.5166	#DIV/0!	3.52564	#DIV/0!
XM_003509986.1	22	1.27971	14	1.27823	3	0.11099	Q32MQ0	0	11.5166	0.998844	3.52564	-0.00166885
XM_003496105.1	27.6667	1.1944	49.1667	3.33162	10.5833	0.290595	O15083	0	11.4648	2.78937	3.51914	1.47994
XM_003513405.1	272.333	17.1694	160.167	15.8496	34.75	1.39342	P41180	8e-43	11.3746	0.923132	3.50774	-0.115392
XM_003506388.1	1086	79.7772	645	74.3706	140	6.54111		NA	11.3697	0.932228	3.50712	-0.101245
XM_003505581.1	85	10.3091	46	8.75696	10	0.771396	Q8N205	1e-87	11.3521	0.849437	3.50489	-0.235421
XM_003500354.1	274.25	25.0753	180.25	25.8682	39.3333	2.28736	P48728	3e-177	11.3092	1.03162	3.49943	0.0449155
XM_003512175.1	11.1869	4.25766	21.3437	12.7503	4.66508	1.12926	P62805	4e-41	11.2909	2.99468	3.49709	1.5824
XM_003505587.1	11.1869	4.25766	21.3437	12.7503	4.66508	1.12926	P62805	4e-41	11.2909	2.99468	3.49709	1.5824
XM_003503718.1	1072	63.2161	723	66.9212	159	5.96354	Q9Y6A2	0	11.2217	1.05861	3.48822	0.0821705
XM_003515883.1	21.5	2.88699	38.5	8.11446	8.5	0.725939	P43364	5e-66	11.1779	2.8107	3.48258	1.49093
XM_003509927.1	0.333333	0.0537114	1.5	0.379377	0.333333	0.0341618	Q9NPB3	1e-77	11.1053	7.06325	3.47318	2.82033
XM_003510473.1	41	3.68357	9	1.26917	2	0.114285	Q569H4	2e-91	11.1053	0.344549	3.47318	-1.53722
XM_003495629.1	39	2.79541	18	2.0251	4	0.182354	P21589	0	11.1053	0.724436	3.47318	-0.465069
XM_003499640.1	11	4.73891	9	6.08585	2	0.548012		NA	11.1053	1.28423	3.47318	0.360901
XM_003508048.1	31	4.21279	9	1.91974	2	0.172867	P55075	2e-112	11.1053	0.455694	3.47318	-1.13386
XM_003514327.1	7	0.313656	9	0.632981	2	0.056998	Q96DN2	0	11.1053	2.01807	3.47318	1.01298
XM_003509926.1	0.333333	0.0445186	1.5	0.314446	0.333333	0.028315	Q9NPB3	2e-100	11.1053	7.06325	3.47318	2.82033
XM_003498691.1	14	1.58633	9	1.60066	2	0.144135	Q9BUN1	1e-78	11.1053	1.00904	3.47318	0.0129779
XM_003507540.1	17	0.717431	9	0.596165	2	0.0536829	Q15014	1e-54	11.1053	0.830971	3.47318	-0.26713
XM_003502083.1	14	0.617281	9	0.622858	2	0.0560866	Q14934	0	11.1053	1.00904	3.47318	0.0129779
XM_003500380.1	5	0.0534339	4.5	0.0754834	1	0.00679705	Q9UPA5	0	11.1053	1.41265	3.47318	0.498405
XM_003513084.1	17	0.842688	9	0.700249	2	0.0630554	P09917	0	11.1053	0.830971	3.47318	-0.26713
XM_003514664.1	23	1.38663	9	0.851664	2	0.0766898	Q6TGC4	0	11.1053	0.614196	3.47318	-0.703229
XM_003501758.1	6	1.30604	4.5	1.53748	1	0.138445	Q13938	6e-72	11.1053	1.17721	3.47318	0.23537
XM_003497102.1	8	6.01568	4.5	5.31128	1	0.478265		NA	11.1053	0.882907	3.47318	-0.179667
XM_003500772.1	8	0.431372	9	0.761723	2	0.0685909	Q9UGI8	0	11.1053	1.76581	3.47318	0.820333
XM_003495695.1	17	0.248791	18	0.413476	4	0.0372323	Q96JP2	0	11.1053	1.66194	3.47318	0.73287
XM_003515145.1	13	1.1311	4.5	0.61456	1	0.0553393	P16233	0	11.1053	0.543327	3.47318	-0.880107
XM_003499240.1	21	2.40586	18	3.23679	4	0.291464	Q9NSI8	7e-109	11.1053	1.34538	3.47318	0.428015
XM_003501379.1	3	0.217291	9	1.02319	2	0.0921352	Q8TEU8	0	11.1053	4.70884	3.47318	2.23537
XM_003500353.1	336.75	28.0603	214.75	28.0873	48.3333	2.56156	P48728	0	10.9649	1.00096	3.45482	0.00138803
XM_003506038.1	5	0.65028	15.5	3.16413	3.5	0.289516	Q8NH90	5e-135	10.929	4.8658	3.45009	2.28268
XM_003505022.1	521	108.278	553.5	180.557	125.167	16.545	P09429	4e-81	10.9131	1.66752	3.44799	0.737708
XM_003513924.1	0.595833	0.0441619	3.07143	0.357319	0.7	0.0329986	P10275	3e-165	10.8283	8.09111	3.43674	3.01634
XM_003512266.1	81	8.65628	48	8.05156	11	0.747676	Q9HA47	1e-120	10.7688	0.93014	3.42878	-0.10448
XM_003506196.1	20.8333	1.34209	19.5	1.97174	4.5	0.184378	P40967	0	10.694	1.46916	3.41873	0.554988
XM_003503591.1	8.33333	1.08722	4.33333	0.887386	1	0.0829798	Q6IEY1	3e-128	10.694	0.816198	3.41873	-0.293009
XM_003506198.1	21.8333	1.39134	19.5	1.95047	4.5	0.182389	P40967	0	10.694	1.40187	3.41873	0.48735
XM_003499085.1	10	1.22723	13	2.50417	3	0.234166	Q96JZ2	3e-89	10.694	2.0405	3.41873	1.02892
XM_003510579.1	27	0.888589	13	0.671542	3	0.0627961	Q5VXU9	0	10.694	0.755739	3.41873	-0.40404
XM_003504351.1	23	0.95505	6.5	0.423647	1.5	0.0396154	P35523	0	10.694	0.443586	3.41873	-1.17271
XM_003504350.1	25	1.04756	6.5	0.42751	1.5	0.0399766	P35523	0	10.694	0.408099	3.41873	-1.29301
XM_003507505.1	56	3.98629	13	1.4525	3	0.135824	Q86VW2	0	10.694	0.364374	3.41873	-1.45651
XM_003499553.1	526	34.8439	177	18.4038	41	1.72742	P09067	4e-114	10.6539	0.528177	3.41331	-0.920906
XM_003514857.1	137	21.9613	69	17.3612	16	1.63129	Q8NEV9	9e-65	10.6426	0.790534	3.41178	-0.3391
XM_003505594.1	6.15833	2.44899	12.2722	7.66019	2.85556	0.722252	P62805	4e-41	10.606	3.1279	3.40681	1.64519
XM_003505595.1	6.15833	2.44899	12.2722	7.66019	2.85556	0.722252	P62805	4e-41	10.606	3.1279	3.40681	1.64519
XM_003506838.1	55	7.50719	17	3.64213	4	0.347255	Q00526	4e-147	10.4883	0.485153	3.39072	-1.04349
XM_003507036.1	140	2.76905	55	1.70749	13	0.163539	Q53TS8	4e-21	10.4409	0.616633	3.38417	-0.697515
XM_003508068.1	20	1.91471	55	8.26473	13	0.791574	P33260	2e-150	10.4409	4.31643	3.38417	2.10984
XM_003501534.1	53	3.30613	42	4.11231	10	0.396751	A6NI56	0	10.365	1.24384	3.37364	0.314805
XM_003513863.1	33	1.31231	10.5	0.655399	2.5	0.0632322	Q5SZQ8	0	10.365	0.499422	3.37364	-1.00167
NM_001244087.1	14.5	1.04719	5.25	0.595124	1.25	0.0574169	P21217	2e-128	10.365	0.568308	3.37364	-0.815256
XM_003502126.1	22.2833	0.926221	8.4	0.548032	2	0.0528736	Q8NA54	0	10.365	0.591686	3.37364	-0.757096
XM_003506293.1	29	3.67907	21	4.18169	5	0.403445	O95238	1e-169	10.365	1.13662	3.37364	0.184744
XM_003514778.1	509	24.6212	159	12.072	38	1.16909	Q14162	0	10.326	0.490311	3.36821	-1.02823
XM_003507528.1	49	1.95423	25	1.56499	6	0.152196	Q99490	0	10.2827	0.800822	3.36215	-0.320446
XM_003515552.1	171.833	14.0448	96.0833	12.3267	23.0833	1.2	P41180	4e-39	10.2723	0.877673	3.36069	-0.188244
XM_003514251.1	1790	93.4728	1128	92.4557	271	9.00069	Q5MIZ7	0	10.2721	0.989119	3.36065	-0.0157847
XM_003507612.1	25	1.15783	29	2.10812	7	0.206195	P09327	0	10.2239	1.82075	3.35388	0.864533
XM_003501992.1	119	11.6625	91	13.9984	22	1.37133	P20719	8e-25	10.2079	1.20029	3.35162	0.263385
XM_003499556.1	45	4.66052	33	5.36449	8	0.52697	P14652	2e-100	10.1799	1.15105	3.34765	0.202949
XM_003515250.1	54.5	5.30353	20.5	3.13123	5	0.309466	P98088	6e-22	10.1182	0.590404	3.33888	-0.760224
XM_003512360.1	102	18.8326	53	15.3595	13	1.52661		NA	10.0612	0.815583	3.33073	-0.294097
[truncated: 19,608 more rows]
