# Supplementary material for: The midbody and midbody remnant are assembly sites for RNA and active translation
Source: Research Square preprint supplement (doi:10.21203/rs.3.rs-2256478/v1), 2022-11-23
Supplement: Supplementary file 36 [file Table 4 Legend.docx]

Table 4: Raw Data from CHO cell RNA Seq

Raw Data from RNA Seq experiment on all three libraries (Interphase, Metaphase, Midbody). CHO Refseq Accession number for each transcript is displayed, as well as the read count and RPKM for each transcript in each library. The Human Uniprot ID corresponding to each transcript is displayed, along with the e-value for each ID. Midbody over Interphase and Midbody over Metaphase enrichment scores are displayed, as well as the enrichment scores after Log2 transformation. *Ints2* (Uniprot ID Q9H0H0) and *Cse1l* (Uniprot ID P55060) used as controls in the qPCR experiment are highlighted in yellow at the top.
